# Supplementary material for: Advancements in drug discovery: integrating CADD tools and drug repurposing for PD-1/PD-L1 axis inhibition
Source: RSC Adv. 2025 Jan 23;15(4):2298–316. doi: 10.1039/d4ra08245a (PMC11755407; doi:10.1039/d4ra08245a)
Supplement: RA-015-D4RA08245A-s003 [file RA-015-D4RA08245A-s003.xlsx]

## Sheet: Table S3 - Train Set
				Predicted Probabilities of Being Active
Compound Nº	Compound ID	SMILES	Experimental activity	Random Forest (RF)	Support vector machine (SVM)	Deep Learning Multilayer Perceptron Networks (dMLP)
1	PUBCHEM_CID_6857767	[H]OC([H])([H])[C@]1(C([H])([H])[H])[C@]([H])(O[H])C([H])([H])C([H])([H])[C@@]2(C([H])([H])[H])[C@@]([H])(C(=C([H])[H])C([H])([H])C([H])([H])[C@]12[H])C([H])([H])C(\[H])=C1\C(=O)OC([H])([H])[C@@]1([H])O[H]	0 (Inactive)	0	0	0
2	PUBCHEM_CID_6708597	[H]OC([H])([H])[C@@]1(C([H])([H])[H])C([H])([H])C([H])([H])C([H])([H])[C@]2(C([H])([H])[H])[C@@]([H])(C(=C([H])[H])C([H])([H])C([H])([H])[C@@]12[H])C([H])([H])C([H])([H])[C@](O[H])(C([H])=C([H])[H])C([H])([H])[H]	0 (Inactive)	0	0	0
3	PUBCHEM_CID_5377914	[H]Oc1c([H])c(O[H])c2c(oc3c([H])c(OC([H])([H])[H])c([H])c(c3c2=O)C([H])([H])[H])c1[H]	0 (Inactive)	0	0	0
4	PUBCHEM_CID_5839209	[H]C(=O)C(\[H])=C(/[H])c1c([H])c(OC([H])([H])[H])c(OC([H])([H])[H])c(OC([H])([H])[H])c1[H]	0 (Inactive)	0	0	0
5	PUBCHEM_CID_6708658	[H]OC(=O)[C@]12C([H])([H])C([H])([H])[C@@]([H])(C([H])([H])[H])[C@]([H])(C([H])([H])[H])[C@]1([H])C1=C([H])C(=O)[C@]3([H])[C@@]4(C([H])([H])[H])C([H])([H])C([H])([H])[C@]([H])(OC(=O)C([H])([H])[H])C(C([H])([H])[H])(C([H])([H])[H])[C@]4([H])C([H])([H])C([H])([H])[C@@]3(C([H])([H])[H])[C@]1(C([H])([H])[H])C([H])([H])C2([H])[H]	0 (Inactive)	0	0	0
6	PUBCHEM_CID_6708558	[H]O[C@@]12C([H])([H])c3c(c([H])c(OC(=O)C([H])([H])[H])c(OC(=O)C([H])([H])[H])c3OC(=O)C([H])([H])[H])[C@]1([H])c1c([H])c([H])c(OC(=O)C([H])([H])[H])c(OC(=O)C([H])([H])[H])c1OC2([H])[H]	0 (Inactive)	0	0	0
7	PUBCHEM_CID_5281650	[H]Oc1c([H])c2oc3c([H])c(O[H])c(c(O[H])c3c(=O)c2c(c1OC([H])([H])[H])C([H])([H])C([H])=C(C([H])([H])[H])C([H])([H])[H])C([H])([H])C([H])=C(C([H])([H])[H])C([H])([H])[H]	0 (Inactive)	0	0	0
8	PUBCHEM_CID_9605260	[H]O\N=C1/C([H])([H])[C@]2([H])C([H])([H])[C@]([H])([C@]1([H])C([H])([H])[H])C2(C([H])([H])[H])C([H])([H])[H]	0 (Inactive)	0	0	0
9	PUBCHEM_CID_5702034	[H]C1=C2C([H])([H])C([H])([H])[C@@]3([H])[C@]4([H])C([H])([H])C([H])([H])[C@]([H])(C(=O)C([H])([H])OC(=O)C([H])([H])[H])[C@@]4(C([H])([H])[H])C([H])([H])C([H])([H])[C@]3([H])[C@@]2(C([H])([H])[H])C([H])([H])C([H])([H])C1=O	0 (Inactive)	0	0	0
11	PUBCHEM_CID_96009	[H]Oc1c([H])c([H])c(OC(=O)C([H])([H])[H])c([H])c1[H]	0 (Inactive)	0	0	0
12	PUBCHEM_CID_54676535	[H]Oc1c([H])c([H])c(c([H])c1[H])-c1c(O[H])c2c(OC([H])([H])[H])c(c3OC(C([H])=C([H])c3c2oc1=O)(C([H])([H])[H])C([H])([H])[H])C([H])([H])C([H])=C(C([H])([H])[H])C([H])([H])[H]	0 (Inactive)	0	0	0
13	PUBCHEM_CID_4238966	[H]C(=C(C([H])([H])[H])C([H])([H])[H])C([H])([H])c1c(OC([H])([H])[H])c2c(OC(=O)C([H])([H])[H])c(-c3c([H])c([H])c(OC(=O)C([H])([H])[H])c([H])c3[H])c(=O)oc2c2C([H])=C([H])C(Oc12)(C([H])([H])[H])C([H])([H])[H]	0 (Inactive)	0	0	0
14	PUBCHEM_CID_71034	[H]c1c([H])c([H])c2c(oc3c([H])c([H])c(OC([H])([H])[H])c([H])c3c2=O)c1[H]	0 (Inactive)	0	0	0
15	PUBCHEM_CID_3983547	[H]N([H])C(=O)[C@@]1(C([H])([H])[H])C([H])([H])C([H])([H])C([H])([H])[C@]2(c3c([H])c([H])c(c([H])c3C([H])([H])C([H])([H])[C@]12[H])C([H])(C([H])([H])[H])C([H])([H])[H])C([H])([H])[H]	0 (Inactive)	0	0	0
16	PUBCHEM_CID_7595	[H]N(C(=O)N([H])c1c([H])c([H])c([H])c([H])c1[H])c1c([H])c([H])c([H])c([H])c1[H]	0 (Inactive)	0	0	0
17	PUBCHEM_CID_6708732	[H]c1oc2c(OC([H])([H])[H])c(OC([H])([H])[H])c([H])c([H])c2c(=O)c1-c1c([H])c([H])c(OC([H])([H])[H])c([H])c1[H]	0 (Inactive)	0	0	0
18	PUBCHEM_CID_2752274	[H]Oc1c([H])c([H])c(c([H])c1[H])C([H])([H])[C@@]1([H])N(C([H])([H])[H])C([H])([H])C([H])([H])c2c([H])c(OC([H])([H])[H])c(O[H])c([H])c12	0 (Inactive)	0	0	0
19	PUBCHEM_CID_6708584	[H]c1oc([H])c(c1[H])[C@]1([H])OC(=O)[C@]2([H])O[C@]22[C@@]1(C([H])([H])[H])C([H])([H])C([H])([H])[C@@]1([H])[C@]3(C(=O)C([H])=C([H])C(C([H])([H])[H])(C([H])([H])[H])[C@]3([H])C([H])([H])[C@@]([H])(OC(=O)C([H])([H])[H])[C@@]21C([H])([H])[H])C([H])([H])[H]	0 (Inactive)	0	0	0
20	PUBCHEM_CID_6716	[H]c1oc2c([H])c3oc(c([H])c(=O)c3c(OC([H])([H])[H])c2c1[H])C([H])([H])[H]	0 (Inactive)	0	0	0
21	PUBCHEM_CID_5701999	[H]Oc1c([H])c(c([H])c([H])c1OC([H])([H])[H])[C@@]1([H])Oc2c([H])c(O[C@]3([H])O[C@]([H])(C([H])([H])O[C@@]4([H])O[C@@]([H])(C([H])([H])[H])[C@]([H])(O[H])[C@@]([H])(O[H])[C@@]4([H])O[H])[C@@]([H])(O[H])[C@]([H])(O[H])[C@@]3([H])O[H])c([H])c(O[H])c2C(=O)C1([H])[H]	0 (Inactive)	0	0	0
22	PUBCHEM_CID_68094	[H]c1c([H])c2c3c([H])c([H])c(=O)c([H])c3n([H])c2c(n1[H])C([H])([H])[H]	0 (Inactive)	0	0	0
23	PUBCHEM_CID_637213	[H]Oc1c([H])c(O[C@]2([H])O[C@]([H])(C([H])([H])O[H])[C@@]([H])(O[H])[C@]([H])(O[H])[C@@]2([H])O[H])c([H])c(\C([H])=C(/[H])c2c([H])c([H])c(OC([H])([H])[H])c(O[H])c2[H])c1[H]	0 (Inactive)	0	0	0
24	PUBCHEM_CID_34751	[H]OC([H])([H])[C@@]1([H])O[C@@]([H])(OC([H])([H])[C@@]2([H])O[C@@]([H])(O[C@@]([H])(C#N)c3c([H])c([H])c([H])c([H])c3[H])[C@]([H])(O[H])[C@@]([H])(O[H])[C@]2([H])O[H])[C@]([H])(O[H])[C@@]([H])(O[H])[C@]1([H])O[H]	0 (Inactive)	0	0	0
25	PUBCHEM_CID_3092	[H]N([H])C(=O)c1c([H])c(c([H])c(c1C([H])([H])[H])[N+]([O-])=O)[N+]([O-])=O	0 (Inactive)	0	0	0
26	PUBCHEM_CID_5702210	[H]OP1(=O)OC([H])([H])[C@@]2([H])O[C@@]([H])(n3c([H])nc4c(nc([H])nc34)N([H])C(=O)C([H])([H])C([H])([H])C([H])([H])[H])[C@]([H])(OC(=O)C([H])([H])C([H])([H])C([H])([H])[H])[C@]2([H])O1	0 (Inactive)	0	0	0
28	PUBCHEM_CID_5639	[H]N(c1c([H])c(=O)n(c(=O)n1C([H])([H])[H])C([H])([H])[H])C([H])([H])C([H])([H])C([H])([H])N1C([H])([H])C([H])([H])N(c2c([H])c([H])c([H])c([H])c2OC([H])([H])[H])C([H])([H])C1([H])[H]	0 (Inactive)	0	0	0
29	PUBCHEM_CID_6708799	[H]O[C@@]1([H])C([H])([H])[C@]2(C([H])([H])[H])[C@]([H])(C([H])([H])C([H])([H])[C@]2(O[H])C(=O)C([H])([H])OC(=O)C([H])([H])[H])[C@@]2([H])C([H])([H])[C@@]([H])(C3=C([H])C(=O)C([H])=C([H])[C@@]3(C([H])([H])[H])[C@]12[H])C([H])([H])[H]	0 (Inactive)	0	0	0
30	PUBCHEM_CID_39147	[H]O[C@@]([H])(C([H])([H])Oc1c([H])c([H])c([H])c2c1C([H])([H])[C@]([H])(O[H])[C@]([H])(O[H])C2([H])[H])C([H])([H])N([H])C(C([H])([H])[H])(C([H])([H])[H])C([H])([H])[H]	0 (Inactive)	0	0	0
31	PUBCHEM_CID_4630	[H]C([H])(C#CC([H])([H])N1C([H])([H])C([H])([H])C([H])([H])C1([H])[H])N1C(=O)C([H])([H])C([H])([H])C1([H])[H]	0 (Inactive)	0	0	0
32	PUBCHEM_CID_5005498	[H]N1c2c([H])c([H])c([H])c([H])c2-c2n([H])c3c([H])c([H])c(c([H])c3c2C([H])([H])C1=O)[N+]([O-])=O	0 (Inactive)	0	0	0
33	PUBCHEM_CID_10258363	[H]O[C@@]1(C(=O)O[C@@]2([H])C3=C(C([H])([H])[H])[C@]([H])(OC(=O)C(=C(\[H])C([H])([H])[H])\C([H])([H])[H])[C@@]([H])(OC(=O)C([H])([H])C([H])([H])C([H])([H])C([H])([H])C([H])([H])[H])[C@]3([H])[C@](OC(=O)C([H])([H])[H])(C([H])([H])[H])C([H])([H])[C@]([H])(OC(=O)C([H])([H])C([H])([H])C([H])([H])[H])[C@]12O[H])C([H])([H])[H]	0 (Inactive)	0	0	0
34	PUBCHEM_CID_23863210	[H]OC([H])([H])[C@]1([H])O[C@@]([H])(n2c([H])nc3c(nc(Cl)nc23)N([H])[H])[C@]([H])(F)[C@@]1([H])O[H]	0 (Inactive)	0	0	0
35	PUBCHEM_CID_5328772	[H]Oc1c([H])c([H])c(\C([H])=C(/C#N)C(=O)N([H])[C@@]([H])(c2c([H])c([H])c([H])c([H])c2[H])C([H])([H])[H])c([H])c1O[H]	0 (Inactive)	0	0	0
36	PUBCHEM_CID_6539171	[H]c1c(Br)c(Br)sc1C(=O)C([H])([H])Cl	0 (Inactive)	0	0	0
37	PUBCHEM_CID_5717719	[H]OC(=O)[C@]([H])(N1C(=S)S\C(=C(\[H])c2c([H])c([H])c([H])c([H])c2[H])C1=O)C([H])(C([H])([H])[H])C([H])([H])[H]	0 (Inactive)	0	0	0
38	PUBCHEM_CID_4407	[H]Oc1c(Cl)c(Cl)c(O[H])c2C(=O)C([H])=C([H])C(=O)c12	0 (Inactive)	0	0	0
39	PUBCHEM_CID_5328770	[H]Oc1c([H])c([H])c(\C([H])=C(/C#N)C(=O)N([H])C([H])([H])C([H])([H])C([H])([H])c2c([H])c([H])c([H])c([H])c2[H])c([H])c1O[H]	0 (Inactive)	0	0	0
40	PUBCHEM_CID_2044	[H]Oc1c(Br)c([H])c(C([H])=C(C#N)C#N)c([H])c1C(C([H])([H])[H])(C([H])([H])[H])C([H])([H])[H]	0 (Inactive)	0	0	0
41	PUBCHEM_CID_5591	[H]Oc1c(c(c2O[C@@](C([H])([H])[H])(C([H])([H])Oc3c([H])c([H])c(c([H])c3[H])C([H])([H])[C@@]3([H])SC(=O)N([H])C3=O)C([H])([H])C([H])([H])c2c1C([H])([H])[H])C([H])([H])[H])C([H])([H])[H]	0 (Inactive)	0	0	0
42	PUBCHEM_CID_11345983	[H]OC([H])([H])C([H])([H])N([H])c1nc(nc([H])c1[H])N([H])c1c([H])c([H])c(OC([H])([H])[H])c([H])c1[H]	0 (Inactive)	0	0	0
43	PUBCHEM_CID_2426	[H]N([H])c1c([H])c2nc([H])nc(N([H])c3c([H])c([H])c([H])c(Br)c3[H])c2c([H])c1N([H])[H]	0 (Inactive)	0	0	0
44	PUBCHEM_CID_5329006	[H]N(c1nc([H])nc2c([H])c(OC([H])([H])[H])c(OC([H])([H])[H])c([H])c12)c1c([H])c([H])c(Cl)c([H])c1F	0 (Inactive)	0	0	0
45	PUBCHEM_CID_9549284	[H]N([H])C(\Sc1c([H])c([H])c(N([H])[H])c([H])c1[H])=C(\C#N)c1c([H])c([H])c([H])c([H])c1C(F)(F)F	0 (Inactive)	0	0	0
46	PUBCHEM_CID_5186	[H]ON([H])C(=O)C([H])([H])C([H])([H])C([H])([H])C([H])([H])C([H])([H])N1C(=O)c2c([H])c([H])c([H])c3c([H])c([H])c([H])c(C1=O)c23	0 (Inactive)	0	0	0
47	PUBCHEM_CID_5353593	[H]N1C(=O)\C(=C(/[H])c2c([H])c([H])c(c([H])c2[H])N(C([H])([H])[H])C([H])([H])[H])c2c([H])c([H])c([H])c([H])c12	0 (Inactive)	0	0	0
48	PUBCHEM_CID_5328775	[H]Oc1c([H])c([H])c(\C([H])=C(/C#N)C(=O)N([H])C([H])([H])C([H])([H])C([H])([H])C([H])([H])c2c([H])c([H])c([H])c([H])c2[H])c([H])c1O[H]	0 (Inactive)	0	0	0
49	PUBCHEM_CID_4262	[H]O[C@]1(N(C(=O)C(C(=O)C([H])([H])[H])=C1C([H])([H])[H])C([H])([H])C([H])([H])C([H])([H])C([H])([H])C([H])([H])C([H])([H])C([H])([H])C([H])([H])[H])C([H])([H])[H]	0 (Inactive)	0	0	0
50	PUBCHEM_CID_5470230	[H]Oc1c(c([H])c(\C([H])=C2\C(=O)c3c(c([H])c(OC([H])([H])[H])c(OC([H])([H])[H])c3N([H])[H])C2([H])[H])c([H])c1C([H])([H])[H])C([H])([H])[H]	0 (Inactive)	0	0	0
51	PUBCHEM_CID_5290	[H]Oc1c([H])c([H])c2c(c1OC([H])([H])[H])C([H])([H])N1C([H])([H])C([H])([H])c3c([H])c(OC([H])([H])[H])c(O[H])c([H])c3[C@@]1([H])C2([H])[H]	0 (Inactive)	0	0	0
52	PUBCHEM_CID_2428	[H]N(c1c([H])c([H])c([H])c(Br)c1[H])c1nc([H])nc2c([H])c3nc([H])n([H])c3c([H])c12	0 (Inactive)	0	0	0
53	PUBCHEM_CID_2422	[H]OC([H])([H])C([H])([H])C([H])([H])N([H])c1nc(N([H])C([H])([H])c2c([H])c([H])c([H])c([H])c2[H])c2nc([H])n(c2n1)C([H])(C([H])([H])[H])C([H])([H])[H]	0 (Inactive)	0	0	0
54	PUBCHEM_CID_310557	[H]N(C(=O)c1c([H])c([H])c(F)c([H])c1[H])c1c([H])c([H])c([H])c([H])c1C(=O)OC([H])([H])[H]	0 (Inactive)	0	0	0
55	PUBCHEM_CID_5329155	[H]N1C(=O)\C(=C(\[H])c2c([H])c3c(n2[H])C([H])([H])C([H])([H])C([H])([H])C3([H])[H])c2c([H])c(Br)c([H])c([H])c12	0 (Inactive)	0	0	0
56	PUBCHEM_CID_4706	[H]N([H])c1c([H])c2c(nc([H])nc2c([H])c1N([H])C([H])([H])[H])N([H])c1c([H])c([H])c([H])c(Br)c1[H]	0 (Inactive)	0	0	0
57	PUBCHEM_CID_2856	[H]OC([H])([H])C([H])([H])N([H])c1nc(N([H])c2c([H])c([H])c([H])c(Cl)c2[H])c2nc([H])n(c2n1)C([H])(C([H])([H])[H])C([H])([H])[H]	0 (Inactive)	0	0	0
58	PUBCHEM_CID_5353633	[H]C(=C(C([H])([H])[H])C([H])([H])[H])C([H])([H])C([H])([H])C(=C(/[H])C([H])([H])C([H])([H])C(=C(/[H])C([H])([H])Sc1nc([H])nn1[H])\C([H])([H])[H])\C([H])([H])[H]	0 (Inactive)	0	0	0
59	PUBCHEM_CID_5353962	[H]Oc1c(OC([H])([H])C([H])([H])[H])c([H])c(\C([H])=C(\C#N)C(=O)N([H])[H])c([H])c1C([H])([H])Sc1c([H])c([H])c([H])c([H])c1[H]	0 (Inactive)	0	0	0
60	PUBCHEM_CID_24058665	[H]OC([H])([H])C1=C([H])[C@@]2([H])[C@@]3([H])[C@](O[H])([C@]([H])(O[H])[C@@]([H])(C([H])([H])[H])[C@@]2(O[H])[C@]2([H])C([H])=C(C(=O)[C@@]2(O[H])C1([H])[H])C([H])([H])[H])C3(C([H])([H])[H])C([H])([H])[H]	0 (Inactive)	0	0	0
61	PUBCHEM_CID_5613	[H]Oc1c([H])c([H])c(c([H])c1[H])C([H])([H])C([H])(C#N)C#N	0 (Inactive)	0	0	0
62	PUBCHEM_CID_2794188	[H]N([H])[C@@]1([H])C([H])([H])C([H])([H])C([H])([H])C([H])([H])[C@@]1([H])N([H])c1nc(N([H])c2c([H])c([H])c([H])c(Cl)c2[H])c2nc([H])n(c2n1)C([H])([H])C([H])([H])[H]	0 (Inactive)	0	0	0
63	PUBCHEM_CID_443278	[H]c1c(nc2sc3c(n12)C([H])([H])C([H])([H])C([H])([H])C3([H])[H])-c1c([H])c([H])c(c([H])c1[H])C([H])([H])[H]	0 (Inactive)	0	0	0
64	PUBCHEM_CID_3854666	[H]Oc1c([H])c(c([H])c([H])c1N([H])C(=O)N([H])c1c([H])c([H])c([H])c([H])c1Br)[N+]([O-])=O	0 (Inactive)	0	0	0
65	PUBCHEM_CID_2427	[H]N(c1c([H])c([H])c([H])c(Br)c1[H])c1nc([H])nc2c([H])c3n(c([H])nc3c([H])c12)C([H])([H])[H]	0 (Inactive)	0	0	0
66	PUBCHEM_CID_6603989	[H]OC([H])([H])[C@@]([H])(N([H])c1nc(N([H])C([H])([H])c2c([H])c([H])c([H])c([H])c2[H])c2nc([H])n(c2n1)C([H])(C([H])([H])[H])C([H])([H])[H])C([H])([H])C([H])([H])[H]	0 (Inactive)	0	0	0
67	PUBCHEM_CID_4155347	[H]Oc1c([H])c([H])c([H])c([H])c1C([H])([H])N([H])c1nc(nc2n(c([H])nc12)C([H])(C([H])([H])[H])C([H])([H])[H])N([H])C([H])([H])C([H])([H])C([H])([H])O[H]	0 (Inactive)	0	0	0
68	PUBCHEM_CID_135512024	[H]Oc1n([H])c2c([H])c([H])c(c([H])c2c1-c1n([H])c2c([H])c([H])c([H])c([H])c2c1N=O)S(=O)(=O)O[H]	0 (Inactive)	0	0	0
69	PUBCHEM_CID_4705	[H]N(c1c([H])c([H])c([H])c(Br)c1[H])c1nc([H])nc2c([H])c(OC([H])([H])[H])c(OC([H])([H])[H])c([H])c12	0 (Inactive)	0	0	0
70	PUBCHEM_CID_6539732	[H]c1nc([H])c([H])c(c1[H])-c1nnc(SC([H])([H])c2c([H])c([H])c([H])c(I)c2[H])o1	0 (Inactive)	0	0	0
71	PUBCHEM_CID_9547215	[H]O[C@@]1([H])C([H])([H])C([H])([H])[C@@]2(C([H])([H])[H])[C@]([H])(C([H])([H])C([H])([H])[C@]3([H])[C@]2([H])C([H])([H])C([H])([H])[C@]2(C([H])([H])[H])[C@@]([H])(c4c([H])oc(=O)c([H])c4[H])C([H])([H])C([H])([H])[C@]32O[H])C1([H])[H]	0 (Inactive)	0	0	0
72	PUBCHEM_CID_5720188	[H]OC(=O)[C@]([H])(N1C(=S)S\C(=C(\[H])c2c([H])c([H])c(Br)c([H])c2[H])C1=O)C([H])(C([H])([H])[H])C([H])([H])[H]	0 (Inactive)	0	0	0
73	PUBCHEM_CID_275510	[H]OC(=O)c1c(Br)c(Br)c(Br)c(Br)c1-c1c2c([H])c([H])c(O[H])c([H])c2oc2c([H])c(=O)c([H])c([H])c12	0 (Inactive)	0	0	0
74	PUBCHEM_CID_3895	[H]OC(=O)c1c([H])c(c([H])c([H])c1O[H])N(C([H])([H])c1c([H])c([H])c([H])c([H])c1O[H])C([H])([H])c1c([H])c([H])c([H])c([H])c1O[H]	0 (Inactive)	0	0	0
75	PUBCHEM_CID_24167440	[H]OC([H])([H])[C@]1([H])O[C@@]([H])(n2c([H])nc3c(nc(Cl)nc23)N([H])[H])C([H])([H])[C@@]1([H])O[H]	0 (Inactive)	0	0	0
76	PUBCHEM_CID_5312137	[H]N1C(=O)\C(=C(\[H])c2c([H])c3c(n2[H])C([H])([H])C([H])([H])C([H])([H])C3([H])[H])c2c([H])c(c([H])c([H])c12)S(=O)(=O)N(C([H])([H])[H])C([H])([H])[H]	0 (Inactive)	0	0	0
77	PUBCHEM_CID_9839842	[H]N1C(=O)\C(=C(\[H])c2c([H])c([H])c(N(C([H])([H])[H])C([H])([H])[H])c3c([H])c([H])c([H])c([H])c23)c2c([H])c([H])c([H])c([H])c12	0 (Inactive)	0	0	0
78	PUBCHEM_CID_2776	[H]N(C(=O)C#CC([H])([H])[H])c1c([H])c([H])c2nc([H])nc(N([H])c3c([H])c([H])c([H])c(Br)c3[H])c2c1[H]	0 (Inactive)	0	0	0
79	PUBCHEM_CID_5053	[H]C(=C(C([H])([H])[H])C([H])([H])[H])[C@@]1([H])[C@@]([H])(C(=O)OC([H])([H])c2c([H])oc(c2[H])C([H])([H])c2c([H])c([H])c([H])c([H])c2[H])C1(C([H])([H])[H])C([H])([H])[H]	0 (Inactive)	0	0	0
80	PUBCHEM_CID_5284639	[H]Oc1c([H])c([H])c(c([H])c1[H])-c1c([H])oc2c([H])c(O[C@@]3([H])O[C@@]([H])(C([H])([H])O[H])[C@]([H])(O[H])[C@@]([H])(O[H])[C@]3([H])O[H])c([H])c(O[H])c2c1=O	0 (Inactive)	0	0	0
81	PUBCHEM_CID_5329255	[H]Oc1c([H])c([H])c(\C([H])=C(/C#N)C(=O)N([H])C([H])([H])C([H])([H])C([H])([H])N([H])C(=O)C(\C#N)=C(/[H])c2c([H])c([H])c(O[H])c(O[H])c2[H])c([H])c1O[H]	0 (Inactive)	0	0	0
82	PUBCHEM_CID_5368	[H]c1nc(nc([H])c1[H])C([H])([H])Oc1nc([H])c([H])c2c(-c3c([H])c(OC([H])([H])[H])c(OC([H])([H])[H])c(OC([H])([H])[H])c3[H])c(C(=O)OC([H])([H])[H])n(c(=O)c12)C([H])([H])c1c([H])c([H])nc(c1[H])C([H])([H])[H]	0 (Inactive)	1	0	1
83	PUBCHEM_CID_2753	[H]c1c([H])c2n([H])c(=O)c([H])c([H])c2c([H])c1OC([H])([H])C([H])([H])C([H])([H])C(=O)N(C([H])([H])[H])C1([H])C([H])([H])C([H])([H])C([H])([H])C([H])([H])C1([H])[H]	0 (Inactive)	0	0	0
84	PUBCHEM_CID_135179	[H]c1nc([H])c2n([H])c(nc2c1[H])-c1c([H])c([H])c(SC([H])([H])[H])c([H])c1OC([H])([H])[H]	0 (Inactive)	0	0	0
85	PUBCHEM_CID_9885087	[H]N1C(=O)C(=C(c2c([H])c([H])c(OC([H])([H])[H])c([H])c2[H])c2c([H])c([H])c(OC([H])([H])[H])c([H])c2[H])c2c([H])c([H])c([H])c([H])c12	0 (Inactive)	0	0	0
86	PUBCHEM_CID_10109069	[H]OC(=O)c1c([H])c([H])c(Cl)c([H])c1N([H])C(=O)N([H])c1c([H])c([H])c([H])c(c1[H])C(F)(F)F	0 (Inactive)	0	0	0
87	PUBCHEM_CID_55690	[H]c1nc([H])c2n([H])c(nc2c1[H])-c1c([H])c([H])c(c([H])c1OC([H])([H])[H])[S@@](=O)C([H])([H])[H]	0 (Inactive)	0	0	0
88	PUBCHEM_CID_23748533	[H]O[S@@+](c1c([H])c([H])c(c([H])c1[H])C([H])([H])Sc1nc(c(n1[H])-c1c([H])c([H])nc([H])c1[H])-c1c([H])c([H])c(F)c([H])c1[H])C([H])([H])[H]	0 (Inactive)	0	0	0
89	PUBCHEM_CID_23806679	[H]OC([H])([H])[C@]1([H])O[C@]([H])(n2c([H])nc3c(nc([H])nc23)N([H])[H])[C@@]([H])(S[H])[C@@]1([H])O[H]	0 (Inactive)	0	0	0
90	PUBCHEM_CID_44483227	[H]Oc1c([H])c([H])c(O[H])c(c1[H])N(C([H])([H])[H])[N+]([H])([H])[O-]	0 (Inactive)	0	0	0
91	PUBCHEM_CID_2064	[H]Oc1c([H])c([H])c(O[H])c(c1[H])C([H])([H])N([H])c1c([H])c([H])c(c([H])c1[H])C(=O)OC([H])([H])[H]	0 (Inactive)	0	0	0
92	PUBCHEM_CID_5328771	[H]Oc1c([H])c([H])c(\C([H])=C(/C#N)C(=O)N([H])c2c([H])c([H])c([H])c([H])c2[H])c([H])c1O[H]	0 (Inactive)	0	0	0
93	PUBCHEM_CID_1694	[H]n1nc2c(Br)c(Br)c(Br)c(Br)c2n1	0 (Inactive)	0	0	0
95	PUBCHEM_CID_6364616	[H]O[C@@]1(\C([H])=C([H])\OC(=O)O[C@@]23C(=O)N([H])[C@]([H])(C([H])([H])c4c([H])c([H])c([H])c([H])c4[H])[C@@]2([H])[C@]([H])(C([H])([H])[H])[C@@]2(O[C@]2([H])[C@]3([H])\C([H])=C([H])\C([H])([H])[C@@]([H])(C1=O)C([H])([H])[H])C([H])([H])[H])C([H])([H])[H]	0 (Inactive)	0	0	0
96	PUBCHEM_CID_263976	[H]OC([H])([H])[C@]1([H])O[C@]([H])(n2c([H])nc3c(nc([H])nc23)N([H])[H])C([H])([H])C1([H])[H]	0 (Inactive)	0	0	0
97	PUBCHEM_CID_5289419	[H]N1C(=O)\C(=C(\[H])c2c([H])nc([H])n2[H])c2c([H])c(OC([H])([H])[H])c([H])c([H])c12	0 (Inactive)	0	0	0
98	PUBCHEM_CID_37783	[H]OC([H])([H])C1=C([H])[C@@]2([H])[C@@]3([H])[C@@](OC(=O)C([H])([H])C([H])([H])C([H])([H])[H])([C@]([H])(OC(=O)C([H])([H])C([H])([H])C([H])([H])[H])[C@@]([H])(C([H])([H])[H])[C@]2(O[H])[C@]2([H])C([H])=C(C(=O)[C@@]2(O[H])C1([H])[H])C([H])([H])[H])C3(C([H])([H])[H])C([H])([H])[H]	0 (Inactive)	0	0	0
99	PUBCHEM_CID_4879	[H]N([H])c1nc([H])nc2n(nc([H])c12)-c1c([H])c([H])c([H])c([H])c1[H]	0 (Inactive)	0	0	0
100	PUBCHEM_CID_5328760	[H]Oc1c([H])c([H])c(\C([H])=C(/C#N)C(=O)c2c([H])c([H])c(O[H])c(O[H])c2[H])c([H])c1O[H]	0 (Inactive)	0	0	0
101	PUBCHEM_CID_125519	[H]Oc1c([H])c([H])c2oc(c([H])c(=O)c2c1[H])-c1c([H])c([H])c(N([H])[H])c([H])c1[H]	0 (Inactive)	0	0	0
102	PUBCHEM_CID_2400	[H]c1n([H])c2c([H])c([H])c([H])c([H])c2c1C1=C(C(=O)N(C1=O)C([H])([H])[H])c1c([H])n([H])c2c([H])c([H])c([H])c([H])c12	0 (Inactive)	0	0	0
103	PUBCHEM_CID_4314	[H]N([H])C([H])([H])C([H])([H])C([H])([H])C([H])([H])C([H])([H])C([H])([H])N([H])S(=O)(=O)c1c([H])c([H])c([H])c2c([H])c([H])c([H])c([H])c12	0 (Inactive)	0	0	0
104	PUBCHEM_CID_224859	[H]O[C@]([H])(C([H])([H])c1c([H])c([H])nc([H])c1[H])C(Cl)(Cl)Cl	0 (Inactive)	0	0	0
105	PUBCHEM_CID_5330548	[H]c1c(n([H])c2c([H])c([H])c([H])c([H])c12)C(=O)c1c([H])c2c([H])c(OC(=O)C([H])([H])C([H])([H])C([H])([H])[H])c([H])c([H])c2n1[H]	0 (Inactive)	0	0	0
106	PUBCHEM_CID_1172104	[H]N(C(=O)C([H])([H])Sc1nnc2c(c([H])c3c([H])c(OC([H])([H])[H])c([H])c([H])c3n12)C([H])([H])[H])c1c([H])c([H])c([H])c(c1[H])C(=O)C([H])([H])[H]	0 (Inactive)	0	0	0
107	PUBCHEM_CID_448912	[H]Oc1c([H])c([H])c(c([H])c1[H])-c1n([H])c2nc([H])c([H])nc2c1C([H])([H])C([H])([H])C([H])([H])C([H])([H])[H]	0 (Inactive)	0	0	0
108	PUBCHEM_CID_4534086	[H]N=C(SC([H])([H])C([H])([H])c1c([H])c([H])c(OC([H])([H])c2c([H])c([H])c(c([H])c2[H])[N+]([O-])=O)c([H])c1[H])N([H])[H]	0 (Inactive)	0	0	0
109	PUBCHEM_CID_9860529	[H]c1c([H])c([H])c2c(c1[H])c([H])c([H])c1c2oc(c([H])c1=O)N1C([H])([H])C([H])([H])OC([H])([H])C1([H])[H]	0 (Inactive)	0	0	0
111	PUBCHEM_CID_1474853	[H]N(c1nc([H])nc2c([H])c(OC([H])([H])[H])c(OC([H])([H])[H])c([H])c12)c1c([H])c([H])c(Oc2c([H])c([H])c([H])c([H])c2[H])c([H])c1[H]	0 (Inactive)	0	0	0
112	PUBCHEM_CID_5353376	[H]OC(=O)c1c([H])c([H])c([H])c([H])c1N([H])C(=O)C(\[H])=C(/[H])c1c([H])c([H])c(c([H])c1[H])C([H])([H])C([H])([H])C([H])([H])C([H])([H])C([H])([H])[H]	0 (Inactive)	0	0	0
113	PUBCHEM_CID_23806119	[H]OC([H])([H])[C@]1([H])O[C@]([H])(n2c([H])nc3c([H])c(Cl)c(Cl)c([H])c23)[C@@]([H])(O[H])[C@@]1([H])O[H]	0 (Inactive)	0	0	0
114	PUBCHEM_CID_9843206	[H]N(c1nc([H])nc2c([H])c(OC([H])([H])[H])c(OC([H])([H])[H])c([H])c12)c1c([H])c([H])c(OC([H])([H])c2c([H])c([H])c([H])c([H])c2[H])c([H])c1[H]	0 (Inactive)	0	0	0
115	PUBCHEM_CID_3641059	[H]c1nc2n([H])c(c(c2nc1[H])C([H])([H])C([H])([H])C([H])([H])C([H])([H])[H])-c1c([H])c([H])c(OC([H])([H])[H])c([H])c1[H]	0 (Inactive)	0	0	0
116	PUBCHEM_CID_5472558	[H]N1C(=O)\C(=C(/[H])c2c(Cl)n([H])c3c([H])c([H])c([H])c([H])c23)c2c([H])c([H])c([H])c([H])c12	0 (Inactive)	0	0	0
117	PUBCHEM_CID_2729027	[H]O[C@@]([H])(C([H])([H])N1C([H])([H])C([H])([H])N([H])C([H])([H])C1([H])[H])C([H])([H])n1c2c([H])c([H])c(Br)c([H])c2c2c([H])c(Br)c([H])c([H])c12	0 (Inactive)	0	0	0
118	PUBCHEM_CID_5228	[H]c1nc([H])c([H])c(c1[H])-c1c(nc2SC([H])([H])C([H])([H])n12)-c1c([H])c([H])c(F)c([H])c1[H]	0 (Inactive)	0	0	0
119	PUBCHEM_CID_4970	[H]c1c([H])c2c(c3OC([H])([H])Oc13)C([H])([H])N(C([H])([H])[H])C([H])([H])C([H])([H])c1c([H])c3OC([H])([H])Oc3c([H])c1C(=O)C2([H])[H]	0 (Inactive)	0	0	0
120	PUBCHEM_CID_24058669	[H]O[C@]1(C([H])([H])C([H])([H])[H])C([H])([H])[N@@]2C([H])([H])[C@]([H])(C1([H])[H])C([H])([H])[C@@](C(=O)OC([H])([H])[H])(c1n([H])c3c([H])c([H])c([H])c([H])c3c1C([H])([H])C2([H])[H])c1c([H])c2c(c([H])c1OC([H])([H])[H])N(C([H])=O)[C@]1([H])[C@]22C([H])([H])C([H])([H])N3C([H])([H])C([H])=C([H])[C@@](C([H])([H])C([H])([H])[H])([C@@]23[H])[C@@]([H])(OC(=O)C([H])([H])[H])[C@]1(O[H])C(=O)OC([H])([H])…	0 (Inactive)	0	0	1
121	PUBCHEM_CID_32875	[H]Oc1c2C(=O)c3c([H])c([H])c([H])c(OC([H])([H])[H])c3C(=O)c2c(O[H])c2c1C([H])([H])[C@@](O[H])(C(=O)C([H])([H])O[H])C([H])([H])[C@]2([H])O[C@]1([H])O[C@]([H])(C([H])([H])[H])[C@@]([H])(O[H])[C@]([H])(N([H])[H])C1([H])[H]	0 (Inactive)	0	0	0
122	PUBCHEM_CID_25035942	[H]N(c1c([H])c([H])c(c([H])c1[H])C(c1c([H])c([H])c(c([H])c1[H])C(c1c([H])c([H])c([H])c(N([H])S(=O)(=O)C(F)(F)F)c1[H])(C([H])([H])[H])C([H])([H])[H])(C([H])([H])[H])C([H])([H])[H])S(=O)(=O)C(F)(F)F	0 (Inactive)	0	0	0
123	PUBCHEM_CID_1733	[H]c1nc(c(C#N)c2c([H])c([H])c([H])c([H])c12)C([H])([H])[H]	0 (Inactive)	0	0	0
124	PUBCHEM_CID_1901244	[H]c1c([H])c([H])c2C(=O)C(=O)N(c2c1[H])C([H])([H])c1c([H])c([H])c(Cl)c(Cl)c1[H]	0 (Inactive)	0	0	0
125	PUBCHEM_CID_448014	[H]N(C(=O)N([H])C([H])([H])c1c([H])c([H])c(OC([H])([H])[H])c([H])c1[H])c1nc([H])c(s1)[N+]([O-])=O	0 (Inactive)	0	0	0
126	PUBCHEM_CID_23863209	[H]O[C@]1([H])C([H])([H])[C@@]([H])(O[C@]1([H])C([H])([H])[H])n1c([H])nc2c(nc([H])nc12)N([H])[H]	0 (Inactive)	0	0	0
128	PUBCHEM_CID_3277	[H]N(N=C(C([H])([H])[H])C([H])([H])[H])c1c(c([H])nc2n(nc([H])c12)C([H])([H])C([H])([H])[H])C(=O)OC([H])([H])C([H])([H])[H]	0 (Inactive)	0	0	0
129	PUBCHEM_CID_5174	[H]c1nc([H])c([H])c(c1[H])-c1oc(nc1-c1c([H])c([H])c([H])c([H])c1[H])C([H])([H])[H]	0 (Inactive)	0	0	0
130	PUBCHEM_CID_16760634	[H]N(C(=O)N([H])c1c(Cl)c([H])c(Cl)c([H])c1Cl)c1c([H])c([H])nc([H])c1[H]	0 (Inactive)	0	0	0
131	PUBCHEM_CID_2984	[H]c1nc2n(c(=O)n(c(=O)c2n1C([H])([H])C(=O)C([H])([H])[H])C([H])([H])C([H])([H])C([H])([H])C([H])([H])[H])C([H])([H])C([H])([H])C([H])([H])C([H])([H])[H]	0 (Inactive)	0	0	0
132	PUBCHEM_CID_13817	[H]OS(=O)(=O)c1c([H])c(\N=N\c2c([H])c([H])c(c([H])c2C([H])([H])[H])-c2c([H])c([H])c(\N=N\c3c([H])c(c4c([H])c([H])c([H])c([H])c4c3N([H])[H])S(=O)(=O)O[H])c(c2[H])C([H])([H])[H])c(N([H])[H])c2c([H])c([H])c([H])c([H])c12	0 (Inactive)	0	0	0
133	PUBCHEM_CID_134141	[H]c1c([H])c([H])c2N(c3c([H])c(c([H])c([H])c3Sc2c1[H])C(F)(F)F)C([H])([H])C([H])([H])C([H])([H])N1C([H])([H])C([H])([H])N(C([H])([H])C([H])([H])Cl)C([H])([H])C1([H])[H]	0 (Inactive)	0	0	0
134	PUBCHEM_CID_4299	[H]N([H])C([H])([H])C([H])([H])C([H])([H])C([H])([H])N([H])S(=O)(=O)c1c([H])c([H])c2c(Cl)c([H])c([H])c([H])c2c1[H]	0 (Inactive)	0	0	0
136	PUBCHEM_CID_9871875	[H]O[C@]1([H])[C@]([H])(OC(=O)C([H])([H])C([H])([H])C([H])([H])N2C([H])([H])C([H])([H])N(C([H])([H])[H])C([H])([H])C2([H])[H])[C@]2(O[C@](C([H])=C([H])[H])(C([H])([H])[H])C([H])([H])C(=O)[C@]2(O[H])[C@@]2(C([H])([H])[H])[C@@]([H])(O[H])C([H])([H])C([H])([H])C(C([H])([H])[H])(C([H])([H])[H])[C@]12[H])C([H])([H])[H]	0 (Inactive)	0	0	0
137	PUBCHEM_CID_9795867	[H]N(C(=O)[C@@]([H])(C#N)C(=O)C([H])([H])[H])c1c([H])c([H])c(OC(F)(F)F)c([H])c1[H]	0 (Inactive)	0	0	0
138	PUBCHEM_CID_73293	[H]c1c([H])c([H])c-2c(c1[H])C(=O)c1[n+]-2c([H])c([H])c2c1n([H])c1c([H])c([H])c([H])c([H])c21	0 (Inactive)	0	0	0
139	PUBCHEM_CID_9926586	[H]N(C(=O)C(C([H])([H])[H])(C([H])([H])[H])C([H])([H])[H])c1c([H])c([H])c2-c3c([H])c([H])c([H])c([H])c3C(=O)C(=O)c2c1[H]	0 (Inactive)	0	0	0
140	PUBCHEM_CID_11210285	[H]N([H])c1nc(N([H])C([H])([H])c2c([H])c([H])c3OC([H])([H])Oc3c2[H])c([H])c(n1)-c1c([H])c([H])c([H])c(OC([H])([H])[H])c1[H]	0 (Inactive)	0	0	0
141	PUBCHEM_CID_5329468	[H]c1nn2c([H])c(c([H])nc2c1-c1c([H])sc([H])c1[H])-c1c([H])c([H])c(OC([H])([H])[H])c([H])c1[H]	0 (Inactive)	0	0	0
142	PUBCHEM_CID_3012	[H]c1sc2nc(c(c(=O)n2c1[H])C([H])([H])C([H])([H])N1C([H])([H])C([H])([H])C(=C(c2c([H])c([H])c([H])c([H])c2[H])c2c([H])c([H])c(F)c([H])c2[H])C([H])([H])C1([H])[H])C([H])([H])[H]	0 (Inactive)	0	0	0
143	PUBCHEM_CID_657356	[H]c1c([H])c([H])c2c(c1[H])n([H])c(=S)n(c2=O)C([H])([H])C([H])([H])N1C([H])([H])C([H])([H])C(=C(c2c([H])c([H])c(F)c([H])c2[H])c2c([H])c([H])c(F)c([H])c2[H])C([H])([H])C1([H])[H]	0 (Inactive)	0	0	0
144	PUBCHEM_CID_1234	[H]c1c([H])c(c([H])c(OC([H])([H])[H])c1OC([H])([H])[H])C([H])([H])C([H])([H])N(C([H])([H])[H])C([H])([H])C([H])([H])C([H])([H])[C@](C#N)(c1c([H])c(OC([H])([H])[H])c(OC([H])([H])[H])c(OC([H])([H])[H])c1[H])C([H])(C([H])([H])[H])C([H])([H])[H]	0 (Inactive)	0	0	0
145	PUBCHEM_CID_1713	[H]N(c1nc([H])nc2c([H])c([H])c(OC([H])([H])[H])c([H])c12)C([H])([H])c1c([H])c([H])c2OC([H])([H])Oc2c1[H]	0 (Inactive)	0	0	0
146	PUBCHEM_CID_3815	[H]N1C(=O)c2c(c3c4c([H])c([H])c([H])c([H])c4n([H])c3c3n([H])c4c([H])c([H])c([H])c([H])c4c23)C1([H])[H]	0 (Inactive)	0	0	0
147	PUBCHEM_CID_3160258	[H]Oc1n([H])c2c([H])c([H])c([H])c([H])c2c1\C([H])=N\c1c([H])c([H])c(c([H])c1[H])S(=O)(=O)N([H])[H]	0 (Inactive)	0	0	0
148	PUBCHEM_CID_3467590	[H]OC(=O)c1c([H])c([H])c2c3nc4c([H])c([H])c([H])c([H])c4n3c(=O)c3c([H])c([H])c([H])c1c23	0 (Inactive)	0	0	0
149	PUBCHEM_CID_9549289	[H]Oc1c([H])c([H])c([H])c(Oc2nc([H])nc3n([H])c(c([H])c23)-c2c([H])c([H])c([H])c(N([H])[H])c2[H])c1[H]	0 (Inactive)	0	0	0
150	PUBCHEM_CID_72332	[H]O[C@](C(=O)O[C@]1([H])C(OC([H])([H])[H])=C([H])[C@@]23N(C([H])([H])C([H])([H])C2([H])[H])C([H])([H])C([H])([H])c2c([H])c4OC([H])([H])Oc4c([H])c2[C@@]13[H])(C([H])([H])C(=O)OC([H])([H])[H])C([H])([H])C([H])([H])C([H])([H])C(O[H])(C([H])([H])[H])C([H])([H])[H]	0 (Inactive)	0	0	0
151	PUBCHEM_CID_5175	[H]N(C([H])([H])C([H])([H])C([H])([H])C([H])([H])C([H])([H])C([H])([H])C([H])([H])[H])S(=O)(=O)c1c([H])c([H])c([H])c2c(Cl)c([H])c([H])c([H])c12	0 (Inactive)	0	0	0
152	PUBCHEM_CID_1533	[H]N([H])c1nc([H])c([H])c(c1[H])C([H])([H])[H]	0 (Inactive)	0	0	0
153	PUBCHEM_CID_4362	[H]C1=C([H])C(=O)N(C1=O)C([H])([H])C([H])([H])[H]	0 (Inactive)	0	0	0
154	PUBCHEM_CID_2832	[H]N(C([H])([H])[H])[C@@]1([H])c2c([H])c(=O)c(OC([H])([H])[H])c([H])c([H])c2-c2c(OC([H])([H])[H])c(OC([H])([H])[H])c(OC([H])([H])[H])c([H])c2C([H])([H])C1([H])[H]	0 (Inactive)	0	0	0
155	PUBCHEM_CID_290486	[H]OC([H])([H])[C@]1([H])O[C@@]([H])(n2c([H])c3c(nn(c4nc([H])nc2c34)C([H])([H])[H])N([H])[H])[C@]([H])(O[H])[C@@]1([H])O[H]	0 (Inactive)	0	0	0
156	PUBCHEM_CID_11003969	[H]c1c([H])c([H])c2c3c(n([H])c2c1[H])[C@@]([H])(N1C(=O)N(C(=O)[C@@]1([H])C3([H])[H])C([H])([H])C([H])([H])C([H])([H])C([H])([H])[H])c1c([H])c([H])c(OC([H])([H])[H])c([H])c1[H]	0 (Inactive)	0	0	0
157	PUBCHEM_CID_403994	[H]Oc1c([H])c([H])c2oc3nc([H])c(C(=O)OC([H])([H])C([H])([H])[H])c(-c4c([H])c([H])c([H])c([H])c4[H])c3c2c1[H]	0 (Inactive)	0	0	0
158	PUBCHEM_CID_6604931	[H]OC([H])([H])[C@]([H])(N([H])c1nc(N([H])c2c([H])c(Cl)c([H])c(N([H])[H])c2[H])c2nc([H])n(c2n1)C([H])(C([H])([H])[H])C([H])([H])[H])C([H])(C([H])([H])[H])C([H])([H])[H]	0 (Inactive)	0	0	0
159	PUBCHEM_CID_5687	[H]Oc1c([H])c([H])c([H])c(N([H])c2nc([H])nc3c([H])c(OC([H])([H])[H])c(OC([H])([H])[H])c([H])c23)c1[H]	0 (Inactive)	0	0	0
160	PUBCHEM_CID_25044204	[H]N([C@@]([H])(C(=O)C([H])([H])Cl)C([H])([H])c1c([H])c([H])c([H])c([H])c1[H])S(=O)(=O)c1c([H])c([H])c(c([H])c1[H])C([H])([H])[H]	0 (Inactive)	0	0	0
161	PUBCHEM_CID_2052	[H]Oc1c([H])c([H])c(C([H])=C(C#N)C#N)c([H])c1O[H]	0 (Inactive)	0	0	0
162	PUBCHEM_CID_2061	[H]Oc1c([H])c(C([H])=C(C#N)C#N)c([H])c(O[H])c1O[H]	0 (Inactive)	0	0	0
163	PUBCHEM_CID_5328807	[H]Oc1c([H])c(\C([H])=C(/C#N)C(N([H])[H])=C(C#N)C#N)c([H])c(O[H])c1O[H]	0 (Inactive)	0	0	0
164	PUBCHEM_CID_2051	[H]N(c1c([H])c([H])c([H])c(Cl)c1[H])c1nc([H])nc2c([H])c(OC([H])([H])[H])c(OC([H])([H])[H])c([H])c12	0 (Inactive)	0	0	0
165	PUBCHEM_CID_2048	[H]c1c([H])c([H])c(c([H])c1[H])-c1nc2c([H])c(c(c([H])c2nc1[H])C([H])([H])[H])C([H])([H])[H]	0 (Inactive)	0	0	0
166	PUBCHEM_CID_3003565	[H]c1oc2c3c1C(=O)O[C@]([H])(C([H])([H])OC([H])([H])[H])[C@@]3(C1=C(C2=O)[C@@]2([H])C([H])([H])C([H])([H])C(=O)[C@@]2(C([H])([H])[H])C([H])([H])[C@@]1([H])OC(=O)C([H])([H])[H])C([H])([H])[H]	0 (Inactive)	0	0	0
167	PUBCHEM_CID_3663	[H]Oc1c([H])c(O[H])c2c3c(O[H])c([H])c(O[H])c4c(O[H])c5c6c(c(c([H])c5=O)C([H])([H])[H])c5c(c([H])c(=O)c7c(O[H])c1c2c(c57)c6c34)C([H])([H])[H]	0 (Inactive)	0	0	0
168	PUBCHEM_CID_3540	[H]N(C([H])([H])[H])C([H])([H])C([H])([H])N([H])S(=O)(=O)c1c([H])c([H])c([H])c2c([H])nc([H])c([H])c12	0 (Inactive)	0	0	0
169	PUBCHEM_CID_3547	[H]N1C([H])([H])C([H])([H])N(C([H])([H])C([H])([H])C1([H])[H])S(=O)(=O)c1c([H])c([H])c([H])c2c([H])nc([H])c([H])c12	0 (Inactive)	0	0	0
170	PUBCHEM_CID_5312122	[H]OC([H])([H])C([H])([H])N(c1c([H])c([H])c([H])c([H])c1C([H])([H])N(C([H])([H])[H])C([H])([H])C([H])=C([H])c1c([H])c([H])c(Cl)c([H])c1[H])S(=O)(=O)c1c([H])c([H])c(OC([H])([H])[H])c([H])c1[H]	0 (Inactive)	0	0	0
171	PUBCHEM_CID_512292	[H]OC([H])([H])C([H])([H])N([H])c1nc(N([H])C([H])([H])c2c([H])c([H])c([H])c([H])c2[H])c2n(c([H])nc2n1)C([H])([H])[H]	0 (Inactive)	0	0	0
172	PUBCHEM_CID_5941539	[H]Oc1c(c([H])c(\C([H])=C(/C#N)C(=O)N([H])C([H])([H])C([H])([H])C([H])([H])c2c([H])c([H])c([H])c([H])c2[H])c([H])c1C([H])(C([H])([H])[H])C([H])([H])[H])C([H])(C([H])([H])[H])C([H])([H])[H]	0 (Inactive)	0	0	0
173	PUBCHEM_CID_3799	[H]C([H])=C([H])C(=O)c1c([H])c([H])c2c([H])c([H])c([H])c([H])c2c1[H]	0 (Inactive)	0	0	0
174	PUBCHEM_CID_448042	[H]N([H])[C@]([H])(C([H])([H])[H])[C@@]1([H])C([H])([H])C([H])([H])[C@]([H])(C(=O)N([H])c2c([H])c([H])nc([H])c2[H])C([H])([H])C1([H])[H]	0 (Inactive)	0	0	0
175	PUBCHEM_CID_3820	[H]N1c2c([H])c([H])c([H])c([H])c2-c2n([H])c3c([H])c([H])c(Br)c([H])c3c2C([H])([H])C1=O	0 (Inactive)	0	0	0
176	PUBCHEM_CID_44483234	[H]C([H])([H])[C@]1([H])C(=O)C(=O)[C@]2([H])O[C@]2([H])C1=O	0 (Inactive)	0	0	0
177	PUBCHEM_CID_5280443	[H]Oc1c([H])c([H])c(c([H])c1[H])-c1oc2c([H])c(O[H])c([H])c(O[H])c2c(=O)c1[H]	0 (Inactive)	0	0	0
178	PUBCHEM_CID_16045442	[H]C#Cc1c([H])c([H])c([H])c(N([H])c2nc([H])nc3c([H])c(OC([H])([H])[H])c(OC([H])([H])[H])c([H])c23)c1[H]	0 (Inactive)	0	0	0
179	PUBCHEM_CID_2948	[H]Oc1c([H])c2C(=O)c3c([H])c([H])c([H])c([H])c3C(=O)c2c(OC([H])([H])[H])c1C([H])=O	0 (Inactive)	0	0	0
180	PUBCHEM_CID_5712	[H]OC([H])([H])c1oc(c([H])c1[H])-c1nn(c2c([H])c([H])c([H])c([H])c12)C([H])([H])c1c([H])c([H])c([H])c([H])c1[H]	0 (Inactive)	0	0	0
181	PUBCHEM_CID_31703	[H]Oc1c2C(=O)c3c([H])c([H])c([H])c(OC([H])([H])[H])c3C(=O)c2c(O[H])c2c1C([H])([H])[C@@](O[H])(C(=O)C([H])([H])O[H])C([H])([H])[C@]2([H])O[C@]1([H])O[C@@]([H])(C([H])([H])[H])[C@@]([H])(O[H])[C@@]([H])(N([H])[H])C1([H])[H]	0 (Inactive)	0	0	0
182	PUBCHEM_CID_6610268	[H]c1c([H])c2c([H])c([H])c1Oc1c([H])c(c([H])c([H])c1OC(=O)c1c([H])c([H])c(c([H])c1[H])[N+]([O-])=O)C([H])([H])[C@@]1([H])N(C([H])([H])[H])C([H])([H])C([H])([H])c3c([H])c(OC([H])([H])[H])c(OC([H])([H])[H])c(Oc4c([H])c5c(c([H])c4OC([H])([H])[H])C([H])([H])C([H])([H])N(C([H])([H])[H])[C@@]5([H])C2([H])[H])c13	0 (Inactive)	0	0	0
183	PUBCHEM_CID_4495	[H]N(c1c([H])c([H])c(c([H])c1Oc1c([H])c([H])c([H])c([H])c1[H])[N+]([O-])=O)S(=O)(=O)C([H])([H])[H]	0 (Inactive)	0	0	0
184	PUBCHEM_CID_3544	[H]N([H])C([H])([H])C([H])([H])N([H])S(=O)(=O)c1c([H])c([H])c([H])c2c([H])nc([H])c([H])c12	0 (Inactive)	0	0	0
185	PUBCHEM_CID_3568	[H]Oc1c([H])c(c(c(O[H])c1O[H])-c1c(O[H])c(O[H])c(O[H])c([H])c1C([H])([H])OC([H])([H])[H])C([H])([H])OC([H])([H])[H]	0 (Inactive)	0	0	0
186	PUBCHEM_CID_3715	[H]OC(=O)C([H])([H])c1c(n(C(=O)c2c([H])c([H])c(Cl)c([H])c2[H])c2c([H])c([H])c(OC([H])([H])[H])c([H])c12)C([H])([H])[H]	0 (Inactive)	0	0	0
187	PUBCHEM_CID_92970	[H]Oc1c([H])c([H])c(C([H])=C(C#N)C#N)c([H])c1[H]	0 (Inactive)	0	0	0
188	PUBCHEM_CID_2987927	[H]Oc1c([H])c([H])c([H])c(c1[H])[C@]1([H])N([H])C(=S)N([H])C(=C1C(=O)OC([H])([H])C([H])([H])[H])C([H])([H])[H]	0 (Inactive)	0	0	0
189	PUBCHEM_CID_4122	[H]N(C(=O)OC([H])([H])[H])c1nc2c([H])c([H])c(c([H])c2n1[H])C(=O)c1sc([H])c([H])c1[H]	0 (Inactive)	0	0	0
190	PUBCHEM_CID_4592	[H]OC([H])([H])C([H])([H])N([H])c1nc(N([H])C([H])([H])c2c([H])c([H])c([H])c([H])c2[H])c2nc([H])n(c2n1)C([H])([H])[H]	0 (Inactive)	0	0	0
191	PUBCHEM_CID_289840	[H]OC([H])([H])[C@]12[C@]([H])(O[H])C([H])([H])[C@]([H])(O[C@@]3([H])O[C@]([H])(C([H])([H])[H])[C@@]([H])(O[H])[C@]([H])(O[H])[C@@]3([H])O[H])C([H])([H])[C@@]1(O[H])C([H])([H])C([H])([H])[C@]1([H])[C@]2([H])[C@]([H])(O[H])C([H])([H])[C@]2(C([H])([H])[H])[C@@]([H])(C3=C([H])C(=O)OC3([H])[H])C([H])([H])C([H])([H])[C@]12O[H]	0 (Inactive)	0	0	0
192	PUBCHEM_CID_4713	[H]N([H])c1c(OC([H])([H])[H])c([H])c([H])c([H])c1-c1oc2c([H])c([H])c([H])c([H])c2c(=O)c1[H]	0 (Inactive)	0	0	0
193	PUBCHEM_CID_5478883	[H]OC(=O)C([H])([H])[C@]([H])(O[H])[C@@]([H])(N([H])C(=O)[C@@]([H])(N([H])C(=O)C([H])([H])[C@]([H])(O[H])[C@@]([H])(N([H])C(=O)[C@@]([H])(N([H])C(=O)[C@@]([H])(N([H])C(=O)C([H])([H])C([H])(C([H])([H])[H])C([H])([H])[H])C([H])(C([H])([H])[H])C([H])([H])[H])C([H])(C([H])([H])[H])C([H])([H])[H])C([H])([H])C([H])(C([H])([H])[H])C([H])([H])[H])C([H])([H])[H])C([H])([H])C([H])(C([H])([H])[H])C([H])([H]…	0 (Inactive)	0	0	0
194	PUBCHEM_CID_1853	[H]c1c([H])c([H])c2c(c1[H])n([H])c(=O)c1c([H])c([H])c([H])c([H])c21	0 (Inactive)	0	0	0
196	PUBCHEM_CID_9600409	[H]\C(=N/OC([H])([H])c1c([H])c([H])c(Cl)c(Cl)c1[H])c1c(nc2sc([H])c([H])n12)-c1c([H])c([H])c(Cl)c([H])c1[H]	0 (Inactive)	0	0	0
197	PUBCHEM_CID_9880620	[H]N(C(=O)[C@@]1([H])N(C([H])([H])[H])S(=O)(=O)c2c([H])c([H])c([H])c([H])c2C1=O)c1nc([H])c([H])c([H])c1[H]	0 (Inactive)	0	0	0
198	PUBCHEM_CID_4893	[H]N([H])c1nc(nc2c([H])c(OC([H])([H])[H])c(OC([H])([H])[H])c([H])c12)N1C([H])([H])C([H])([H])N(C(=O)c2oc([H])c([H])c2[H])C([H])([H])C1([H])[H]	0 (Inactive)	0	0	0
199	PUBCHEM_CID_91536	[H]O[C@]([H])(C([H])([H])Oc1c([H])c([H])c([H])c2c([H])c([H])c([H])c([H])c12)C([H])([H])N([H])C([H])(C([H])([H])[H])C([H])([H])[H]	0 (Inactive)	0	0	0
200	PUBCHEM_CID_2724365	[H]OC([H])([H])[C@@]1([H])O[C@@]([H])(n2c([H])nc3c(nc([H])nc23)N(C([H])([H])[H])C([H])([H])[H])[C@]([H])(O[H])[C@]1([H])N([H])C(=O)[C@]([H])(N([H])[H])C([H])([H])c1c([H])c([H])c(OC([H])([H])[H])c([H])c1[H]	0 (Inactive)	0	0	0
201	PUBCHEM_CID_8515	[H]c1c([H])c([H])c2C(=O)c3c([H])c([H])c([H])c4n([H])nc(-c2c1[H])c34	0 (Inactive)	0	0	0
202	PUBCHEM_CID_5280343	[H]Oc1c([H])c(O[H])c2c(oc(-c3c([H])c([H])c(O[H])c(O[H])c3[H])c(O[H])c2=O)c1[H]	0 (Inactive)	0	0	0
203	PUBCHEM_CID_44634703	[H]O[C@]1([H])C([H])([H])C([H])([H])[C@@]([H])(C([H])([H])[C@@]([H])(C([H])([H])[H])[C@@]2([H])OC(=O)[C@@]3([H])N(C(=O)C(=O)[C@]4(O[H])O[C@@]([H])(C([H])([H])C([H])([H])[C@@]4([H])C([H])([H])[H])C([H])([H])[C@]([H])(OC([H])([H])[H])\C(=C(\[H])/C(/[H])=C(\[H])/C(/[H])=C([H])/[C@@]([H])(C([H])([H])[H])C([H])([H])[C@]([H])(C(=O)[C@]([H])(OC([H])([H])[H])[C@]([H])(O[H])C(=C([H])[C@]([H])(C(=O)C2([H])…	0 (Inactive)	0	0	0
204	PUBCHEM_CID_6610347	[H]OC(=O)C([H])([H])[C@@]1([H])N([H])C(=O)C([H])([H])N([H])C(=O)[C@@]([H])(N([H])C(=O)[C@@]([H])(N([H])C(=O)[C@@]([H])(N([H])C1=O)C([H])([H])c1c([H])c([H])c([H])c([H])c1[H])C([H])(C([H])([H])[H])C([H])([H])[H])C([H])([H])C([H])([H])C([H])([H])N=C(N([H])[H])N([H])[H]	0 (Inactive)	0	0	0
205	PUBCHEM_CID_5063	[H]N(C(=O)ON=C1C([H])([H])C([H])([H])C([H])([H])C([H])([H])C1([H])[H])C([H])([H])C([H])([H])C([H])([H])C([H])([H])C([H])([H])C([H])([H])N([H])C(=O)ON=C1C([H])([H])C([H])([H])C([H])([H])C([H])([H])C1([H])[H]	0 (Inactive)	0	0	0
206	PUBCHEM_CID_160355	[H]OC([H])([H])[C@]([H])(N([H])c1nc(N([H])C([H])([H])c2c([H])c([H])c([H])c([H])c2[H])c2nc([H])n(c2n1)C([H])(C([H])([H])[H])C([H])([H])[H])C([H])([H])C([H])([H])[H]	0 (Inactive)	0	0	0
207	PUBCHEM_CID_176155	[H]c1nc([H])c([H])c(c1[H])-c1n([H])c(nc1-c1c([H])c([H])c(F)c([H])c1[H])-c1c([H])c([H])c(c([H])c1[H])[S@@](=O)C([H])([H])[H]	0 (Inactive)	0	0	0
208	PUBCHEM_CID_10177	[H]Oc1n([H])c2c([H])c([H])c([H])c([H])c2c1C1=Nc2c([H])c([H])c([H])c([H])c2C1=O	0 (Inactive)	0	0	0
209	PUBCHEM_CID_4878	[H]N([H])c1nc([H])nc2n(nc(-c3c([H])c([H])c(Cl)c([H])c3[H])c12)C(C([H])([H])[H])(C([H])([H])[H])C([H])([H])[H]	0 (Inactive)	0	0	0
210	PUBCHEM_CID_5270	[H]N([H])c1nc([H])nc2n(c([H])nc12)[C@@]1([H])OC([H])([H])C([H])([H])C1([H])[H]	0 (Inactive)	0	0	0
212	PUBCHEM_CID_2733526	[H]c1c([H])c([H])c(c([H])c1[H])C(=C(\c1c([H])c([H])c([H])c([H])c1[H])C([H])([H])C([H])([H])[H])\c1c([H])c([H])c(OC([H])([H])C([H])([H])N(C([H])([H])[H])C([H])([H])[H])c([H])c1[H]	0 (Inactive)	0	0	0
213	PUBCHEM_CID_441276	[H]O[C@@]([H])(C(=O)O[C@]1([H])C(=C2[C@@]([H])(OC(=O)C([H])([H])[H])C(=O)[C@]3(C([H])([H])[H])[C@@]([H])(O[H])C([H])([H])[C@@]4([H])OC([H])([H])[C@@]4(OC(=O)C([H])([H])[H])[C@@]3([H])[C@]([H])(OC(=O)c3c([H])c([H])c([H])c([H])c3[H])[C@](O[H])(C1([H])[H])C2(C([H])([H])[H])C([H])([H])[H])C([H])([H])[H])[C@@]([H])(N([H])C(=O)c1c([H])c([H])c([H])c([H])c1[H])c1c([H])c([H])c([H])c([H])c1[H]	0 (Inactive)	0	0	0
214	PUBCHEM_CID_5926218	[H]\C(=C(\C#N)c1c([H])nc([H])c([H])c1[H])c1c([H])c(Cl)c([H])c(Cl)c1[H]	0 (Inactive)	0	0	0
215	PUBCHEM_CID_5426	[H]N1C(=O)C([H])([H])C([H])([H])[C@@]([H])(N2C(=O)c3c([H])c([H])c([H])c([H])c3C2=O)C1=O	0 (Inactive)	0	0	0
216	PUBCHEM_CID_5369129	[H]\C(=C(\[H])[C@]1([H])OC(=O)C([H])=C(OC([H])([H])[H])C1([H])[H])c1c([H])c([H])c([H])c([H])c1[H]	0 (Inactive)	0	0	0
217	PUBCHEM_CID_5519	[H]c1nc(c([H])c([H])c1[H])C([H])([H])N(C([H])([H])c1nc([H])c([H])c([H])c1[H])C([H])([H])C([H])([H])N(C([H])([H])c1nc([H])c([H])c([H])c1[H])C([H])([H])c1nc([H])c([H])c([H])c1[H]	0 (Inactive)	0	0	0
218	PUBCHEM_CID_5614	[H]Oc1c(c([H])c(C([H])=C(C#N)C#N)c([H])c1C(C([H])([H])[H])(C([H])([H])[H])C([H])([H])[H])C(C([H])([H])[H])(C([H])([H])[H])C([H])([H])[H]	0 (Inactive)	0	0	0
219	PUBCHEM_CID_5681	[H]N([H])C([H])([H])C([H])([H])C([H])([H])C([H])([H])C([H])([H])C([H])([H])N([H])S(=O)(=O)c1c([H])c([H])c([H])c2c(Cl)c([H])c([H])c([H])c12	0 (Inactive)	0	0	0
220	PUBCHEM_CID_312145	[H]c1oc2c3c1C(=O)O[C@]([H])(C([H])([H])OC([H])([H])[H])[C@@]3(C1=C(C2=O)[C@]2([H])C([H])([H])C([H])([H])C(=O)[C@@]2(C([H])([H])[H])C([H])([H])[C@@]1([H])OC(=O)C([H])([H])[H])C([H])([H])[H]	0 (Inactive)	0	0	0
221	PUBCHEM_CID_8969	[H]O[C@@]1([H])C([H])([H])C([H])([H])[C@@]2([H])C([H])([H])N3C([H])([H])C([H])([H])c4c(n([H])c5c([H])c([H])c([H])c([H])c45)[C@]3([H])C([H])([H])[C@]2([H])[C@@]1([H])C(=O)OC([H])([H])[H]	0 (Inactive)	0	0	0
222	PUBCHEM_CID_5497183	[H]N(C(=O)OC([H])([H])c1c([H])c([H])c([H])c([H])c1[H])[C@]([H])(C(=O)N([H])[C@]([H])(C(=O)N([H])[C@]([H])(C([H])=C([H])S(=O)(=O)C([H])([H])[H])C([H])([H])C([H])(C([H])([H])[H])C([H])([H])[H])C([H])([H])C([H])(C([H])([H])[H])C([H])([H])[H])C([H])([H])C([H])(C([H])([H])[H])C([H])([H])[H]	0 (Inactive)	0	0	0
223	PUBCHEM_CID_4553	[H]N(c1c([H])c([H])c(c([H])c1OC1([H])C([H])([H])C([H])([H])C([H])([H])C([H])([H])C1([H])[H])[N+]([O-])=O)S(=O)(=O)C([H])([H])[H]	0 (Inactive)	0	0	0
224	PUBCHEM_CID_1845	[H]c1c(Cl)c(Cl)c([H])c2n([H])c(=O)c(=O)n([H])c12	0 (Inactive)	0	0	0
225	PUBCHEM_CID_183470	[H]c1c([H])c(c([H])c(Cl)c1Cl)C(=O)N(C([H])([H])[H])[C@]1([H])C([H])([H])C([H])([H])C([H])([H])C([H])([H])[C@]1([H])N1C([H])([H])C([H])([H])C([H])([H])C1([H])[H]	0 (Inactive)	0	0	0
226	PUBCHEM_CID_6604749	[H]OC(=O)[C@]1([H])N([H])c2c([H])c(Cl)c([H])c(Cl)c2[C@@]([H])(N([H])C(=O)N([H])c2c([H])c([H])c([H])c([H])c2[H])C1([H])[H]	0 (Inactive)	0	0	0
227	PUBCHEM_CID_5013	[H]c1c([H])c([H])c2c([H])c([H])c(nc2c1[H])N1C([H])([H])C([H])([H])N(C([H])([H])[H])C([H])([H])C1([H])[H]	0 (Inactive)	0	0	0
229	PUBCHEM_CID_2689	[H]c1c([H])c2c(nc3c([H])c(c([H])c([H])c3n2c1[H])C(F)(F)F)N1C([H])([H])C([H])([H])N(C([H])([H])[H])C([H])([H])C1([H])[H]	0 (Inactive)	0	0	0
230	PUBCHEM_CID_9419	[H]c1c([H])c([H])c2N(C(=O)c3c([H])c([H])c([H])c([H])c3N(c2c1[H])C([H])([H])[H])C([H])([H])C([H])([H])N(C([H])([H])[H])C([H])([H])[H]	0 (Inactive)	0	0	0
231	PUBCHEM_CID_127404	[H]O[C@@]([H])(C([H])([H])Oc1c([H])c([H])c([H])c([H])c1-n1c([H])c([H])c([H])c1[H])C([H])([H])N([H])C([H])(C([H])([H])[H])C([H])([H])[H]	0 (Inactive)	0	0	0
232	PUBCHEM_CID_3994476	[H]c1c([H])c([H])c(N2C([H])([H])C([H])([H])N(C([H])([H])C([H])([H])C([H])([H])C([H])([H])N3C(=O)C([H])([H])C([H])([H])C3=O)C([H])([H])C2([H])[H])c(OC([H])([H])[H])c1[H]	0 (Inactive)	0	0	0
233	PUBCHEM_CID_4205	[H]c1nc2N3C([H])([H])C([H])([H])N(C([H])([H])[H])C([H])([H])[C@]3([H])c3c([H])c([H])c([H])c([H])c3C([H])([H])c2c([H])c1[H]	0 (Inactive)	0	0	0
234	PUBCHEM_CID_4284720	[H]N([H])[C@]([H])(C([H])([H])[H])C([H])([H])c1c([H])n([H])c2c([H])c([H])c(OC([H])([H])c3sc([H])c([H])c3[H])c([H])c12	0 (Inactive)	0	0	0
235	PUBCHEM_CID_4184	[H]c1c([H])c([H])c2c(c1[H])N1C([H])([H])C([H])([H])N(C([H])([H])[H])C([H])([H])[C@@]1([H])c1c([H])c([H])c([H])c([H])c1C2([H])[H]	0 (Inactive)	0	0	0
236	PUBCHEM_CID_2771	[H]c1c([H])c(C#N)c([H])c2c1[C@](OC2([H])[H])(c1c([H])c([H])c(F)c([H])c1[H])C([H])([H])C([H])([H])C([H])([H])N(C([H])([H])[H])C([H])([H])[H]	0 (Inactive)	0	0	0
237	PUBCHEM_CID_3272300	[H]c1n([H])c2c([H])c([H])c([H])c([H])c2c1C(=O)OC([H])([H])C([H])([H])N1C([H])([H])C([H])([H])C([H])([H])C([H])([H])C1([H])[H]	0 (Inactive)	0	0	0
238	PUBCHEM_CID_156314	[H]N([H])C(=O)c1c([H])c([H])c2n([H])c([H])c(c2c1[H])C([H])([H])C([H])([H])N(C([H])([H])C([H])([H])C([H])([H])[H])C([H])([H])C([H])([H])C([H])([H])[H]	0 (Inactive)	0	0	0
239	PUBCHEM_CID_636403	[H]OC(=O)C([H])([H])C([H])([H])C(=O)O[C@@]1([H])C([H])([H])C([H])([H])[C@]2(C([H])([H])[H])[C@@]3([H])C(=O)C([H])=C4[C@]5([H])C([H])([H])[C@](C(=O)O[H])(C([H])([H])[H])C([H])([H])C([H])([H])[C@]5(C([H])([H])[H])C([H])([H])C([H])([H])[C@@]4(C([H])([H])[H])[C@]3(C([H])([H])[H])C([H])([H])C([H])([H])[C@@]2([H])C1(C([H])([H])[H])C([H])([H])[H]	0 (Inactive)	0	0	0
240	PUBCHEM_CID_54459	[H]N1C(=NC([H])([H])C1([H])[H])[C@]1([H])Oc2c([H])c([H])c([H])c([H])c2OC1([H])[H]	0 (Inactive)	0	0	0
241	PUBCHEM_CID_23874512	[H]OP1(=O)OC([H])([H])[C@]2([H])[C@]([H])(O[C@@]([H])(n3c([H])nc4c(nc([H])nc34)N([H])C(=O)C([H])([H])C([H])([H])C([H])([H])[H])[C@]2([H])OC(=O)C([H])([H])C([H])([H])C([H])([H])[H])O1	0 (Inactive)	0	0	0
242	PUBCHEM_CID_3960	[H]OC(=O)C([H])([H])C([H])([H])[C@@]([H])(N([H])C(=O)c1c([H])c([H])c(Cl)c(Cl)c1[H])C(=O)N(C([H])([H])C([H])([H])C([H])([H])C([H])([H])C([H])([H])[H])C([H])([H])C([H])([H])C([H])([H])C([H])([H])C([H])([H])[H]	0 (Inactive)	0	0	0
243	PUBCHEM_CID_2356	[H]Oc1c([H])c2C(=O)O[C@@]3([H])[C@]([H])(O[C@@]([H])(C([H])([H])O[H])[C@@]([H])(O[H])[C@@]3([H])O[H])c2c(O[H])c1OC([H])([H])[H]	0 (Inactive)	0	0	0
244	PUBCHEM_CID_5332	[H]N([H])c1c([H])c([H])c(c([H])c1[H])S(=O)(=O)N([H])c1nc([H])nc(OC([H])([H])[H])c1[H]	0 (Inactive)	0	0	0
245	PUBCHEM_CID_6338099	[H]C1=C2C([H])=C([H])[C@@]3([H])N4C([H])([H])C([H])([H])C([H])([H])C([H])([H])[C@]4([H])[C@]2(OC1=O)C3([H])[H]	0 (Inactive)	0	0	0
246	PUBCHEM_CID_4411	[H]O[C@@]([H])(C([H])([H])Oc1c([H])c([H])c([H])c2c1C([H])([H])[C@@]([H])(O[H])[C@]([H])(O[H])C2([H])[H])C([H])([H])N([H])C(C([H])([H])[H])(C([H])([H])[H])C([H])([H])[H]	0 (Inactive)	0	0	0
247	PUBCHEM_CID_8982	[H]OC(=O)[C@]1([H])N2C(=O)[C@@]([H])(N([H])C(=O)c3c(OC([H])([H])C([H])([H])[H])c([H])c([H])c4c([H])c([H])c([H])c([H])c34)[C@@]2([H])SC1(C([H])([H])[H])C([H])([H])[H]	0 (Inactive)	0	0	0
248	PUBCHEM_CID_4919	[H]O[C@](c1c([H])c([H])c([H])c([H])c1[H])(C([H])([H])C([H])([H])N1C([H])([H])C([H])([H])C([H])([H])C1([H])[H])C1([H])C([H])([H])C([H])([H])C([H])([H])C([H])([H])C1([H])[H]	0 (Inactive)	0	0	0
249	PUBCHEM_CID_5318	[H]c1nc([H])n(c1[H])C([H])([H])[C@]([H])(SC([H])([H])c1c([H])c([H])c(Cl)c([H])c1[H])c1c([H])c([H])c(Cl)c([H])c1Cl	0 (Inactive)	0	0	0
250	PUBCHEM_CID_5359	[H]OC(=O)[C@]([H])(c1c([H])c([H])c(c([H])c1[H])C(=O)c1sc([H])c([H])c1[H])C([H])([H])[H]	0 (Inactive)	0	0	0
251	PUBCHEM_CID_5920	[H]OC(=O)[C@@]([H])(N([H])[H])C([H])([H])c1c([H])c(I)c(Oc2c([H])c([H])c(O[H])c(I)c2[H])c(I)c1[H]	0 (Inactive)	0	0	0
252	PUBCHEM_CID_5509	[H]OC(=O)C([H])([H])c1c([H])c([H])c(C(=O)c2c([H])c([H])c(c([H])c2[H])C([H])([H])[H])n1C([H])([H])[H]	0 (Inactive)	0	0	0
253	PUBCHEM_CID_39468	[H]O[C@]([H])(C([H])([H])Oc1c([H])c([H])c([H])c2C(=O)C([H])([H])C([H])([H])C([H])([H])c12)C([H])([H])N([H])C(C([H])([H])[H])(C([H])([H])[H])C([H])([H])[H]	0 (Inactive)	0	0	0
254	PUBCHEM_CID_54454	[H]O[C@@]1([H])C([H])([H])C(=O)O[C@]([H])(C([H])([H])C([H])([H])[C@@]2([H])[C@]([H])(C([H])=C([H])C3=C([H])[C@]([H])(C([H])([H])[H])C([H])([H])[C@]([H])(OC(=O)C(C([H])([H])[H])(C([H])([H])[H])C([H])([H])C([H])([H])[H])[C@]23[H])C([H])([H])[H])C1([H])[H]	0 (Inactive)	0	0	0
255	PUBCHEM_CID_5353831	[H]N(\C(N([H])C([H])([H])C([H])([H])SC([H])([H])c1nc(sc1[H])C([H])([H])N(C([H])([H])[H])C([H])([H])[H])=C(/[H])[N+]([O-])=O)C([H])([H])[H]	0 (Inactive)	0	0	0
256	PUBCHEM_CID_223368	[H]Oc1c([H])c([H])c2c(c1[H])C([H])([H])C([H])=C1[C@]3([H])C([H])([H])C([H])([H])C(=O)[C@@]3(C([H])([H])[H])C([H])([H])C([H])([H])[C@]21[H]	0 (Inactive)	0	0	0
257	PUBCHEM_CID_4500	[H]N(C([H])([H])[H])C([H])([H])C([H])([H])[C@]([H])(Oc1c([H])c([H])c([H])c([H])c1OC([H])([H])[H])c1c([H])c([H])c([H])c([H])c1[H]	0 (Inactive)	0	0	0
258	PUBCHEM_CID_6713984	[H]N(C(=S)N1C([H])([H])C([H])([H])C([H])(C([H])([H])C1([H])[H])[C@@]1([H])N=C([H])N=C1[H])C1([H])C([H])([H])C([H])([H])C([H])([H])C([H])([H])C1([H])[H]	0 (Inactive)	0	0	0
259	PUBCHEM_CID_6291	[H]O[C@@]1(C#C[H])C([H])([H])C([H])([H])[C@@]2([H])[C@]3([H])C([H])([H])C([H])([H])c4c([H])c(OC([H])([H])[H])c([H])c([H])c4[C@@]3([H])C([H])([H])C([H])([H])[C@]12C([H])([H])[H]	0 (Inactive)	0	0	0
260	PUBCHEM_CID_4806	[H]OC(=O)c1c([H])c([H])c([H])c([H])c1C(=O)N([H])c1c([H])c([H])c(c([H])c1[H])S(=O)(=O)N([H])c1nc([H])c([H])s1	0 (Inactive)	0	0	0
261	PUBCHEM_CID_2480	[H]N([H])c1c([H])c([H])c(c([H])c1[H])C(=O)OC([H])([H])C([H])([H])C([H])([H])N(C([H])([H])C([H])([H])C([H])([H])C([H])([H])[H])C([H])([H])C([H])([H])C([H])([H])C([H])([H])[H]	0 (Inactive)	0	0	0
262	PUBCHEM_CID_21700	[H]O[C@@]1([H])C([H])([H])[C@@]2(C([H])([H])[H])[C@@]([H])(C([H])([H])[C@]([H])(C([H])([H])[H])[C@]2(OC(=O)C([H])([H])C([H])([H])[H])C(=O)C([H])([H])OC(=O)C([H])([H])C([H])([H])[H])[C@]2([H])C([H])([H])C([H])([H])C3=C([H])C(=O)C([H])=C([H])[C@]3(C([H])([H])[H])[C@@]12Cl	0 (Inactive)	0	0	0
263	PUBCHEM_CID_2343	[H]N([H])S(=O)(=O)c1c([H])c2c(N([H])C(=NS2(=O)=O)C([H])([H])SC([H])([H])c2c([H])c([H])c([H])c([H])c2[H])c([H])c1Cl	0 (Inactive)	0	0	0
264	PUBCHEM_CID_1203	[H]Oc1c([H])c(O[H])c2c(O[C@]([H])(c3c([H])c([H])c(O[H])c(O[H])c3[H])[C@@]([H])(O[H])C2([H])[H])c1[H]	0 (Inactive)	0	0	0
265	PUBCHEM_CID_25295	[H]c1nc(c([H])c([H])c1[H])N(C([H])([H])c1c([H])c([H])c(Cl)c([H])c1[H])C([H])([H])C([H])([H])N(C([H])([H])[H])C([H])([H])[H]	0 (Inactive)	0	0	0
266	PUBCHEM_CID_3718	[H]OC(=O)[C@]([H])(c1c([H])c([H])c(c([H])c1[H])N1C(=O)c2c([H])c([H])c([H])c([H])c2C1([H])[H])C([H])([H])[H]	0 (Inactive)	0	0	0
267	PUBCHEM_CID_5560	[H]N([H])S(=O)(=O)c1c([H])c2c(N([H])[C@]([H])(N([H])S2(=O)=O)C([H])(Cl)Cl)c([H])c1Cl	0 (Inactive)	0	0	0
268	PUBCHEM_CID_3157	[H]N([H])c1nc(nc2c([H])c(OC([H])([H])[H])c(OC([H])([H])[H])c([H])c12)N1C([H])([H])C([H])([H])N(C(=O)[C@@]2([H])Oc3c([H])c([H])c([H])c([H])c3OC2([H])[H])C([H])([H])C1([H])[H]	0 (Inactive)	0	0	0
269	PUBCHEM_CID_1548972	[H]OC(=O)C([H])([H])[C@@]([H])(O[H])C([H])([H])[C@@]([H])(O[H])C(\[H])=C(/[H])c1c(-c2c([H])c([H])c(F)c([H])c2[H])c2c([H])c([H])c([H])c([H])c2n1C([H])(C([H])([H])[H])C([H])([H])[H]	0 (Inactive)	0	0	0
270	PUBCHEM_CID_5460339	[H]O[C@@]([H])(C([H])([H])Oc1c([H])c([H])c([H])c2C(=O)C([H])([H])C([H])([H])C([H])([H])c12)C([H])([H])N([H])C(C([H])([H])[H])(C([H])([H])[H])C([H])([H])[H]	0 (Inactive)	0	0	0
271	PUBCHEM_CID_23846567	[H]O[C@@]1([H])[C@]([H])(O[C@]2([H])[C@@]([H])(C([H])([H])[H])[C@]([H])(O[C@@]3([H])O[C@@]([H])(C([H])([H])[H])[C@]([H])(O[H])[C@@](OC([H])([H])[H])(C([H])([H])[H])C3([H])[H])[C@]([H])(C(=O)O[C@]([H])(C([H])([H])C([H])([H])[H])[C@](O[H])(C([H])([H])[H])[C@]([H])(O[H])[C@]([H])(\C(=N\OC([H])([H])OC([H])([H])C([H])([H])OC([H])([H])[H])[C@]([H])(C([H])([H])[H])C([H])([H])[C@]2(O[H])C([H])([H])[H])C(…	0 (Inactive)	0	0	0
272	PUBCHEM_CID_3280	[H]c1nc(c2c([H])c(OC([H])([H])C([H])([H])[H])c(OC([H])([H])C([H])([H])[H])c([H])c2c1[H])C([H])([H])c1c([H])c([H])c(OC([H])([H])C([H])([H])[H])c(OC([H])([H])C([H])([H])[H])c1[H]	0 (Inactive)	0	0	0
273	PUBCHEM_CID_3000322	[H]OC([H])([H])[C@@]([H])(C(=O)O[C@]1([H])C([H])([H])[C@]2([H])N(C([H])([H])[H])[C@]([H])(C1([H])[H])[C@@]1([H])O[C@@]21[H])c1c([H])c([H])c([H])c([H])c1[H]	0 (Inactive)	0	0	0
274	PUBCHEM_CID_2153	[H]c1nc2n(c(=O)n(c(=O)c2n1[H])C([H])([H])[H])C([H])([H])[H]	0 (Inactive)	0	0	0
275	PUBCHEM_CID_5323714	[H]\C(=N/N1C(=O)OC([H])([H])C1([H])[H])c1oc(c([H])c1[H])[N+]([O-])=O	0 (Inactive)	0	0	0
276	PUBCHEM_CID_3038	[H]N([H])S(=O)(=O)c1c([H])c(Cl)c(Cl)c(c1[H])S(=O)(=O)N([H])[H]	0 (Inactive)	0	0	0
277	PUBCHEM_CID_44246711	[H]Oc1c([H])c([H])c([H])c2c1C(=O)[C@]1([H])C(=O)[C@@]3(O[H])C(=O)[C@@]([H])(C(=O)N([H])[H])C(=O)[C@@]([H])(N(C([H])([H])[H])C([H])([H])[H])[C@]3([H])[C@@]([H])(O[H])[C@]1([H])[C@@]2([H])C([H])([H])[H]	0 (Inactive)	0	0	0
278	PUBCHEM_CID_175540	[H]O[C@]([H])(C([H])([H])Oc1c([H])c([H])c(c([H])c1[H])C([H])([H])C(=O)N([H])[H])C([H])([H])N([H])C([H])(C([H])([H])[H])C([H])([H])[H]	0 (Inactive)	0	0	0
279	PUBCHEM_CID_27648	[H]OC(=O)[C@@]([H])(C([H])([H])[H])C([H])([H])N(C(=O)C([H])([H])[H])c1c(I)c([H])c(I)c(N([H])[H])c1I	0 (Inactive)	0	0	0
280	PUBCHEM_CID_77553	[H]c1c([H])c([H])c2c([H])c(C(=O)C([H])([H])[H])c(=O)oc2c1[H]	0 (Inactive)	0	0	0
281	PUBCHEM_CID_5281607	[H]Oc1c([H])c(O[H])c2c(oc(c([H])c2=O)-c2c([H])c([H])c([H])c([H])c2[H])c1[H]	0 (Inactive)	0	0	0
282	PUBCHEM_CID_15558439	[H]Oc1c([H])c2oc(=O)c([H])c([H])c2c([H])c1O[C@]1([H])O[C@]([H])(C([H])([H])O[H])[C@@]([H])(O[H])[C@]([H])(O[H])[C@@]1([H])O[H]	0 (Inactive)	0	0	0
283	PUBCHEM_CID_4977	[H]O[C@@]([H])(C([H])([H])[H])C([H])([H])n1c([H])nc2n(c(=O)n(c(=O)c12)C([H])([H])[H])C([H])([H])[H]	0 (Inactive)	0	0	0
284	PUBCHEM_CID_689043	[H]OC(=O)C(\[H])=C(/[H])c1c([H])c([H])c(O[H])c(O[H])c1[H]	0 (Inactive)	0	0	0
285	PUBCHEM_CID_5281416	[H]Oc1c([H])c2oc(=O)c([H])c([H])c2c([H])c1O[H]	0 (Inactive)	0	0	0
286	PUBCHEM_CID_223997	[H]C1=C2C([H])([H])C([H])([H])[C@@]3([H])[C@]4([H])C([H])([H])C([H])([H])C(=O)[C@@]4(C([H])([H])[H])C([H])([H])C(=O)[C@]3([H])[C@@]2(C([H])([H])[H])C([H])([H])C([H])([H])C1=O	0 (Inactive)	0	0	0
287	PUBCHEM_CID_2310	[H]N1C(=O)C([H])([H])C(C([H])([H])[H])(C([H])([H])C([H])([H])[H])C([H])([H])C1=O	0 (Inactive)	0	0	0
288	PUBCHEM_CID_14709	[H]C1=C2C([H])([H])[C@@]([H])(OC(=O)C([H])([H])[H])C([H])([H])C([H])([H])[C@]2(C([H])([H])[H])[C@@]2([H])C([H])([H])C([H])([H])[C@@]3(C(=O)C([H])([H])C([H])([H])[C@@]3([H])[C@]2([H])C1([H])[H])C([H])([H])[H]	0 (Inactive)	0	0	0
289	PUBCHEM_CID_6166	[H]OC([H])([H])C(=O)[C@@]1([H])C([H])([H])C([H])([H])[C@@]2([H])[C@]3([H])C([H])([H])C([H])([H])C4=C([H])C(=O)C([H])([H])C([H])([H])[C@]4(C([H])([H])[H])[C@@]3([H])C([H])([H])C([H])([H])[C@]12C([H])([H])[H]	0 (Inactive)	0	0	0
290	PUBCHEM_CID_15478	[H]O[C@@]1([H])C([H])([H])C([H])([H])[C@@]2(C([H])([H])[H])[C@]([H])(C([H])([H])C([H])([H])[C@]3([H])[C@]2([H])C([H])([H])[C@@]([H])(O[H])[C@]2(C([H])([H])[H])[C@@]([H])(C4=C([H])C(=O)OC4([H])[H])C([H])([H])C([H])([H])[C@]32O[H])C1([H])[H]	0 (Inactive)	0	0	0
291	PUBCHEM_CID_114811	[H]O[C@]([H])(c1c([H])c([H])c(c([H])c1[H])S(=O)(=O)C([H])([H])[H])[C@]([H])(N([H])C(=O)C([H])(Cl)Cl)C([H])([H])F	0 (Inactive)	0	0	0
292	PUBCHEM_CID_659840	[H]O[C@]1([H])C([H])([H])C([H])([H])C([H])([H])C([H])([H])[C@@]1([H])N1C([H])([H])C([H])([H])C([H])(c2c([H])c([H])c([H])c([H])c2[H])C([H])([H])C1([H])[H]	0 (Inactive)	0	0	0
293	PUBCHEM_CID_11683	[H]C1=C2C(=C([H])[C@@]3([H])[C@]4([H])C([H])([H])C([H])([H])[C@](OC(=O)C([H])([H])[H])(C(=O)C([H])([H])[H])[C@@]4(C([H])([H])[H])C([H])([H])C([H])([H])[C@]3([H])[C@@]2(C([H])([H])[H])C([H])([H])C([H])([H])C1=O)C([H])([H])[H]	0 (Inactive)	0	0	0
294	PUBCHEM_CID_70912	[H]OC(=O)[C@@]([H])(N([H])C(=O)C([H])([H])[H])C([H])([H])C([H])(C([H])([H])[H])C([H])([H])[H]	0 (Inactive)	0	0	0
296	PUBCHEM_CID_4976	[H]N(C([H])([H])[H])C([H])([H])C([H])([H])C([H])([H])C1([H])c2c([H])c([H])c([H])c([H])c2C([H])=C([H])c2c([H])c([H])c([H])c([H])c12	0 (Inactive)	0	0	0
297	PUBCHEM_CID_39912	[H]OC(=O)[C@]([H])(c1c([H])c([H])c(c([H])c1[H])C([H])([H])C([H])(C([H])([H])[H])C([H])([H])[H])C([H])([H])[H]	0 (Inactive)	0	0	0
298	PUBCHEM_CID_33624	[H]O[C@]([H])(C([H])([H])Oc1nsnc1N1C([H])([H])C([H])([H])OC([H])([H])C1([H])[H])C([H])([H])N([H])C(C([H])([H])[H])(C([H])([H])[H])C([H])([H])[H]	0 (Inactive)	0	0	0
299	PUBCHEM_CID_4831	[H]OC(=O)c1c([H])n(c2nc(nc([H])c2c1=O)N1C([H])([H])C([H])([H])N([H])C([H])([H])C1([H])[H])C([H])([H])C([H])([H])[H]	0 (Inactive)	0	0	0
300	PUBCHEM_CID_2123	[H]C([H])([H])N(c1nc(nc(n1)N(C([H])([H])[H])C([H])([H])[H])N(C([H])([H])[H])C([H])([H])[H])C([H])([H])[H]	0 (Inactive)	0	0	0
301	PUBCHEM_CID_7184	[H]Oc1c([H])c([H])c(c([H])c1[H])C(=O)OC([H])([H])C([H])([H])C([H])([H])C([H])([H])[H]	0 (Inactive)	0	0	0
302	PUBCHEM_CID_2788	[H]Oc1c(I)c([H])c(Cl)c2c([H])c([H])c([H])nc12	0 (Inactive)	0	0	0
303	PUBCHEM_CID_688020	[H]\C(=C(\[H])C([H])([H])[H])C(=O)N(c1c([H])c([H])c([H])c([H])c1C([H])([H])[H])C([H])([H])C([H])([H])[H]	0 (Inactive)	0	0	0
304	PUBCHEM_CID_19529	[H]c1oc(c([H])c1[H])C(=O)Oc1c([H])c([H])c(c([H])c1[H])N(C(=O)C([H])(Cl)Cl)C([H])([H])[H]	0 (Inactive)	0	0	0
305	PUBCHEM_CID_3394	[H]OC(=O)[C@@]([H])(c1c([H])c([H])c(c(F)c1[H])-c1c([H])c([H])c([H])c([H])c1[H])C([H])([H])[H]	0 (Inactive)	0	0	0
306	PUBCHEM_CID_5280567	[H]Oc1c([H])c([H])c2c(c([H])c(=O)oc2c1[H])C([H])([H])[H]	0 (Inactive)	0	0	0
307	PUBCHEM_CID_3739	[H]OC(=O)c1c(I)c([H])c(I)c(N([H])C(=O)C([H])([H])C([H])([H])C([H])([H])C([H])([H])C(=O)N([H])c2c(I)c([H])c(I)c(C(=O)O[H])c2I)c1I	0 (Inactive)	0	0	0
308	PUBCHEM_CID_3826	[H]OC(=O)[C@@]1([H])c2c([H])c([H])c(C(=O)c3c([H])c([H])c([H])c([H])c3[H])n2C([H])([H])C1([H])[H]	0 (Inactive)	0	0	0
309	PUBCHEM_CID_4174	[H]c1nc([H])c(c([H])c1[H])C(=O)C(c1c([H])nc([H])c([H])c1[H])(C([H])([H])[H])C([H])([H])[H]	0 (Inactive)	0	0	0
310	PUBCHEM_CID_4409	[H]c1c([H])c2c([H])c(c([H])c([H])c2c([H])c1OC([H])([H])[H])C([H])([H])C([H])([H])C(=O)C([H])([H])[H]	0 (Inactive)	0	0	0
312	PUBCHEM_CID_4935	[H]N([H])c1c([H])c(c([H])c([H])c1OC([H])([H])C([H])([H])C([H])([H])[H])C(=O)OC([H])([H])C([H])([H])N(C([H])([H])C([H])([H])[H])C([H])([H])C([H])([H])[H]	0 (Inactive)	0	0	0
313	PUBCHEM_CID_6337640	[H]N1[C@]2([H])c3c([H])c([H])c([H])c([H])c3[C@]1(c1c([H])c([H])c([H])c([H])c1C2([H])[H])C([H])([H])[H]	0 (Inactive)	0	0	0
314	PUBCHEM_CID_4946	[H]O[C@]([H])(C([H])([H])Oc1c([H])c([H])c([H])c2c([H])c([H])c([H])c([H])c12)C([H])([H])N([H])C([H])(C([H])([H])[H])C([H])([H])[H]	0 (Inactive)	0	0	0
315	PUBCHEM_CID_43815	[H]N1C([H])([H])C([H])([H])[C@@]([H])(c2c([H])c([H])c(F)c([H])c2[H])[C@]([H])(C([H])([H])Oc2c([H])c([H])c3OC([H])([H])Oc3c2[H])C1([H])[H]	0 (Inactive)	0	0	0
316	PUBCHEM_CID_54892	[H]OC(=O)[C@@]1([H])N(C(=O)[C@@]([H])(N([H])[C@]([H])(C(=O)OC([H])([H])C([H])([H])[H])C([H])([H])C([H])([H])c2c([H])c([H])c([H])c([H])c2[H])C([H])([H])[H])C([H])([H])c2c([H])c([H])c([H])c([H])c2C1([H])[H]	0 (Inactive)	0	0	0
317	PUBCHEM_CID_5952	[H]C1=C2C([H])([H])C([H])([H])[C@@]3([H])[C@]4([H])C([H])([H])C([H])([H])[C@]([H])(C(=O)C([H])([H])OC(=O)C([H])([H])[H])[C@@]4(C([H])([H])[H])C([H])([H])C([H])([H])[C@]3([H])[C@@]2(C([H])([H])[H])C([H])([H])C([H])([H])C1=O	0 (Inactive)	0	0	0
318	PUBCHEM_CID_446284	[H]OC(=O)C([H])([H])C([H])([H])C([H])([H])C(\[H])=C(\[H])C([H])([H])C(\[H])=C(\[H])C([H])([H])C(\[H])=C(\[H])C([H])([H])C(\[H])=C(\[H])C([H])([H])C(\[H])=C(\[H])C([H])([H])C([H])([H])[H]	0 (Inactive)	0	0	0
319	PUBCHEM_CID_5283389	[H]OC(=O)C([H])([H])N([H])C(=O)C([H])([H])C([H])([H])C([H])([H])C(\[H])=C(/[H])C([H])([H])C(\[H])=C(\[H])C([H])([H])C(\[H])=C(\[H])C([H])([H])C(\[H])=C(\[H])C([H])([H])C([H])([H])C([H])([H])C([H])([H])C([H])([H])[H]	0 (Inactive)	0	0	0
321	PUBCHEM_CID_72378	[H]O[C@@]1([H])C([H])=C2C([H])([H])C([H])([H])N3C([H])([H])c4c([H])c5OC([H])([H])Oc5c([H])c4[C@@]([H])([C@@]23[H])[C@]1([H])O[H]	0 (Inactive)	0	0	0
322	PUBCHEM_CID_16760040	[H]O[C@]([H])(C([H])([H])C1([H])C([H])([H])C(=O)N([H])C(=O)C1([H])[H])[C@]1([H])C(=O)[C@@]([H])(C([H])([H])[H])C([H])([H])[C@]([H])(C([H])([H])[H])C1([H])[H]	0 (Inactive)	0	0	0
323	PUBCHEM_CID_15032	[H]O[C@]1([H])C([H])([H])C2=C([H])C([H])([H])[C@@]3([H])[C@]4([H])C([H])([H])[C@@]([H])(C#N)[C@]([H])(C(=O)C([H])([H])[H])[C@@]4(C([H])([H])[H])C([H])([H])C([H])([H])[C@]3([H])[C@@]2(C([H])([H])[H])C([H])([H])C1([H])[H]	0 (Inactive)	0	0	0
324	PUBCHEM_CID_1204	[H]N1[C@]2([H])C([H])([H])C([H])([H])[C@@]1([H])[C@]([H])(c1c([H])nc(Cl)c([H])c1[H])C2([H])[H]	0 (Inactive)	0	0	0
325	PUBCHEM_CID_5475158	[H]N(C(=O)C(\[H])=C(/[H])c1c([H])c([H])c([H])c([H])c1[H])c1c([H])c([H])c([H])c([H])c1SC([H])([H])C([H])([H])C([H])([H])N(C([H])([H])[H])C([H])([H])[H]	0 (Inactive)	0	0	0
326	PUBCHEM_CID_107992	[H]N1C([H])([H])C([H])([H])N(c2nc(Cl)c([H])nc2[H])C([H])([H])C1([H])[H]	0 (Inactive)	0	0	0
327	PUBCHEM_CID_9681	[H]OC([H])([H])[C@@]([H])(N([H])C(=O)[C@]1([H])C([H])=C2c3c([H])c([H])c([H])c4n(c([H])c(c34)C([H])([H])[C@@]2([H])N(C([H])([H])[H])C1([H])[H])C([H])([H])[H])C([H])([H])C([H])([H])[H]	0 (Inactive)	0	0	0
328	PUBCHEM_CID_5312145	[H]N([H])c1c([H])c([H])c(c([H])c1[H])S(=O)(=O)N([H])c1nc(nc(N([H])C([H])([H])[H])c1[H])N([H])C([H])([H])[H]	0 (Inactive)	0	0	0
331	PUBCHEM_CID_197835	[H]c1c([H])c(OC([H])([H])[H])c(OC([H])([H])[H])c2C(=O)O[C@@]([H])(c12)[C@]1([H])N(C([H])([H])[H])C([H])([H])C([H])([H])c2c([H])c3OC([H])([H])Oc3c([H])c12	0 (Inactive)	0	0	0
332	PUBCHEM_CID_96946	[H]O[C@@]([H])(c1c([H])c([H])c([H])c([H])c1[H])C([H])([H])[C@]1([H])N(C([H])([H])[H])[C@]([H])(C([H])([H])[C@]([H])(O[H])c2c([H])c([H])c([H])c([H])c2[H])C([H])([H])C([H])([H])C1([H])[H]	0 (Inactive)	0	0	0
333	PUBCHEM_CID_5281750	[H]O[C@]1(C(=O)OC([H])([H])C2=C([H])C([H])([H])N3C([H])([H])C([H])([H])[C@@]([H])(OC(=O)\C(=C(\[H])C([H])([H])[H])C([H])([H])C1=C([H])[H])[C@@]23[H])C([H])([H])[H]	0 (Inactive)	0	0	0
334	PUBCHEM_CID_5833	[H]C1=C2C([H])([H])[C@@]([H])(SC(=O)C([H])([H])[H])[C@@]3([H])[C@]4([H])C([H])([H])C([H])([H])[C@]5(OC(=O)C([H])([H])C5([H])[H])[C@@]4(C([H])([H])[H])C([H])([H])C([H])([H])[C@]3([H])[C@@]2(C([H])([H])[H])C([H])([H])C([H])([H])C1=O	0 (Inactive)	0	0	0
335	PUBCHEM_CID_5510	[H]c1c([H])c(c([H])c(c1[H])C([H])([H])[H])N(C(=S)Oc1c([H])c([H])c2c([H])c([H])c([H])c([H])c2c1[H])C([H])([H])[H]	0 (Inactive)	0	0	0
336	PUBCHEM_CID_6674	[H]OC(=O)C([H])([H])C([H])([H])[C@@]([H])(C([H])([H])[H])[C@@]1([H])C([H])([H])C([H])([H])[C@@]2([H])[C@]3([H])C(=O)C([H])([H])[C@]4([H])C([H])([H])C(=O)C([H])([H])C([H])([H])[C@]4(C([H])([H])[H])[C@@]3([H])C([H])([H])C(=O)[C@]12C([H])([H])[H]	0 (Inactive)	0	0	0
337	PUBCHEM_CID_5472	[H]c1sc2c(c1[H])C([H])([H])N(C([H])([H])c1c([H])c([H])c([H])c([H])c1Cl)C([H])([H])C2([H])[H]	0 (Inactive)	0	0	0
338	PUBCHEM_CID_44634698	[H]O[C@@]1([H])[C@]([H])(O[C@]2([H])[C@@]([H])(OC([H])([H])[H])[C@]([H])(OC(=O)C([H])([H])C([H])([H])[H])C([H])([H])C(=O)O[C@]([H])(C([H])([H])[H])C([H])([H])\C([H])=C([H])/C([H])=C([H])[C@@]([H])(O[H])[C@]([H])(C([H])([H])[H])C([H])([H])[C@]2([H])C([H])([H])C([H])=O)O[C@]([H])(C([H])([H])[H])[C@@]([H])(O[C@]2([H])O[C@@]([H])(C([H])([H])[H])[C@]([H])(OC(=O)C([H])([H])C([H])([H])[H])[C@@](O[H])(C(…	0 (Inactive)	0	0	0
339	PUBCHEM_CID_3291	[H]N1C(=O)C([H])([H])[C@@](C1=O)(C([H])([H])[H])C([H])([H])C([H])([H])[H]	0 (Inactive)	0	0	0
340	PUBCHEM_CID_5392245	[H]N1c2c([H])c([H])c([H])c([H])c2[C@@]23C([H])([H])C([H])([H])N(C([H])([H])[H])[C@]1([H])[C@@]21c2c([H])c([H])c([H])c([H])c2N([H])[C@]3([H])N(C([H])([H])[H])C([H])([H])C1([H])[H]	0 (Inactive)	0	0	0
341	PUBCHEM_CID_10140	[H]OC(=O)C([H])([H])N([H])C(=O)C([H])([H])C([H])([H])[C@@]([H])(C([H])([H])[H])[C@@]1([H])C([H])([H])C([H])([H])[C@@]2([H])[C@]3([H])[C@]([H])(O[H])C([H])([H])[C@]4([H])C([H])([H])[C@]([H])(O[H])C([H])([H])C([H])([H])[C@]4(C([H])([H])[H])[C@@]3([H])C([H])([H])[C@]([H])(O[H])[C@]12C([H])([H])[H]	0 (Inactive)	0	0	0
342	PUBCHEM_CID_54676537	[H]Oc1c(c(=O)oc2c([H])c([H])c([H])c([H])c12)[C@@]([H])(c1c([H])c([H])c(c([H])c1[H])[N+]([O-])=O)C([H])([H])C(=O)C([H])([H])[H]	0 (Inactive)	0	0	0
343	PUBCHEM_CID_5742673	[H]OC(=O)C1=C(C([H])([H])OC(=O)C([H])([H])[H])C([H])([H])S[C@@]2([H])N1C(=O)[C@@]2([H])N([H])C(=O)C(=N/OC([H])([H])[H])\c1nc(sc1[H])N([H])[H]	0 (Inactive)	0	0	0
344	PUBCHEM_CID_5284596	[H]Oc1c([H])c([H])c2c3c1O[C@@]1([H])C(=O)C([H])([H])C([H])([H])[C@@]4(O[H])[C@]([H])(N(C([H])([H])C([H])=C([H])[H])C([H])([H])C([H])([H])[C@]314)C2([H])[H]	0 (Inactive)	0	0	0
345	PUBCHEM_CID_4633	[H]N([H])c1c([H])c([H])c(c([H])c1OC([H])([H])C([H])([H])C([H])([H])C([H])([H])[H])C(=O)OC([H])([H])C([H])([H])N(C([H])([H])C([H])([H])[H])C([H])([H])C([H])([H])[H]	0 (Inactive)	0	0	0
346	PUBCHEM_CID_5501	[H]N(N([H])c1nnc([H])c2c([H])c([H])c([H])c([H])c12)C(=O)OC([H])([H])C([H])([H])[H]	0 (Inactive)	0	0	0
347	PUBCHEM_CID_107751	[H]N(C(=O)[C@@]([H])(C([H])([H])SC(=O)C([H])([H])[H])C([H])([H])c1c([H])c([H])c([H])c([H])c1[H])C([H])([H])C(=O)OC([H])([H])c1c([H])c([H])c([H])c([H])c1[H]	0 (Inactive)	0	0	0
348	PUBCHEM_CID_629852	[H]OC(=O)c1c([H])c([H])c2nc(-c3c([H])c([H])c([H])c([H])c3[H])c(nc2c1[H])-c1c([H])c([H])c([H])c([H])c1[H]	0 (Inactive)	0	0	0
349	PUBCHEM_CID_16760027	[H]N(C(=O)C([H])([H])c1c([H])c([H])c([H])c([H])c1[H])c1nc([H])c(s1)C([H])(C([H])([H])[H])C([H])([H])[H]	0 (Inactive)	0	0	0
350	PUBCHEM_CID_44634693	[H]O[C@]1([H])C([H])([H])C([H])([H])[C@@]([H])(C([H])([H])[C@@]([H])(C([H])([H])[H])[C@@]2([H])OC(=O)[C@@]3([H])N(C(=O)C(=O)[C@]4(O[H])O[C@@]([H])(C([H])([H])C([H])([H])[C@@]4([H])C([H])([H])[H])C([H])([H])[C@]([H])(OC([H])([H])[H])\C(=C(\[H])/C(/[H])=C(\[H])/C(/[H])=C([H])/[C@@]([H])(C([H])([H])[H])C([H])([H])[C@]([H])(C(=O)[C@]([H])(OC([H])([H])[H])[C@]([H])(O[H])C(=C([H])[C@]([H])(C(=O)C2([H])…	0 (Inactive)	0	0	0
351	PUBCHEM_CID_5311053	[H]OC(=O)C([H])([H])C([H])([H])C([H])([H])C(\[H])=C(\[H])C([H])([H])[C@@]1([H])[C@@]([H])(O[H])C([H])([H])[C@@]([H])(O[H])[C@]1([H])C(\[H])=C(/[H])[C@@]([H])(O[H])C([H])([H])Oc1c([H])c([H])c([H])c(Cl)c1[H]	0 (Inactive)	0	0	0
352	PUBCHEM_CID_6610216	[H]O[C@]([H])(c1c([H])c([H])c([H])c([H])c1[H])[C@]([H])(N([H])C(=O)C([H])([H])C([H])([H])C([H])([H])C([H])([H])C([H])([H])C([H])([H])C([H])([H])C([H])([H])C([H])([H])[H])C([H])([H])N1C([H])([H])C([H])([H])OC([H])([H])C1([H])[H]	0 (Inactive)	0	0	0
353	PUBCHEM_CID_445580	[H]OC(=O)C([H])([H])C([H])([H])C(\[H])=C(\[H])C([H])([H])C(\[H])=C(\[H])C([H])([H])C([H])=C([H])C([H])([H])C(\[H])=C(\[H])C([H])([H])C(\[H])=C(\[H])C([H])([H])C(\[H])=C(/[H])C([H])([H])C([H])([H])[H]	0 (Inactive)	0	0	0
354	PUBCHEM_CID_5312557	[H]OC(=O)C([H])([H])C([H])([H])C([H])([H])C([H])([H])C([H])([H])C([H])([H])C([H])([H])C([H])([H])C([H])([H])C([H])([H])C([H])([H])C(\[H])=C(\[H])C([H])([H])C(\[H])=C(\[H])C([H])([H])C(\[H])=C(\[H])C([H])([H])C([H])([H])[H]	0 (Inactive)	0	0	0
355	PUBCHEM_CID_5353623	[H]OC(=O)C([H])([H])SC([H])([H])C(\[H])=C(/C([H])([H])[H])C([H])([H])C([H])([H])C(\[H])=C(/C([H])([H])[H])C([H])([H])C([H])([H])C([H])=C(C([H])([H])[H])C([H])([H])[H]	0 (Inactive)	0	0	0
356	PUBCHEM_CID_5311100	[H]OC(=O)C([H])([H])C([H])([H])C([H])([H])C(\[H])=C(\[H])C([H])([H])[C@@]1([H])[C@@]([H])(O[H])C([H])([H])[C@@]([H])(O[H])[C@]1([H])C(\[H])=C(/[H])[C@@]([H])(O[H])C([H])([H])Oc1c([H])c([H])c([H])c(c1[H])C(F)(F)F	0 (Inactive)	0	0	0
357	PUBCHEM_CID_5280933	[H]OC(=O)C([H])([H])C([H])([H])C([H])([H])C([H])([H])C(\[H])=C(\[H])C([H])([H])C(\[H])=C(/[H])C([H])([H])C(\[H])=C(\[H])C([H])([H])C([H])([H])C([H])([H])C([H])([H])C([H])([H])[H]	0 (Inactive)	0	0	0
358	PUBCHEM_CID_6435901	[H]N([H])C(=O)C([H])([H])C([H])([H])C([H])([H])C([H])([H])C([H])([H])C([H])([H])C([H])([H])C(\[H])=C(\[H])C([H])([H])C(\[H])=C(\[H])C([H])([H])C([H])([H])C([H])([H])C([H])([H])C([H])([H])[H]	0 (Inactive)	0	0	0
359	PUBCHEM_CID_5280450	[H]OC(=O)C([H])([H])C([H])([H])C([H])([H])C([H])([H])C([H])([H])C([H])([H])C([H])([H])C(\[H])=C(\[H])C([H])([H])C(\[H])=C(\[H])C([H])([H])C([H])([H])C([H])([H])C([H])([H])C([H])([H])[H]	0 (Inactive)	0	0	0
360	PUBCHEM_CID_5280934	[H]OC(=O)C([H])([H])C([H])([H])C([H])([H])C([H])([H])C([H])([H])C([H])([H])C([H])([H])C(\[H])=C(\[H])C([H])([H])C(\[H])=C(\[H])C([H])([H])C(\[H])=C(\[H])C([H])([H])C([H])([H])[H]	0 (Inactive)	0	0	0
361	PUBCHEM_CID_3969	[H]Oc1c(c([H])c([H])c(OC([H])([H])C([H])([H])C([H])([H])C([H])([H])c2nnn([H])n2)c1C([H])([H])C([H])([H])C([H])([H])[H])C(=O)C([H])([H])[H]	0 (Inactive)	0	0	0
362	PUBCHEM_CID_124735	[H]O[C@@]([H])(c1c([H])c([H])c([H])c([H])c1[H])[C@]([H])(N([H])C(=O)C([H])([H])C([H])([H])C([H])([H])C([H])([H])C([H])([H])C([H])([H])C([H])([H])C([H])([H])C([H])([H])C([H])([H])C([H])([H])C([H])([H])C([H])([H])[H])C([H])([H])[H]	0 (Inactive)	0	0	0
363	PUBCHEM_CID_6610217	[H]O[C@]([H])(c1c([H])c([H])c([H])c([H])c1[H])[C@@]([H])(N([H])C(=O)C([H])([H])C([H])([H])C([H])([H])C([H])([H])C([H])([H])C([H])([H])C([H])([H])C([H])([H])C([H])([H])C([H])([H])C([H])([H])C([H])([H])C([H])([H])[H])C([H])([H])[H]	0 (Inactive)	0	0	0
364	PUBCHEM_CID_5312531	[H]OC(=O)C([H])([H])C([H])([H])C([H])([H])C(\[H])=C(\[H])C([H])([H])C(\[H])=C(\[H])C([H])([H])C(\[H])=C(\[H])C([H])([H])C([H])([H])C([H])([H])C([H])([H])C([H])([H])C([H])([H])C([H])([H])C([H])([H])[H]	0 (Inactive)	0	0	0
365	PUBCHEM_CID_5353760	[H]OC(=O)C(\[H])=C(\C(\[H])=C(/[H])C([H])([H])[C@]([H])(C([H])([H])[H])C([H])([H])C([H])([H])C([H])([H])C(OC([H])([H])[H])(C([H])([H])[H])C([H])([H])[H])/C([H])([H])[H]	0 (Inactive)	0	0	0
366	PUBCHEM_CID_6433346	[H]OC(=O)C([H])([H])N([H])C(=O)C([H])([H])C([H])([H])C([H])([H])C([H])([H])C([H])([H])C([H])([H])C([H])([H])C(\[H])=C(\[H])C([H])([H])C(\[H])=C(\[H])C([H])([H])C([H])([H])C([H])([H])C([H])([H])C([H])([H])[H]	0 (Inactive)	0	0	0
367	PUBCHEM_CID_5281912	[H]OC(=O)C([H])([H])C([H])([H])C([H])([H])C([H])([H])C([H])([H])C([H])([H])[C@@]1([H])C(=O)C([H])=C([H])[C@]1([H])C(\[H])=C(/[H])[C@@]([H])(O[H])C([H])([H])C([H])([H])C([H])([H])C([H])([H])C([H])([H])[H]	0 (Inactive)	0	0	0
368	PUBCHEM_CID_5280880	[H]OC(=O)C([H])([H])C([H])([H])C([H])([H])C(\[H])=C(\[H])C([H])([H])[C@@]1([H])C(=O)C([H])=C([H])[C@]1([H])C([H])=C([H])[C@@]([H])(O[H])C([H])([H])C([H])([H])C([H])([H])C([H])([H])C([H])([H])[H]	0 (Inactive)	0	0	0
369	PUBCHEM_CID_5280881	[H]OC(=O)C([H])([H])C([H])([H])C([H])([H])C(\[H])=C(\[H])C([H])([H])C1=C(\C([H])=C(/[H])[C@@]([H])(O[H])C([H])([H])C([H])([H])C([H])([H])C([H])([H])C([H])([H])[H])C([H])([H])C([H])([H])C1=O	0 (Inactive)	0	0	0
370	PUBCHEM_CID_5059	[H]O[C@@]([H])(c1c([H])c([H])c([H])c(OC([H])([H])c2nc3c([H])c([H])c([H])c([H])c3c([H])c2[H])c1[H])C([H])([H])C([H])([H])C([H])([H])C([H])([H])C([H])([H])[H]	0 (Inactive)	0	0	0
371	PUBCHEM_CID_6439225	[H]N([H])[C@]([H])(C(=O)OC([H])([H])[H])C([H])([H])SC([H])([H])C(\[H])=C(/C([H])([H])[H])C([H])([H])C([H])([H])C(\[H])=C(/C([H])([H])[H])C([H])([H])C([H])([H])C([H])=C(C([H])([H])[H])C([H])([H])[H]	0 (Inactive)	0	0	0
372	PUBCHEM_CID_6610319	[H]OC(=O)C1=C([H])[C@@]2([H])c3c(O[H])c([H])c(c([H])c3OC(C([H])([H])[H])(C([H])([H])[H])[C@]2([H])C([H])([H])C1([H])[H])C([H])([H])C([H])([H])C([H])([H])C([H])([H])C([H])([H])[H]	0 (Inactive)	0	0	0
373	PUBCHEM_CID_5289501	[H]OC(=O)c1c([H])c([H])c(\C([H])=C(\c2c([H])c([H])c3c(c2[H])C(C([H])([H])[H])(C([H])([H])[H])C([H])([H])C([H])([H])C3(C([H])([H])[H])C([H])([H])[H])C([H])([H])[H])c([H])c1[H]	0 (Inactive)	0	0	0
374	PUBCHEM_CID_5311501	[H]c1c([H])c([H])c2c(c([H])c([H])c([H])c2c1[H])C(=O)c1c(n2c3c(OC([H])([H])[C@@]2([H])C([H])([H])N2C([H])([H])C([H])([H])OC([H])([H])C2([H])[H])c([H])c([H])c([H])c13)C([H])([H])[H]	0 (Inactive)	0	0	0
375	PUBCHEM_CID_5694	[H]OC(=O)C([H])([H])Sc1nc(Cl)c([H])c(n1)N([H])c1c([H])c([H])c([H])c(c1C([H])([H])[H])C([H])([H])[H]	0 (Inactive)	0	0	0
376	PUBCHEM_CID_2303	[H]N1C(=C(C(=O)OC([H])([H])[H])[C@]([H])(C(=C1C([H])([H])[H])[N+]([O-])=O)c1c([H])c([H])c([H])c([H])c1C(F)(F)F)C([H])([H])[H]	0 (Inactive)	0	0	0
377	PUBCHEM_CID_108107	[H]N([H])C(=N/C([H])([H])c1c([H])c([H])c([H])c([H])c1[H])\N([H])C(=O)c1nc(Cl)c(nc1N([H])[H])N([H])[H]	0 (Inactive)	0	0	0
378	PUBCHEM_CID_44483253	[H]c1n([H])c2c([H])c([H])c([H])c3c2c1[C@]1([H])[C@]2([H])N(C(=O)[C@@]([H])(C(=O)C([H])([H])[H])C2=O)C(C([H])([H])[H])(C([H])([H])[H])[C@]1([H])C3([H])[H]	0 (Inactive)	0	0	0
379	PUBCHEM_CID_6914273	[H]N1C(=O)N(\N=C(/[H])c2oc(c([H])c2[H])-c2c([H])c([H])c(c([H])c2[H])[N+]([O-])=O)C([H])([H])C1=O	0 (Inactive)	0	0	0
380	PUBCHEM_CID_3019	[H]N1C(=NS(=O)(=O)c2c([H])c(Cl)c([H])c([H])c12)C([H])([H])[H]	0 (Inactive)	0	0	0
381	PUBCHEM_CID_3185	[H]N(c1c([H])c([H])c(c([H])c1[H])C(=O)C1([H])C([H])([H])C([H])([H])N(C([H])([H])C([H])([H])c2nc(c([H])c([H])c2[H])C([H])([H])[H])C([H])([H])C1([H])[H])S(=O)(=O)C([H])([H])[H]	0 (Inactive)	0	0	0
382	PUBCHEM_CID_3356	[H]N(C(=O)c1c([H])c(OC([H])([H])C(F)(F)F)c([H])c([H])c1OC([H])([H])C(F)(F)F)C([H])([H])[C@@]1([H])N([H])C([H])([H])C([H])([H])C([H])([H])C1([H])[H]	0 (Inactive)	0	0	0
383	PUBCHEM_CID_3371	[H]OC(=O)c1c([H])c([H])c([H])c([H])c1N([H])c1c([H])c([H])c([H])c(c1[H])C(F)(F)F	0 (Inactive)	0	0	0
384	PUBCHEM_CID_941361	[H]\C(=C(\[H])C([H])([H])N1C([H])([H])C([H])([H])N(C([H])([H])C1([H])[H])C([H])(c1c([H])c([H])c(F)c([H])c1[H])c1c([H])c([H])c(F)c([H])c1[H])c1c([H])c([H])c([H])c([H])c1[H]	0 (Inactive)	0	0	0
385	PUBCHEM_CID_3478	[H]N(C(=O)c1nc([H])c(nc1[H])C([H])([H])[H])C([H])([H])C([H])([H])c1c([H])c([H])c(c([H])c1[H])S(=O)(=O)N([H])C(=O)N([H])C1([H])C([H])([H])C([H])([H])C([H])([H])C([H])([H])C1([H])[H]	0 (Inactive)	0	0	0
386	PUBCHEM_CID_3488	[H]N(C(=O)c1c([H])c(Cl)c([H])c([H])c1OC([H])([H])[H])C([H])([H])C([H])([H])c1c([H])c([H])c(c([H])c1[H])S(=O)(=O)N([H])C(=O)N([H])C1([H])C([H])([H])C([H])([H])C([H])([H])C([H])([H])C1([H])[H]	0 (Inactive)	0	0	0
387	PUBCHEM_CID_656717	[H]OC(=O)C([H])([H])Oc1c([H])c2c(C(=O)[C@@](C([H])([H])[H])(C2([H])[H])C2([H])C([H])([H])C([H])([H])C([H])([H])C2([H])[H])c(Cl)c1Cl	0 (Inactive)	0	0	0
388	PUBCHEM_CID_3676	[H]N(C(=O)C([H])([H])N(C([H])([H])C([H])([H])[H])C([H])([H])C([H])([H])[H])c1c(c([H])c([H])c([H])c1C([H])([H])[H])C([H])([H])[H]	0 (Inactive)	0	0	0
389	PUBCHEM_CID_3955	[H]OC1(c2c([H])c([H])c(Cl)c([H])c2[H])C([H])([H])C([H])([H])N(C([H])([H])C([H])([H])C(C(=O)N(C([H])([H])[H])C([H])([H])[H])(c2c([H])c([H])c([H])c([H])c2[H])c2c([H])c([H])c([H])c([H])c2[H])C([H])([H])C1([H])[H]	0 (Inactive)	0	0	0
390	PUBCHEM_CID_4474	[H]N1C(=C(C(=O)OC([H])([H])[H])[C@]([H])(C(C(=O)OC([H])([H])C([H])([H])N(C([H])([H])[H])C([H])([H])c2c([H])c([H])c([H])c([H])c2[H])=C1C([H])([H])[H])c1c([H])c([H])c([H])c(c1[H])[N+]([O-])=O)C([H])([H])[H]	0 (Inactive)	0	0	0
391	PUBCHEM_CID_4488	[H]OC(=O)c1c([H])c([H])c([H])nc1N([H])c1c([H])c([H])c([H])c(c1[H])C(F)(F)F	0 (Inactive)	0	0	0
392	PUBCHEM_CID_5420804	[H]C([H])=C1C(=O)O[C@]2([H])[C@@]3([H])O[C@]3(C([H])([H])[H])C([H])([H])C([H])([H])\C([H])=C(C([H])([H])[H])/C([H])([H])C([H])([H])[C@@]12[H]	0 (Inactive)	0	0	0
393	PUBCHEM_CID_39042	[H]OC(=O)C(Oc1c([H])c([H])c(c([H])c1[H])C([H])([H])C([H])([H])N([H])C(=O)c1c([H])c([H])c(Cl)c([H])c1[H])(C([H])([H])[H])C([H])([H])[H]	0 (Inactive)	0	0	0
394	PUBCHEM_CID_6610302	[H]O[C@]([H])(C([H])([H])C1([H])C([H])([H])C(=O)N(C(=O)C1([H])[H])C([H])([H])C(=O)OC([H])([H])C([H])([H])[H])[C@@]1([H])C(=O)[C@@]([H])(C([H])([H])[H])C([H])([H])[C@]([H])(C([H])([H])[H])C1([H])[H]	0 (Inactive)	0	0	0
395	PUBCHEM_CID_5282071	[H]O[C@]1([H])C([H])([H])C([H])([H])[C@@]([H])(C(\[H])=C(/C([H])([H])[H])[C@@]2([H])OC(=O)[C@@]3([H])N(C(=O)C(=O)[C@]4(O[H])O[C@@]([H])([C@@]([H])(OC([H])([H])[H])C([H])([H])[C@@]4([H])C([H])([H])[H])[C@@]([H])(OC([H])([H])[H])C([H])([H])[C@@]([H])(C([H])([H])[H])C([H])([H])\C(=C([H])/[C@]([H])(C(=O)C([H])([H])[C@]([H])(O[H])[C@@]2([H])C([H])([H])[H])C([H])([H])C([H])([H])[H])C([H])([H])[H])C([H]…	0 (Inactive)	0	0	0
396	PUBCHEM_CID_3194	[H]c1c([H])c([H])c(c([H])c1[H])-n1[se]c2c([H])c([H])c([H])c([H])c2c1=O	0 (Inactive)	0	0	0
398	PUBCHEM_CID_72124	[H]N(C#N)C(=N\C([H])([H])[H])\N([H])c1c([H])c([H])c(c([H])c1[H])C1=NN([H])C(=O)C([H])([H])[C@]1([H])C([H])([H])[H]	0 (Inactive)	0	0	0
399	PUBCHEM_CID_5092	[H]N1C(=O)C([H])([H])[C@@]([H])(c2c([H])c([H])c(OC([H])([H])[H])c(OC3([H])C([H])([H])C([H])([H])C([H])([H])C3([H])[H])c2[H])C1([H])[H]	0 (Inactive)	0	0	0
400	PUBCHEM_CID_5087	[H]N1C(=O)N([H])[C@]([H])(C([H])([H])c2c([H])c([H])c(OC([H])([H])[H])c(OC([H])([H])C([H])([H])C([H])([H])C([H])([H])[H])c2[H])C1([H])[H]	0 (Inactive)	0	0	0
401	PUBCHEM_CID_1348	[H]N(c1nnc(-c2c([H])c([H])c([H])c([H])c2[H])c2c([H])c([H])c([H])c([H])c12)c1c([H])c([H])c([H])c(Cl)c1[H]	0 (Inactive)	0	0	0
402	PUBCHEM_CID_1960	[H]N([H])C([H])([H])C([H])([H])N([H])S(=O)(=O)c1c([H])c([H])c([H])c2c(Cl)c([H])c([H])c([H])c12	0 (Inactive)	0	0	0
403	PUBCHEM_CID_6438381	[H]OC(=O)[C@@]([H])(N([H])C(=O)C([H])([H])[H])C([H])([H])SC([H])([H])C(\[H])=C(/C([H])([H])[H])C([H])([H])C([H])([H])C(\[H])=C(/C([H])([H])[H])C([H])([H])C([H])([H])C([H])=C(C([H])([H])[H])C([H])([H])[H]	0 (Inactive)	0	0	0
404	PUBCHEM_CID_5328779	[H]Oc1c([H])c([H])c(\C([H])=C(/C#N)C(=O)N([H])C([H])([H])c2c([H])c([H])c([H])c([H])c2[H])c([H])c1O[H]	0 (Inactive)	0	0	0
405	PUBCHEM_CID_2049	[H]c1nc2c([H])c(OC([H])([H])[H])c(OC([H])([H])[H])c([H])c2nc1-c1c([H])c([H])c([H])c([H])c1[H]	0 (Inactive)	0	0	0
406	PUBCHEM_CID_155806	[H]n1c(nc2n(c(=O)n(c(=O)c12)C([H])([H])[H])C([H])([H])C([H])(C([H])([H])[H])C([H])([H])[H])C([H])([H])OC([H])([H])[H]	0 (Inactive)	0	0	0
407	PUBCHEM_CID_6610310	[H]N(c1nc([H])nc2c([H])c([H])c(Cl)c([H])c12)C([H])([H])c1c([H])c([H])c2OC([H])([H])Oc2c1[H]	0 (Inactive)	0	0	0
408	PUBCHEM_CID_44634695	[H]O[C@]([H])([C@]([H])(C([H])([H])[H])[C@@]1([H])OC(=O)\C(OC([H])([H])[H])=C([H])/C(=C([H])[C@@]([H])(C([H])([H])[H])[C@@]([H])(O[H])[C@@]([H])(C([H])([H])[H])C([H])([H])\C(=C(/[H])\C(\[H])=C([H])/[C@]1([H])OC([H])([H])[H])C([H])([H])[H])C([H])([H])[H])[C@]([H])(C([H])([H])[H])[C@]1(O[H])O[C@]([H])(C([H])(C([H])([H])[H])C([H])([H])[H])[C@@]([H])(C([H])([H])[H])[C@]([H])(O[H])C1([H])[H]	0 (Inactive)	0	0	1
409	PUBCHEM_CID_3476986	[H]O[C@]12C(=Nc3c([H])c([H])c(c([H])c3C1=O)C([H])([H])[H])N(c1c([H])c([H])c([H])c([H])c1[H])C([H])([H])C2([H])[H]	0 (Inactive)	0	0	0
410	PUBCHEM_CID_16760034	[H]OC(=O)C(\[H])=C(/C(/[H])=C(/[H])[C@@]([H])(C([H])([H])[H])C([H])([H])C(\[H])=C(\[H])C([H])([H])C([H])([H])C(\[H])=C(/[H])\C(\[H])=C(/[H])C([H])([H])[C@]([H])(OC([H])([H])[H])C(=C(\[H])C([H])=C(C(=O)O[H])C([H])([H])[H])\C([H])([H])[H])\C([H])([H])C(=O)O[H]	0 (Inactive)	0	0	0
411	PUBCHEM_CID_1649	[H]c1c([H])c([N+]([O-])=O)c2nn([H])c(Br)c2c1[H]	0 (Inactive)	0	0	0
412	PUBCHEM_CID_2471	[H]OC(=O)c1c([H])c(N([H])C([H])([H])C([H])([H])C([H])([H])C([H])([H])[H])c(Oc2c([H])c([H])c([H])c([H])c2[H])c(c1[H])S(=O)(=O)N([H])[H]	0 (Inactive)	0	0	0
414	PUBCHEM_CID_23760717	[H]N(C(=O)[C@@]1([H])O[C@]1([H])C(=O)N([H])[C@]([H])(C(=O)N1C([H])([H])C([H])([H])C([H])([H])[C@@]1([H])C(=O)OC([H])([H])[H])[C@]([H])(C([H])([H])[H])C([H])([H])C([H])([H])[H])C([H])([H])C([H])([H])C([H])([H])[H]	0 (Inactive)	0	0	0
415	PUBCHEM_CID_10930781	[H]Oc1c([H])c([H])c(OC(=O)O[C@]([H])(C([H])([H])[H])C([H])([H])c2c(OC([H])([H])[H])c(O[H])c3c4c(c(OC([H])([H])[H])c([H])c3=O)c3c(OC([H])([H])[H])c([H])c(=O)c5c(O[H])c(OC([H])([H])[H])c(c(c24)c35)C([H])([H])[C@]([H])(OC(=O)c2c([H])c([H])c([H])c([H])c2[H])C([H])([H])[H])c([H])c1[H]	0 (Inactive)	0	0	0
416	PUBCHEM_CID_16760037	[H]O[C@@]([H])(C(=O)N([H])C([H])([H])C([H])([H])[C@]([H])(c1nc(\C([H])=C(/[H])C([H])([H])[C@@]2([H])O[C@@]3(O[C@]([H])([C@]([H])(OC([H])([H])[H])C([H])([H])[C@@]([H])(O[H])[C@@]([H])(C([H])([H])[H])[C@@]([H])(O[H])[C@]([H])(C(\[H])=C(\C(=C(/[H])\C(\[H])=C(/[H])\C(=C(\[H])C#N)\C([H])([H])[H])\C([H])([H])[H])/C([H])([H])[H])C([H])([H])[H])[C@@]([H])(OP(=O)(O[H])O[H])C3(C([H])([H])[H])C([H])([H])[H]…	0 (Inactive)	0	0	0
417	PUBCHEM_CID_6610322	[H]O[C@@]1(C(=O)OC([H])([H])c2c1c([H])c1n(-c3c([H])c4c([H])c([H])c([H])c([H])c4nc3C1([H])[H])c2=O)C([H])([H])C([H])([H])[H]	0 (Inactive)	0	0	0
418	PUBCHEM_CID_2688	[H]N1c2c([H])c([H])c(Cl)c([H])c2[C@]([H])(SC([H])([H])C1=O)c1c([H])c([H])c([H])c([H])c1Cl	0 (Inactive)	0	0	0
419	PUBCHEM_CID_2703	[H]c1c([H])c2c(c([H])[n+](c3c4c([H])c5OC([H])([H])Oc5c([H])c4c([H])c([H])c23)C([H])([H])[H])c(OC([H])([H])[H])c1OC([H])([H])[H]	0 (Inactive)	0	0	0
420	PUBCHEM_CID_5281787	[H]Oc1c([H])c([H])c(\C([H])=C(/[H])C(=O)OC([H])([H])C([H])([H])c2c([H])c([H])c([H])c([H])c2[H])c([H])c1O[H]	0 (Inactive)	0	0	0
421	PUBCHEM_CID_2803	[H]N(C1=NC([H])([H])C([H])([H])N1[H])c1c(Cl)c([H])c([H])c([H])c1Cl	0 (Inactive)	0	0	0
422	PUBCHEM_CID_5280754	[H]O[C@@]([H])([C@]([H])(C([H])([H])[H])C([H])([H])C(\[H])=C(/[H])C([H])([H])[H])[C@@]1([H])N(C(=O)[C@@]([H])(N(C(=O)[C@]([H])(N(C(=O)[C@]([H])(N(C(=O)[C@]([H])(N([H])C(=O)[C@]([H])(N([H])C(=O)[C@]([H])(N(C(=O)[C@@]([H])(N([H])C(=O)[C@]([H])(N(C(=O)C([H])([H])N(C(=O)[C@]([H])(N([H])C1=O)C([H])([H])C([H])([H])[H])C([H])([H])[H])C([H])([H])[H])C([H])([H])C([H])(C([H])([H])[H])C([H])([H])[H])C([H])(…	0 (Inactive)	0	0	0
423	PUBCHEM_CID_44634701	[H]O[C@]1([H])C(=C([H])[H])[C@@]([H])(C([H])([H])[H])[C@@]2([H])[C@@]([H])(N([H])C(=O)[C@]22OC(=O)\C([H])=C([H])/[C@]([H])(O[H])C([H])([H])C([H])([H])C([H])([H])[C@@]([H])(C([H])([H])[H])C([H])([H])C([H])=C([H])[C@@]12[H])C([H])([H])c1c([H])c([H])c([H])c([H])c1[H]	0 (Inactive)	0	0	0
424	PUBCHEM_CID_5743	[H]OC([H])([H])C(=O)[C@@]1(O[H])[C@]([H])(C([H])([H])[H])C([H])([H])[C@@]2([H])[C@]3([H])C([H])([H])C([H])([H])C4=C([H])C(=O)C([H])=C([H])[C@]4(C([H])([H])[H])[C@@]3(F)[C@@]([H])(O[H])C([H])([H])[C@]12C([H])([H])[H]	0 (Inactive)	0	0	0
425	PUBCHEM_CID_9687	[H]OP1(=O)OC([H])([H])[C@@]2([H])O[C@@]([H])(n3c([H])nc4c(nc([H])nc34)N([H])C(=O)C([H])([H])C([H])([H])C([H])([H])[H])[C@]([H])(OC(=O)C([H])([H])C([H])([H])C([H])([H])[H])[C@]2([H])O1	0 (Inactive)	0	0	0
426	PUBCHEM_CID_135403793	[H]OP1(=O)OC([H])([H])[C@]2([H])O[C@]([H])(n3c([H])nc4c3nc(N([H])C(=O)C([H])([H])C([H])([H])C([H])([H])[H])n([H])c4=O)[C@@]([H])(OC(=O)C([H])([H])C([H])([H])C([H])([H])[H])[C@@]2([H])O1	0 (Inactive)	0	0	0
427	PUBCHEM_CID_644213	[H]N(C(=O)c1c([H])c(c([H])c([H])c1Cl)[N+]([O-])=O)c1c([H])c([H])c([H])c([H])c1[H]	0 (Inactive)	0	0	0
428	PUBCHEM_CID_3101	[H]c1c([H])c([H])c-2c([I+]c3c([H])c([H])c([H])c([H])c-23)c1[H]	0 (Inactive)	0	0	0
429	PUBCHEM_CID_6610267	[H]OC([H])([H])[C@@]1([H])O[C@@]([H])(n2c([H])nc3c([H])c(Cl)c(Cl)c([H])c23)[C@]([H])(O[H])[C@@]1([H])O[H]	0 (Inactive)	0	0	0
431	PUBCHEM_CID_439525	[H]Oc1c(OC([H])([H])[H])c([H])c(c([H])c1OC([H])([H])[H])[C@]1([H])c2c([H])c3OC([H])([H])Oc3c([H])c2[C@@]([H])(O[C@]2([H])O[C@]3([H])C([H])([H])O[C@@]([H])(O[C@]3([H])[C@]([H])(O[H])[C@@]2([H])O[H])C([H])([H])[H])[C@@]2([H])C([H])([H])OC(=O)[C@]12[H]	0 (Inactive)	0	0	0
432	PUBCHEM_CID_3330	[H]N(N=C(C#N)C#N)c1c([H])c([H])c(OC(F)(F)F)c([H])c1[H]	0 (Inactive)	0	0	0
433	PUBCHEM_CID_5083	[H]N=C(SC([H])([H])C([H])([H])C([H])([H])n1c([H])c(C2=C(C(=O)N([H])C2=O)c2c([H])n(c3c([H])c([H])c([H])c([H])c23)C([H])([H])[H])c2c([H])c([H])c([H])c([H])c12)N([H])[H]	0 (Inactive)	0	0	0
434	PUBCHEM_CID_3501	[H]N1C(=O)c2c(c3c4c([H])c([H])c([H])c([H])c4n(c3c3n(c4c([H])c([H])c([H])c([H])c4c23)C([H])([H])[H])C([H])([H])C([H])([H])C#N)C1([H])[H]	0 (Inactive)	0	0	0
435	PUBCHEM_CID_3542	[H]N1C([H])([H])C([H])([H])N([C@@]([H])(C([H])([H])[H])C1([H])[H])S(=O)(=O)c1c([H])c([H])c([H])c2c([H])nc([H])c([H])c12	0 (Inactive)	0	0	0
436	PUBCHEM_CID_449241	[H]N(C([H])([H])C(\[H])=C(/[H])c1c([H])c([H])c(Br)c([H])c1[H])C([H])([H])C([H])([H])N([H])S(=O)(=O)c1c([H])c([H])c([H])c2c([H])nc([H])c([H])c12	0 (Inactive)	0	0	0
437	PUBCHEM_CID_3546	[H]N([H])C(=NC([H])([H])C([H])([H])N([H])S(=O)(=O)c1c([H])c([H])c([H])c2c([H])nc([H])c([H])c12)N([H])[H]	0 (Inactive)	0	0	0
438	PUBCHEM_CID_5912039	[H]N([H])[C@]12\C(=C(/[H])C([H])([H])[H])[C@]([H])(C([H])=C(C([H])([H])[H])C1([H])[H])C([H])([H])c1n([H])c(=O)c([H])c([H])c21	0 (Inactive)	0	0	0
439	PUBCHEM_CID_3758	[H]c1nc2n(c(=O)n(c(=O)c2n1[H])C([H])([H])[H])C([H])([H])C([H])(C([H])([H])[H])C([H])([H])[H]	0 (Inactive)	0	0	0
440	PUBCHEM_CID_6610352	[H]O[C@]1(C(=O)OC([H])([H])[H])C([H])([H])[C@]2([H])O[C@]1(n1c3c([H])c([H])c([H])c([H])c3c3c4c(C(=O)N([H])C4([H])[H])c4c5c([H])c([H])c([H])c([H])c5n2c4c13)C([H])([H])[H]	0 (Inactive)	0	0	0
441	PUBCHEM_CID_6610354	[H]SC([H])([H])[C@]([H])(N([H])[H])C([H])([H])N([H])[C@]([H])(C([H])([H])O[C@]([H])(C(=O)N([H])[C@]([H])(C(=O)OC([H])(C([H])([H])[H])C([H])([H])[H])C([H])([H])C([H])([H])S(=O)(=O)C([H])([H])[H])C([H])([H])c1c([H])c([H])c([H])c([H])c1[H])[C@]([H])(C([H])([H])[H])C([H])([H])C([H])([H])[H]	0 (Inactive)	0	0	0
442	PUBCHEM_CID_6610355	[H]OC([H])([H])C([H])([H])N([H])c1nc(N([H])C([H])([H])c2c([H])c([H])c([H])c([H])c2[H])c2nc([H])n(c2n1)C([H])(C([H])([H])[H])C([H])([H])[H]	0 (Inactive)	0	0	0
443	PUBCHEM_CID_5353431	[H]\C(C#N)=C(\[H])S(=O)(=O)c1c([H])c([H])c(c([H])c1[H])C([H])([H])[H]	0 (Inactive)	0	0	0
444	PUBCHEM_CID_3973	[H]c1c([H])c([H])c(c([H])c1[H])-c1c([H])c([H])c([H])c2c1oc(c([H])c2=O)N1C([H])([H])C([H])([H])OC([H])([H])C1([H])[H]	0 (Inactive)	0	0	0
445	PUBCHEM_CID_3976	[H]N(C1=C([H])C(=O)c2nc([H])c([H])c([H])c2C1=O)c1c([H])c([H])c([H])c([H])c1[H]	0 (Inactive)	0	0	0
446	PUBCHEM_CID_44483259	[H]O[C@@]1(\C([H])=C(/[H])\C(\[H])=C(/[H])\C(\[H])=C(/[H])C(=O)N([H])C2([H])C(=O)C([H])([H])C([H])([H])C2=O)C([H])=C(N([H])C(=O)C(=C(/[H])\C(=C(/[H])[C@]([H])(C([H])([H])[H])C([H])([H])C([H])([H])C([H])([H])C([H])([H])[H])\C([H])([H])[H])\C([H])([H])[H])C(=O)[C@@]2([H])O[C@@]12[H]	0 (Inactive)	0	0	1
447	PUBCHEM_CID_5746	[H]N([H])C(=O)OC([H])([H])[C@]1([H])C2=C(N3C([H])([H])[C@]4([H])N([H])[C@]4([H])[C@]13OC([H])([H])[H])C(=O)C(=C(N([H])[H])C2=O)C([H])([H])[H]	0 (Inactive)	0	0	0
448	PUBCHEM_CID_4216	[H]N1C([H])([H])C([H])([H])N(C([H])([H])C([H])([H])C1([H])[H])S(=O)(=O)c1c([H])c([H])c([H])c2c(I)c([H])c([H])c([H])c12	0 (Inactive)	0	0	0
449	PUBCHEM_CID_4217	[H]N1C([H])([H])C([H])([H])N(C([H])([H])C([H])([H])C1([H])[H])S(=O)(=O)c1c([H])c([H])c([H])c2c(Cl)c([H])c([H])c([H])c12	0 (Inactive)	0	0	0
450	PUBCHEM_CID_1779	[H]OC(=O)c1c([H])c(=O)c2c(Cl)c([H])c(Cl)c([H])c2n1[H]	0 (Inactive)	0	0	0
451	PUBCHEM_CID_3899541	[H]c1c(c(c([H])c2n([H])c(=O)c(=O)n([H])c12)[N+]([O-])=O)[N+]([O-])=O	0 (Inactive)	0	0	0
452	PUBCHEM_CID_54687453	[H]Oc1c(C(=O)C2([H])C([H])([H])C2([H])[H])c(=O)n([H])c2c([H])c(Cl)c([H])c([H])c12	0 (Inactive)	0	0	0
453	PUBCHEM_CID_3721046	[H]c1c(C#N)c(c([H])c2n([H])c(=O)c(=O)n([H])c12)[N+]([O-])=O	0 (Inactive)	0	0	0
454	PUBCHEM_CID_3331	[H]N([H])C(=O)OC([H])([H])C([H])(c1c([H])c([H])c([H])c([H])c1[H])C([H])([H])OC(=O)N([H])[H]	0 (Inactive)	0	0	0
455	PUBCHEM_CID_54682505	[H]Oc1c(-c2c([H])c([H])c([H])c(Oc3c([H])c([H])c([H])c([H])c3[H])c2[H])c(=O)n([H])c2c([H])c(Cl)c([H])c([H])c12	0 (Inactive)	0	0	0
456	PUBCHEM_CID_446916	[H]OC(=O)c1n([H])c2c([H])c(Cl)c([H])c(Cl)c2c1C([H])([H])C([H])([H])C(=O)O[H]	0 (Inactive)	0	0	0
457	PUBCHEM_CID_180081	[H]N1[C@@]2([H])c3c([H])c([H])c([H])c([H])c3[C@@]1(c1c([H])c([H])c([H])c([H])c1C2([H])[H])C([H])([H])[H]	0 (Inactive)	0	0	0
458	PUBCHEM_CID_3272524	[H]N([H])S(=O)(=O)c1c([H])c([H])c([H])c2c1c(c([H])c1n([H])c(=O)c(=O)n([H])c21)[N+]([O-])=O	0 (Inactive)	0	0	0
459	PUBCHEM_CID_2196	[H]c1c([H])c(c([H])c([H])c1OC([H])([H])[H])C(=O)N1C(=O)C([H])([H])C([H])([H])C1([H])[H]	0 (Inactive)	0	0	0
460	PUBCHEM_CID_1370	[H]c1c([H])c(c([H])c2OC([H])([H])Oc12)C(=O)N1C([H])([H])C([H])([H])C([H])([H])C([H])([H])C1([H])[H]	0 (Inactive)	0	0	0
461	PUBCHEM_CID_2910	[H]N([H])S(=O)(=O)c1c([H])c2c(N([H])[C@]([H])(N([H])S2(=O)=O)[C@@]2([H])C([H])([H])[C@@]3([H])C([H])=C([H])[C@]2([H])C3([H])[H])c([H])c1Cl	0 (Inactive)	0	0	0
462	PUBCHEM_CID_3688	[H]N1c2c([H])c([H])c(Cl)c([H])c2S(=O)(=O)N([H])[C@]1([H])C([H])([H])[H]	0 (Inactive)	0	0	0
463	PUBCHEM_CID_65854	[H]N1C([H])([H])C([H])([H])C([H])(Sc2nc(Cl)c([H])c([H])c2[H])C([H])([H])C1([H])[H]	0 (Inactive)	0	0	0
464	PUBCHEM_CID_49381	[H]c1c([H])c([H])c2c(c1[H])C(=Nc1c([H])c(F)c([H])c([H])c1C2([H])[H])N1C([H])([H])C([H])([H])N(C([H])([H])[H])C([H])([H])C1([H])[H]	0 (Inactive)	0	0	0
465	PUBCHEM_CID_4106	[H]c1c([H])c([H])c2c(Sc3c([H])c([H])c(SC([H])([H])[H])c([H])c3[C@]([H])(N3C([H])([H])C([H])([H])N(C([H])([H])[H])C([H])([H])C3([H])[H])C2([H])[H])c1[H]	0 (Inactive)	0	0	0
466	PUBCHEM_CID_1220	[H]Oc1c([H])c([H])c([H])c2c1C([H])([H])[C@]([H])(N(C([H])([H])C([H])([H])C([H])([H])[H])C([H])([H])C([H])([H])C([H])([H])[H])C([H])([H])C2([H])[H]	0 (Inactive)	0	0	0
467	PUBCHEM_CID_3822	[H]c1c([H])c([H])c2c(c1[H])n([H])c(=O)n(c2=O)C([H])([H])C([H])([H])N1C([H])([H])C([H])([H])C([H])(C(=O)c2c([H])c([H])c(F)c([H])c2[H])C([H])([H])C1([H])[H]	0 (Inactive)	0	0	0
468	PUBCHEM_CID_1683	[H]c1c(Cl)c([H])c(c([H])c1Cl)C(=O)O[C@@]1([H])C([H])([H])[C@@]2([H])N(C([H])([H])[H])[C@]([H])(C([H])([H])C2([H])[H])C1([H])[H]	0 (Inactive)	0	0	0
469	PUBCHEM_CID_5012	[H]N1C([H])([H])C([H])([H])N(c2nc3c([H])c([H])c(c([H])c3c([H])c2[H])[N+]([O-])=O)C([H])([H])C1([H])[H]	0 (Inactive)	0	0	0
470	PUBCHEM_CID_27400	[H]c1sc2c(c1[H])C(=C1C([H])([H])C([H])([H])N(C([H])([H])[H])C([H])([H])C1([H])[H])c1c([H])c([H])c([H])c([H])c1C([H])([H])C2([H])[H]	0 (Inactive)	0	0	0
471	PUBCHEM_CID_2264	[H]N(C(=O)c1c([H])c(Cl)c([H])c2N(C(=O)C([H])([H])Oc12)C([H])([H])[H])[C@]1([H])C([H])([H])[N@]2C([H])([H])C([H])([H])[C@]1([H])C([H])([H])C2([H])[H]	0 (Inactive)	0	0	0
472	PUBCHEM_CID_2477	[H]c1nc(nc([H])c1[H])N1C([H])([H])C([H])([H])N(C([H])([H])C([H])([H])C([H])([H])C([H])([H])N2C(=O)C([H])([H])C3(C([H])([H])C([H])([H])C([H])([H])C3([H])[H])C([H])([H])C2=O)C([H])([H])C1([H])[H]	0 (Inactive)	0	0	0
473	PUBCHEM_CID_4595	[H]c1nc(n(c1[H])C([H])([H])[C@@]1([H])C(=O)c2c(n(c3c([H])c([H])c([H])c([H])c23)C([H])([H])[H])C([H])([H])C1([H])[H])C([H])([H])[H]	0 (Inactive)	0	0	0
474	PUBCHEM_CID_60769	[H]N(C([H])([H])C([H])([H])N1C(=O)C([H])([H])C2(C([H])([H])C([H])([H])C([H])([H])C2([H])[H])C([H])([H])C1=O)C([H])([H])[C@]1([H])Oc2c([H])c([H])c([H])c([H])c2OC1([H])[H]	0 (Inactive)	0	0	0
475	PUBCHEM_CID_16759997	[H]O[C@]([H])(C([H])([H])Oc1c([H])c([H])c([H])c2n([H])c(C#N)c([H])c12)C([H])([H])N([H])C(C([H])([H])[H])(C([H])([H])[H])C([H])([H])[H]	0 (Inactive)	0	0	0
476	PUBCHEM_CID_182585	[H]N(C([H])([H])C([H])([H])C([H])([H])C([H])([H])N1C(=O)C([H])([H])C2(C([H])([H])C([H])([H])C([H])([H])C2([H])[H])C([H])([H])C1=O)C([H])([H])[C@]1([H])Oc2c([H])c([H])c([H])c([H])c2OC1([H])[H]	0 (Inactive)	0	0	0
477	PUBCHEM_CID_4013695	[H]c1c([H])c([H])c(N2C([H])([H])C([H])([H])N(C([H])([H])C([H])([H])n3c(=O)n([H])c4c5c([H])c([H])c([H])c([H])c5n([H])c4c3=O)C([H])([H])C2([H])[H])c(OC([H])([H])[H])c1[H]	0 (Inactive)	0	0	0
478	PUBCHEM_CID_2913	[H]c1c([H])c([H])c2c(c1[H])C([H])=C([H])c1c([H])c([H])c([H])c([H])c1C2=C1C([H])([H])C([H])([H])N(C([H])([H])[H])C([H])([H])C1([H])[H]	0 (Inactive)	0	0	0
479	PUBCHEM_CID_1354	[H]N([H])C(\N=C(N([H])[H])N([H])[H])=N\c1c([H])c([H])c([H])c(Cl)c1[H]	0 (Inactive)	0	0	0
480	PUBCHEM_CID_6604789	[H]N(C(=O)C(=O)c1c([H])n(c2c([H])c([H])c([H])c([H])c12)C([H])([H])[H])[C@@]1([H])C([H])([H])[N@]2C([H])([H])C([H])([H])[C@]1([H])C([H])([H])C2([H])[H]	0 (Inactive)	0	0	0
481	PUBCHEM_CID_131747	[H]N([H])C1([H])C([H])([H])C([H])([H])N(c2nc(Cl)c([H])c([H])c2[H])C([H])([H])C1([H])[H]	0 (Inactive)	0	0	0
482	PUBCHEM_CID_9921349	[H]c1c(-c2noc(n2)C([H])([H])N(C([H])([H])[H])C([H])([H])[H])c2c([H])c([H])c([H])c([H])c2n1C([H])([H])[H]	0 (Inactive)	0	0	0
483	PUBCHEM_CID_2837530	[H]c1c(c([H])c(c([H])c1C([H])([H])[H])C([H])([H])[H])C(=O)O[C@@]1([H])C([H])([H])[C@@]2([H])N(C([H])([H])[H])[C@]([H])(C([H])([H])C2([H])[H])C1([H])[H]	0 (Inactive)	0	0	0
484	PUBCHEM_CID_73333	[H]N(C(=O)N1C([H])([H])C([H])([H])N(C([H])([H])C([H])([H])C([H])([H])C([H])(c2c([H])c([H])c(F)c([H])c2[H])c2c([H])c([H])c(F)c([H])c2[H])C([H])([H])C1([H])[H])C([H])([H])C([H])([H])[H]	0 (Inactive)	0	0	0
485	PUBCHEM_CID_127902	[H]c1c([H])c([H])c2sc(nc2c1[H])N1C([H])([H])C([H])([H])N(C([H])([H])c2c([H])c([H])c3OC([H])([H])Oc3c2[H])C([H])([H])C1([H])[H]	0 (Inactive)	0	0	0
486	PUBCHEM_CID_5656	[H]OC1(C([H])([H])C([H])([H])C([H])([H])C([H])([H])C1([H])[H])[C@]([H])(c1c([H])c([H])c(OC([H])([H])[H])c([H])c1[H])C([H])([H])N(C([H])([H])[H])C([H])([H])[H]	0 (Inactive)	0	0	0
487	PUBCHEM_CID_182593	[H]N([H])c1c([H])c(OC([H])([H])[H])c(c([H])c1Cl)C(=O)OC([H])([H])C([H])([H])C([H])([H])N1C([H])([H])C([H])([H])C([H])([H])C([H])([H])C1([H])[H]	0 (Inactive)	0	0	0
488	PUBCHEM_CID_5145950	[H]N([H])c1c([H])c(OC([H])([H])c2c([H])c(OC([H])([H])[H])c([H])c(OC([H])([H])[H])c2[H])c(c([H])c1Cl)C(=O)C([H])([H])C([H])([H])C1([H])C([H])([H])C([H])([H])N(C([H])([H])C([H])([H])N([H])S(=O)(=O)C([H])([H])[H])C([H])([H])C1([H])[H]	0 (Inactive)	0	0	0
489	PUBCHEM_CID_3386	[H]N(C([H])([H])[H])C([H])([H])C([H])([H])[C@@]([H])(Oc1c([H])c([H])c(c([H])c1[H])C(F)(F)F)c1c([H])c([H])c([H])c([H])c1[H]	0 (Inactive)	0	0	0
490	PUBCHEM_CID_1833	[H]N([H])C([H])([H])C([H])([H])c1c([H])n([H])c2c([H])c([H])c(OC([H])([H])[H])c([H])c12	0 (Inactive)	0	0	0
491	PUBCHEM_CID_5191	[H]N([H])c1c([H])c(OC([H])([H])[H])c(c([H])c1Cl)C(=O)OC([H])([H])C([H])([H])N(C([H])([H])C([H])([H])[H])C([H])([H])C([H])([H])[H]	0 (Inactive)	0	0	0
492	PUBCHEM_CID_5595	[H]c1n([H])c2c([H])c([H])c([H])c([H])c2c1C(=O)O[C@@]1([H])C([H])([H])[C@@]2([H])N(C([H])([H])[H])[C@]([H])(C([H])([H])C2([H])[H])C1([H])[H]	0 (Inactive)	0	0	0
493	PUBCHEM_CID_4636	[H]Oc1c(c(c(c([H])c1C(C([H])([H])[H])(C([H])([H])[H])C([H])([H])[H])C([H])([H])[H])C([H])([H])C1=NC([H])([H])C([H])([H])N1[H])C([H])([H])[H]	0 (Inactive)	0	0	0
494	PUBCHEM_CID_3970	[H]N(C(=O)c1nn(c2c([H])c([H])c([H])c([H])c12)C([H])([H])[H])[C@@]1([H])C([H])([H])[C@@]2([H])N(C([H])([H])[H])[C@]([H])(C([H])([H])C2([H])[H])C1([H])[H]	0 (Inactive)	0	0	0
495	PUBCHEM_CID_4199	[H]N(c1nnc(c([H])c1C([H])([H])[H])-c1c([H])c([H])c([H])c([H])c1[H])C([H])([H])C([H])([H])N1C([H])([H])C([H])([H])OC([H])([H])C1([H])[H]	0 (Inactive)	0	0	0
496	PUBCHEM_CID_1989	[H]N(C(=O)N([H])S(=O)(=O)c1c([H])c([H])c(c([H])c1[H])C(=O)C([H])([H])[H])C1([H])C([H])([H])C([H])([H])C([H])([H])C([H])([H])C1([H])[H]	0 (Inactive)	0	0	0
498	PUBCHEM_CID_2160	[H]C(=C1c2c([H])c([H])c([H])c([H])c2C([H])([H])C([H])([H])c2c([H])c([H])c([H])c([H])c12)C([H])([H])C([H])([H])N(C([H])([H])[H])C([H])([H])[H]	0 (Inactive)	0	0	0
499	PUBCHEM_CID_10767	[H]c1c([H])c([H])c(c([H])c1[H])C(=O)O[C@](C([H])([H])[H])(C([H])([H])N(C([H])([H])[H])C([H])([H])[H])C([H])([H])C([H])([H])[H]	0 (Inactive)	0	0	0
500	PUBCHEM_CID_2247	[H]N(c1nc2c([H])c([H])c([H])c([H])c2n1C([H])([H])c1c([H])c([H])c(F)c([H])c1[H])C1([H])C([H])([H])C([H])([H])N(C([H])([H])C([H])([H])c2c([H])c([H])c(OC([H])([H])[H])c([H])c2[H])C([H])([H])C1([H])[H]	0 (Inactive)	0	0	0
501	PUBCHEM_CID_2265	[H]c1nc2nc([H])nc(Sc3c(nc([H])n3C([H])([H])[H])[N+]([O-])=O)c2n1[H]	0 (Inactive)	0	0	0
502	PUBCHEM_CID_3476	[H]N(C(=O)N1C(=O)C(=C(C([H])([H])[H])C1([H])[H])C([H])([H])C([H])([H])[H])C([H])([H])C([H])([H])c1c([H])c([H])c(c([H])c1[H])S(=O)(=O)N([H])C(=O)N([H])[C@@]1([H])C([H])([H])C([H])([H])[C@]([H])(C([H])([H])[H])C([H])([H])C1([H])[H]	0 (Inactive)	0	0	0
503	PUBCHEM_CID_2725	[H]c1nc(c([H])c([H])c1[H])[C@]([H])(c1c([H])c([H])c(Cl)c([H])c1[H])C([H])([H])C([H])([H])N(C([H])([H])[H])C([H])([H])[H]	0 (Inactive)	0	0	0
504	PUBCHEM_CID_2733	[H]c1c([H])c2oc(=O)n([H])c2c([H])c1Cl	0 (Inactive)	0	0	0
505	PUBCHEM_CID_2764	[H]OC(=O)c1c([H])n(c2c([H])c(N3C([H])([H])C([H])([H])N([H])C([H])([H])C3([H])[H])c(F)c([H])c2c1=O)C1([H])C([H])([H])C1([H])[H]	0 (Inactive)	0	0	0
506	PUBCHEM_CID_6602476	[H]O[C@@]1([H])[C@]([H])(O[C@]([H])([C@]([H])(N([H])C(=O)[C@@]2([H])N(C([H])([H])[H])C([H])([H])[C@]([H])(C([H])([H])C([H])([H])C([H])([H])[H])C2([H])[H])[C@@]([H])(Cl)C([H])([H])[H])[C@]([H])(O[H])[C@]1([H])O[H])SC([H])([H])[H]	0 (Inactive)	0	0	0
507	PUBCHEM_CID_2353	[H]c1c([H])c2c([H])c3-c4c([H])c5OC([H])([H])Oc5c([H])c4C([H])([H])C([H])([H])[n+]3c([H])c2c(OC([H])([H])[H])c1OC([H])([H])[H]	0 (Inactive)	0	0	0
508	PUBCHEM_CID_3033	[H]OC(=O)C([H])([H])c1c([H])c([H])c([H])c([H])c1N([H])c1c(Cl)c([H])c([H])c([H])c1Cl	0 (Inactive)	0	0	0
509	PUBCHEM_CID_5411	[H]N(c1c([H])c([H])c(c([H])c1[H])C(=O)OC([H])([H])C([H])([H])N(C([H])([H])[H])C([H])([H])[H])C([H])([H])C([H])([H])C([H])([H])C([H])([H])[H]	0 (Inactive)	0	0	0
510	PUBCHEM_CID_4057	[H]OC(C(=O)O[C@]1([H])C([H])([H])C([H])([H])C([H])([H])[N+](C([H])([H])[H])(C([H])([H])[H])C1([H])[H])(c1c([H])c([H])c([H])c([H])c1[H])c1c([H])c([H])c([H])c([H])c1[H]	0 (Inactive)	0	0	0
511	PUBCHEM_CID_2554	[H]N([H])C(=O)N1c2c([H])c([H])c([H])c([H])c2C([H])=C([H])c2c([H])c([H])c([H])c([H])c12	0 (Inactive)	0	0	0
512	PUBCHEM_CID_5362	[H]OC(=O)C([H])([H])C([H])([H])C(=O)OC([H])([H])C1(C(=O)N(N(C1=O)c1c([H])c([H])c([H])c([H])c1[H])c1c([H])c([H])c([H])c([H])c1[H])C([H])([H])C([H])([H])C([H])([H])C([H])([H])[H]	0 (Inactive)	0	0	0
514	PUBCHEM_CID_10235	[H]N1C([H])([H])[C@]2([H])c3c([H])c([H])c([H])c(=O)n3C([H])([H])[C@]([H])(C1([H])[H])C2([H])[H]	0 (Inactive)	0	0	0
515	PUBCHEM_CID_24041599	[H]O[C@]12C([H])([H])[C@@]3([H])O[C@]33C(=O)O[C@]([H])([C@]4([H])OC(=O)[C@@]1([H])[C@@]4([H])C(=C([H])[H])C([H])([H])[H])[C@]23C([H])([H])[H]	0 (Inactive)	0	0	0
516	PUBCHEM_CID_28417	[H]O[C@@]1(C#C[H])C([H])([H])C([H])([H])[C@@]2([H])[C@]3([H])C([H])([H])C([H])([H])C4=C([H])c5onc([H])c5C([H])([H])[C@]4(C([H])([H])[H])[C@@]3([H])C([H])([H])C([H])([H])[C@]12C([H])([H])[H]	0 (Inactive)	0	0	0
517	PUBCHEM_CID_236702	[H]O[C@@]1([H])C([H])([H])[C@@]2(C([H])([H])[H])[C@@]([H])(C([H])([H])[C@@]([H])(C([H])([H])[H])[C@]2(O[H])C(=O)C([H])([H])OC(=O)C([H])([H])[H])[C@]2([H])C([H])([H])C([H])([H])C3=C([H])C(=O)C([H])=C([H])[C@]3(C([H])([H])[H])[C@@]12F	0 (Inactive)	0	0	0
518	PUBCHEM_CID_3100	[H]c1c([H])c([H])c(c([H])c1[H])C([H])(OC([H])([H])C([H])([H])N(C([H])([H])[H])C([H])([H])[H])c1c([H])c([H])c([H])c([H])c1[H]	0 (Inactive)	0	0	0
519	PUBCHEM_CID_3117	[H]C([H])([H])C([H])([H])N(C(=S)SSC(=S)N(C([H])([H])C([H])([H])[H])C([H])([H])C([H])([H])[H])C([H])([H])C([H])([H])[H]	0 (Inactive)	0	0	0
520	PUBCHEM_CID_71203	[H]c1c([H])c([H])c2n3c4c(c2c1[H])C([H])([H])C([H])([H])N1C([H])([H])C([H])([H])C([H])([H])[C@@](C([H])([H])C([H])([H])[H])(C([H])([H])C3=O)[C@@]41[H]	0 (Inactive)	0	0	0
521	PUBCHEM_CID_3213	[H]c1nc([H])c2c(c3c4c([H])c([H])c([H])c([H])c4n([H])c3c(c2c1[H])C([H])([H])[H])C([H])([H])[H]	0 (Inactive)	0	0	0
522	PUBCHEM_CID_10219	[H]N1C([H])([H])C([H])([H])c2c([H])c(OC([H])([H])[H])c(OC([H])([H])[H])c([H])c2[C@@]1([H])C([H])([H])[C@@]1([H])C([H])([H])[C@]2([H])N(C([H])([H])C([H])([H])c3c([H])c(OC([H])([H])[H])c(OC([H])([H])[H])c([H])c23)C([H])([H])[C@]1([H])C([H])([H])C([H])([H])[H]	0 (Inactive)	0	0	0
523	PUBCHEM_CID_442649	[H]c1nc([H])c(c([H])c1[H])C1=NC([H])([H])C([H])([H])C1([H])[H]	0 (Inactive)	0	0	0
524	PUBCHEM_CID_1892	[H]OC([H])([H])C([H])([H])n1c([H])nc2n(c(=O)n(c(=O)c12)C([H])([H])[H])C([H])([H])[H]	0 (Inactive)	0	0	0
525	PUBCHEM_CID_5353622	[H]N([H])C(=Nc1nc(c([H])s1)C([H])([H])SC([H])([H])C([H])([H])C(=N/S(=O)(=O)N([H])[H])\N([H])[H])N([H])[H]	0 (Inactive)	0	0	0
526	PUBCHEM_CID_3397	[H]N(C(=O)C([H])(C([H])([H])[H])C([H])([H])[H])c1c([H])c([H])c(c(c1[H])C(F)(F)F)[N+]([O-])=O	0 (Inactive)	0	0	0
527	PUBCHEM_CID_9651	[H]O[C@@]1([H])C([H])=C([H])[C@@]23c4c(O[C@@]2([H])C1([H])[H])c(OC([H])([H])[H])c([H])c([H])c4C([H])([H])N(C([H])([H])[H])C([H])([H])C3([H])[H]	0 (Inactive)	0	0	0
528	PUBCHEM_CID_3565	[H]Oc1c([H])c([H])c2c3c(n([H])c2c1[H])C(=NC([H])([H])C3([H])[H])C([H])([H])[H]	0 (Inactive)	0	0	0
529	PUBCHEM_CID_5281404	[H]c1nc(c2n([H])c3c([H])c([H])c([H])c([H])c3c2c1[H])C([H])([H])[H]	0 (Inactive)	0	0	0
531	PUBCHEM_CID_5282593	[H]O[C@]([H])(C(=O)O[C@@]1([H])C([H])([H])[C@@]2([H])N(C([H])([H])[H])[C@]([H])(C([H])([H])C2([H])[H])C1([H])[H])c1c([H])c([H])c([H])c([H])c1[H]	0 (Inactive)	0	0	0
532	PUBCHEM_CID_3646	[H]c1c2OC([H])([H])Oc2c(OC([H])([H])[H])c2c1C([H])([H])C([H])([H])N(C([H])([H])[H])C2([H])[H]	0 (Inactive)	0	0	0
533	PUBCHEM_CID_3658	[H]OC([H])([H])C([H])([H])OC([H])([H])C([H])([H])N1C([H])([H])C([H])([H])N(C([H])([H])C1([H])[H])[C@]([H])(c1c([H])c([H])c([H])c([H])c1[H])c1c([H])c([H])c(Cl)c([H])c1[H]	0 (Inactive)	0	0	0
535	PUBCHEM_CID_3748	[H]N(N([H])C([H])(C([H])([H])[H])C([H])([H])[H])C(=O)c1c([H])c([H])nc([H])c1[H]	0 (Inactive)	0	0	0
536	PUBCHEM_CID_3828	[H]c1oc2c(OC([H])([H])[H])c3oc(c([H])c(=O)c3c(OC([H])([H])[H])c2c1[H])C([H])([H])[H]	0 (Inactive)	0	0	0
537	PUBCHEM_CID_15548	[H]c1c([H])c(c([H])c(OC([H])([H])[H])c1OC([H])([H])[H])C([H])([H])[C@@]1([H])N(C([H])([H])[H])C([H])([H])C([H])([H])c2c([H])c(OC([H])([H])[H])c(OC([H])([H])[H])c([H])c12	0 (Inactive)	0	0	0
538	PUBCHEM_CID_101616	[H]O[C@]([H])(c1c([H])c([H])c([H])c([H])c1[H])C([H])([H])[C@@]1([H])N(C([H])([H])[H])[C@@]([H])(C([H])([H])C(=O)c2c([H])c([H])c([H])c([H])c2[H])C([H])([H])C([H])([H])C1([H])[H]	0 (Inactive)	0	0	0
539	PUBCHEM_CID_3964	[H]c1c([H])c([H])c2N=C(N3C([H])([H])C([H])([H])N(C([H])([H])[H])C([H])([H])C3([H])[H])c3c([H])c(Cl)c([H])c([H])c3Oc2c1[H]	0 (Inactive)	0	0	0
540	PUBCHEM_CID_4170	[H]N([H])S(=O)(=O)c1c([H])c2C(=O)N(c3c([H])c([H])c([H])c([H])c3C([H])([H])[H])[C@]([H])(N([H])c2c([H])c1Cl)C([H])([H])[H]	0 (Inactive)	0	0	0
541	PUBCHEM_CID_9415	[H]O[C@]1(C(=O)OC([H])([H])C2=C([H])C([H])([H])N3C([H])([H])C([H])([H])[C@@]([H])(OC(=O)[C@]([H])(C([H])([H])[H])[C@]1(O[H])C([H])([H])[H])[C@@]23[H])C([H])([H])[H]	0 (Inactive)	0	0	0
542	PUBCHEM_CID_5311304	[H]Oc1c([H])c([H])c2c3c1O[C@@]1([H])[C@@]([H])(O[H])C([H])([H])C([H])([H])[C@@]4(O[H])[C@]([H])(N(C([H])([H])C5([H])C([H])([H])C([H])([H])C5([H])[H])C([H])([H])C([H])([H])[C@]314)C2([H])[H]	0 (Inactive)	0	0	0
543	PUBCHEM_CID_5360515	[H]Oc1c([H])c([H])c2c3c1O[C@@]1([H])C(=O)C([H])([H])C([H])([H])[C@@]4(O[H])[C@]([H])(N(C([H])([H])C5([H])C([H])([H])C5([H])[H])C([H])([H])C([H])([H])[C@]314)C2([H])[H]	0 (Inactive)	0	0	0
544	PUBCHEM_CID_453131	[H]Oc1c([H])c([H])c2-c3c(OC([H])([H])[H])c(OC([H])([H])[H])c(OC([H])([H])[H])c([H])c3C([H])([H])C([H])([H])[C@]([H])(N([H])[H])c2c([H])c1=O	0 (Inactive)	0	0	0
545	PUBCHEM_CID_64945	[H]OC(=O)[C@]12C([H])([H])C([H])([H])[C@@]([H])(C([H])([H])[H])[C@]([H])(C([H])([H])[H])[C@@]1([H])C1=C([H])C([H])([H])[C@]3([H])[C@@]4(C([H])([H])[H])C([H])([H])C([H])([H])[C@]([H])(O[H])C(C([H])([H])[H])(C([H])([H])[H])[C@]4([H])C([H])([H])C([H])([H])[C@@]3(C([H])([H])[H])[C@]1(C([H])([H])[H])C([H])([H])C2([H])[H]	0 (Inactive)	0	0	0
546	PUBCHEM_CID_6604200	[H]N1C(=O)N(\N=C(/[H])c2oc(c([H])c2[H])[N+]([O-])=O)C([H])([H])C1=O	0 (Inactive)	0	0	0
547	PUBCHEM_CID_4528	[H]N([H])c1c([H])c([H])c([H])c2c1C([H])([H])N(C([H])([H])[H])C([H])([H])[C@@]2([H])c1c([H])c([H])c([H])c([H])c1[H]	0 (Inactive)	0	0	0
548	PUBCHEM_CID_19009	[H]c1c([H])c2c([H])c3-c4c([H])c(OC([H])([H])[H])c(OC([H])([H])[H])c([H])c4C([H])([H])C([H])([H])[n+]3c([H])c2c(OC([H])([H])[H])c1OC([H])([H])[H]	0 (Inactive)	0	0	0
549	PUBCHEM_CID_4680	[H]c1nc(c2c([H])c(OC([H])([H])[H])c(OC([H])([H])[H])c([H])c2c1[H])C([H])([H])c1c([H])c([H])c(OC([H])([H])[H])c(OC([H])([H])[H])c1[H]	0 (Inactive)	0	0	0
550	PUBCHEM_CID_4688	[H]C#CC([H])([H])N(C([H])([H])[H])C([H])([H])c1c([H])c([H])c([H])c([H])c1[H]	0 (Inactive)	0	0	0
551	PUBCHEM_CID_4848	[H]N1c2c([H])c([H])c([H])nc2N(C(=O)C([H])([H])N2C([H])([H])C([H])([H])N(C([H])([H])[H])C([H])([H])C2([H])[H])c2c([H])c([H])c([H])c([H])c2C1=O	0 (Inactive)	0	0	0
552	PUBCHEM_CID_5865	[H]OC([H])([H])C(=O)[C@@]1(O[H])C([H])([H])C([H])([H])[C@@]2([H])[C@]3([H])C([H])([H])C([H])([H])C4=C([H])C(=O)C([H])=C([H])[C@]4(C([H])([H])[H])[C@@]3([H])C(=O)C([H])([H])[C@]12C([H])([H])[H]	0 (Inactive)	0	0	0
553	PUBCHEM_CID_11096	[H]C([H])([H])N1[C@@]2([H])C([H])([H])C(=O)C([H])([H])[C@]1([H])C([H])([H])C([H])([H])C2([H])[H]	0 (Inactive)	0	0	0
554	PUBCHEM_CID_31307	[H]OC([H])([H])C(=O)[C@@]1(O[H])[C@]([H])(O[H])C([H])([H])[C@@]2([H])[C@]3([H])C([H])([H])C([H])([H])C4=C([H])C(=O)C([H])=C([H])[C@]4(C([H])([H])[H])[C@@]3(F)[C@@]([H])(O[H])C([H])([H])[C@]12C([H])([H])[H]	0 (Inactive)	0	0	0
555	PUBCHEM_CID_2520	[H]c1c([H])c(c([H])c(OC([H])([H])[H])c1OC([H])([H])[H])C([H])([H])C([H])([H])N(C([H])([H])[H])C([H])([H])C([H])([H])C([H])([H])[C@](C#N)(c1c([H])c([H])c(OC([H])([H])[H])c(OC([H])([H])[H])c1[H])C([H])(C([H])([H])[H])C([H])([H])[H]	0 (Inactive)	0	0	0
556	PUBCHEM_CID_5329	[H]N([H])c1c([H])c([H])c(c([H])c1[H])S(=O)(=O)N([H])c1noc(c1[H])C([H])([H])[H]	0 (Inactive)	0	0	0
557	PUBCHEM_CID_1548887	[H]OC(=O)C([H])([H])C1=C(\C(=C(/[H])c2c([H])c([H])c(c([H])c2[H])[S@@](=O)C([H])([H])[H])c2c([H])c([H])c(F)c([H])c12)C([H])([H])[H]	0 (Inactive)	0	0	0
558	PUBCHEM_CID_36314	[H]O[C@@]([H])(C(=O)O[C@]1([H])C(=C2[C@@]([H])(OC(=O)C([H])([H])[H])C(=O)[C@]3(C([H])([H])[H])[C@@]([H])(O[H])C([H])([H])[C@@]4([H])OC([H])([H])[C@@]4(OC(=O)C([H])([H])[H])[C@@]3([H])[C@]([H])(OC(=O)c3c([H])c([H])c([H])c([H])c3[H])[C@](O[H])(C1([H])[H])C2(C([H])([H])[H])C([H])([H])[H])C([H])([H])[H])[C@@]([H])(N([H])C(=O)c1c([H])c([H])c([H])c([H])c1[H])c1c([H])c([H])c([H])c([H])c1[H]	0 (Inactive)	0	0	0
559	PUBCHEM_CID_5405	[H]O[C@]([H])(c1c([H])c([H])c(c([H])c1[H])C(C([H])([H])[H])(C([H])([H])[H])C([H])([H])[H])C([H])([H])C([H])([H])C([H])([H])N1C([H])([H])C([H])([H])C([H])(C([H])([H])C1([H])[H])C(O[H])(c1c([H])c([H])c([H])c([H])c1[H])c1c([H])c([H])c([H])c([H])c1[H]	0 (Inactive)	0	0	0
560	PUBCHEM_CID_26070	[H]N([H])[C@@]1([H])C([H])([H])[C@]1([H])c1c([H])c([H])c([H])c([H])c1[H]	0 (Inactive)	0	0	0
561	PUBCHEM_CID_6713947	[H]Oc1c([H])c([H])c2c([H])c1Oc1c([H])c3c(c([H])c1OC([H])([H])[H])C([H])([H])C([H])([H])N(C([H])([H])[H])[C@@]3([H])C([H])([H])c1c([H])c([H])c([H])c(Oc3c(O[H])c(OC([H])([H])[H])c([H])c4c3[C@@]([H])(C2([H])[H])[N+](C([H])([H])[H])(C([H])([H])[H])C([H])([H])C4([H])[H])c1[H]	0 (Inactive)	0	0	0
562	PUBCHEM_CID_72131	[H]OC(=O)[C@@]1([H])[C@@]([H])(O[H])C([H])([H])C([H])([H])[C@@]2([H])C([H])([H])N3C([H])([H])C([H])([H])c4c(n([H])c5c([H])c([H])c([H])c([H])c45)[C@]3([H])C([H])([H])[C@]12[H]	0 (Inactive)	0	0	0
563	PUBCHEM_CID_2170	[H]N1C([H])([H])C([H])([H])N(C2=Nc3c([H])c([H])c([H])c([H])c3Oc3c([H])c([H])c(Cl)c([H])c23)C([H])([H])C1([H])[H]	0 (Inactive)	0	0	0
564	PUBCHEM_CID_4044	[H]OC(=O)c1c([H])c([H])c([H])c([H])c1N([H])c1c([H])c([H])c([H])c(c1C([H])([H])[H])C([H])([H])[H]	0 (Inactive)	0	0	0
565	PUBCHEM_CID_1978	[H]O[C@@]([H])(C([H])([H])Oc1c([H])c([H])c(N([H])C(=O)C([H])([H])C([H])([H])C([H])([H])[H])c([H])c1C(=O)C([H])([H])[H])C([H])([H])N([H])C([H])(C([H])([H])[H])C([H])([H])[H]	0 (Inactive)	0	0	0
566	PUBCHEM_CID_6127	[H]c1c([H])c([H])c(c([H])c1[H])C(=C1C([H])([H])C([H])([H])[N+](C([H])([H])[H])(C([H])([H])[H])C([H])([H])C1([H])[H])c1c([H])c([H])c([H])c([H])c1[H]	0 (Inactive)	0	0	0
567	PUBCHEM_CID_9549171	[H]OC([H])([H])[C@@]1([H])O[C@@]([H])(O[C@@]2([H])[C@@]([H])(O[H])[C@]([H])(O[C@@]([H])(O[C@]3([H])C([H])([H])C4=C([H])C([H])([H])[C@@]5([H])[C@]6([H])C([H])([H])[C@]7([H])N8C([H])([H])[C@@]([H])(C([H])([H])[H])C([H])([H])C([H])([H])[C@]8([H])[C@@]([H])(C([H])([H])[H])[C@]7([H])[C@@]6(C([H])([H])[H])C([H])([H])C([H])([H])[C@]5([H])[C@@]4(C([H])([H])[H])C([H])([H])C3([H])[H])[C@]2([H])O[C@]2([H])O…	0 (Inactive)	0	0	0
568	PUBCHEM_CID_5577	[H]N(C(=O)c1c([H])c(OC([H])([H])[H])c(OC([H])([H])[H])c(OC([H])([H])[H])c1[H])C([H])([H])c1c([H])c([H])c(OC([H])([H])C([H])([H])N(C([H])([H])[H])C([H])([H])[H])c([H])c1[H]	0 (Inactive)	0	0	1
569	PUBCHEM_CID_3760	[H]c1nc([H])n(c1[H])C([H])([H])[C@]([H])(OC([H])([H])c1c(Cl)c([H])c([H])c([H])c1Cl)c1c([H])c([H])c(Cl)c([H])c1Cl	0 (Inactive)	0	0	0
570	PUBCHEM_CID_4046	[H]O[C@@]([H])(c1c([H])c(nc2c(c([H])c([H])c([H])c12)C(F)(F)F)C(F)(F)F)[C@@]1([H])N([H])C([H])([H])C([H])([H])C([H])([H])C1([H])[H]	0 (Inactive)	0	0	0
571	PUBCHEM_CID_4814	[H]N(C(=O)c1c([H])c([H])c(OC([H])([H])[H])c(c1[H])C(=O)N([H])C([H])([H])c1c([H])nc([H])c([H])c1[H])C([H])([H])c1c([H])nc([H])c([H])c1[H]	0 (Inactive)	0	0	0
572	PUBCHEM_CID_10745	[H]OC(=O)c1c([H])c([H])c([H])c([H])c1OC(=O)c1c([H])c([H])c([H])c([H])c1OC(=O)C([H])([H])[H]	0 (Inactive)	0	0	0
573	PUBCHEM_CID_5281743	[H]OC([H])([H])[C@]1(O[H])C(=O)OC([H])([H])C2=C([H])C([H])([H])N3C([H])([H])C([H])([H])[C@@]([H])(OC(=O)\C(=C(\[H])C([H])([H])[H])C([H])([H])[C@@]1([H])C([H])([H])[H])[C@@]23[H]	0 (Inactive)	0	0	0
574	PUBCHEM_CID_28061	[H]O[C@]([H])(C([H])([H])Cl)C([H])([H])n1c(nc([H])c1[N+]([O-])=O)C([H])([H])[H]	0 (Inactive)	0	0	0
575	PUBCHEM_CID_4107	[H]O[C@]([H])(C([H])([H])OC(=O)N([H])[H])C([H])([H])Oc1c([H])c([H])c([H])c([H])c1OC([H])([H])[H]	0 (Inactive)	0	0	0
576	PUBCHEM_CID_8249	[H]N([H])C(\N=C(N([H])[H])N([H])[H])=N/C([H])([H])C([H])([H])c1c([H])c([H])c([H])c([H])c1[H]	0 (Inactive)	0	0	0
578	PUBCHEM_CID_5070	[H]N([H])c1nc2c([H])c([H])c(OC(F)(F)F)c([H])c2s1	0 (Inactive)	0	0	0
579	PUBCHEM_CID_643606	[H]O[C@@]1([H])C([H])([H])C([H])([H])[C@]2([H])C([H])([H])N3C([H])([H])C([H])([H])c4c(n([H])c5c([H])c([H])c([H])c([H])c45)[C@]3([H])C([H])([H])[C@]2([H])[C@]1([H])C(=O)OC([H])([H])[H]	0 (Inactive)	0	0	0
580	PUBCHEM_CID_107715	[H]O[C@@]12O[C@@](N([H])C(=O)[C@@]3([H])C([H])([H])N(C([H])([H])[H])[C@]4([H])C([H])([H])c5c([H])n([H])c6c([H])c([H])c([H])c(c56)[C@@]4([H])C3([H])[H])(C(=O)N1[C@]([H])(C(=O)N1C([H])([H])C([H])([H])C([H])([H])[C@@]21[H])C([H])([H])c1c([H])c([H])c([H])c([H])c1[H])C([H])(C([H])([H])[H])C([H])([H])[H]	0 (Inactive)	0	0	0
581	PUBCHEM_CID_197810	[H]O[C@@]1([H])C([H])([H])c2c([H])c3OC([H])([H])Oc3c([H])c2[C@@]2([H])N(C([H])([H])[H])C([H])([H])c3c4OC([H])([H])Oc4c([H])c([H])c3[C@@]12[H]	0 (Inactive)	0	0	0
582	PUBCHEM_CID_4621	[H]OC([H])([H])C([H])([H])N(C([H])([H])C(=O)N(C([H])([H])[H])C(C([H])([H])[H])(C([H])([H])[H])C([H])([H])c1c([H])c([H])c([H])c([H])c1[H])C([H])([H])C(=O)N(C([H])([H])[H])C(C([H])([H])[H])(C([H])([H])[H])C([H])([H])c1c([H])c([H])c([H])c([H])c1[H]	0 (Inactive)	0	0	0
583	PUBCHEM_CID_4761	[H]c1nc(c([H])c([H])c1[H])[C@]([H])(c1c([H])c([H])c([H])c([H])c1[H])C([H])([H])C([H])([H])N(C([H])([H])[H])C([H])([H])[H]	0 (Inactive)	0	0	0
584	PUBCHEM_CID_5504	[H]N1C(=NC([H])([H])C1([H])[H])C([H])([H])c1c([H])c([H])c([H])c([H])c1[H]	0 (Inactive)	0	0	0
585	PUBCHEM_CID_5284353	[H]O[C@@]12O[C@@](N([H])C(=O)[C@]3([H])C([H])=C4c5c([H])c([H])c([H])c6n([H])c(Br)c(c56)C([H])([H])[C@]4([H])N(C([H])([H])[H])C3([H])[H])(C(=O)N1[C@]([H])(C(=O)N1C([H])([H])C([H])([H])C([H])([H])[C@@]21[H])C([H])([H])C([H])(C([H])([H])[H])C([H])([H])[H])C([H])(C([H])([H])[H])C([H])([H])[H]	0 (Inactive)	0	0	1
586	PUBCHEM_CID_71771	[H]OC(=O)C([H])([H])OC(=O)C([H])([H])c1c([H])c([H])c([H])c([H])c1N([H])c1c(Cl)c([H])c([H])c([H])c1Cl	0 (Inactive)	0	0	0
587	PUBCHEM_CID_2448	[H]OC1(c2c([H])c([H])c(Br)c([H])c2[H])C([H])([H])C([H])([H])N(C([H])([H])C([H])([H])C([H])([H])C(=O)c2c([H])c([H])c(F)c([H])c2[H])C([H])([H])C1([H])[H]	0 (Inactive)	0	0	0
588	PUBCHEM_CID_6726	[H]c1c([H])c([H])c(c([H])c1[H])C([H])(N1C([H])([H])C([H])([H])N(C([H])([H])[H])C([H])([H])C1([H])[H])c1c([H])c([H])c([H])c([H])c1[H]	0 (Inactive)	0	0	0
589	PUBCHEM_CID_9918	[H]N(C([H])([H])[H])C([H])([H])C([H])([H])C([H])=C1c2c([H])c([H])c([H])c([H])c2C([H])=C([H])c2c([H])c([H])c([H])c([H])c12	0 (Inactive)	0	0	0
590	PUBCHEM_CID_4911	[H]OC(=O)c1c([H])c([H])c(c([H])c1[H])S(=O)(=O)N(C([H])([H])C([H])([H])C([H])([H])[H])C([H])([H])C([H])([H])C([H])([H])[H]	0 (Inactive)	0	0	0
591	PUBCHEM_CID_5430	[H]c1nc(c([H])s1)-c1nc2c([H])c([H])c([H])c([H])c2n1[H]	0 (Inactive)	0	0	0
592	PUBCHEM_CID_446541	[H]OC(=O)C([H])([H])C([H])([H])C(=C([H])C([H])([H])c1c(O[H])c2C(=O)OC([H])([H])c2c(c1OC([H])([H])[H])C([H])([H])[H])C([H])([H])[H]	0 (Inactive)	0	0	0
593	PUBCHEM_CID_4421	[H]OC(=O)c1c([H])n(c2nc(c([H])c([H])c2c1=O)C([H])([H])[H])C([H])([H])C([H])([H])[H]	0 (Inactive)	0	0	0
594	PUBCHEM_CID_2734756	[H]O[C@]([H])(c1c([H])c([H])nc2c([H])c([H])c(OC([H])([H])[H])c([H])c12)[C@@]1([H])[N@@]2C([H])([H])C([H])([H])[C@]([H])(C1([H])[H])[C@@]([H])(C([H])([H])C([H])([H])[H])C2([H])[H]	0 (Inactive)	0	0	0
595	PUBCHEM_CID_2366	[H]N(C([H])([H])[H])C([H])([H])C([H])([H])c1nc([H])c([H])c([H])c1[H]	0 (Inactive)	0	0	0
596	PUBCHEM_CID_5281004	[H]OC([H])([H])C(=O)[C@@]12O[C@@]([H])(O[C@]1([H])C([H])([H])[C@@]1([H])[C@]3([H])C([H])([H])C([H])([H])C4=C([H])C(=O)C([H])=C([H])[C@]4(C([H])([H])[H])[C@@]3([H])[C@@]([H])(O[H])C([H])([H])[C@]21C([H])([H])[H])C([H])([H])C([H])([H])C([H])([H])[H]	0 (Inactive)	0	0	0
597	PUBCHEM_CID_26757	[H]C#CC([H])([H])N(C([H])([H])[H])[C@]([H])(C([H])([H])[H])C([H])([H])c1c([H])c([H])c([H])c([H])c1[H]	0 (Inactive)	0	0	0
598	PUBCHEM_CID_5339	[H]OC(=O)c1c([H])c(\N=N\c2c([H])c([H])c(c([H])c2[H])S(=O)(=O)N([H])c2nc([H])c([H])c([H])c2[H])c([H])c([H])c1O[H]	0 (Inactive)	0	0	0
600	PUBCHEM_CID_4078	[H]c1c([H])c([H])c2N(c3c([H])c(c([H])c([H])c3Sc2c1[H])[S@@](=O)C([H])([H])[H])C([H])([H])C([H])([H])[C@@]1([H])N(C([H])([H])[H])C([H])([H])C([H])([H])C([H])([H])C1([H])[H]	0 (Inactive)	0	0	0
601	PUBCHEM_CID_4847	[H]c1c([H])c([H])n2c(nc(c(c2=O)C([H])([H])C([H])([H])N2C([H])([H])C([H])([H])C([H])(C(=O)c3c([H])c([H])c(F)c([H])c3[H])C([H])([H])C2([H])[H])C([H])([H])[H])c1[H]	0 (Inactive)	0	0	0
602	PUBCHEM_CID_10302	[H]N1C([H])([H])C([H])([H])c2c([H])c(OC([H])([H])[H])c(OC([H])([H])[H])c([H])c2[C@]1([H])C([H])([H])[H]	0 (Inactive)	0	0	0
603	PUBCHEM_CID_4754	[H]N(C(=O)C([H])([H])[H])c1c([H])c([H])c(OC([H])([H])C([H])([H])[H])c([H])c1[H]	0 (Inactive)	0	0	0
604	PUBCHEM_CID_5360788	[H]c1c([N-]C(=O)OC([H])([H])C([H])([H])[H])on[n+]1N1C([H])([H])C([H])([H])OC([H])([H])C1([H])[H]	0 (Inactive)	0	0	0
605	PUBCHEM_CID_3475	[H]N(N1C([H])([H])[C@@]2([H])C([H])([H])C([H])([H])C([H])([H])[C@@]2([H])C1([H])[H])C(=O)N([H])S(=O)(=O)c1c([H])c([H])c(c([H])c1[H])C([H])([H])[H]	0 (Inactive)	0	0	0
606	PUBCHEM_CID_21109	[H]N1C([H])([H])C([H])([H])N(C([H])([H])c2c([H])c([H])c(OC([H])([H])[H])c(OC([H])([H])[H])c2OC([H])([H])[H])C([H])([H])C1([H])[H]	0 (Inactive)	0	0	0
607	PUBCHEM_CID_5337997	[H]Oc1c([H])c([H])c(c([H])c1[H])C(=O)N([H])\N=C(/[H])c1oc(c([H])c1[H])[N+]([O-])=O	0 (Inactive)	0	0	0
608	PUBCHEM_CID_72067	[H]OC([H])([H])[C@@]1([H])O[C@@]([H])(Oc2c([H])c3c(c(OC([H])([H])[H])c2OC([H])([H])[H])-c2c([H])c([H])c(SC([H])([H])[H])c(=O)c([H])c2[C@@]([H])(N([H])C(=O)C([H])([H])[H])C([H])([H])C3([H])[H])[C@]([H])(O[H])[C@@]([H])(O[H])[C@]1([H])O[H]	0 (Inactive)	0	0	0
609	PUBCHEM_CID_72281	[H]Oc1c([H])c(O[H])c2C(=O)C([H])([H])[C@]([H])(Oc2c1[H])c1c([H])c([H])c(OC([H])([H])[H])c(O[H])c1[H]	0 (Inactive)	0	0	0
610	PUBCHEM_CID_656615	[H]OC(=O)C([H])([H])C([H])([H])[C@]1(O[H])C([H])([H])C([H])([H])[C@@]2([H])[C@]3([H])C([H])=C([H])C4=C([H])C(=O)C([H])([H])C([H])([H])[C@]4(C([H])([H])[H])[C@@]3([H])C([H])([H])C([H])([H])[C@]12C([H])([H])[H]	0 (Inactive)	0	0	0
611	PUBCHEM_CID_3678	[H]c1c([H])c([H])c(c([H])c1[H])C([H])([H])C([H])([H])C([H])([H])N(C([H])([H])C([H])([H])[H])C([H])([H])C([H])([H])C([H])([H])c1c([H])c([H])c([H])c([H])c1[H]	0 (Inactive)	0	0	0
612	PUBCHEM_CID_5742832	[H]OC(=O)C(O\N=C(/C(=O)N([H])[C@]1([H])C(=O)N([C@@]1([H])C([H])([H])[H])S(=O)(=O)O[H])c1nc(sc1[H])N([H])[H])(C([H])([H])[H])C([H])([H])[H]	0 (Inactive)	0	0	0
613	PUBCHEM_CID_6098	[H]OC(=O)[C@]1([H])N2C(=O)[C@@]([H])(N([H])C(=O)c3c(noc3C([H])([H])[H])-c3c([H])c([H])c([H])c([H])c3Cl)[C@@]2([H])SC1(C([H])([H])[H])C([H])([H])[H]	0 (Inactive)	0	0	0
614	PUBCHEM_CID_441336	[H]O[C@@]1([H])C([H])([H])[C@@]2(C([H])([H])[H])[C@@]([H])(C([H])([H])[C@@]([H])(C([H])([H])[H])[C@]2(OC(=O)c2oc([H])c([H])c2[H])C(=O)C([H])([H])Cl)[C@]2([H])C([H])([H])C([H])([H])C3=C([H])C(=O)C([H])=C([H])[C@]3(C([H])([H])[H])[C@@]12Cl	0 (Inactive)	0	0	0
616	PUBCHEM_CID_5707	[H]N(C1=NC([H])([H])C([H])([H])C([H])([H])S1)c1c(c([H])c([H])c([H])c1C([H])([H])[H])C([H])([H])[H]	0 (Inactive)	0	0	0
617	PUBCHEM_CID_3830	[H]N(c1nc([H])nc2nc([H])n([H])c12)C([H])([H])c1oc([H])c([H])c1[H]	0 (Inactive)	0	0	0
618	PUBCHEM_CID_5353	[H]c1nc2nc(n([H])c2c([H])c1[H])-c1c([H])c([H])c(c([H])c1OC([H])([H])[H])[S@@](=O)C([H])([H])[H]	0 (Inactive)	0	0	0
619	PUBCHEM_CID_6713958	[H]Oc1c([H])c([H])c(c([H])c1[H])-c1oc2c(c(O[H])c([H])c(O[H])c2c(=O)c1[H])[C@]1([H])O[C@]([H])(C([H])([H])O[H])[C@@]([H])(O[H])[C@]([H])(O[H])[C@@]1([H])O[H]	0 (Inactive)	0	0	0
620	PUBCHEM_CID_15209	[H]OC([H])([H])C(=O)[C@@]12OC(O[C@]1([H])C([H])([H])[C@@]1([H])[C@]3([H])C([H])([H])[C@]([H])(F)C4=C([H])C(=O)C([H])([H])C([H])([H])[C@]4(C([H])([H])[H])[C@@]3([H])[C@@]([H])(O[H])C([H])([H])[C@]21C([H])([H])[H])(C([H])([H])[H])C([H])([H])[H]	0 (Inactive)	0	0	0
621	PUBCHEM_CID_443943	[H]O[C@@]1([H])C([H])([H])[C@@]2(C([H])([H])[H])[C@@]([H])(C([H])([H])[C@@]3([H])OC(O[C@@]23C(=O)C([H])([H])Cl)(C([H])([H])[H])C([H])([H])[H])[C@]2([H])C([H])([H])C([H])([H])C3=C([H])C(=O)C([H])([H])C([H])([H])[C@]3(C([H])([H])[H])[C@@]12F	0 (Inactive)	0	0	0
622	PUBCHEM_CID_44483269	[H]c1c([H])c([H])c2C(=O)[C@@]([H])(C(=O)C(=O)c2c1[H])[C@@]1([H])C([H])([H])C([H])([H])[C@]([H])(c2c([H])c([H])c(Cl)c([H])c2[H])C([H])([H])C1([H])[H]	0 (Inactive)	0	0	0
623	PUBCHEM_CID_43231	[H]N([H])c1c([H])c(C(Cl)=C(Cl)Cl)c(c([H])c1S(=O)(=O)N([H])[H])S(=O)(=O)N([H])[H]	0 (Inactive)	0	0	0
624	PUBCHEM_CID_71414	[H]O[C@@]1([H])C([H])([H])[C@@]2(C([H])([H])[H])[C@@]([H])(C([H])([H])[C@]([H])(C([H])([H])[H])[C@]2(OC(=O)C([H])([H])[H])C(=O)C([H])([H])OC(=O)C([H])([H])[H])[C@]2([H])C([H])([H])[C@]([H])(F)C3=C([H])C(=O)C([H])=C([H])[C@]3(C([H])([H])[H])[C@@]12F	0 (Inactive)	0	0	0
625	PUBCHEM_CID_3105	[H]O[C@]([H])(c1c([H])c([H])c(OC(=O)C(C([H])([H])[H])(C([H])([H])[H])C([H])([H])[H])c(OC(=O)C(C([H])([H])[H])(C([H])([H])[H])C([H])([H])[H])c1[H])C([H])([H])N([H])C([H])([H])[H]	0 (Inactive)	0	0	0
626	PUBCHEM_CID_180559	[H]O[C@@]([H])(C([H])([H])Oc1c([H])c([H])c(c([H])c1[H])C([H])([H])C(=O)N([H])[H])C([H])([H])N([H])C([H])(C([H])([H])[H])C([H])([H])[H]	0 (Inactive)	0	0	0
627	PUBCHEM_CID_5280804	[H]Oc1c([H])c(O[H])c2c(oc(-c3c([H])c([H])c(O[H])c(O[H])c3[H])c(O[C@]3([H])O[C@]([H])(C([H])([H])O[H])[C@@]([H])(O[H])[C@]([H])(O[H])[C@@]3([H])O[H])c2=O)c1[H]	0 (Inactive)	0	0	0
628	PUBCHEM_CID_72344	[H]c1c([H])c(c([H])c(OC([H])([H])[H])c1OC([H])([H])[H])-c1oc2c(OC([H])([H])[H])c(OC([H])([H])[H])c(OC([H])([H])[H])c(OC([H])([H])[H])c2c(=O)c1[H]	0 (Inactive)	0	0	0
629	PUBCHEM_CID_86	[H]OC(=O)c1c([H])c([H])c([H])c(O[H])c1N([H])[H]	0 (Inactive)	0	0	0
630	PUBCHEM_CID_22407	[H]N1C([H])([H])[C@]2([H])c3c([H])c([H])c([H])c(=O)n3C([H])([H])[C@]([H])(C1([H])[H])C2([H])[H]	0 (Inactive)	0	0	0
631	PUBCHEM_CID_10168	[H]OC(=O)c1c([H])c(O[H])c2C(=O)c3c(O[H])c([H])c([H])c([H])c3C(=O)c2c1[H]	0 (Inactive)	0	0	0
633	PUBCHEM_CID_44483363	[H]OC([H])([H])[C@]([H])(N1C(=O)c2c([H])c(N([H])S(=O)(=O)c3c([H])c([H])c(c([H])c3[H])C([H])([H])[H])c([H])c([H])c2O[C@]([H])(C([H])([H])N(C([H])([H])[H])C([H])([H])c2c([H])c([H])nc([H])c2[H])[C@@]([H])(C([H])([H])[H])C1([H])[H])C([H])([H])[H]	0 (Inactive)	0	0	0
634	PUBCHEM_CID_44202611	[H]OC([H])([H])[C@]([H])(N1C(=O)c2c([H])c(N([H])C(=O)C([H])([H])n3nnnc3[H])c([H])c([H])c2O[C@]([H])(C([H])([H])N(C([H])([H])[H])S(=O)(=O)c2c([H])c([H])c(OC([H])([H])[H])c([H])c2[H])[C@@]([H])(C([H])([H])[H])C1([H])[H])C([H])([H])[H]	0 (Inactive)	0	0	0
635	PUBCHEM_CID_44483364	[H]OC([H])([H])[C@]([H])(N1C(=O)c2c([H])c(N([H])S(=O)(=O)c3c([H])c([H])c(OC([H])([H])[H])c([H])c3[H])c([H])c([H])c2O[C@]([H])(C([H])([H])N(C([H])([H])[H])C([H])([H])c2c([H])c([H])c(c([H])c2[H])-c2c([H])c([H])c([H])c([H])c2[H])[C@@]([H])(C([H])([H])[H])C1([H])[H])C([H])([H])[H]	0 (Inactive)	0	0	0
636	PUBCHEM_CID_44202775	[H]OC([H])([H])[C@]([H])(N1C(=O)c2c([H])c(N([H])C(=O)N([H])c3c(noc3C([H])([H])[H])C([H])([H])[H])c([H])c([H])c2O[C@]([H])(C([H])([H])N(C([H])([H])[H])S(=O)(=O)c2c([H])c([H])c(OC([H])([H])[H])c([H])c2[H])[C@@]([H])(C([H])([H])[H])C1([H])[H])C([H])([H])[H]	0 (Inactive)	0	0	0
637	PUBCHEM_CID_44483365	[H]OC([H])([H])[C@]([H])(N1C(=O)c2c([H])c(N([H])S(=O)(=O)c3c([H])c([H])c(F)c([H])c3[H])c([H])c([H])c2O[C@]([H])(C([H])([H])N(C([H])([H])[H])C([H])([H])c2c([H])c([H])c(c([H])c2[H])C(F)(F)F)[C@@]([H])(C([H])([H])[H])C1([H])[H])C([H])([H])[H]	0 (Inactive)	0	0	0
638	PUBCHEM_CID_44483366	[H]OC([H])([H])[C@]([H])(N1C(=O)c2c([H])c(N([H])S(=O)(=O)c3nc([H])n(c3[H])C([H])([H])[H])c([H])c([H])c2O[C@]([H])(C([H])([H])N(C([H])([H])[H])C([H])([H])C2([H])C([H])([H])C([H])([H])C([H])([H])C([H])([H])C2([H])[H])[C@@]([H])(C([H])([H])[H])C1([H])[H])C([H])([H])[H]	0 (Inactive)	0	0	0
639	PUBCHEM_CID_44202314	[H]OC([H])([H])[C@]([H])(N1C(=O)c2c([H])c(N([H])S(=O)(=O)c3c([H])c([H])c(F)c([H])c3[H])c([H])c([H])c2O[C@]([H])(C([H])([H])N(C([H])([H])[H])S(=O)(=O)c2c([H])c([H])c(F)c([H])c2[H])[C@@]([H])(C([H])([H])[H])C1([H])[H])C([H])([H])[H]	0 (Inactive)	0	0	0
640	PUBCHEM_CID_44483367	[H]OC([H])([H])[C@]([H])(N1C(=O)c2c([H])c(N([H])C(=O)C([H])([H])c3c([H])n(c4c([H])c([H])c([H])c([H])c34)C([H])([H])[H])c([H])c([H])c2O[C@]([H])(C([H])([H])N(C(=O)N([H])C([H])(C([H])([H])[H])C([H])([H])[H])C([H])([H])[H])[C@@]([H])(C([H])([H])[H])C1([H])[H])C([H])([H])[H]	0 (Inactive)	0	0	0
641	PUBCHEM_CID_44483368	[H]OC([H])([H])[C@]([H])(N1C(=O)c2c([H])c(N([H])C(=O)N([H])C([H])(C([H])([H])[H])C([H])([H])[H])c([H])c([H])c2O[C@]([H])(C([H])([H])N(C([H])([H])[H])C([H])([H])c2c([H])c([H])c(Cl)c(Cl)c2[H])[C@@]([H])(C([H])([H])[H])C1([H])[H])C([H])([H])[H]	0 (Inactive)	0	0	0
642	PUBCHEM_CID_44483369	[H]OC([H])([H])[C@]([H])(N1C(=O)c2c([H])c(N([H])C(=O)N([H])C([H])(C([H])([H])[H])C([H])([H])[H])c([H])c([H])c2O[C@]([H])(C([H])([H])N(C([H])([H])[H])C([H])([H])c2c([H])c([H])c([H])c([H])c2[H])[C@@]([H])(C([H])([H])[H])C1([H])[H])C([H])([H])[H]	0 (Inactive)	0	0	0
643	PUBCHEM_CID_44483370	[H]OC([H])([H])[C@]([H])(N1C(=O)c2c([H])c(N([H])S(=O)(=O)c3c([H])c([H])c(c([H])c3[H])C([H])([H])[H])c([H])c([H])c2O[C@]([H])(C([H])([H])N(C([H])([H])[H])S(=O)(=O)c2c([H])c([H])c(F)c([H])c2[H])[C@@]([H])(C([H])([H])[H])C1([H])[H])C([H])([H])[H]	0 (Inactive)	0	0	0
644	PUBCHEM_CID_44483371	[H]OC([H])([H])[C@]([H])(N1C(=O)c2c([H])c(N([H])C(=O)N([H])C3([H])C([H])([H])C([H])([H])C([H])([H])C([H])([H])C3([H])[H])c([H])c([H])c2O[C@]([H])(C([H])([H])N(C([H])([H])[H])C([H])([H])c2c([H])c([H])c(Cl)c(Cl)c2[H])[C@@]([H])(C([H])([H])[H])C1([H])[H])C([H])([H])[H]	0 (Inactive)	0	0	0
645	PUBCHEM_CID_44483372	[H]OC([H])([H])[C@]([H])(N1C(=O)c2c([H])c(N([H])C(=O)N([H])c3c([H])c([H])c(F)c([H])c3[H])c([H])c([H])c2O[C@]([H])(C([H])([H])N(C([H])([H])[H])C([H])([H])c2c([H])c([H])c(Cl)c(Cl)c2[H])[C@@]([H])(C([H])([H])[H])C1([H])[H])C([H])([H])[H]	0 (Inactive)	0	0	0
646	PUBCHEM_CID_44202794	[H]OC([H])([H])[C@]([H])(N1C(=O)c2c([H])c(N([H])C(=O)c3c([H])c([H])nc([H])c3[H])c([H])c([H])c2O[C@]([H])(C([H])([H])N(C(=O)N([H])c2c([H])c([H])c(c([H])c2[H])C(F)(F)F)C([H])([H])[H])[C@@]([H])(C([H])([H])[H])C1([H])[H])C([H])([H])[H]	0 (Inactive)	0	0	0
647	PUBCHEM_CID_44202019	[H]OC([H])([H])[C@]([H])(N1C(=O)c2c([H])c(N([H])C(=O)C3([H])C([H])([H])C3([H])[H])c([H])c([H])c2O[C@]([H])(C([H])([H])N(C(=O)N([H])C2([H])C([H])([H])C([H])([H])C([H])([H])C([H])([H])C2([H])[H])C([H])([H])[H])[C@@]([H])(C([H])([H])[H])C1([H])[H])C([H])([H])[H]	0 (Inactive)	0	0	0
648	PUBCHEM_CID_44483373	[H]OC([H])([H])[C@]([H])(N1C(=O)c2c([H])c(N([H])C(=O)N([H])c3c([H])c([H])c(OC([H])([H])[H])c([H])c3[H])c([H])c([H])c2O[C@]([H])(C([H])([H])N(C([H])([H])[H])C([H])([H])c2c([H])c([H])nc([H])c2[H])[C@@]([H])(C([H])([H])[H])C1([H])[H])C([H])([H])[H]	0 (Inactive)	0	0	0
649	PUBCHEM_CID_44483374	[H]OC([H])([H])[C@]([H])(N1C(=O)c2c([H])c(N([H])C(=O)N([H])c3c([H])c([H])c(F)c([H])c3[H])c([H])c([H])c2O[C@]([H])(C([H])([H])N(C([H])([H])[H])S(=O)(=O)c2c([H])c([H])c([H])c([H])c2[H])[C@@]([H])(C([H])([H])[H])C1([H])[H])C([H])([H])[H]	0 (Inactive)	0	0	0
650	PUBCHEM_CID_44483375	[H]OC([H])([H])[C@]([H])(N1C(=O)c2c([H])c(N([H])C(=O)c3c([H])c([H])nc([H])c3[H])c([H])c([H])c2O[C@]([H])(C([H])([H])N(C(=O)N([H])c2c([H])c([H])c(F)c([H])c2[H])C([H])([H])[H])[C@@]([H])(C([H])([H])[H])C1([H])[H])C([H])([H])[H]	0 (Inactive)	0	0	0
651	PUBCHEM_CID_44483376	[H]OC([H])([H])[C@]([H])(N1C(=O)c2c([H])c(N([H])S(=O)(=O)c3nc([H])n(c3[H])C([H])([H])[H])c([H])c([H])c2O[C@]([H])(C([H])([H])N(C([H])([H])[H])C([H])([H])[H])[C@@]([H])(C([H])([H])[H])C1([H])[H])C([H])([H])[H]	0 (Inactive)	0	0	0
652	PUBCHEM_CID_44202959	[H]OC([H])([H])[C@]([H])(N1C(=O)c2c([H])c(N([H])C(=O)N([H])c3c([H])c([H])c(OC([H])([H])[H])c([H])c3[H])c([H])c([H])c2O[C@]([H])(C([H])([H])N(C([H])([H])[H])S(=O)(=O)c2c([H])c([H])c(OC([H])([H])[H])c([H])c2[H])[C@@]([H])(C([H])([H])[H])C1([H])[H])C([H])([H])[H]	0 (Inactive)	0	0	0
653	PUBCHEM_CID_44483377	[H]OC([H])([H])[C@]([H])(N1C(=O)c2c([H])c(N([H])S(=O)(=O)c3c([H])c([H])c(Cl)c([H])c3[H])c([H])c([H])c2O[C@]([H])(C([H])([H])N(C(=O)N([H])c2c([H])c([H])c3OC([H])([H])Oc3c2[H])C([H])([H])[H])[C@@]([H])(C([H])([H])[H])C1([H])[H])C([H])([H])[H]	0 (Inactive)	0	0	0
654	PUBCHEM_CID_44483378	[H]OC([H])([H])[C@]([H])(N1C(=O)c2c([H])c(N([H])S(=O)(=O)c3c([H])c([H])c(c([H])c3[H])C([H])([H])[H])c([H])c([H])c2O[C@]([H])(C([H])([H])N(C(=O)N([H])C2([H])C([H])([H])C([H])([H])C([H])([H])C([H])([H])C2([H])[H])C([H])([H])[H])[C@@]([H])(C([H])([H])[H])C1([H])[H])C([H])([H])[H]	0 (Inactive)	0	0	0
655	PUBCHEM_CID_44483379	[H]OC([H])([H])[C@]([H])(N1C(=O)c2c([H])c(N([H])S(=O)(=O)c3nc([H])n(c3[H])C([H])([H])[H])c([H])c([H])c2O[C@@]([H])(C([H])([H])N(C(=O)N([H])c2c([H])c([H])c(c([H])c2[H])C(F)(F)F)C([H])([H])[H])[C@]([H])(C([H])([H])[H])C1([H])[H])C([H])([H])[H]	0 (Inactive)	0	0	0
656	PUBCHEM_CID_44483380	[H]OC([H])([H])[C@]([H])(N1C(=O)c2c([H])c(N([H])C(=O)C([H])([H])c3c([H])n(c4c([H])c([H])c([H])c([H])c34)C([H])([H])[H])c([H])c([H])c2O[C@@]([H])(C([H])([H])N(C(=O)N([H])c2c([H])c([H])c(OC([H])([H])[H])c([H])c2[H])C([H])([H])[H])[C@]([H])(C([H])([H])[H])C1([H])[H])C([H])([H])[H]	0 (Inactive)	0	0	0
657	PUBCHEM_CID_44483381	[H]OC([H])([H])[C@@]([H])(N1C(=O)c2c([H])c(N([H])S(=O)(=O)c3c([H])c([H])c(Cl)c([H])c3[H])c([H])c([H])c2O[C@]([H])(C([H])([H])N(C([H])([H])[H])C([H])([H])c2c([H])c([H])c([H])c([H])c2[H])[C@@]([H])(C([H])([H])[H])C1([H])[H])C([H])([H])[H]	0 (Inactive)	0	0	0
658	PUBCHEM_CID_44483382	[H]OC([H])([H])[C@]([H])(N1C(=O)c2c([H])c(N([H])S(=O)(=O)c3c([H])c([H])c(c([H])c3[H])C([H])([H])[H])c([H])c([H])c2O[C@@]([H])(C([H])([H])N(C([H])([H])[H])S(=O)(=O)c2c([H])c([H])c(Cl)c([H])c2[H])[C@]([H])(C([H])([H])[H])C1([H])[H])C([H])([H])[H]	0 (Inactive)	0	0	0
659	PUBCHEM_CID_44483383	[H]OC([H])([H])[C@]([H])(N1C(=O)c2c([H])c(N([H])S(=O)(=O)c3c([H])c([H])c(F)c([H])c3[H])c([H])c([H])c2O[C@@]([H])(C([H])([H])N(C([H])([H])[H])S(=O)(=O)c2c([H])c([H])c([H])c([H])c2[H])[C@]([H])(C([H])([H])[H])C1([H])[H])C([H])([H])[H]	0 (Inactive)	0	0	0
660	PUBCHEM_CID_44483384	[H]OC([H])([H])[C@]([H])(N1C(=O)c2c([H])c(N([H])C(=O)N([H])c3c([H])c([H])c([H])c4c([H])c([H])c([H])c([H])c34)c([H])c([H])c2O[C@@]([H])(C([H])([H])N(C([H])([H])[H])S(=O)(=O)c2nc([H])n(c2[H])C([H])([H])[H])[C@]([H])(C([H])([H])[H])C1([H])[H])C([H])([H])[H]	0 (Inactive)	0	0	0
661	PUBCHEM_CID_44483385	[H]OC([H])([H])[C@]([H])(N1C(=O)c2c([H])c(N([H])C(=O)C([H])([H])c3c([H])n(c4c([H])c([H])c([H])c([H])c34)C([H])([H])[H])c([H])c([H])c2O[C@@]([H])(C([H])([H])N(C([H])([H])[H])S(=O)(=O)c2c([H])c([H])c([H])c([H])c2[H])[C@]([H])(C([H])([H])[H])C1([H])[H])C([H])([H])[H]	0 (Inactive)	0	0	0
662	PUBCHEM_CID_44483386	[H]OC([H])([H])[C@]([H])(N1C(=O)c2c([H])c(N([H])S(=O)(=O)c3c([H])c([H])c(Cl)c([H])c3[H])c([H])c([H])c2O[C@@]([H])(C([H])([H])N(C([H])([H])[H])S(=O)(=O)c2c([H])c([H])c(OC([H])([H])[H])c([H])c2[H])[C@]([H])(C([H])([H])[H])C1([H])[H])C([H])([H])[H]	0 (Inactive)	0	0	0
663	PUBCHEM_CID_44483387	[H]OC([H])([H])[C@]([H])(N1C(=O)c2c([H])c(N([H])C(=O)C([H])([H])c3c([H])n(c4c([H])c([H])c([H])c([H])c34)C([H])([H])[H])c([H])c([H])c2O[C@@]([H])(C([H])([H])N(C([H])([H])[H])C([H])([H])c2c([H])c([H])c(c([H])c2[H])C(F)(F)F)[C@]([H])(C([H])([H])[H])C1([H])[H])C([H])([H])[H]	0 (Inactive)	0	0	0
664	PUBCHEM_CID_44483388	[H]OC([H])([H])[C@]([H])(N1C(=O)c2c([H])c(N([H])C(=O)C([H])([H])C([H])([H])N3C([H])([H])C([H])([H])OC([H])([H])C3([H])[H])c([H])c([H])c2O[C@@]([H])(C([H])([H])N(C([H])([H])[H])S(=O)(=O)c2nc([H])n(c2[H])C([H])([H])[H])[C@]([H])(C([H])([H])[H])C1([H])[H])C([H])([H])[H]	0 (Inactive)	0	0	0
665	PUBCHEM_CID_44483389	[H]OC([H])([H])[C@]([H])(N1C(=O)c2c([H])c(N([H])C(=O)C3([H])C([H])([H])C([H])([H])C([H])([H])C([H])([H])C3([H])[H])c([H])c([H])c2O[C@@]([H])(C([H])([H])N(C(=O)N([H])c2c([H])c([H])c3OC([H])([H])Oc3c2[H])C([H])([H])[H])[C@]([H])(C([H])([H])[H])C1([H])[H])C([H])([H])[H]	0 (Inactive)	0	0	0
666	PUBCHEM_CID_44483390	[H]OC([H])([H])[C@]([H])(N1C(=O)c2c([H])c(N([H])S(=O)(=O)c3c([H])c([H])c(OC([H])([H])[H])c([H])c3[H])c([H])c([H])c2O[C@@]([H])(C([H])([H])N(C(=O)N([H])C2([H])C([H])([H])C([H])([H])C([H])([H])C([H])([H])C2([H])[H])C([H])([H])[H])[C@]([H])(C([H])([H])[H])C1([H])[H])C([H])([H])[H]	0 (Inactive)	0	0	0
667	PUBCHEM_CID_44483391	[H]OC([H])([H])[C@]([H])(N1C(=O)c2c([H])c(N([H])S(=O)(=O)c3sc([H])c([H])c3[H])c([H])c([H])c2O[C@@]([H])(C([H])([H])N(C([H])([H])[H])S(=O)(=O)c2c([H])c([H])c(OC([H])([H])[H])c([H])c2[H])[C@]([H])(C([H])([H])[H])C1([H])[H])C([H])([H])[H]	0 (Inactive)	0	0	0
668	PUBCHEM_CID_44483392	[H]OC([H])([H])[C@]([H])(N1C(=O)c2c([H])c(N([H])S(=O)(=O)c3sc([H])c([H])c3[H])c([H])c([H])c2O[C@@]([H])(C([H])([H])N(C(=O)N([H])C([H])(C([H])([H])[H])C([H])([H])[H])C([H])([H])[H])[C@]([H])(C([H])([H])[H])C1([H])[H])C([H])([H])[H]	0 (Inactive)	0	0	0
669	PUBCHEM_CID_44483393	[H]OC([H])([H])[C@]([H])(N1C(=O)c2c([H])c(N([H])C(=O)C([H])([H])c3c([H])n(c4c([H])c([H])c([H])c([H])c34)C([H])([H])[H])c([H])c([H])c2O[C@@]([H])(C([H])([H])N(C([H])([H])[H])C([H])([H])c2c([H])c([H])c3OC([H])([H])Oc3c2[H])[C@]([H])(C([H])([H])[H])C1([H])[H])C([H])([H])[H]	0 (Inactive)	0	0	0
670	PUBCHEM_CID_44483394	[H]OC([H])([H])[C@]([H])(N1C(=O)c2c([H])c(N([H])S(=O)(=O)c3sc([H])c([H])c3[H])c([H])c([H])c2O[C@@]([H])(C([H])([H])N(C([H])([H])[H])C([H])([H])c2c([H])c([H])c(Cl)c(Cl)c2[H])[C@]([H])(C([H])([H])[H])C1([H])[H])C([H])([H])[H]	0 (Inactive)	0	0	0
671	PUBCHEM_CID_44483395	[H]OC([H])([H])[C@]([H])(N1C(=O)c2c([H])c(N([H])C(=O)N([H])c3c([H])c([H])c(OC([H])([H])[H])c([H])c3[H])c([H])c([H])c2O[C@@]([H])(C([H])([H])N(C([H])([H])[H])C([H])([H])c2c([H])c([H])c(Cl)c(Cl)c2[H])[C@]([H])(C([H])([H])[H])C1([H])[H])C([H])([H])[H]	0 (Inactive)	0	0	0
672	PUBCHEM_CID_44483396	[H]OC([H])([H])[C@]([H])(N1C(=O)c2c([H])c(N([H])C(=O)N([H])c3c([H])c([H])c(F)c([H])c3[H])c([H])c([H])c2O[C@@]([H])(C([H])([H])N(C([H])([H])[H])C([H])([H])c2c([H])c([H])c3OC([H])([H])Oc3c2[H])[C@]([H])(C([H])([H])[H])C1([H])[H])C([H])([H])[H]	0 (Inactive)	0	0	0
673	PUBCHEM_CID_44483397	[H]OC(=O)c1c([H])c([H])c(c([H])c1[H])C([H])([H])N(C([H])([H])[H])C([H])([H])[C@]1([H])Oc2c([H])c([H])c(N([H])S(=O)(=O)c3c([H])c([H])c(OC([H])([H])[H])c([H])c3[H])c([H])c2C(=O)N(C([H])([H])[C@@]1([H])C([H])([H])[H])[C@]([H])(C([H])([H])[H])C([H])([H])O[H]	0 (Inactive)	0	0	0
674	PUBCHEM_CID_44483398	[H]OC([H])([H])[C@]([H])(N1C(=O)c2c([H])c(N([H])S(=O)(=O)c3c([H])c([H])c(Cl)c([H])c3[H])c([H])c([H])c2O[C@@]([H])(C([H])([H])N(C([H])([H])[H])S(=O)(=O)c2c([H])c([H])c(F)c([H])c2[H])[C@]([H])(C([H])([H])[H])C1([H])[H])C([H])([H])[H]	0 (Inactive)	0	0	0
675	PUBCHEM_CID_44483399	[H]OC([H])([H])[C@]([H])(N1C(=O)c2c([H])c(N([H])S(=O)(=O)c3c([H])c([H])c(F)c([H])c3[H])c([H])c([H])c2O[C@@]([H])(C([H])([H])N(C([H])([H])[H])S(=O)(=O)c2c([H])c([H])c(OC([H])([H])[H])c([H])c2[H])[C@]([H])(C([H])([H])[H])C1([H])[H])C([H])([H])[H]	0 (Inactive)	0	0	0
676	PUBCHEM_CID_44483400	[H]OC([H])([H])[C@]([H])(N1C(=O)c2c([H])c(N([H])S(=O)(=O)c3c([H])c([H])c(c([H])c3[H])C([H])([H])[H])c([H])c([H])c2O[C@@]([H])(C([H])([H])N(C(=O)N([H])c2c([H])c([H])c(F)c([H])c2[H])C([H])([H])[H])[C@]([H])(C([H])([H])[H])C1([H])[H])C([H])([H])[H]	0 (Inactive)	0	0	0
677	PUBCHEM_CID_44483401	[H]OC([H])([H])[C@]([H])(N1C(=O)c2c([H])c(N([H])S(=O)(=O)c3nc([H])n(c3[H])C([H])([H])[H])c([H])c([H])c2O[C@@]([H])(C([H])([H])N(C([H])([H])[H])S(=O)(=O)c2c([H])c([H])c(F)c([H])c2[H])[C@]([H])(C([H])([H])[H])C1([H])[H])C([H])([H])[H]	0 (Inactive)	0	0	0
678	PUBCHEM_CID_44483402	[H]OC([H])([H])[C@]([H])(N1C(=O)c2c([H])c(N([H])S(=O)(=O)c3c([H])c([H])c(Cl)c([H])c3[H])c([H])c([H])c2O[C@@]([H])(C([H])([H])N(C([H])([H])[H])C([H])([H])c2c([H])c([H])c(Cl)c(Cl)c2[H])[C@]([H])(C([H])([H])[H])C1([H])[H])C([H])([H])[H]	0 (Inactive)	0	0	0
679	PUBCHEM_CID_44483403	[H]OC([H])([H])[C@]([H])(N1C(=O)c2c([H])c(N([H])C(=O)N([H])c3c([H])c([H])c([H])c4c([H])c([H])c([H])c([H])c34)c([H])c([H])c2O[C@@]([H])(C([H])([H])N(C([H])([H])[H])C([H])([H])C2([H])C([H])([H])C([H])([H])C([H])([H])C([H])([H])C2([H])[H])[C@]([H])(C([H])([H])[H])C1([H])[H])C([H])([H])[H]	0 (Inactive)	0	0	0
680	PUBCHEM_CID_44483404	[H]OC([H])([H])[C@]([H])(N1C(=O)c2c([H])c(N([H])S(=O)(=O)c3c(noc3C([H])([H])[H])C([H])([H])[H])c([H])c([H])c2O[C@@]([H])(C([H])([H])N(C([H])([H])[H])C([H])([H])c2c([H])c([H])c(c([H])c2[H])C(F)(F)F)[C@]([H])(C([H])([H])[H])C1([H])[H])C([H])([H])[H]	0 (Inactive)	0	0	0
681	PUBCHEM_CID_44202039	[H]OC([H])([H])[C@]([H])(N1C(=O)c2c([H])c(N([H])C(=O)N([H])c3c([H])c([H])c([H])c4c([H])c([H])c([H])c([H])c34)c([H])c([H])c2O[C@@]([H])(C([H])([H])N(C([H])([H])[H])C([H])([H])c2c([H])c([H])c(c([H])c2[H])C(F)(F)F)[C@]([H])(C([H])([H])[H])C1([H])[H])C([H])([H])[H]	0 (Inactive)	0	0	0
682	PUBCHEM_CID_44483405	[H]OC([H])([H])[C@]([H])(N1C(=O)c2c([H])c(N([H])S(=O)(=O)c3c([H])c([H])c(F)c([H])c3[H])c([H])c([H])c2O[C@@]([H])(C([H])([H])N(C([H])([H])[H])C([H])([H])c2c([H])c([H])c(c([H])c2[H])-c2c([H])c([H])c([H])c([H])c2[H])[C@]([H])(C([H])([H])[H])C1([H])[H])C([H])([H])[H]	0 (Inactive)	0	0	0
683	PUBCHEM_CID_44483406	[H]OC([H])([H])[C@]([H])(N1C(=O)c2c([H])c(N([H])C(=O)C([H])([H])c3c([H])n(c4c([H])c([H])c([H])c([H])c34)C([H])([H])[H])c([H])c([H])c2O[C@@]([H])(C([H])([H])N(C([H])([H])[H])S(=O)(=O)c2c([H])c([H])c(Cl)c([H])c2[H])[C@]([H])(C([H])([H])[H])C1([H])[H])C([H])([H])[H]	0 (Inactive)	0	0	0
684	PUBCHEM_CID_44483407	[H]OC([H])([H])[C@]([H])(N1C(=O)c2c([H])c(N([H])C(=O)N([H])C3([H])C([H])([H])C([H])([H])C([H])([H])C([H])([H])C3([H])[H])c([H])c([H])c2O[C@@]([H])(C([H])([H])N(C([H])([H])[H])C([H])([H])c2c([H])c([H])c(Oc3c([H])c([H])c([H])c([H])c3[H])c([H])c2[H])[C@]([H])(C([H])([H])[H])C1([H])[H])C([H])([H])[H]	0 (Inactive)	0	0	0
685	PUBCHEM_CID_44483408	[H]OC([H])([H])[C@]([H])(N1C(=O)c2c([H])c(N([H])S(=O)(=O)c3c([H])c([H])c(OC([H])([H])[H])c([H])c3[H])c([H])c([H])c2O[C@@]([H])(C([H])([H])N(C(=O)N([H])c2c([H])c([H])c3OC([H])([H])Oc3c2[H])C([H])([H])[H])[C@]([H])(C([H])([H])[H])C1([H])[H])C([H])([H])[H]	0 (Inactive)	0	0	0
686	PUBCHEM_CID_44483409	[H]OC([H])([H])[C@]([H])(N1C(=O)c2c([H])c(N([H])C(=O)C([H])([H])n3nnnc3[H])c([H])c([H])c2O[C@@]([H])(C([H])([H])N(C([H])([H])[H])C([H])([H])c2c([H])c([H])c(Oc3c([H])c([H])c([H])c([H])c3[H])c([H])c2[H])[C@]([H])(C([H])([H])[H])C1([H])[H])C([H])([H])[H]	0 (Inactive)	0	0	0
687	PUBCHEM_CID_44483410	[H]OC([H])([H])[C@]([H])(N1C(=O)c2c([H])c(N([H])S(=O)(=O)c3c([H])c([H])c(OC([H])([H])[H])c([H])c3[H])c([H])c([H])c2O[C@@]([H])(C([H])([H])N(C([H])([H])[H])C([H])([H])c2c([H])c([H])c(c([H])c2[H])C(F)(F)F)[C@]([H])(C([H])([H])[H])C1([H])[H])C([H])([H])[H]	0 (Inactive)	0	0	0
688	PUBCHEM_CID_44483411	[H]OC([H])([H])[C@]([H])(N1C(=O)c2c([H])c(N([H])S(=O)(=O)c3nc([H])n(c3[H])C([H])([H])[H])c([H])c([H])c2O[C@@]([H])(C([H])([H])N(C([H])([H])[H])C([H])([H])c2c([H])c([H])c(Oc3c([H])c([H])c([H])c([H])c3[H])c([H])c2[H])[C@]([H])(C([H])([H])[H])C1([H])[H])C([H])([H])[H]	0 (Inactive)	0	0	0
689	PUBCHEM_CID_44202907	[H]OC([H])([H])[C@]([H])(N1C(=O)c2c([H])c(N([H])C(=O)C([H])([H])c3c([H])c([H])c([H])c([H])c3[H])c([H])c([H])c2O[C@@]([H])(C([H])([H])N(C([H])([H])[H])C([H])([H])c2c([H])c([H])c(Oc3c([H])c([H])c([H])c([H])c3[H])c([H])c2[H])[C@]([H])(C([H])([H])[H])C1([H])[H])C([H])([H])[H]	0 (Inactive)	0	0	0
690	PUBCHEM_CID_44483412	[H]OC([H])([H])[C@]([H])(N1C(=O)c2c([H])c(N([H])S(=O)(=O)c3nc([H])n(c3[H])C([H])([H])[H])c([H])c([H])c2O[C@@]([H])(C([H])([H])N(C(=O)N([H])c2c([H])c([H])c(F)c([H])c2[H])C([H])([H])[H])[C@]([H])(C([H])([H])[H])C1([H])[H])C([H])([H])[H]	0 (Inactive)	0	0	0
691	PUBCHEM_CID_44483413	[H]OC([H])([H])[C@]([H])(N1C(=O)c2c([H])c(N([H])S(=O)(=O)c3c(noc3C([H])([H])[H])C([H])([H])[H])c([H])c([H])c2O[C@@]([H])(C([H])([H])N(C(=O)N([H])C2([H])C([H])([H])C([H])([H])C([H])([H])C([H])([H])C2([H])[H])C([H])([H])[H])[C@]([H])(C([H])([H])[H])C1([H])[H])C([H])([H])[H]	0 (Inactive)	0	0	0
692	PUBCHEM_CID_44483414	[H]OC([H])([H])[C@]([H])(N1C(=O)c2c([H])c(N([H])C(=O)N([H])c3c(noc3C([H])([H])[H])C([H])([H])[H])c([H])c([H])c2O[C@@]([H])(C([H])([H])N([H])C([H])([H])[H])[C@]([H])(C([H])([H])[H])C1([H])[H])C([H])([H])[H]	0 (Inactive)	0	0	0
693	PUBCHEM_CID_44483415	[H]OC([H])([H])[C@]([H])(N1C(=O)c2c([H])c(N([H])C(=O)C([H])([H])C([H])([H])C(F)(F)F)c([H])c([H])c2O[C@@]([H])(C([H])([H])N(C(=O)N([H])c2c([H])c([H])c([H])c3c([H])c([H])c([H])c([H])c23)C([H])([H])[H])[C@]([H])(C([H])([H])[H])C1([H])[H])C([H])([H])[H]	0 (Inactive)	0	0	0
694	PUBCHEM_CID_44483416	[H]OC(=O)c1c([H])c([H])c(c([H])c1[H])C([H])([H])N(C([H])([H])[H])C([H])([H])[C@]1([H])Oc2c([H])c([H])c(N([H])C(=O)N([H])c3c([H])c([H])c([H])c4c([H])c([H])c([H])c([H])c34)c([H])c2C(=O)N(C([H])([H])[C@@]1([H])C([H])([H])[H])[C@]([H])(C([H])([H])[H])C([H])([H])O[H]	0 (Inactive)	0	0	0
695	PUBCHEM_CID_44483417	[H]OC([H])([H])[C@]([H])(N1C(=O)c2c([H])c(N([H])C(=O)C([H])([H])n3nnnc3[H])c([H])c([H])c2O[C@@]([H])(C([H])([H])N(C(=O)N([H])c2c([H])c([H])c(OC([H])([H])[H])c([H])c2[H])C([H])([H])[H])[C@]([H])(C([H])([H])[H])C1([H])[H])C([H])([H])[H]	0 (Inactive)	0	0	0
696	PUBCHEM_CID_44483418	[H]OC([H])([H])[C@]([H])(N1C(=O)c2c([H])c(N([H])C(=O)C([H])([H])c3c([H])c([H])c([H])c([H])c3[H])c([H])c([H])c2O[C@@]([H])(C([H])([H])N(C([H])([H])[H])C([H])([H])c2c([H])c([H])c3OC([H])([H])Oc3c2[H])[C@]([H])(C([H])([H])[H])C1([H])[H])C([H])([H])[H]	0 (Inactive)	0	0	0
697	PUBCHEM_CID_44483419	[H]OC([H])([H])[C@]([H])(N1C(=O)c2c([H])c(N([H])C(=O)C([H])([H])c3c([H])n(c4c([H])c([H])c([H])c([H])c34)C([H])([H])[H])c([H])c([H])c2O[C@@]([H])(C([H])([H])N(C(=O)N([H])c2c(noc2C([H])([H])[H])C([H])([H])[H])C([H])([H])[H])[C@]([H])(C([H])([H])[H])C1([H])[H])C([H])([H])[H]	0 (Inactive)	0	0	0
698	PUBCHEM_CID_44483420	[H]OC([H])([H])[C@]([H])(N1C(=O)c2c([H])c(N([H])S(=O)(=O)c3c([H])c([H])c(OC([H])([H])[H])c([H])c3[H])c([H])c([H])c2O[C@@]([H])(C([H])([H])N(C([H])([H])[H])C([H])([H])[H])[C@]([H])(C([H])([H])[H])C1([H])[H])C([H])([H])[H]	0 (Inactive)	0	0	0
700	PUBCHEM_CID_44483422	[H]OC([H])([H])[C@]([H])(N1C(=O)c2c([H])c(N([H])C(=O)N([H])c3c([H])c([H])c(c([H])c3[H])C(F)(F)F)c([H])c([H])c2O[C@@]([H])(C([H])([H])N(C(=O)N([H])c2c([H])c([H])c([H])c([H])c2[H])C([H])([H])[H])[C@]([H])(C([H])([H])[H])C1([H])[H])C([H])([H])[H]	0 (Inactive)	0	0	0
701	PUBCHEM_CID_44483423	[H]OC([H])([H])[C@]([H])(N1C(=O)c2c([H])c(N([H])C(=O)C([H])([H])c3c([H])c([H])c([H])c([H])c3[H])c([H])c([H])c2O[C@@]([H])(C([H])([H])N(C([H])([H])[H])S(=O)(=O)c2c([H])c([H])c([H])c([H])c2[H])[C@]([H])(C([H])([H])[H])C1([H])[H])C([H])([H])[H]	0 (Inactive)	0	0	0
702	PUBCHEM_CID_44483424	[H]OC([H])([H])[C@]([H])(N1C(=O)c2c([H])c(N([H])S(=O)(=O)c3c([H])c([H])c(Cl)c([H])c3[H])c([H])c([H])c2O[C@@]([H])(C([H])([H])N(C([H])([H])[H])S(=O)(=O)c2c([H])c([H])c(c([H])c2[H])C([H])([H])[H])[C@]([H])(C([H])([H])[H])C1([H])[H])C([H])([H])[H]	0 (Inactive)	0	0	0
703	PUBCHEM_CID_44483425	[H]OC([H])([H])[C@]([H])(N1C(=O)c2c([H])c(N([H])C(=O)N([H])c3c([H])c([H])c4OC([H])([H])Oc4c3[H])c([H])c([H])c2O[C@@]([H])(C([H])([H])N(C(=O)N([H])C2([H])C([H])([H])C([H])([H])C([H])([H])C([H])([H])C2([H])[H])C([H])([H])[H])[C@]([H])(C([H])([H])[H])C1([H])[H])C([H])([H])[H]	0 (Inactive)	0	0	0
704	PUBCHEM_CID_44483426	[H]OC([H])([H])[C@]([H])(N1C(=O)c2c([H])c(N([H])C(=O)N([H])c3c([H])c([H])c(c([H])c3[H])C(F)(F)F)c([H])c([H])c2O[C@@]([H])(C([H])([H])N(C([H])([H])[H])C([H])([H])[H])[C@]([H])(C([H])([H])[H])C1([H])[H])C([H])([H])[H]	0 (Inactive)	0	0	0
705	PUBCHEM_CID_44483427	[H]OC([H])([H])[C@]([H])(N1C(=O)c2c([H])c(N([H])C(=O)N([H])C([H])(C([H])([H])[H])C([H])([H])[H])c([H])c([H])c2O[C@@]([H])(C([H])([H])N(C([H])([H])[H])S(=O)(=O)c2sc([H])c([H])c2[H])[C@]([H])(C([H])([H])[H])C1([H])[H])C([H])([H])[H]	0 (Inactive)	0	0	0
706	PUBCHEM_CID_44483428	[H]OC([H])([H])[C@]([H])(N1C(=O)c2c([H])c(N([H])S(=O)(=O)c3c([H])c([H])c([H])c([H])c3[H])c([H])c([H])c2O[C@@]([H])(C([H])([H])N(C([H])([H])[H])S(=O)(=O)c2sc([H])c([H])c2[H])[C@]([H])(C([H])([H])[H])C1([H])[H])C([H])([H])[H]	0 (Inactive)	0	0	0
707	PUBCHEM_CID_44483429	[H]OC([H])([H])[C@]([H])(N1C(=O)c2c([H])c(N([H])C(=O)C([H])([H])n3nnnc3[H])c([H])c([H])c2O[C@@]([H])(C([H])([H])N(C([H])([H])[H])S(=O)(=O)c2c([H])c([H])c([H])c([H])c2[H])[C@]([H])(C([H])([H])[H])C1([H])[H])C([H])([H])[H]	0 (Inactive)	0	0	0
708	PUBCHEM_CID_44483430	[H]OC([H])([H])[C@]([H])(N1C(=O)c2c([H])c(N([H])C(=O)C3([H])C([H])([H])C([H])([H])C([H])([H])C([H])([H])C3([H])[H])c([H])c([H])c2O[C@@]([H])(C([H])([H])N(C([H])([H])[H])S(=O)(=O)c2sc([H])c([H])c2[H])[C@]([H])(C([H])([H])[H])C1([H])[H])C([H])([H])[H]	0 (Inactive)	0	0	0
709	PUBCHEM_CID_44483431	[H]OC([H])([H])[C@]([H])(N1C(=O)c2c([H])c(N([H])C(=O)c3c([H])c([H])nc([H])c3[H])c([H])c([H])c2O[C@@]([H])(C([H])([H])N(C([H])([H])[H])C([H])([H])c2c([H])c([H])c3OC([H])([H])Oc3c2[H])[C@]([H])(C([H])([H])[H])C1([H])[H])C([H])([H])[H]	0 (Inactive)	0	0	0
710	PUBCHEM_CID_44202939	[H]OC([H])([H])[C@]([H])(N1C(=O)c2c([H])c(N([H])C(=O)N([H])c3c([H])c([H])c(c([H])c3[H])C(F)(F)F)c([H])c([H])c2O[C@@]([H])(C([H])([H])N(C([H])([H])[H])S(=O)(=O)c2sc([H])c([H])c2[H])[C@]([H])(C([H])([H])[H])C1([H])[H])C([H])([H])[H]	0 (Inactive)	0	0	0
711	PUBCHEM_CID_44483432	[H]OC([H])([H])[C@]([H])(N1C(=O)c2c([H])c(N([H])S(=O)(=O)c3c([H])c([H])c(Cl)c([H])c3[H])c([H])c([H])c2O[C@@]([H])(C([H])([H])N(C(=O)N([H])c2c([H])c([H])c3OC([H])([H])Oc3c2[H])C([H])([H])[H])[C@]([H])(C([H])([H])[H])C1([H])[H])C([H])([H])[H]	0 (Inactive)	0	0	0
712	PUBCHEM_CID_44483433	[H]OC([H])([H])[C@]([H])(N1C(=O)c2c([H])c(N([H])C(=O)N([H])c3c([H])c([H])c(OC([H])([H])[H])c([H])c3[H])c([H])c([H])c2O[C@@]([H])(C([H])([H])N(C([H])([H])[H])S(=O)(=O)c2sc([H])c([H])c2[H])[C@]([H])(C([H])([H])[H])C1([H])[H])C([H])([H])[H]	0 (Inactive)	0	0	0
713	PUBCHEM_CID_44483434	[H]OC([H])([H])[C@@]([H])(N1C(=O)c2c([H])c(N([H])C(=O)C3([H])C([H])([H])C([H])([H])C([H])([H])C([H])([H])C3([H])[H])c([H])c([H])c2O[C@]([H])(C([H])([H])N(C(=O)N([H])C2([H])C([H])([H])C([H])([H])C([H])([H])C([H])([H])C2([H])[H])C([H])([H])[H])[C@@]([H])(C([H])([H])[H])C1([H])[H])C([H])([H])[H]	0 (Inactive)	0	0	0
714	PUBCHEM_CID_44483435	[H]OC([H])([H])[C@@]([H])(N1C(=O)c2c([H])c(N([H])C(=O)N([H])c3c(noc3C([H])([H])[H])C([H])([H])[H])c([H])c([H])c2O[C@]([H])(C([H])([H])N(C([H])([H])[H])C([H])([H])c2c([H])c([H])nc([H])c2[H])[C@@]([H])(C([H])([H])[H])C1([H])[H])C([H])([H])[H]	0 (Inactive)	0	0	0
716	PUBCHEM_CID_44483437	[H]OC([H])([H])[C@]([H])(N1C(=O)c2c([H])c(N([H])C(=O)N([H])C3([H])C([H])([H])C([H])([H])C([H])([H])C([H])([H])C3([H])[H])c([H])c([H])c2O[C@@]([H])(C([H])([H])N(C([H])([H])[H])S(=O)(=O)c2sc([H])c([H])c2[H])[C@]([H])(C([H])([H])[H])C1([H])[H])C([H])([H])[H]	0 (Inactive)	0	0	0
717	PUBCHEM_CID_44483438	[H]OC([H])([H])[C@@]([H])(N1C(=O)c2c([H])c(N([H])C(=O)C3([H])C([H])([H])C([H])([H])C([H])([H])C([H])([H])C3([H])[H])c([H])c([H])c2O[C@]([H])(C([H])([H])N(C([H])([H])[H])C([H])([H])c2c([H])c([H])c([H])c([H])c2[H])[C@@]([H])(C([H])([H])[H])C1([H])[H])C([H])([H])[H]	0 (Inactive)	0	0	0
718	PUBCHEM_CID_44483439	[H]OC([H])([H])[C@@]([H])(N1C(=O)c2c([H])c(N([H])S(=O)(=O)c3c([H])c([H])c([H])c([H])c3[H])c([H])c([H])c2O[C@]([H])(C([H])([H])N(C(=O)N([H])c2c([H])c([H])c(F)c([H])c2[H])C([H])([H])[H])[C@@]([H])(C([H])([H])[H])C1([H])[H])C([H])([H])[H]	0 (Inactive)	0	0	0
719	PUBCHEM_CID_44483440	[H]OC([H])([H])[C@@]([H])(N1C(=O)c2c([H])c(N([H])C(=O)C([H])([H])C([H])([H])C(F)(F)F)c([H])c([H])c2O[C@]([H])(C([H])([H])N(C([H])([H])[H])C([H])([H])C2([H])C([H])([H])C([H])([H])C([H])([H])C([H])([H])C2([H])[H])[C@@]([H])(C([H])([H])[H])C1([H])[H])C([H])([H])[H]	0 (Inactive)	0	0	0
720	PUBCHEM_CID_44483441	[H]OC([H])([H])[C@]([H])(N1C(=O)c2c([H])c(N([H])C(=O)C3([H])C([H])([H])C3([H])[H])c([H])c([H])c2O[C@@]([H])(C([H])([H])N(C([H])([H])[H])S(=O)(=O)c2c([H])c([H])c(F)c([H])c2[H])[C@]([H])(C([H])([H])[H])C1([H])[H])C([H])([H])[H]	0 (Inactive)	0	0	0
721	PUBCHEM_CID_44483442	[H]OC([H])([H])[C@]([H])(N1C(=O)c2c([H])c(N([H])S(=O)(=O)c3sc([H])c([H])c3[H])c([H])c([H])c2O[C@@]([H])(C([H])([H])N([H])C([H])([H])[H])[C@]([H])(C([H])([H])[H])C1([H])[H])C([H])([H])[H]	0 (Inactive)	0	0	0
722	PUBCHEM_CID_44483443	[H]OC([H])([H])[C@]([H])(N1C(=O)c2c([H])c(N([H])S(=O)(=O)c3nc([H])n(c3[H])C([H])([H])[H])c([H])c([H])c2O[C@@]([H])(C([H])([H])N(C([H])([H])[H])S(=O)(=O)c2c([H])c([H])c(c([H])c2[H])C([H])([H])[H])[C@]([H])(C([H])([H])[H])C1([H])[H])C([H])([H])[H]	0 (Inactive)	0	0	0
723	PUBCHEM_CID_44483444	[H]OC([H])([H])[C@@]([H])(N1C(=O)c2c([H])c(N([H])C(=O)N([H])c3c([H])c([H])c(F)c([H])c3[H])c([H])c([H])c2O[C@]([H])(C([H])([H])N(C([H])([H])[H])S(=O)(=O)c2c([H])c([H])c(F)c([H])c2[H])[C@@]([H])(C([H])([H])[H])C1([H])[H])C([H])([H])[H]	0 (Inactive)	0	0	0
724	PUBCHEM_CID_44483445	[H]OC([H])([H])[C@@]([H])(N1C(=O)c2c([H])c(N([H])C(=O)N([H])c3c([H])c([H])c(OC([H])([H])[H])c([H])c3[H])c([H])c([H])c2O[C@]([H])(C([H])([H])N(C([H])([H])[H])S(=O)(=O)c2c([H])c([H])c(Cl)c([H])c2[H])[C@@]([H])(C([H])([H])[H])C1([H])[H])C([H])([H])[H]	0 (Inactive)	0	0	0
725	PUBCHEM_CID_44483446	[H]OC(=O)c1c([H])c([H])c(c([H])c1[H])C([H])([H])N(C([H])([H])[H])C([H])([H])[C@]1([H])Oc2c([H])c([H])c(N([H])C(=O)N([H])c3c([H])c([H])c(F)c([H])c3[H])c([H])c2C(=O)N(C([H])([H])[C@@]1([H])C([H])([H])[H])[C@]([H])(C([H])([H])[H])C([H])([H])O[H]	0 (Inactive)	0	0	0
726	PUBCHEM_CID_44483447	[H]OC([H])([H])[C@]([H])(N1C(=O)c2c([H])c(N([H])C(=O)C([H])([H])c3c([H])c([H])c([H])c([H])c3[H])c([H])c([H])c2O[C@@]([H])(C([H])([H])N(C([H])([H])[H])S(=O)(=O)c2sc([H])c([H])c2[H])[C@]([H])(C([H])([H])[H])C1([H])[H])C([H])([H])[H]	0 (Inactive)	0	0	0
727	PUBCHEM_CID_44483448	[H]OC([H])([H])[C@]([H])(N1C(=O)c2c([H])c(N([H])C(=O)N([H])C([H])(C([H])([H])[H])C([H])([H])[H])c([H])c([H])c2O[C@@]([H])(C([H])([H])N([H])C([H])([H])[H])[C@]([H])(C([H])([H])[H])C1([H])[H])C([H])([H])[H]	0 (Inactive)	0	0	0
728	PUBCHEM_CID_44483449	[H]OC([H])([H])[C@@]([H])(N1C(=O)c2c([H])c(N([H])C(=O)C([H])([H])C([H])([H])C(F)(F)F)c([H])c([H])c2O[C@]([H])(C([H])([H])N(C([H])([H])[H])C([H])([H])c2c([H])c([H])c(Cl)c(Cl)c2[H])[C@@]([H])(C([H])([H])[H])C1([H])[H])C([H])([H])[H]	0 (Inactive)	0	0	0
729	PUBCHEM_CID_44483450	[H]OC([H])([H])[C@@]([H])(N1C(=O)c2c([H])c(N([H])C(=O)c3c([H])c([H])nc([H])c3[H])c([H])c([H])c2O[C@]([H])(C([H])([H])N(C(=O)N([H])c2c(noc2C([H])([H])[H])C([H])([H])[H])C([H])([H])[H])[C@@]([H])(C([H])([H])[H])C1([H])[H])C([H])([H])[H]	0 (Inactive)	0	0	0
730	PUBCHEM_CID_44483451	[H]OC([H])([H])[C@@]([H])(N1C(=O)c2c([H])c(N([H])C(=O)C([H])([H])C([H])([H])C([H])([H])N(C([H])([H])[H])C([H])([H])[H])c([H])c([H])c2O[C@]([H])(C([H])([H])N(C([H])([H])[H])S(=O)(=O)c2c([H])c([H])c(Cl)c([H])c2[H])[C@@]([H])(C([H])([H])[H])C1([H])[H])C([H])([H])[H]	0 (Inactive)	0	0	0
731	PUBCHEM_CID_44483452	[H]OC([H])([H])[C@@]([H])(N1C(=O)c2c([H])c(N([H])C(=O)C3([H])C([H])([H])C3([H])[H])c([H])c([H])c2O[C@]([H])(C([H])([H])N(C([H])([H])[H])C([H])([H])c2c([H])c([H])c(c([H])c2[H])C(F)(F)F)[C@@]([H])(C([H])([H])[H])C1([H])[H])C([H])([H])[H]	0 (Inactive)	0	0	0
733	PUBCHEM_CID_44483454	[H]OC([H])([H])[C@@]([H])(N1C(=O)c2c([H])c(N([H])C(=O)N([H])C([H])(C([H])([H])[H])C([H])([H])[H])c([H])c([H])c2O[C@]([H])(C([H])([H])N(C([H])([H])[H])C([H])([H])c2c([H])c([H])c(Cl)c(Cl)c2[H])[C@@]([H])(C([H])([H])[H])C1([H])[H])C([H])([H])[H]	0 (Inactive)	0	0	0
734	PUBCHEM_CID_44483455	[H]OC([H])([H])[C@@]([H])(N1C(=O)c2c([H])c(N([H])S(=O)(=O)c3c([H])c([H])c(OC([H])([H])[H])c([H])c3[H])c([H])c([H])c2O[C@]([H])(C([H])([H])N(C(=O)N([H])C2([H])C([H])([H])C([H])([H])C([H])([H])C([H])([H])C2([H])[H])C([H])([H])[H])[C@@]([H])(C([H])([H])[H])C1([H])[H])C([H])([H])[H]	0 (Inactive)	0	0	0
735	PUBCHEM_CID_44483456	[H]OC([H])([H])[C@@]([H])(N1C(=O)c2c([H])c(N([H])C(=O)N([H])C3([H])C([H])([H])C([H])([H])C([H])([H])C([H])([H])C3([H])[H])c([H])c([H])c2O[C@]([H])(C([H])([H])N(C([H])([H])[H])S(=O)(=O)c2c([H])c([H])c(OC([H])([H])[H])c([H])c2[H])[C@@]([H])(C([H])([H])[H])C1([H])[H])C([H])([H])[H]	0 (Inactive)	0	0	0
736	PUBCHEM_CID_44483457	[H]OC([H])([H])[C@@]([H])(N1C(=O)c2c([H])c(N([H])C(=O)C([H])([H])n3nnnc3[H])c([H])c([H])c2O[C@]([H])(C([H])([H])N(C([H])([H])[H])C([H])([H])c2c([H])c([H])c([H])c([H])c2[H])[C@@]([H])(C([H])([H])[H])C1([H])[H])C([H])([H])[H]	0 (Inactive)	0	0	0
737	PUBCHEM_CID_44483458	[H]OC([H])([H])[C@@]([H])(N1C(=O)c2c([H])c(N([H])C(=O)C3([H])C([H])([H])C([H])([H])C([H])([H])C([H])([H])C3([H])[H])c([H])c([H])c2O[C@]([H])(C([H])([H])N(C([H])([H])[H])C([H])([H])C2([H])C([H])([H])C([H])([H])C([H])([H])C([H])([H])C2([H])[H])[C@@]([H])(C([H])([H])[H])C1([H])[H])C([H])([H])[H]	0 (Inactive)	0	0	0
738	PUBCHEM_CID_44483459	[H]OC([H])([H])[C@@]([H])(N1C(=O)c2c([H])c(N([H])C(=O)N([H])c3c([H])c([H])c(F)c([H])c3[H])c([H])c([H])c2O[C@]([H])(C([H])([H])N(C([H])([H])[H])S(=O)(=O)c2c([H])c([H])c(c([H])c2[H])C([H])([H])[H])[C@@]([H])(C([H])([H])[H])C1([H])[H])C([H])([H])[H]	0 (Inactive)	0	0	0
739	PUBCHEM_CID_44483460	[H]OC([H])([H])[C@@]([H])(N1C(=O)c2c([H])c(N([H])C(=O)N([H])c3c([H])c([H])c([H])c4c([H])c([H])c([H])c([H])c34)c([H])c([H])c2O[C@]([H])(C([H])([H])N(C([H])([H])[H])S(=O)(=O)C([H])([H])[H])[C@@]([H])(C([H])([H])[H])C1([H])[H])C([H])([H])[H]	0 (Inactive)	0	0	0
740	PUBCHEM_CID_44483461	[H]OC([H])([H])[C@@]([H])(N1C(=O)c2c([H])c(N([H])C(=O)N([H])c3c([H])c([H])c(F)c([H])c3[H])c([H])c([H])c2O[C@]([H])(C([H])([H])N(C([H])([H])[H])S(=O)(=O)c2c([H])c([H])c(Cl)c([H])c2[H])[C@@]([H])(C([H])([H])[H])C1([H])[H])C([H])([H])[H]	0 (Inactive)	0	0	0
741	PUBCHEM_CID_44483462	[H]OC([H])([H])[C@@]([H])(N1C(=O)c2c([H])c(N([H])S(=O)(=O)c3c([H])c([H])c(OC([H])([H])[H])c([H])c3[H])c([H])c([H])c2O[C@]([H])(C([H])([H])N(C([H])([H])[H])C([H])([H])c2c([H])c([H])c3OC([H])([H])Oc3c2[H])[C@@]([H])(C([H])([H])[H])C1([H])[H])C([H])([H])[H]	0 (Inactive)	0	0	0
742	PUBCHEM_CID_44483463	[H]OC([H])([H])[C@@]([H])(N1C(=O)c2c([H])c(N([H])C(=O)N([H])c3c(noc3C([H])([H])[H])C([H])([H])[H])c([H])c([H])c2O[C@]([H])(C([H])([H])N(C([H])([H])[H])C([H])([H])c2c([H])c([H])c(c([H])c2[H])C(F)(F)F)[C@@]([H])(C([H])([H])[H])C1([H])[H])C([H])([H])[H]	0 (Inactive)	0	0	0
743	PUBCHEM_CID_44483464	[H]OC([H])([H])[C@@]([H])(N1C(=O)c2c([H])c(N([H])C(=O)N([H])c3c([H])c([H])c4OC([H])([H])Oc4c3[H])c([H])c([H])c2O[C@]([H])(C([H])([H])N(C([H])([H])[H])C([H])([H])c2c([H])c([H])c(Cl)c(Cl)c2[H])[C@@]([H])(C([H])([H])[H])C1([H])[H])C([H])([H])[H]	0 (Inactive)	0	0	0
744	PUBCHEM_CID_44483465	[H]OC([H])([H])[C@@]([H])(N1C(=O)c2c([H])c(N([H])C(=O)N([H])c3c([H])c([H])c(OC([H])([H])[H])c([H])c3[H])c([H])c([H])c2O[C@]([H])(C([H])([H])N(C(=O)N([H])C2([H])C([H])([H])C([H])([H])C([H])([H])C([H])([H])C2([H])[H])C([H])([H])[H])[C@@]([H])(C([H])([H])[H])C1([H])[H])C([H])([H])[H]	0 (Inactive)	0	0	0
745	PUBCHEM_CID_44483466	[H]OC([H])([H])[C@@]([H])(N1C(=O)c2c([H])c(N([H])C(=O)C3([H])C([H])([H])C3([H])[H])c([H])c([H])c2O[C@]([H])(C([H])([H])N(C(=O)N([H])c2c([H])c([H])c3OC([H])([H])Oc3c2[H])C([H])([H])[H])[C@@]([H])(C([H])([H])[H])C1([H])[H])C([H])([H])[H]	0 (Inactive)	0	0	0
746	PUBCHEM_CID_44483467	[H]OC([H])([H])[C@@]([H])(N1C(=O)c2c([H])c(N([H])C(=O)N([H])c3c(noc3C([H])([H])[H])C([H])([H])[H])c([H])c([H])c2O[C@]([H])(C([H])([H])N(C([H])([H])[H])C([H])([H])c2c([H])c([H])c([H])c([H])c2[H])[C@@]([H])(C([H])([H])[H])C1([H])[H])C([H])([H])[H]	0 (Inactive)	0	0	0
747	PUBCHEM_CID_44483468	[H]OC([H])([H])[C@@]([H])(N1C(=O)c2c([H])c(N([H])S(=O)(=O)c3c([H])c([H])c(OC([H])([H])[H])c([H])c3[H])c([H])c([H])c2O[C@]([H])(C([H])([H])N(C([H])([H])[H])C([H])([H])c2c([H])c([H])nc([H])c2[H])[C@@]([H])(C([H])([H])[H])C1([H])[H])C([H])([H])[H]	0 (Inactive)	0	0	0
748	PUBCHEM_CID_44483469	[H]OC([H])([H])[C@@]([H])(N1C(=O)c2c([H])c(N([H])C(=O)N([H])c3c([H])c([H])c(OC([H])([H])[H])c([H])c3[H])c([H])c([H])c2O[C@]([H])(C([H])([H])N(C([H])([H])[H])C([H])([H])C2([H])C([H])([H])C([H])([H])C([H])([H])C([H])([H])C2([H])[H])[C@@]([H])(C([H])([H])[H])C1([H])[H])C([H])([H])[H]	0 (Inactive)	0	0	0
749	PUBCHEM_CID_44483470	[H]OC([H])([H])[C@@]([H])(N1C(=O)c2c([H])c(N([H])S(=O)(=O)c3sc([H])c([H])c3[H])c([H])c([H])c2O[C@]([H])(C([H])([H])N(C([H])([H])[H])C([H])([H])c2c([H])c([H])nc([H])c2[H])[C@@]([H])(C([H])([H])[H])C1([H])[H])C([H])([H])[H]	0 (Inactive)	0	0	0
750	PUBCHEM_CID_44483471	[H]OC([H])([H])[C@@]([H])(N1C(=O)c2c([H])c(N([H])C(=O)N([H])c3c([H])c([H])c([H])c([H])c3[H])c([H])c([H])c2O[C@]([H])(C([H])([H])N(C([H])([H])[H])C([H])([H])c2c([H])c([H])c3OC([H])([H])Oc3c2[H])[C@@]([H])(C([H])([H])[H])C1([H])[H])C([H])([H])[H]	0 (Inactive)	0	0	0
751	PUBCHEM_CID_44483472	[H]OC([H])([H])[C@@]([H])(N1C(=O)c2c([H])c(N([H])S(=O)(=O)c3c([H])c([H])c(F)c([H])c3[H])c([H])c([H])c2O[C@]([H])(C([H])([H])N(C([H])([H])[H])C([H])([H])c2c([H])c([H])c([H])c([H])c2[H])[C@@]([H])(C([H])([H])[H])C1([H])[H])C([H])([H])[H]	0 (Inactive)	0	0	0
752	PUBCHEM_CID_44483473	[H]OC([H])([H])[C@@]([H])(N1C(=O)c2c([H])c(N([H])C(=O)N([H])c3c([H])c([H])c4OC([H])([H])Oc4c3[H])c([H])c([H])c2O[C@]([H])(C([H])([H])N(C([H])([H])[H])S(=O)(=O)c2nc([H])n(c2[H])C([H])([H])[H])[C@@]([H])(C([H])([H])[H])C1([H])[H])C([H])([H])[H]	0 (Inactive)	0	0	0
753	PUBCHEM_CID_44483474	[H]OC([H])([H])[C@@]([H])(N1C(=O)c2c([H])c(N([H])S(=O)(=O)c3c([H])c([H])c(F)c([H])c3[H])c([H])c([H])c2O[C@]([H])(C([H])([H])N(C(=O)N([H])C2([H])C([H])([H])C([H])([H])C([H])([H])C([H])([H])C2([H])[H])C([H])([H])[H])[C@@]([H])(C([H])([H])[H])C1([H])[H])C([H])([H])[H]	0 (Inactive)	0	0	0
754	PUBCHEM_CID_44483475	[H]OC([H])([H])[C@@]([H])(N1C(=O)c2c([H])c(N([H])C(=O)N([H])c3c([H])c([H])c([H])c([H])c3[H])c([H])c([H])c2O[C@]([H])(C([H])([H])N(C(=O)N([H])C2([H])C([H])([H])C([H])([H])C([H])([H])C([H])([H])C2([H])[H])C([H])([H])[H])[C@@]([H])(C([H])([H])[H])C1([H])[H])C([H])([H])[H]	0 (Inactive)	0	0	0
755	PUBCHEM_CID_44483476	[H]OC([H])([H])[C@@]([H])(N1C(=O)c2c([H])c(N([H])C(=O)c3c([H])c([H])nc([H])c3[H])c([H])c([H])c2O[C@]([H])(C([H])([H])N(C(=O)N([H])c2c([H])c([H])c(OC([H])([H])[H])c([H])c2[H])C([H])([H])[H])[C@@]([H])(C([H])([H])[H])C1([H])[H])C([H])([H])[H]	0 (Inactive)	0	0	0
756	PUBCHEM_CID_44483477	[H]OC([H])([H])[C@@]([H])(N1C(=O)c2c([H])c(N([H])S(=O)(=O)c3c([H])c([H])c(Cl)c([H])c3[H])c([H])c([H])c2O[C@]([H])(C([H])([H])N(C(=O)N([H])c2c([H])c([H])c([H])c3c([H])c([H])c([H])c([H])c23)C([H])([H])[H])[C@@]([H])(C([H])([H])[H])C1([H])[H])C([H])([H])[H]	0 (Inactive)	0	0	0
757	PUBCHEM_CID_44483478	[H]OC([H])([H])[C@@]([H])(N1C(=O)c2c([H])c(N([H])C(=O)C([H])([H])c3c([H])n(c4c([H])c([H])c([H])c([H])c34)C([H])([H])[H])c([H])c([H])c2O[C@]([H])(C([H])([H])N(C([H])([H])[H])C([H])([H])c2c([H])c([H])c([H])c([H])c2[H])[C@@]([H])(C([H])([H])[H])C1([H])[H])C([H])([H])[H]	0 (Inactive)	0	0	0
758	PUBCHEM_CID_44483479	[H]OC([H])([H])[C@@]([H])(N1C(=O)c2c([H])c(N([H])C(=O)C([H])([H])c3c([H])c([H])c([H])c([H])c3[H])c([H])c([H])c2O[C@]([H])(C([H])([H])N(C([H])([H])[H])C([H])([H])c2c([H])c([H])nc([H])c2[H])[C@@]([H])(C([H])([H])[H])C1([H])[H])C([H])([H])[H]	0 (Inactive)	0	0	0
759	PUBCHEM_CID_44483480	[H]OC([H])([H])[C@@]([H])(N1C(=O)c2c([H])c(N([H])C(=O)C3([H])C([H])([H])C3([H])[H])c([H])c([H])c2O[C@]([H])(C([H])([H])N(C([H])([H])[H])S(=O)(=O)c2c([H])c([H])c(OC([H])([H])[H])c([H])c2[H])[C@@]([H])(C([H])([H])[H])C1([H])[H])C([H])([H])[H]	0 (Inactive)	0	0	0
760	PUBCHEM_CID_44483481	[H]OC([H])([H])[C@@]([H])(N1C(=O)c2c([H])c(N([H])S(=O)(=O)c3c([H])c([H])c(F)c([H])c3[H])c([H])c([H])c2O[C@]([H])(C([H])([H])N(C(=O)N([H])c2c([H])c([H])c([H])c([H])c2[H])C([H])([H])[H])[C@@]([H])(C([H])([H])[H])C1([H])[H])C([H])([H])[H]	0 (Inactive)	0	0	0
761	PUBCHEM_CID_44483482	[H]OC([H])([H])[C@@]([H])(N1C(=O)c2c([H])c(N([H])C(=O)C([H])([H])C([H])([H])C(F)(F)F)c([H])c([H])c2O[C@]([H])(C([H])([H])N(C([H])([H])[H])S(=O)(=O)c2nc([H])n(c2[H])C([H])([H])[H])[C@@]([H])(C([H])([H])[H])C1([H])[H])C([H])([H])[H]	0 (Inactive)	0	0	0
762	PUBCHEM_CID_44483483	[H]OC([H])([H])[C@@]([H])(N1C(=O)c2c([H])c(N([H])C(=O)C([H])([H])n3nnnc3[H])c([H])c([H])c2O[C@]([H])(C([H])([H])N(C(=O)N([H])c2c([H])c([H])c(OC([H])([H])[H])c([H])c2[H])C([H])([H])[H])[C@@]([H])(C([H])([H])[H])C1([H])[H])C([H])([H])[H]	0 (Inactive)	0	0	0
763	PUBCHEM_CID_44483484	[H]OC([H])([H])[C@@]([H])(N1C(=O)c2c([H])c(N([H])C(=O)C([H])([H])n3nnnc3[H])c([H])c([H])c2O[C@]([H])(C([H])([H])N(C(=O)N([H])C([H])(C([H])([H])[H])C([H])([H])[H])C([H])([H])[H])[C@@]([H])(C([H])([H])[H])C1([H])[H])C([H])([H])[H]	0 (Inactive)	0	0	0
764	PUBCHEM_CID_44483485	[H]OC([H])([H])[C@@]([H])(N1C(=O)c2c([H])c(N([H])C(=O)C([H])([H])c3c([H])n(c4c([H])c([H])c([H])c([H])c34)C([H])([H])[H])c([H])c([H])c2O[C@]([H])(C([H])([H])N(C([H])([H])[H])S(=O)(=O)C([H])([H])[H])[C@@]([H])(C([H])([H])[H])C1([H])[H])C([H])([H])[H]	0 (Inactive)	0	0	0
765	PUBCHEM_CID_44483486	[H]OC([H])([H])[C@@]([H])(N1C(=O)c2c([H])c(N([H])C(=O)N([H])C3([H])C([H])([H])C([H])([H])C([H])([H])C([H])([H])C3([H])[H])c([H])c([H])c2O[C@]([H])(C([H])([H])N(C([H])([H])[H])S(=O)(=O)c2nc([H])n(c2[H])C([H])([H])[H])[C@@]([H])(C([H])([H])[H])C1([H])[H])C([H])([H])[H]	0 (Inactive)	0	0	0
766	PUBCHEM_CID_44483487	[H]OC([H])([H])[C@@]([H])(N1C(=O)c2c([H])c(N([H])C(=O)N([H])C([H])(C([H])([H])[H])C([H])([H])[H])c([H])c([H])c2O[C@]([H])(C([H])([H])N(C(=O)N([H])c2c([H])c([H])c([H])c3c([H])c([H])c([H])c([H])c23)C([H])([H])[H])[C@@]([H])(C([H])([H])[H])C1([H])[H])C([H])([H])[H]	0 (Inactive)	0	0	0
767	PUBCHEM_CID_44483488	[H]OC([H])([H])[C@@]([H])(N1C(=O)c2c([H])c(N([H])S(=O)(=O)c3nc([H])n(c3[H])C([H])([H])[H])c([H])c([H])c2O[C@]([H])(C([H])([H])N(C([H])([H])[H])S(=O)(=O)c2c([H])c([H])c(F)c([H])c2[H])[C@@]([H])(C([H])([H])[H])C1([H])[H])C([H])([H])[H]	0 (Inactive)	0	0	0
768	PUBCHEM_CID_44483489	[H]OC(=O)c1c([H])c([H])c(c([H])c1[H])C([H])([H])N(C([H])([H])[H])C([H])([H])[C@@]1([H])Oc2c([H])c([H])c(N([H])S(=O)(=O)c3c([H])c([H])c(c([H])c3[H])C([H])([H])[H])c([H])c2C(=O)N(C([H])([H])[C@]1([H])C([H])([H])[H])[C@@]([H])(C([H])([H])[H])C([H])([H])O[H]	0 (Inactive)	0	0	0
769	PUBCHEM_CID_44483490	[H]OC([H])([H])[C@@]([H])(N1C(=O)c2c([H])c(N([H])C(=O)N([H])C3([H])C([H])([H])C([H])([H])C([H])([H])C([H])([H])C3([H])[H])c([H])c([H])c2O[C@]([H])(C([H])([H])N(C([H])([H])[H])C([H])([H])c2c([H])c([H])c(c([H])c2[H])-c2c([H])c([H])c([H])c([H])c2[H])[C@@]([H])(C([H])([H])[H])C1([H])[H])C([H])([H])[H]	0 (Inactive)	0	0	0
770	PUBCHEM_CID_44483491	[H]OC([H])([H])[C@@]([H])(N1C(=O)c2c([H])c(N([H])C(=O)N([H])c3c(noc3C([H])([H])[H])C([H])([H])[H])c([H])c([H])c2O[C@]([H])(C([H])([H])N(C([H])([H])[H])C([H])([H])c2c([H])c([H])c(Cl)c(Cl)c2[H])[C@@]([H])(C([H])([H])[H])C1([H])[H])C([H])([H])[H]	0 (Inactive)	0	0	0
771	PUBCHEM_CID_44483492	[H]OC([H])([H])[C@@]([H])(N1C(=O)c2c([H])c(N([H])C(=O)c3c([H])c([H])nc([H])c3[H])c([H])c([H])c2O[C@]([H])(C([H])([H])N(C([H])([H])[H])C([H])([H])c2c([H])c([H])c(c([H])c2[H])C(F)(F)F)[C@@]([H])(C([H])([H])[H])C1([H])[H])C([H])([H])[H]	0 (Inactive)	0	0	0
772	PUBCHEM_CID_44483493	[H]OC([H])([H])[C@@]([H])(N1C(=O)c2c([H])c(N([H])C(=O)N([H])c3c([H])c([H])c(OC([H])([H])[H])c([H])c3[H])c([H])c([H])c2O[C@]([H])(C([H])([H])N(C([H])([H])[H])C([H])([H])c2c([H])c([H])c(c([H])c2[H])-c2c([H])c([H])c([H])c([H])c2[H])[C@@]([H])(C([H])([H])[H])C1([H])[H])C([H])([H])[H]	0 (Inactive)	0	0	0
773	PUBCHEM_CID_44483494	[H]OC([H])([H])[C@@]([H])(N1C(=O)c2c([H])c(N([H])C(=O)C([H])([H])n3nnnc3[H])c([H])c([H])c2O[C@]([H])(C([H])([H])N(C([H])([H])[H])S(=O)(=O)c2c([H])c([H])c(c([H])c2[H])C([H])([H])[H])[C@@]([H])(C([H])([H])[H])C1([H])[H])C([H])([H])[H]	0 (Inactive)	0	0	0
774	PUBCHEM_CID_44483495	[H]OC([H])([H])[C@@]([H])(N1C(=O)c2c([H])c(N([H])C(=O)C([H])([H])C([H])([H])C(F)(F)F)c([H])c([H])c2O[C@]([H])(C([H])([H])N(C([H])([H])[H])C([H])([H])c2c([H])c([H])c3OC([H])([H])Oc3c2[H])[C@@]([H])(C([H])([H])[H])C1([H])[H])C([H])([H])[H]	0 (Inactive)	0	0	0
775	PUBCHEM_CID_44483496	[H]OC([H])([H])[C@@]([H])(N1C(=O)c2c([H])c(N([H])C(=O)C([H])([H])n3nnnc3[H])c([H])c([H])c2O[C@]([H])(C([H])([H])N(C([H])([H])[H])C([H])([H])c2c([H])c([H])c3OC([H])([H])Oc3c2[H])[C@@]([H])(C([H])([H])[H])C1([H])[H])C([H])([H])[H]	0 (Inactive)	0	0	0
776	PUBCHEM_CID_44483497	[H]OC([H])([H])[C@@]([H])(N1C(=O)c2c([H])c(N([H])C(=O)C([H])([H])C([H])([H])N3C([H])([H])C([H])([H])OC([H])([H])C3([H])[H])c([H])c([H])c2O[C@]([H])(C([H])([H])N(C(=O)N([H])C2([H])C([H])([H])C([H])([H])C([H])([H])C([H])([H])C2([H])[H])C([H])([H])[H])[C@@]([H])(C([H])([H])[H])C1([H])[H])C([H])([H])[H]	0 (Inactive)	0	0	0
777	PUBCHEM_CID_44483498	[H]OC([H])([H])[C@@]([H])(N1C(=O)c2c([H])c(N([H])C(=O)C3([H])C([H])([H])C([H])([H])C([H])([H])C([H])([H])C3([H])[H])c([H])c([H])c2O[C@]([H])(C([H])([H])N(C([H])([H])[H])S(=O)(=O)c2c([H])c([H])c(OC([H])([H])[H])c([H])c2[H])[C@@]([H])(C([H])([H])[H])C1([H])[H])C([H])([H])[H]	0 (Inactive)	0	0	0
778	PUBCHEM_CID_44483499	[H]OC([H])([H])[C@@]([H])(N1C(=O)c2c([H])c(N([H])C(=O)N([H])c3c([H])c([H])c([H])c4c([H])c([H])c([H])c([H])c34)c([H])c([H])c2O[C@]([H])(C([H])([H])N(C(=O)N([H])c2c([H])c([H])c([H])c([H])c2[H])C([H])([H])[H])[C@@]([H])(C([H])([H])[H])C1([H])[H])C([H])([H])[H]	0 (Inactive)	0	0	0
779	PUBCHEM_CID_44483500	[H]OC([H])([H])[C@@]([H])(N1C(=O)c2c([H])c(N([H])C(=O)N([H])c3c([H])c([H])c([H])c([H])c3[H])c([H])c([H])c2O[C@]([H])(C([H])([H])N(C([H])([H])[H])C([H])([H])c2c([H])c([H])c(Cl)c(Cl)c2[H])[C@@]([H])(C([H])([H])[H])C1([H])[H])C([H])([H])[H]	0 (Inactive)	0	0	0
780	PUBCHEM_CID_44483501	[H]OC([H])([H])[C@@]([H])(N1C(=O)c2c([H])c(N([H])C(=O)C([H])([H])c3c([H])c([H])c([H])c([H])c3[H])c([H])c([H])c2O[C@]([H])(C([H])([H])N(C([H])([H])[H])C([H])([H])c2c([H])c([H])c(c([H])c2[H])C(F)(F)F)[C@@]([H])(C([H])([H])[H])C1([H])[H])C([H])([H])[H]	0 (Inactive)	0	0	0
781	PUBCHEM_CID_44483502	[H]OC([H])([H])[C@@]([H])(N1C(=O)c2c([H])c(N([H])S(=O)(=O)c3c([H])c([H])c(c([H])c3[H])C([H])([H])[H])c([H])c([H])c2O[C@]([H])(C([H])([H])N(C([H])([H])[H])C([H])([H])c2c([H])c([H])c(c([H])c2[H])C(F)(F)F)[C@@]([H])(C([H])([H])[H])C1([H])[H])C([H])([H])[H]	0 (Inactive)	0	0	0
782	PUBCHEM_CID_44483503	[H]OC([H])([H])[C@@]([H])(N1C(=O)c2c([H])c(N([H])C(=O)N([H])c3c([H])c([H])c(c([H])c3[H])C(F)(F)F)c([H])c([H])c2O[C@]([H])(C([H])([H])N(C([H])([H])[H])S(=O)(=O)c2c([H])c([H])c(OC([H])([H])[H])c([H])c2[H])[C@@]([H])(C([H])([H])[H])C1([H])[H])C([H])([H])[H]	0 (Inactive)	0	0	0
783	PUBCHEM_CID_44483504	[H]OC([H])([H])[C@@]([H])(N1C(=O)c2c([H])c(N([H])C(=O)C([H])([H])C([H])([H])N3C([H])([H])C([H])([H])OC([H])([H])C3([H])[H])c([H])c([H])c2O[C@]([H])(C([H])([H])N(C(=O)N([H])c2c([H])c([H])c3OC([H])([H])Oc3c2[H])C([H])([H])[H])[C@@]([H])(C([H])([H])[H])C1([H])[H])C([H])([H])[H]	0 (Inactive)	0	0	0
784	PUBCHEM_CID_44483505	[H]OC([H])([H])[C@@]([H])(N1C(=O)c2c([H])c(N([H])S(=O)(=O)c3c([H])c([H])c([H])c([H])c3[H])c([H])c([H])c2O[C@]([H])(C([H])([H])N(C(=O)N([H])c2c([H])c([H])c(OC([H])([H])[H])c([H])c2[H])C([H])([H])[H])[C@@]([H])(C([H])([H])[H])C1([H])[H])C([H])([H])[H]	0 (Inactive)	0	0	0
785	PUBCHEM_CID_44483506	[H]OC([H])([H])[C@@]([H])(N1C(=O)c2c([H])c(N([H])S(=O)(=O)c3c([H])c([H])c(OC([H])([H])[H])c([H])c3[H])c([H])c([H])c2O[C@]([H])(C([H])([H])N(C(=O)N([H])c2c([H])c([H])c([H])c([H])c2[H])C([H])([H])[H])[C@@]([H])(C([H])([H])[H])C1([H])[H])C([H])([H])[H]	0 (Inactive)	0	0	0
786	PUBCHEM_CID_44483507	[H]OC([H])([H])[C@@]([H])(N1C(=O)c2c([H])c(N([H])S(=O)(=O)c3c([H])c([H])c(c([H])c3[H])C([H])([H])[H])c([H])c([H])c2O[C@]([H])(C([H])([H])N(C([H])([H])[H])S(=O)(=O)c2nc([H])n(c2[H])C([H])([H])[H])[C@@]([H])(C([H])([H])[H])C1([H])[H])C([H])([H])[H]	0 (Inactive)	0	0	0
787	PUBCHEM_CID_44483508	[H]OC([H])([H])[C@@]([H])(N1C(=O)c2c([H])c(N([H])S(=O)(=O)c3c([H])c([H])c(Cl)c([H])c3[H])c([H])c([H])c2O[C@]([H])(C([H])([H])N(C([H])([H])[H])S(=O)(=O)c2c([H])c([H])c(OC([H])([H])[H])c([H])c2[H])[C@@]([H])(C([H])([H])[H])C1([H])[H])C([H])([H])[H]	0 (Inactive)	0	0	0
788	PUBCHEM_CID_44483509	[H]OC([H])([H])[C@@]([H])(N1C(=O)c2c([H])c(N([H])S(=O)(=O)c3c(noc3C([H])([H])[H])C([H])([H])[H])c([H])c([H])c2O[C@]([H])(C([H])([H])N(C(=O)N([H])c2c([H])c([H])c(F)c([H])c2[H])C([H])([H])[H])[C@@]([H])(C([H])([H])[H])C1([H])[H])C([H])([H])[H]	0 (Inactive)	0	0	0
789	PUBCHEM_CID_44483510	[H]OC([H])([H])[C@@]([H])(N1C(=O)c2c([H])c(N([H])S(=O)(=O)c3c([H])c([H])c(c([H])c3[H])C([H])([H])[H])c([H])c([H])c2O[C@]([H])(C([H])([H])N(C(=O)N([H])c2c([H])c([H])c(OC([H])([H])[H])c([H])c2[H])C([H])([H])[H])[C@@]([H])(C([H])([H])[H])C1([H])[H])C([H])([H])[H]	0 (Inactive)	0	0	0
790	PUBCHEM_CID_44483511	[H]OC([H])([H])[C@@]([H])(N1C(=O)c2c([H])c(N([H])C(=O)N([H])c3c([H])c([H])c(c([H])c3[H])C(F)(F)F)c([H])c([H])c2O[C@]([H])(C([H])([H])N(C([H])([H])[H])C([H])([H])c2c([H])c([H])c3OC([H])([H])Oc3c2[H])[C@@]([H])(C([H])([H])[H])C1([H])[H])C([H])([H])[H]	0 (Inactive)	0	0	0
791	PUBCHEM_CID_44483512	[H]OC([H])([H])[C@@]([H])(N1C(=O)c2c([H])c(N([H])C(=O)N([H])c3c(noc3C([H])([H])[H])C([H])([H])[H])c([H])c([H])c2O[C@]([H])(C([H])([H])N(C([H])([H])[H])C([H])([H])c2c([H])c([H])c(Oc3c([H])c([H])c([H])c([H])c3[H])c([H])c2[H])[C@@]([H])(C([H])([H])[H])C1([H])[H])C([H])([H])[H]	0 (Inactive)	0	0	0
792	PUBCHEM_CID_44483513	[H]OC([H])([H])[C@@]([H])(N1C(=O)c2c([H])c(N([H])C(=O)C([H])([H])c3c([H])n(c4c([H])c([H])c([H])c([H])c34)C([H])([H])[H])c([H])c([H])c2O[C@]([H])(C([H])([H])N(C([H])([H])[H])S(=O)(=O)c2sc([H])c([H])c2[H])[C@@]([H])(C([H])([H])[H])C1([H])[H])C([H])([H])[H]	0 (Inactive)	0	0	0
793	PUBCHEM_CID_44483514	[H]OC([H])([H])[C@@]([H])(N1C(=O)c2c([H])c(N([H])C(=O)C([H])([H])C([H])([H])C(F)(F)F)c([H])c([H])c2O[C@]([H])(C([H])([H])N(C([H])([H])[H])C([H])([H])c2c([H])c([H])c(Oc3c([H])c([H])c([H])c([H])c3[H])c([H])c2[H])[C@@]([H])(C([H])([H])[H])C1([H])[H])C([H])([H])[H]	0 (Inactive)	0	0	0
794	PUBCHEM_CID_44483515	[H]OC([H])([H])[C@]([H])(N1C(=O)c2c([H])c(N([H])C(=O)C([H])([H])C([H])([H])C(F)(F)F)c([H])c([H])c2O[C@@]([H])(C([H])([H])N(C([H])([H])[H])C([H])([H])c2c([H])c([H])c(Cl)c(Cl)c2[H])[C@@]([H])(C([H])([H])[H])C1([H])[H])C([H])([H])[H]	0 (Inactive)	0	0	0
795	PUBCHEM_CID_44483516	[H]OC([H])([H])[C@]([H])(N1C(=O)c2c([H])c(N([H])S(=O)(=O)c3c([H])c([H])c(F)c([H])c3[H])c([H])c([H])c2O[C@@]([H])(C([H])([H])N(C(=O)N([H])c2c([H])c([H])c([H])c([H])c2[H])C([H])([H])[H])[C@@]([H])(C([H])([H])[H])C1([H])[H])C([H])([H])[H]	0 (Inactive)	0	0	0
796	PUBCHEM_CID_44483517	[H]OC([H])([H])[C@]([H])(N1C(=O)c2c([H])c(N([H])S(=O)(=O)c3sc([H])c([H])c3[H])c([H])c([H])c2O[C@@]([H])(C([H])([H])N(C(=O)N([H])c2c([H])c([H])c(c([H])c2[H])C(F)(F)F)C([H])([H])[H])[C@@]([H])(C([H])([H])[H])C1([H])[H])C([H])([H])[H]	0 (Inactive)	0	0	0
797	PUBCHEM_CID_44483518	[H]OC([H])([H])[C@]([H])(N1C(=O)c2c([H])c(N([H])C(=O)C([H])([H])n3nnnc3[H])c([H])c([H])c2O[C@@]([H])(C([H])([H])N(C([H])([H])[H])S(=O)(=O)c2c([H])c([H])c([H])c([H])c2[H])[C@@]([H])(C([H])([H])[H])C1([H])[H])C([H])([H])[H]	0 (Inactive)	0	0	0
798	PUBCHEM_CID_44483519	[H]OC([H])([H])[C@]([H])(N1C(=O)c2c([H])c(N([H])S(=O)(=O)c3c([H])c([H])c(c([H])c3[H])C([H])([H])[H])c([H])c([H])c2O[C@@]([H])(C([H])([H])N(C([H])([H])[H])S(=O)(=O)c2c([H])c([H])c(OC([H])([H])[H])c([H])c2[H])[C@@]([H])(C([H])([H])[H])C1([H])[H])C([H])([H])[H]	0 (Inactive)	0	0	0
800	PUBCHEM_CID_44483521	[H]OC([H])([H])[C@]([H])(N1C(=O)c2c([H])c(N([H])C(=O)C([H])([H])c3c([H])n(c4c([H])c([H])c([H])c([H])c34)C([H])([H])[H])c([H])c([H])c2O[C@@]([H])(C([H])([H])N(C([H])([H])[H])S(=O)(=O)c2c([H])c([H])c(F)c([H])c2[H])[C@@]([H])(C([H])([H])[H])C1([H])[H])C([H])([H])[H]	0 (Inactive)	0	0	0
801	PUBCHEM_CID_44483522	[H]OC([H])([H])[C@]([H])(N1C(=O)c2c([H])c(N([H])C(=O)N([H])c3c([H])c([H])c(c([H])c3[H])C(F)(F)F)c([H])c([H])c2O[C@@]([H])(C([H])([H])N(C([H])([H])[H])C([H])([H])c2c([H])c([H])c(c([H])c2[H])-c2c([H])c([H])c([H])c([H])c2[H])[C@@]([H])(C([H])([H])[H])C1([H])[H])C([H])([H])[H]	0 (Inactive)	0	0	0
802	PUBCHEM_CID_44483523	[H]OC([H])([H])[C@]([H])(N1C(=O)c2c([H])c(N([H])C(=O)N([H])c3c([H])c([H])c(c([H])c3[H])C(F)(F)F)c([H])c([H])c2O[C@@]([H])(C([H])([H])N(C([H])([H])[H])S(=O)(=O)c2c([H])c([H])c([H])c([H])c2[H])[C@@]([H])(C([H])([H])[H])C1([H])[H])C([H])([H])[H]	0 (Inactive)	0	0	0
803	PUBCHEM_CID_44483524	[H]OC([H])([H])[C@]([H])(N1C(=O)c2c([H])c(N([H])S(=O)(=O)C([H])([H])[H])c([H])c([H])c2O[C@@]([H])(C([H])([H])N(C([H])([H])[H])C([H])([H])c2c([H])c([H])c(Cl)c(Cl)c2[H])[C@@]([H])(C([H])([H])[H])C1([H])[H])C([H])([H])[H]	0 (Inactive)	0	0	0
804	PUBCHEM_CID_44483525	[H]OC([H])([H])[C@]([H])(N1C(=O)c2c([H])c(N([H])S(=O)(=O)c3c([H])c([H])c([H])c([H])c3[H])c([H])c([H])c2O[C@@]([H])(C([H])([H])N(C([H])([H])[H])C([H])([H])c2c([H])c([H])c(Cl)c(Cl)c2[H])[C@@]([H])(C([H])([H])[H])C1([H])[H])C([H])([H])[H]	0 (Inactive)	0	0	0
805	PUBCHEM_CID_44483526	[H]OC([H])([H])[C@]([H])(N1C(=O)c2c([H])c(N([H])C(=O)C([H])([H])c3c([H])n(c4c([H])c([H])c([H])c([H])c34)C([H])([H])[H])c([H])c([H])c2O[C@@]([H])(C([H])([H])N(C([H])([H])[H])C([H])([H])c2c([H])c([H])c(c([H])c2[H])-c2c([H])c([H])c([H])c([H])c2[H])[C@@]([H])(C([H])([H])[H])C1([H])[H])C([H])([H])[H]	0 (Inactive)	0	0	0
806	PUBCHEM_CID_44483527	[H]OC([H])([H])[C@]([H])(N1C(=O)c2c([H])c(N([H])S(=O)(=O)c3c([H])c([H])c(Cl)c([H])c3[H])c([H])c([H])c2O[C@@]([H])(C([H])([H])N(C(=O)N([H])c2c([H])c([H])c(F)c([H])c2[H])C([H])([H])[H])[C@@]([H])(C([H])([H])[H])C1([H])[H])C([H])([H])[H]	0 (Inactive)	0	0	0
807	PUBCHEM_CID_44483528	[H]OC([H])([H])[C@]([H])(N1C(=O)c2c([H])c(N([H])S(=O)(=O)c3nc([H])n(c3[H])C([H])([H])[H])c([H])c([H])c2O[C@@]([H])(C([H])([H])N(C(=O)N([H])c2c([H])c([H])c(c([H])c2[H])C(F)(F)F)C([H])([H])[H])[C@@]([H])(C([H])([H])[H])C1([H])[H])C([H])([H])[H]	0 (Inactive)	0	0	0
808	PUBCHEM_CID_44483529	[H]OC([H])([H])[C@]([H])(N1C(=O)c2c([H])c(N([H])C(=O)N([H])c3c([H])c([H])c([H])c4c([H])c([H])c([H])c([H])c34)c([H])c([H])c2O[C@@]([H])(C([H])([H])N(C([H])([H])[H])C([H])([H])c2c([H])c([H])c(c([H])c2[H])C(F)(F)F)[C@@]([H])(C([H])([H])[H])C1([H])[H])C([H])([H])[H]	0 (Inactive)	0	0	0
809	PUBCHEM_CID_44483530	[H]OC([H])([H])[C@]([H])(N1C(=O)c2c([H])c(N([H])C(=O)C([H])([H])n3nnnc3[H])c([H])c([H])c2O[C@@]([H])(C([H])([H])N(C(=O)N([H])C([H])(C([H])([H])[H])C([H])([H])[H])C([H])([H])[H])[C@@]([H])(C([H])([H])[H])C1([H])[H])C([H])([H])[H]	0 (Inactive)	0	0	0
810	PUBCHEM_CID_44483531	[H]OC([H])([H])[C@]([H])(N1C(=O)c2c([H])c(N([H])S(=O)(=O)c3c([H])c([H])c([H])c([H])c3[H])c([H])c([H])c2O[C@@]([H])(C([H])([H])N(C([H])([H])[H])S(=O)(=O)c2c([H])c([H])c(c([H])c2[H])C([H])([H])[H])[C@@]([H])(C([H])([H])[H])C1([H])[H])C([H])([H])[H]	0 (Inactive)	0	0	0
811	PUBCHEM_CID_44483532	[H]OC([H])([H])[C@]([H])(N1C(=O)c2c([H])c(N([H])C(=O)N([H])C([H])(C([H])([H])[H])C([H])([H])[H])c([H])c([H])c2O[C@@]([H])(C([H])([H])N(C([H])([H])[H])C([H])([H])[H])[C@@]([H])(C([H])([H])[H])C1([H])[H])C([H])([H])[H]	0 (Inactive)	0	0	0
812	PUBCHEM_CID_44483533	[H]OC([H])([H])[C@]([H])(N1C(=O)c2c([H])c(N([H])C(=O)N([H])c3c([H])c([H])c([H])c([H])c3[H])c([H])c([H])c2O[C@@]([H])(C([H])([H])N(C([H])([H])[H])S(=O)(=O)c2c([H])c([H])c([H])c([H])c2[H])[C@@]([H])(C([H])([H])[H])C1([H])[H])C([H])([H])[H]	0 (Inactive)	0	0	0
813	PUBCHEM_CID_44483534	[H]OC([H])([H])[C@]([H])(N1C(=O)c2c([H])c(N([H])S(=O)(=O)c3c([H])c([H])c(OC([H])([H])[H])c([H])c3[H])c([H])c([H])c2O[C@@]([H])(C([H])([H])N(C([H])([H])[H])C([H])([H])c2c([H])c([H])nc([H])c2[H])[C@@]([H])(C([H])([H])[H])C1([H])[H])C([H])([H])[H]	0 (Inactive)	0	0	0
814	PUBCHEM_CID_44483535	[H]OC([H])([H])[C@]([H])(N1C(=O)c2c([H])c(N([H])S(=O)(=O)c3c([H])c([H])c(F)c([H])c3[H])c([H])c([H])c2O[C@@]([H])(C([H])([H])N(C(=O)N([H])c2c([H])c([H])c3OC([H])([H])Oc3c2[H])C([H])([H])[H])[C@@]([H])(C([H])([H])[H])C1([H])[H])C([H])([H])[H]	0 (Inactive)	0	0	0
816	PUBCHEM_CID_44483537	[H]OC([H])([H])[C@]([H])(N1C(=O)c2c([H])c(N([H])C(=O)N([H])c3c([H])c([H])c([H])c4c([H])c([H])c([H])c([H])c34)c([H])c([H])c2O[C@@]([H])(C([H])([H])N(C(=O)N([H])C([H])(C([H])([H])[H])C([H])([H])[H])C([H])([H])[H])[C@@]([H])(C([H])([H])[H])C1([H])[H])C([H])([H])[H]	0 (Inactive)	0	0	0
817	PUBCHEM_CID_44483538	[H]OC([H])([H])[C@]([H])(N1C(=O)c2c([H])c(N([H])S(=O)(=O)c3c([H])c([H])c(OC([H])([H])[H])c([H])c3[H])c([H])c([H])c2O[C@@]([H])(C([H])([H])N(C([H])([H])[H])S(=O)(=O)c2c([H])c([H])c(OC([H])([H])[H])c([H])c2[H])[C@@]([H])(C([H])([H])[H])C1([H])[H])C([H])([H])[H]	0 (Inactive)	0	0	0
818	PUBCHEM_CID_44483539	[H]OC([H])([H])[C@]([H])(N1C(=O)c2c([H])c(N([H])S(=O)(=O)c3nc([H])n(c3[H])C([H])([H])[H])c([H])c([H])c2O[C@@]([H])(C([H])([H])N(C([H])([H])[H])S(=O)(=O)c2c([H])c([H])c([H])c([H])c2[H])[C@@]([H])(C([H])([H])[H])C1([H])[H])C([H])([H])[H]	0 (Inactive)	0	0	0
819	PUBCHEM_CID_44483540	[H]OC([H])([H])[C@]([H])(N1C(=O)c2c([H])c(N([H])S(=O)(=O)c3c([H])c([H])c([H])c([H])c3[H])c([H])c([H])c2O[C@@]([H])(C([H])([H])N(C([H])([H])[H])S(=O)(=O)c2sc([H])c([H])c2[H])[C@@]([H])(C([H])([H])[H])C1([H])[H])C([H])([H])[H]	0 (Inactive)	0	0	0
820	PUBCHEM_CID_44483541	[H]OC([H])([H])[C@]([H])(N1C(=O)c2c([H])c(N([H])C(=O)N([H])c3c([H])c([H])c([H])c4c([H])c([H])c([H])c([H])c34)c([H])c([H])c2O[C@@]([H])(C([H])([H])N(C([H])([H])[H])C([H])([H])c2c([H])c([H])nc([H])c2[H])[C@@]([H])(C([H])([H])[H])C1([H])[H])C([H])([H])[H]	0 (Inactive)	0	0	0
821	PUBCHEM_CID_44483542	[H]OC([H])([H])[C@]([H])(N1C(=O)c2c([H])c(N([H])C(=O)C([H])([H])C([H])([H])N3C([H])([H])C([H])([H])OC([H])([H])C3([H])[H])c([H])c([H])c2O[C@@]([H])(C([H])([H])N(C([H])([H])[H])C([H])([H])c2c([H])c([H])nc([H])c2[H])[C@@]([H])(C([H])([H])[H])C1([H])[H])C([H])([H])[H]	0 (Inactive)	0	0	0
822	PUBCHEM_CID_44483543	[H]OC([H])([H])[C@]([H])(N1C(=O)c2c([H])c(N([H])S(=O)(=O)c3c([H])c([H])c(OC([H])([H])[H])c([H])c3[H])c([H])c([H])c2O[C@@]([H])(C([H])([H])N(C([H])([H])[H])S(=O)(=O)c2c([H])c([H])c([H])c([H])c2[H])[C@@]([H])(C([H])([H])[H])C1([H])[H])C([H])([H])[H]	0 (Inactive)	0	0	0
823	PUBCHEM_CID_44483544	[H]OC([H])([H])[C@]([H])(N1C(=O)c2c([H])c(N([H])C(=O)C([H])([H])n3nnnc3[H])c([H])c([H])c2O[C@@]([H])(C([H])([H])N(C([H])([H])[H])S(=O)(=O)c2c([H])c([H])c(c([H])c2[H])C([H])([H])[H])[C@@]([H])(C([H])([H])[H])C1([H])[H])C([H])([H])[H]	0 (Inactive)	0	0	0
824	PUBCHEM_CID_44483545	[H]OC([H])([H])[C@]([H])(N1C(=O)c2c([H])c(N([H])C(=O)N([H])c3c(noc3C([H])([H])[H])C([H])([H])[H])c([H])c([H])c2O[C@@]([H])(C([H])([H])N(C([H])([H])[H])S(=O)(=O)c2c([H])c([H])c([H])c([H])c2[H])[C@@]([H])(C([H])([H])[H])C1([H])[H])C([H])([H])[H]	0 (Inactive)	0	0	0
825	PUBCHEM_CID_44483546	[H]OC([H])([H])[C@]([H])(N1C(=O)c2c([H])c(N([H])C(=O)C([H])([H])C([H])([H])N3C([H])([H])C([H])([H])OC([H])([H])C3([H])[H])c([H])c([H])c2O[C@@]([H])(C([H])([H])N(C([H])([H])[H])S(=O)(=O)c2c([H])c([H])c(F)c([H])c2[H])[C@@]([H])(C([H])([H])[H])C1([H])[H])C([H])([H])[H]	0 (Inactive)	0	0	0
826	PUBCHEM_CID_44483547	[H]OC([H])([H])[C@]([H])(N1C(=O)c2c([H])c(N([H])S(=O)(=O)C([H])([H])[H])c([H])c([H])c2O[C@@]([H])(C([H])([H])N(C([H])([H])[H])S(=O)(=O)c2c([H])c([H])c(OC([H])([H])[H])c([H])c2[H])[C@@]([H])(C([H])([H])[H])C1([H])[H])C([H])([H])[H]	0 (Inactive)	0	0	0
827	PUBCHEM_CID_44483548	[H]OC([H])([H])[C@]([H])(N1C(=O)c2c([H])c(N([H])C(=O)N([H])c3c([H])c([H])c(OC([H])([H])[H])c([H])c3[H])c([H])c([H])c2O[C@@]([H])(C([H])([H])N(C([H])([H])[H])S(=O)(=O)c2c([H])c([H])c(Cl)c([H])c2[H])[C@@]([H])(C([H])([H])[H])C1([H])[H])C([H])([H])[H]	0 (Inactive)	0	0	0
828	PUBCHEM_CID_44483549	[H]OC([H])([H])[C@]([H])(N1C(=O)c2c([H])c(N([H])S(=O)(=O)c3c([H])c([H])c(F)c([H])c3[H])c([H])c([H])c2O[C@@]([H])(C([H])([H])N(C([H])([H])[H])S(=O)(=O)c2nc([H])n(c2[H])C([H])([H])[H])[C@@]([H])(C([H])([H])[H])C1([H])[H])C([H])([H])[H]	0 (Inactive)	0	0	0
829	PUBCHEM_CID_44483550	[H]OC([H])([H])[C@]([H])(N1C(=O)c2c([H])c(N([H])S(=O)(=O)c3c([H])c([H])c(c([H])c3[H])C([H])([H])[H])c([H])c([H])c2O[C@@]([H])(C([H])([H])N(C([H])([H])[H])S(=O)(=O)c2sc([H])c([H])c2[H])[C@@]([H])(C([H])([H])[H])C1([H])[H])C([H])([H])[H]	0 (Inactive)	0	0	0
830	PUBCHEM_CID_44483551	[H]OC([H])([H])[C@]([H])(N1C(=O)c2c([H])c(N([H])C(=O)N([H])C3([H])C([H])([H])C([H])([H])C([H])([H])C([H])([H])C3([H])[H])c([H])c([H])c2O[C@@]([H])(C([H])([H])N(C([H])([H])[H])S(=O)(=O)c2nc([H])n(c2[H])C([H])([H])[H])[C@@]([H])(C([H])([H])[H])C1([H])[H])C([H])([H])[H]	0 (Inactive)	0	0	0
831	PUBCHEM_CID_44483552	[H]OC([H])([H])[C@]([H])(N1C(=O)c2c([H])c(N([H])C(=O)C([H])([H])c3c([H])c([H])c([H])c([H])c3[H])c([H])c([H])c2O[C@@]([H])(C([H])([H])N(C([H])([H])[H])S(=O)(=O)c2c([H])c([H])c(c([H])c2[H])C([H])([H])[H])[C@@]([H])(C([H])([H])[H])C1([H])[H])C([H])([H])[H]	0 (Inactive)	0	0	0
833	PUBCHEM_CID_44483554	[H]OC([H])([H])[C@]([H])(N1C(=O)c2c([H])c(N([H])C(=O)N([H])C([H])(C([H])([H])[H])C([H])([H])[H])c([H])c([H])c2O[C@@]([H])(C([H])([H])N(C([H])([H])[H])S(=O)(=O)c2c([H])c([H])c(c([H])c2[H])C([H])([H])[H])[C@@]([H])(C([H])([H])[H])C1([H])[H])C([H])([H])[H]	0 (Inactive)	0	0	0
834	PUBCHEM_CID_44483555	[H]OC([H])([H])[C@]([H])(N1C(=O)c2c([H])c(N([H])S(=O)(=O)c3c([H])c([H])c(F)c([H])c3[H])c([H])c([H])c2O[C@@]([H])(C([H])([H])N(C([H])([H])[H])S(=O)(=O)C([H])([H])[H])[C@@]([H])(C([H])([H])[H])C1([H])[H])C([H])([H])[H]	0 (Inactive)	0	0	0
835	PUBCHEM_CID_44483556	[H]OC([H])([H])[C@]([H])(N1C(=O)c2c([H])c(N([H])C(=O)C3([H])C([H])([H])C([H])([H])C([H])([H])C([H])([H])C3([H])[H])c([H])c([H])c2O[C@@]([H])(C([H])([H])N(C([H])([H])[H])C([H])([H])c2c([H])c([H])c([H])c([H])c2[H])[C@@]([H])(C([H])([H])[H])C1([H])[H])C([H])([H])[H]	0 (Inactive)	0	0	0
836	PUBCHEM_CID_44483557	[H]OC([H])([H])[C@@]([H])(N1C(=O)c2c([H])c(N([H])C(=O)C([H])([H])n3nnnc3[H])c([H])c([H])c2O[C@]([H])(C([H])([H])N(C([H])([H])[H])S(=O)(=O)c2sc([H])c([H])c2[H])[C@]([H])(C([H])([H])[H])C1([H])[H])C([H])([H])[H]	0 (Inactive)	0	0	0
837	PUBCHEM_CID_44483558	[H]OC([H])([H])[C@@]([H])(N1C(=O)c2c([H])c(N([H])S(=O)(=O)c3c([H])c([H])c(c([H])c3[H])C([H])([H])[H])c([H])c([H])c2O[C@]([H])(C([H])([H])N([H])C([H])([H])[H])[C@]([H])(C([H])([H])[H])C1([H])[H])C([H])([H])[H]	0 (Inactive)	0	0	0
838	PUBCHEM_CID_44483559	[H]OC([H])([H])[C@@]([H])(N1C(=O)c2c([H])c(N([H])S(=O)(=O)c3c([H])c([H])c(c([H])c3[H])C([H])([H])[H])c([H])c([H])c2O[C@]([H])(C([H])([H])N(C([H])([H])[H])C([H])([H])c2c([H])c([H])nc([H])c2[H])[C@]([H])(C([H])([H])[H])C1([H])[H])C([H])([H])[H]	0 (Inactive)	0	0	0
839	PUBCHEM_CID_44483560	[H]OC(=O)c1c([H])c([H])c(c([H])c1[H])C([H])([H])N(C([H])([H])[H])C([H])([H])[C@@]1([H])Oc2c([H])c([H])c(N([H])C(=O)N([H])c3c([H])c([H])c(F)c([H])c3[H])c([H])c2C(=O)N(C([H])([H])[C@@]1([H])C([H])([H])[H])[C@@]([H])(C([H])([H])[H])C([H])([H])O[H]	0 (Inactive)	0	0	0
840	PUBCHEM_CID_44483561	[H]OC([H])([H])[C@@]([H])(N1C(=O)c2c([H])c(N([H])C(=O)N([H])c3c([H])c([H])c([H])c([H])c3[H])c([H])c([H])c2O[C@]([H])(C([H])([H])N(C([H])([H])[H])C([H])([H])C2([H])C([H])([H])C([H])([H])C([H])([H])C([H])([H])C2([H])[H])[C@]([H])(C([H])([H])[H])C1([H])[H])C([H])([H])[H]	0 (Inactive)	0	0	0
841	PUBCHEM_CID_44483562	[H]OC([H])([H])[C@@]([H])(N1C(=O)c2c([H])c(N([H])C(=O)N([H])C([H])(C([H])([H])[H])C([H])([H])[H])c([H])c([H])c2O[C@]([H])(C([H])([H])N(C([H])([H])[H])C([H])([H])[H])[C@]([H])(C([H])([H])[H])C1([H])[H])C([H])([H])[H]	0 (Inactive)	0	0	0
842	PUBCHEM_CID_44483563	[H]OC([H])([H])[C@@]([H])(N1C(=O)c2c([H])c(N([H])C(=O)N([H])c3c(noc3C([H])([H])[H])C([H])([H])[H])c([H])c([H])c2O[C@]([H])(C([H])([H])N(C([H])([H])[H])C([H])([H])[H])[C@]([H])(C([H])([H])[H])C1([H])[H])C([H])([H])[H]	0 (Inactive)	0	0	0
843	PUBCHEM_CID_44483564	[H]OC([H])([H])[C@@]([H])(N1C(=O)c2c([H])c(N([H])S(=O)(=O)c3nc([H])n(c3[H])C([H])([H])[H])c([H])c([H])c2O[C@]([H])(C([H])([H])N(C([H])([H])[H])C([H])([H])c2c([H])c([H])c([H])c([H])c2[H])[C@]([H])(C([H])([H])[H])C1([H])[H])C([H])([H])[H]	0 (Inactive)	0	0	0
844	PUBCHEM_CID_44483565	[H]OC([H])([H])[C@@]([H])(N1C(=O)c2c([H])c(N([H])C(=O)N([H])C([H])(C([H])([H])[H])C([H])([H])[H])c([H])c([H])c2O[C@]([H])(C([H])([H])N(C([H])([H])[H])C([H])([H])c2c([H])c([H])c3OC([H])([H])Oc3c2[H])[C@]([H])(C([H])([H])[H])C1([H])[H])C([H])([H])[H]	0 (Inactive)	0	0	0
845	PUBCHEM_CID_44483566	[H]OC([H])([H])[C@@]([H])(N1C(=O)c2c([H])c(N([H])C(=O)C3([H])C([H])([H])C3([H])[H])c([H])c([H])c2O[C@]([H])(C([H])([H])N([H])C([H])([H])[H])[C@]([H])(C([H])([H])[H])C1([H])[H])C([H])([H])[H]	0 (Inactive)	0	0	0
846	PUBCHEM_CID_44483567	[H]OC([H])([H])[C@@]([H])(N1C(=O)c2c([H])c(N([H])C(=O)N([H])C([H])(C([H])([H])[H])C([H])([H])[H])c([H])c([H])c2O[C@]([H])(C([H])([H])N(C([H])([H])[H])C([H])([H])C2([H])C([H])([H])C([H])([H])C([H])([H])C([H])([H])C2([H])[H])[C@]([H])(C([H])([H])[H])C1([H])[H])C([H])([H])[H]	0 (Inactive)	0	0	0
847	PUBCHEM_CID_44483568	[H]OC([H])([H])[C@@]([H])(N1C(=O)c2c([H])c(N([H])S(=O)(=O)c3c([H])c([H])c([H])c([H])c3[H])c([H])c([H])c2O[C@]([H])(C([H])([H])N(C([H])([H])[H])C([H])([H])c2c([H])c([H])nc([H])c2[H])[C@]([H])(C([H])([H])[H])C1([H])[H])C([H])([H])[H]	0 (Inactive)	0	0	0
848	PUBCHEM_CID_44483569	[H]OC([H])([H])[C@@]([H])(N1C(=O)c2c([H])c(N([H])S(=O)(=O)C([H])([H])[H])c([H])c([H])c2O[C@]([H])(C([H])([H])N(C([H])([H])[H])C([H])([H])c2c([H])c([H])c3OC([H])([H])Oc3c2[H])[C@]([H])(C([H])([H])[H])C1([H])[H])C([H])([H])[H]	0 (Inactive)	0	0	0
849	PUBCHEM_CID_44483570	[H]OC([H])([H])[C@@]([H])(N1C(=O)c2c([H])c(N([H])S(=O)(=O)C([H])([H])[H])c([H])c([H])c2O[C@]([H])(C([H])([H])N(C(=O)N([H])c2c([H])c([H])c(F)c([H])c2[H])C([H])([H])[H])[C@]([H])(C([H])([H])[H])C1([H])[H])C([H])([H])[H]	0 (Inactive)	0	0	0
850	PUBCHEM_CID_44483571	[H]OC([H])([H])[C@]([H])(N1C(=O)c2c([H])c(N([H])S(=O)(=O)C([H])([H])[H])c([H])c([H])c2O[C@]([H])(C([H])([H])N(C([H])([H])[H])C([H])([H])C2([H])C([H])([H])C([H])([H])C([H])([H])C([H])([H])C2([H])[H])[C@]([H])(C([H])([H])[H])C1([H])[H])C([H])([H])[H]	0 (Inactive)	0	0	0
851	PUBCHEM_CID_44483572	[H]OC([H])([H])[C@@]([H])(N1C(=O)c2c([H])c(N([H])C(=O)C3([H])C([H])([H])C3([H])[H])c([H])c([H])c2O[C@]([H])(C([H])([H])N(C([H])([H])[H])S(=O)(=O)c2sc([H])c([H])c2[H])[C@]([H])(C([H])([H])[H])C1([H])[H])C([H])([H])[H]	0 (Inactive)	0	0	0
852	PUBCHEM_CID_44483573	[H]OC([H])([H])[C@]([H])(N1C(=O)c2c([H])c(N([H])C(=O)N([H])C([H])(C([H])([H])[H])C([H])([H])[H])c([H])c([H])c2O[C@]([H])(C([H])([H])N(C([H])([H])[H])C([H])([H])C2([H])C([H])([H])C([H])([H])C([H])([H])C([H])([H])C2([H])[H])[C@]([H])(C([H])([H])[H])C1([H])[H])C([H])([H])[H]	0 (Inactive)	0	0	0
853	PUBCHEM_CID_44483574	[H]OC([H])([H])[C@@]([H])(N1C(=O)c2c([H])c(N([H])S(=O)(=O)c3c([H])c([H])c(F)c([H])c3[H])c([H])c([H])c2O[C@@]([H])(C([H])([H])N(C([H])([H])[H])S(=O)(=O)c2c([H])c([H])c(c([H])c2[H])C([H])([H])[H])[C@@]([H])(C([H])([H])[H])C1([H])[H])C([H])([H])[H]	0 (Inactive)	0	0	0
854	PUBCHEM_CID_44483575	[H]OC([H])([H])[C@@]([H])(N1C(=O)c2c([H])c(N([H])C(=O)N([H])c3c([H])c([H])c4OC([H])([H])Oc4c3[H])c([H])c([H])c2O[C@@]([H])(C([H])([H])N(C([H])([H])[H])S(=O)(=O)c2c([H])c([H])c(F)c([H])c2[H])[C@@]([H])(C([H])([H])[H])C1([H])[H])C([H])([H])[H]	0 (Inactive)	0	0	0
855	PUBCHEM_CID_44483576	[H]OC([H])([H])[C@]([H])(N1C(=O)c2c([H])c(N([H])C(=O)N([H])c3c([H])c([H])c(OC([H])([H])[H])c([H])c3[H])c([H])c([H])c2O[C@]([H])(C([H])([H])N(C(=O)N([H])C([H])(C([H])([H])[H])C([H])([H])[H])C([H])([H])[H])[C@]([H])(C([H])([H])[H])C1([H])[H])C([H])([H])[H]	0 (Inactive)	0	0	0
856	PUBCHEM_CID_44202449	[H]OC([H])([H])[C@@]([H])(N1C(=O)c2c([H])c(N([H])C(=O)C3([H])C([H])([H])C([H])([H])C([H])([H])C([H])([H])C3([H])[H])c([H])c([H])c2O[C@@]([H])(C([H])([H])N(C([H])([H])[H])C([H])([H])C2([H])C([H])([H])C([H])([H])C([H])([H])C([H])([H])C2([H])[H])[C@@]([H])(C([H])([H])[H])C1([H])[H])C([H])([H])[H]	0 (Inactive)	0	0	0
857	PUBCHEM_CID_44483577	[H]OC([H])([H])[C@@]([H])(N1C(=O)c2c([H])c(N([H])S(=O)(=O)c3c([H])c([H])c(Cl)c([H])c3[H])c([H])c([H])c2O[C@@]([H])(C([H])([H])N(C([H])([H])[H])S(=O)(=O)c2c([H])c([H])c(Cl)c([H])c2[H])[C@@]([H])(C([H])([H])[H])C1([H])[H])C([H])([H])[H]	0 (Inactive)	0	0	0
858	PUBCHEM_CID_44483578	[H]OC([H])([H])[C@@]([H])(N1C(=O)c2c([H])c(N([H])C(=O)N([H])c3c([H])c([H])c(F)c([H])c3[H])c([H])c([H])c2O[C@@]([H])(C([H])([H])N(C([H])([H])[H])S(=O)(=O)c2sc([H])c([H])c2[H])[C@@]([H])(C([H])([H])[H])C1([H])[H])C([H])([H])[H]	0 (Inactive)	0	0	0
859	PUBCHEM_CID_44483579	[H]OC([H])([H])[C@]([H])(N1C(=O)c2c([H])c(N([H])C(=O)N([H])c3c(noc3C([H])([H])[H])C([H])([H])[H])c([H])c([H])c2O[C@]([H])(C([H])([H])N(C([H])([H])[H])S(=O)(=O)c2sc([H])c([H])c2[H])[C@]([H])(C([H])([H])[H])C1([H])[H])C([H])([H])[H]	0 (Inactive)	0	0	0
860	PUBCHEM_CID_44483580	[H]OC([H])([H])[C@@]([H])(N1C(=O)c2c([H])c(N([H])S(=O)(=O)c3sc([H])c([H])c3[H])c([H])c([H])c2O[C@@]([H])(C([H])([H])N(C([H])([H])[H])S(=O)(=O)c2c([H])c([H])c(c([H])c2[H])C([H])([H])[H])[C@@]([H])(C([H])([H])[H])C1([H])[H])C([H])([H])[H]	0 (Inactive)	0	0	0
861	PUBCHEM_CID_44483581	[H]OC([H])([H])[C@@]([H])(N1C(=O)c2c([H])c(N([H])S(=O)(=O)c3c([H])c([H])c(OC([H])([H])[H])c([H])c3[H])c([H])c([H])c2O[C@@]([H])(C([H])([H])N(C([H])([H])[H])C([H])([H])c2c([H])c([H])nc([H])c2[H])[C@@]([H])(C([H])([H])[H])C1([H])[H])C([H])([H])[H]	0 (Inactive)	0	0	0
862	PUBCHEM_CID_44483582	[H]OC([H])([H])[C@@]([H])(N1C(=O)c2c([H])c(N([H])S(=O)(=O)c3c([H])c([H])c(F)c([H])c3[H])c([H])c([H])c2O[C@@]([H])(C([H])([H])N(C(=O)N([H])C2([H])C([H])([H])C([H])([H])C([H])([H])C([H])([H])C2([H])[H])C([H])([H])[H])[C@@]([H])(C([H])([H])[H])C1([H])[H])C([H])([H])[H]	0 (Inactive)	0	0	0
863	PUBCHEM_CID_44483583	[H]OC([H])([H])[C@@]([H])(N1C(=O)c2c([H])c(N([H])S(=O)(=O)c3c([H])c([H])c(OC([H])([H])[H])c([H])c3[H])c([H])c([H])c2O[C@@]([H])(C([H])([H])N(C([H])([H])[H])S(=O)(=O)c2c([H])c([H])c(c([H])c2[H])C([H])([H])[H])[C@@]([H])(C([H])([H])[H])C1([H])[H])C([H])([H])[H]	0 (Inactive)	0	0	0
864	PUBCHEM_CID_44483584	[H]OC([H])([H])[C@@]([H])(N1C(=O)c2c([H])c(N([H])C(=O)N([H])c3c(noc3C([H])([H])[H])C([H])([H])[H])c([H])c([H])c2O[C@@]([H])(C([H])([H])N(C(=O)N([H])C([H])(C([H])([H])[H])C([H])([H])[H])C([H])([H])[H])[C@@]([H])(C([H])([H])[H])C1([H])[H])C([H])([H])[H]	0 (Inactive)	0	0	0
865	PUBCHEM_CID_44483585	[H]OC([H])([H])[C@@]([H])(N1C(=O)c2c([H])c(N([H])C(=O)C([H])([H])C([H])([H])N3C([H])([H])C([H])([H])OC([H])([H])C3([H])[H])c([H])c([H])c2O[C@]([H])(C([H])([H])N(C(=O)N([H])c2c([H])c([H])c3OC([H])([H])Oc3c2[H])C([H])([H])[H])[C@]([H])(C([H])([H])[H])C1([H])[H])C([H])([H])[H]	0 (Inactive)	0	0	0
866	PUBCHEM_CID_44483586	[H]OC([H])([H])[C@@]([H])(N1C(=O)c2c([H])c(N([H])C(=O)C3([H])C([H])([H])C([H])([H])C([H])([H])C([H])([H])C3([H])[H])c([H])c([H])c2O[C@@]([H])(C([H])([H])N(C([H])([H])[H])S(=O)(=O)c2c([H])c([H])c(Cl)c([H])c2[H])[C@@]([H])(C([H])([H])[H])C1([H])[H])C([H])([H])[H]	0 (Inactive)	0	0	0
867	PUBCHEM_CID_44483587	[H]OC([H])([H])[C@@]([H])(N1C(=O)c2c([H])c(N([H])S(=O)(=O)c3c([H])c([H])c(c([H])c3[H])C([H])([H])[H])c([H])c([H])c2O[C@@]([H])(C([H])([H])N(C([H])([H])[H])S(=O)(=O)c2c([H])c([H])c([H])c([H])c2[H])[C@@]([H])(C([H])([H])[H])C1([H])[H])C([H])([H])[H]	0 (Inactive)	0	0	0
868	PUBCHEM_CID_44483588	[H]OC([H])([H])[C@@]([H])(N1C(=O)c2c([H])c(N([H])C(=O)C([H])([H])C([H])([H])C(F)(F)F)c([H])c([H])c2O[C@@]([H])(C([H])([H])N(C(=O)N([H])c2c([H])c([H])c(OC([H])([H])[H])c([H])c2[H])C([H])([H])[H])[C@@]([H])(C([H])([H])[H])C1([H])[H])C([H])([H])[H]	0 (Inactive)	0	0	0
869	PUBCHEM_CID_44483589	[H]OC([H])([H])[C@@]([H])(N1C(=O)c2c([H])c(N([H])S(=O)(=O)c3c(noc3C([H])([H])[H])C([H])([H])[H])c([H])c([H])c2O[C@@]([H])(C([H])([H])N(C([H])([H])[H])S(=O)(=O)c2nc([H])n(c2[H])C([H])([H])[H])[C@@]([H])(C([H])([H])[H])C1([H])[H])C([H])([H])[H]	0 (Inactive)	0	0	0
870	PUBCHEM_CID_44483590	[H]OC([H])([H])[C@@]([H])(N1C(=O)c2c([H])c(N([H])S(=O)(=O)C([H])([H])[H])c([H])c([H])c2O[C@@]([H])(C([H])([H])N(C(=O)N([H])c2c([H])c([H])c([H])c([H])c2[H])C([H])([H])[H])[C@@]([H])(C([H])([H])[H])C1([H])[H])C([H])([H])[H]	0 (Inactive)	0	0	0
871	PUBCHEM_CID_44483591	[H]OC([H])([H])[C@@]([H])(N1C(=O)c2c([H])c(N([H])S(=O)(=O)c3nc([H])n(c3[H])C([H])([H])[H])c([H])c([H])c2O[C@@]([H])(C([H])([H])N(C([H])([H])[H])S(=O)(=O)c2c([H])c([H])c(F)c([H])c2[H])[C@@]([H])(C([H])([H])[H])C1([H])[H])C([H])([H])[H]	0 (Inactive)	0	0	0
872	PUBCHEM_CID_44483592	[H]OC([H])([H])[C@@]([H])(N1C(=O)c2c([H])c(N([H])S(=O)(=O)c3c([H])c([H])c(Cl)c([H])c3[H])c([H])c([H])c2O[C@@]([H])(C([H])([H])N(C([H])([H])[H])S(=O)(=O)C([H])([H])[H])[C@@]([H])(C([H])([H])[H])C1([H])[H])C([H])([H])[H]	0 (Inactive)	0	0	0
873	PUBCHEM_CID_44483593	[H]OC([H])([H])[C@@]([H])(N1C(=O)c2c([H])c(N([H])C(=O)C3([H])C([H])([H])C3([H])[H])c([H])c([H])c2O[C@@]([H])(C([H])([H])N(C([H])([H])[H])C([H])([H])c2c([H])c([H])nc([H])c2[H])[C@@]([H])(C([H])([H])[H])C1([H])[H])C([H])([H])[H]	0 (Inactive)	0	0	0
874	PUBCHEM_CID_44483594	[H]OC([H])([H])[C@@]([H])(N1C(=O)c2c([H])c(N([H])C(=O)C3([H])C([H])([H])C3([H])[H])c([H])c([H])c2O[C@@]([H])(C([H])([H])N([H])C([H])([H])[H])[C@@]([H])(C([H])([H])[H])C1([H])[H])C([H])([H])[H]	0 (Inactive)	0	0	0
875	PUBCHEM_CID_44483595	[H]OC([H])([H])[C@@]([H])(N1C(=O)c2c([H])c(N([H])C(=O)N([H])C3([H])C([H])([H])C([H])([H])C([H])([H])C([H])([H])C3([H])[H])c([H])c([H])c2O[C@@]([H])(C([H])([H])N(C([H])([H])[H])S(=O)(=O)c2sc([H])c([H])c2[H])[C@@]([H])(C([H])([H])[H])C1([H])[H])C([H])([H])[H]	0 (Inactive)	0	0	0
876	PUBCHEM_CID_44483596	[H]OC([H])([H])[C@@]([H])(N1C(=O)c2c([H])c(N([H])C(=O)C3([H])C([H])([H])C3([H])[H])c([H])c([H])c2O[C@@]([H])(C([H])([H])N(C(=O)N([H])C([H])(C([H])([H])[H])C([H])([H])[H])C([H])([H])[H])[C@@]([H])(C([H])([H])[H])C1([H])[H])C([H])([H])[H]	0 (Inactive)	0	0	0
877	PUBCHEM_CID_44483597	[H]OC([H])([H])[C@@]([H])(N1C(=O)c2c([H])c(N([H])S(=O)(=O)c3sc([H])c([H])c3[H])c([H])c([H])c2O[C@@]([H])(C([H])([H])N(C([H])([H])[H])S(=O)(=O)c2c([H])c([H])c([H])c([H])c2[H])[C@@]([H])(C([H])([H])[H])C1([H])[H])C([H])([H])[H]	0 (Inactive)	0	0	0
878	PUBCHEM_CID_44483598	[H]OC([H])([H])[C@@]([H])(N1C(=O)c2c([H])c(N([H])C(=O)N([H])C([H])(C([H])([H])[H])C([H])([H])[H])c([H])c([H])c2O[C@@]([H])(C([H])([H])N(C([H])([H])[H])C([H])([H])C2([H])C([H])([H])C([H])([H])C([H])([H])C([H])([H])C2([H])[H])[C@@]([H])(C([H])([H])[H])C1([H])[H])C([H])([H])[H]	0 (Inactive)	0	0	0
879	PUBCHEM_CID_44483599	[H]OC([H])([H])[C@@]([H])(N1C(=O)c2c([H])c(N([H])S(=O)(=O)c3c([H])c([H])c([H])c([H])c3[H])c([H])c([H])c2O[C@@]([H])(C([H])([H])N(C(=O)N([H])c2c(noc2C([H])([H])[H])C([H])([H])[H])C([H])([H])[H])[C@@]([H])(C([H])([H])[H])C1([H])[H])C([H])([H])[H]	0 (Inactive)	0	0	0
880	PUBCHEM_CID_44483600	[H]OC([H])([H])[C@@]([H])(N1C(=O)c2c([H])c(N([H])C(=O)C3([H])C([H])([H])C3([H])[H])c([H])c([H])c2O[C@@]([H])(C([H])([H])N(C([H])([H])[H])S(=O)(=O)c2c([H])c([H])c(Cl)c([H])c2[H])[C@@]([H])(C([H])([H])[H])C1([H])[H])C([H])([H])[H]	0 (Inactive)	0	0	0
881	PUBCHEM_CID_44483601	[H]OC([H])([H])[C@@]([H])(N1C(=O)c2c([H])c(N([H])S(=O)(=O)c3c([H])c([H])c(OC([H])([H])[H])c([H])c3[H])c([H])c([H])c2O[C@@]([H])(C([H])([H])N(C(=O)N([H])c2c(noc2C([H])([H])[H])C([H])([H])[H])C([H])([H])[H])[C@@]([H])(C([H])([H])[H])C1([H])[H])C([H])([H])[H]	0 (Inactive)	0	0	0
882	PUBCHEM_CID_44483602	[H]OC([H])([H])[C@@]([H])(N1C(=O)c2c([H])c(N([H])C(=O)C3([H])C([H])([H])C3([H])[H])c([H])c([H])c2O[C@@]([H])(C([H])([H])N(C([H])([H])[H])C([H])([H])c2c([H])c([H])c(c([H])c2[H])C(F)(F)F)[C@@]([H])(C([H])([H])[H])C1([H])[H])C([H])([H])[H]	0 (Inactive)	0	0	0
883	PUBCHEM_CID_44483603	[H]OC([H])([H])[C@@]([H])(N1C(=O)c2c([H])c(N([H])C(=O)N([H])c3c([H])c([H])c(F)c([H])c3[H])c([H])c([H])c2O[C@@]([H])(C([H])([H])N(C([H])([H])[H])C([H])([H])c2c([H])c([H])c(Cl)c(Cl)c2[H])[C@@]([H])(C([H])([H])[H])C1([H])[H])C([H])([H])[H]	0 (Inactive)	0	0	0
884	PUBCHEM_CID_44483604	[H]OC([H])([H])[C@@]([H])(N1C(=O)c2c([H])c(N([H])C(=O)N([H])c3c(noc3C([H])([H])[H])C([H])([H])[H])c([H])c([H])c2O[C@@]([H])(C([H])([H])N(C([H])([H])[H])C([H])([H])c2c([H])c([H])c(c([H])c2[H])C(F)(F)F)[C@@]([H])(C([H])([H])[H])C1([H])[H])C([H])([H])[H]	0 (Inactive)	0	0	0
885	PUBCHEM_CID_44483605	[H]OC([H])([H])[C@@]([H])(N1C(=O)c2c([H])c(N([H])C(=O)C([H])([H])c3c([H])n(c4c([H])c([H])c([H])c([H])c34)C([H])([H])[H])c([H])c([H])c2O[C@@]([H])(C([H])([H])N(C([H])([H])[H])S(=O)(=O)c2sc([H])c([H])c2[H])[C@@]([H])(C([H])([H])[H])C1([H])[H])C([H])([H])[H]	0 (Inactive)	0	0	0
886	PUBCHEM_CID_44483606	[H]OC([H])([H])[C@@]([H])(N1C(=O)c2c([H])c(N([H])C(=O)C([H])([H])c3c([H])c([H])c([H])c([H])c3[H])c([H])c([H])c2O[C@@]([H])(C([H])([H])N(C([H])([H])[H])C([H])([H])c2c([H])c([H])c(c([H])c2[H])-c2c([H])c([H])c([H])c([H])c2[H])[C@@]([H])(C([H])([H])[H])C1([H])[H])C([H])([H])[H]	0 (Inactive)	0	0	0
887	PUBCHEM_CID_44483607	[H]OC(=O)c1c([H])c([H])c(c([H])c1[H])C([H])([H])N(C([H])([H])[H])C([H])([H])[C@]1([H])Oc2c([H])c([H])c(N([H])C(=O)N([H])c3c([H])c([H])c4OC([H])([H])Oc4c3[H])c([H])c2C(=O)N(C([H])([H])[C@]1([H])C([H])([H])[H])[C@@]([H])(C([H])([H])[H])C([H])([H])O[H]	0 (Inactive)	0	0	0
888	PUBCHEM_CID_44483608	[H]OC([H])([H])[C@@]([H])(N1C(=O)c2c([H])c(N([H])C(=O)C3([H])C([H])([H])C([H])([H])C([H])([H])C([H])([H])C3([H])[H])c([H])c([H])c2O[C@@]([H])(C([H])([H])N(C([H])([H])[H])C([H])([H])c2c([H])c([H])c(Cl)c(Cl)c2[H])[C@@]([H])(C([H])([H])[H])C1([H])[H])C([H])([H])[H]	0 (Inactive)	0	0	0
889	PUBCHEM_CID_44483609	[H]OC([H])([H])[C@@]([H])(N1C(=O)c2c([H])c(N([H])S(=O)(=O)c3c([H])c([H])c(c([H])c3[H])C([H])([H])[H])c([H])c([H])c2O[C@@]([H])(C([H])([H])N(C(=O)N([H])c2c([H])c([H])c(OC([H])([H])[H])c([H])c2[H])C([H])([H])[H])[C@@]([H])(C([H])([H])[H])C1([H])[H])C([H])([H])[H]	0 (Inactive)	0	0	0
890	PUBCHEM_CID_44483610	[H]OC([H])([H])[C@@]([H])(N1C(=O)c2c([H])c(N([H])C(=O)N([H])c3c(noc3C([H])([H])[H])C([H])([H])[H])c([H])c([H])c2O[C@@]([H])(C([H])([H])N(C([H])([H])[H])S(=O)(=O)c2c([H])c([H])c(c([H])c2[H])C([H])([H])[H])[C@@]([H])(C([H])([H])[H])C1([H])[H])C([H])([H])[H]	0 (Inactive)	0	0	0
891	PUBCHEM_CID_44483611	[H]OC([H])([H])[C@@]([H])(N1C(=O)c2c([H])c(N([H])S(=O)(=O)c3c([H])c([H])c(OC([H])([H])[H])c([H])c3[H])c([H])c([H])c2O[C@@]([H])(C([H])([H])N(C([H])([H])[H])S(=O)(=O)c2sc([H])c([H])c2[H])[C@@]([H])(C([H])([H])[H])C1([H])[H])C([H])([H])[H]	0 (Inactive)	0	0	0
892	PUBCHEM_CID_44483612	[H]OC([H])([H])[C@@]([H])(N1C(=O)c2c([H])c(N([H])C(=O)N([H])c3c([H])c([H])c(F)c([H])c3[H])c([H])c([H])c2O[C@@]([H])(C([H])([H])N(C([H])([H])[H])C([H])([H])c2c([H])c([H])c(Oc3c([H])c([H])c([H])c([H])c3[H])c([H])c2[H])[C@@]([H])(C([H])([H])[H])C1([H])[H])C([H])([H])[H]	0 (Inactive)	0	0	0
893	PUBCHEM_CID_44483613	[H]OC([H])([H])[C@@]([H])(N1C(=O)c2c([H])c(N([H])C(=O)N([H])C3([H])C([H])([H])C([H])([H])C([H])([H])C([H])([H])C3([H])[H])c([H])c([H])c2O[C@@]([H])(C([H])([H])N([H])C([H])([H])[H])[C@@]([H])(C([H])([H])[H])C1([H])[H])C([H])([H])[H]	0 (Inactive)	0	0	0
894	PUBCHEM_CID_44483614	[H]OC(=O)c1c([H])c([H])c(c([H])c1[H])C([H])([H])N(C([H])([H])[H])C([H])([H])[C@]1([H])Oc2c([H])c([H])c(N([H])C(=O)N([H])c3c([H])c([H])c(c([H])c3[H])C(F)(F)F)c([H])c2C(=O)N(C([H])([H])[C@]1([H])C([H])([H])[H])[C@@]([H])(C([H])([H])[H])C([H])([H])O[H]	0 (Inactive)	0	0	0
895	PUBCHEM_CID_44483615	[H]OC([H])([H])[C@@]([H])(N1C(=O)c2c([H])c(N([H])S(=O)(=O)c3c([H])c([H])c([H])c([H])c3[H])c([H])c([H])c2O[C@@]([H])(C([H])([H])N(C([H])([H])[H])S(=O)(=O)c2c([H])c([H])c(c([H])c2[H])C([H])([H])[H])[C@@]([H])(C([H])([H])[H])C1([H])[H])C([H])([H])[H]	0 (Inactive)	0	0	0
896	PUBCHEM_CID_44483616	[H]OC([H])([H])[C@@]([H])(N1C(=O)c2c([H])c(N([H])S(=O)(=O)c3c([H])c([H])c([H])c([H])c3[H])c([H])c([H])c2O[C@@]([H])(C([H])([H])N(C(=O)N([H])c2c([H])c([H])c(F)c([H])c2[H])C([H])([H])[H])[C@@]([H])(C([H])([H])[H])C1([H])[H])C([H])([H])[H]	0 (Inactive)	0	0	0
897	PUBCHEM_CID_44483617	[H]OC([H])([H])[C@]([H])(N1C(=O)c2c([H])c(N([H])C(=O)C([H])([H])C([H])([H])C([H])([H])N(C([H])([H])[H])C([H])([H])[H])c([H])c([H])c2O[C@@]([H])(C([H])([H])N(C([H])([H])[H])S(=O)(=O)c2sc([H])c([H])c2[H])[C@]([H])(C([H])([H])[H])C1([H])[H])C([H])([H])[H]	0 (Inactive)	0	0	0
898	PUBCHEM_CID_44483618	[H]OC([H])([H])[C@@]([H])(N1C(=O)c2c([H])c(N([H])C(=O)C([H])([H])C([H])([H])N3C([H])([H])C([H])([H])OC([H])([H])C3([H])[H])c([H])c([H])c2O[C@@]([H])(C([H])([H])N(C(=O)N([H])c2c([H])c([H])c3OC([H])([H])Oc3c2[H])C([H])([H])[H])[C@@]([H])(C([H])([H])[H])C1([H])[H])C([H])([H])[H]	0 (Inactive)	0	0	0
900	PUBCHEM_CID_44483620	[H]OC([H])([H])[C@@]([H])(N1C(=O)c2c([H])c(N([H])C(=O)C([H])([H])C([H])([H])N3C([H])([H])C([H])([H])OC([H])([H])C3([H])[H])c([H])c([H])c2O[C@@]([H])(C([H])([H])N(C([H])([H])[H])S(=O)(=O)c2c([H])c([H])c(c([H])c2[H])C([H])([H])[H])[C@@]([H])(C([H])([H])[H])C1([H])[H])C([H])([H])[H]	0 (Inactive)	0	0	0
901	PUBCHEM_CID_44483621	[H]OC(=O)c1c([H])c([H])c(c([H])c1[H])C([H])([H])N(C([H])([H])[H])C([H])([H])[C@]1([H])Oc2c([H])c([H])c(N([H])S(=O)(=O)c3c([H])c([H])c(Cl)c([H])c3[H])c([H])c2C(=O)N(C([H])([H])[C@]1([H])C([H])([H])[H])[C@@]([H])(C([H])([H])[H])C([H])([H])O[H]	0 (Inactive)	0	0	0
902	PUBCHEM_CID_44483622	[H]OC([H])([H])[C@@]([H])(N1C(=O)c2c([H])c(N([H])C(=O)C([H])([H])n3nnnc3[H])c([H])c([H])c2O[C@@]([H])(C([H])([H])N(C([H])([H])[H])S(=O)(=O)C([H])([H])[H])[C@@]([H])(C([H])([H])[H])C1([H])[H])C([H])([H])[H]	0 (Inactive)	0	0	0
903	PUBCHEM_CID_44483623	[H]OC([H])([H])[C@@]([H])(N1C(=O)c2c([H])c(N([H])S(=O)(=O)c3sc([H])c([H])c3[H])c([H])c([H])c2O[C@@]([H])(C([H])([H])N(C([H])([H])[H])S(=O)(=O)C([H])([H])[H])[C@@]([H])(C([H])([H])[H])C1([H])[H])C([H])([H])[H]	0 (Inactive)	0	0	0
904	PUBCHEM_CID_44483624	[H]OC([H])([H])[C@@]([H])(N1C(=O)c2c([H])c(N([H])S(=O)(=O)c3sc([H])c([H])c3[H])c([H])c([H])c2O[C@@]([H])(C([H])([H])N(C([H])([H])[H])S(=O)(=O)c2sc([H])c([H])c2[H])[C@@]([H])(C([H])([H])[H])C1([H])[H])C([H])([H])[H]	0 (Inactive)	0	0	0
905	PUBCHEM_CID_44483625	[H]OC([H])([H])[C@@]([H])(N1C(=O)c2c([H])c(N([H])C(=O)N([H])C([H])(C([H])([H])[H])C([H])([H])[H])c([H])c([H])c2O[C@@]([H])(C([H])([H])N(C([H])([H])[H])C([H])([H])c2c([H])c([H])c(Cl)c(Cl)c2[H])[C@@]([H])(C([H])([H])[H])C1([H])[H])C([H])([H])[H]	0 (Inactive)	0	0	0
906	PUBCHEM_CID_44483626	[H]OC([H])([H])[C@@]([H])(N1C(=O)c2c([H])c(N([H])S(=O)(=O)c3c([H])c([H])c(OC([H])([H])[H])c([H])c3[H])c([H])c([H])c2O[C@@]([H])(C([H])([H])N(C([H])([H])[H])S(=O)(=O)C([H])([H])[H])[C@@]([H])(C([H])([H])[H])C1([H])[H])C([H])([H])[H]	0 (Inactive)	0	0	0
907	PUBCHEM_CID_44483627	[H]OC([H])([H])[C@@]([H])(N1C(=O)c2c([H])c(N([H])C(=O)N([H])c3c([H])c([H])c4OC([H])([H])Oc4c3[H])c([H])c([H])c2O[C@@]([H])(C([H])([H])N(C([H])([H])[H])S(=O)(=O)c2sc([H])c([H])c2[H])[C@@]([H])(C([H])([H])[H])C1([H])[H])C([H])([H])[H]	0 (Inactive)	0	0	0
908	PUBCHEM_CID_44483628	[H]OC([H])([H])[C@@]([H])(N1C(=O)c2c([H])c(N([H])C(=O)N([H])C([H])(C([H])([H])[H])C([H])([H])[H])c([H])c([H])c2O[C@@]([H])(C([H])([H])N(C([H])([H])[H])S(=O)(=O)c2sc([H])c([H])c2[H])[C@@]([H])(C([H])([H])[H])C1([H])[H])C([H])([H])[H]	0 (Inactive)	0	0	0
909	PUBCHEM_CID_44483629	[H]OC([H])([H])[C@@]([H])(N1C(=O)c2c([H])c(N([H])C(=O)C([H])([H])c3c([H])c([H])c([H])c([H])c3[H])c([H])c([H])c2O[C@@]([H])(C([H])([H])N(C([H])([H])[H])C([H])([H])[H])[C@@]([H])(C([H])([H])[H])C1([H])[H])C([H])([H])[H]	0 (Inactive)	0	0	0
910	PUBCHEM_CID_44483630	[H]OC([H])([H])[C@@]([H])(N1C(=O)c2c([H])c(N([H])S(=O)(=O)c3c([H])c([H])c(OC([H])([H])[H])c([H])c3[H])c([H])c([H])c2O[C@@]([H])(C([H])([H])N(C(=O)N([H])c2c([H])c([H])c3OC([H])([H])Oc3c2[H])C([H])([H])[H])[C@@]([H])(C([H])([H])[H])C1([H])[H])C([H])([H])[H]	0 (Inactive)	0	0	0
911	PUBCHEM_CID_44483631	[H]OC([H])([H])[C@@]([H])(N1C(=O)c2c([H])c(N([H])C(=O)N([H])c3c(noc3C([H])([H])[H])C([H])([H])[H])c([H])c([H])c2O[C@@]([H])(C([H])([H])N(C([H])([H])[H])S(=O)(=O)c2c([H])c([H])c(OC([H])([H])[H])c([H])c2[H])[C@@]([H])(C([H])([H])[H])C1([H])[H])C([H])([H])[H]	0 (Inactive)	0	0	0
912	PUBCHEM_CID_44483632	[H]OC([H])([H])[C@@]([H])(N1C(=O)c2c([H])c(N([H])S(=O)(=O)c3c([H])c([H])c(F)c([H])c3[H])c([H])c([H])c2O[C@@]([H])(C([H])([H])N(C(=O)N([H])c2c([H])c([H])c(F)c([H])c2[H])C([H])([H])[H])[C@@]([H])(C([H])([H])[H])C1([H])[H])C([H])([H])[H]	0 (Inactive)	0	0	0
913	PUBCHEM_CID_44483633	[H]OC([H])([H])[C@@]([H])(N1C(=O)c2c([H])c(N([H])S(=O)(=O)c3nc([H])n(c3[H])C([H])([H])[H])c([H])c([H])c2O[C@@]([H])(C([H])([H])N(C([H])([H])[H])S(=O)(=O)c2c([H])c([H])c([H])c([H])c2[H])[C@@]([H])(C([H])([H])[H])C1([H])[H])C([H])([H])[H]	0 (Inactive)	0	0	0
914	PUBCHEM_CID_44483634	[H]OC([H])([H])[C@@]([H])(N1C(=O)c2c([H])c(N([H])S(=O)(=O)C([H])([H])[H])c([H])c([H])c2O[C@@]([H])(C([H])([H])N(C([H])([H])[H])S(=O)(=O)C([H])([H])[H])[C@@]([H])(C([H])([H])[H])C1([H])[H])C([H])([H])[H]	0 (Inactive)	0	0	0
916	PUBCHEM_CID_44483636	[H]OC([H])([H])[C@@]([H])(N1C(=O)c2c([H])c(N([H])C(=O)C([H])([H])c3c([H])n(c4c([H])c([H])c([H])c([H])c34)C([H])([H])[H])c([H])c([H])c2O[C@@]([H])(C([H])([H])N(C([H])([H])[H])C([H])([H])C2([H])C([H])([H])C([H])([H])C([H])([H])C([H])([H])C2([H])[H])[C@@]([H])(C([H])([H])[H])C1([H])[H])C([H])([H])[H]	0 (Inactive)	0	0	0
917	PUBCHEM_CID_44483637	[H]OC([H])([H])[C@@]([H])(N1C(=O)c2c([H])c(N([H])S(=O)(=O)c3c([H])c([H])c(F)c([H])c3[H])c([H])c([H])c2O[C@@]([H])(C([H])([H])N(C([H])([H])[H])S(=O)(=O)c2sc([H])c([H])c2[H])[C@@]([H])(C([H])([H])[H])C1([H])[H])C([H])([H])[H]	0 (Inactive)	0	0	0
918	PUBCHEM_CID_44483638	[H]OC([H])([H])[C@@]([H])(N1C(=O)c2c([H])c(N([H])C(=O)C([H])([H])c3c([H])c([H])c([H])c([H])c3[H])c([H])c([H])c2O[C@@]([H])(C([H])([H])N([H])C([H])([H])[H])[C@@]([H])(C([H])([H])[H])C1([H])[H])C([H])([H])[H]	0 (Inactive)	0	0	0
919	PUBCHEM_CID_44483639	[H]OC([H])([H])[C@@]([H])(N1C(=O)c2c([H])c(N([H])S(=O)(=O)c3c([H])c([H])c(OC([H])([H])[H])c([H])c3[H])c([H])c([H])c2O[C@@]([H])(C([H])([H])N(C([H])([H])[H])C([H])([H])c2c([H])c([H])c(c([H])c2[H])C(F)(F)F)[C@@]([H])(C([H])([H])[H])C1([H])[H])C([H])([H])[H]	0 (Inactive)	0	0	0
920	PUBCHEM_CID_44483640	[H]OC([H])([H])[C@@]([H])(N1C(=O)c2c([H])c(N([H])C(=O)C([H])([H])n3nnnc3[H])c([H])c([H])c2O[C@@]([H])(C([H])([H])N(C([H])([H])[H])S(=O)(=O)c2nc([H])n(c2[H])C([H])([H])[H])[C@@]([H])(C([H])([H])[H])C1([H])[H])C([H])([H])[H]	0 (Inactive)	0	0	0
921	PUBCHEM_CID_44483641	[H]OC([H])([H])[C@@]([H])(N1C(=O)c2c([H])c(N([H])S(=O)(=O)c3nc([H])n(c3[H])C([H])([H])[H])c([H])c([H])c2O[C@@]([H])(C([H])([H])N(C([H])([H])[H])S(=O)(=O)c2nc([H])n(c2[H])C([H])([H])[H])[C@@]([H])(C([H])([H])[H])C1([H])[H])C([H])([H])[H]	0 (Inactive)	0	0	0
922	PUBCHEM_CID_44483642	[H]OC([H])([H])[C@@]([H])(N1C(=O)c2c([H])c(N([H])S(=O)(=O)c3nc([H])n(c3[H])C([H])([H])[H])c([H])c([H])c2O[C@@]([H])(C([H])([H])N(C(=O)N([H])c2c(noc2C([H])([H])[H])C([H])([H])[H])C([H])([H])[H])[C@@]([H])(C([H])([H])[H])C1([H])[H])C([H])([H])[H]	0 (Inactive)	0	0	0
923	PUBCHEM_CID_44483643	[H]OC([H])([H])[C@@]([H])(N1C(=O)c2c([H])c(N([H])C(=O)N([H])c3c([H])c([H])c([H])c([H])c3[H])c([H])c([H])c2O[C@@]([H])(C([H])([H])N(C([H])([H])[H])C([H])([H])[H])[C@@]([H])(C([H])([H])[H])C1([H])[H])C([H])([H])[H]	0 (Inactive)	0	0	0
924	PUBCHEM_CID_44483644	[H]OC([H])([H])[C@@]([H])(N1C(=O)c2c([H])c(N([H])S(=O)(=O)c3sc([H])c([H])c3[H])c([H])c([H])c2O[C@@]([H])(C([H])([H])N(C([H])([H])[H])S(=O)(=O)c2c([H])c([H])c(F)c([H])c2[H])[C@@]([H])(C([H])([H])[H])C1([H])[H])C([H])([H])[H]	0 (Inactive)	0	0	0
925	PUBCHEM_CID_44483645	[H]OC([H])([H])[C@@]([H])(N1C(=O)c2c([H])c(N([H])S(=O)(=O)c3c(noc3C([H])([H])[H])C([H])([H])[H])c([H])c([H])c2O[C@@]([H])(C([H])([H])N(C(=O)N([H])c2c([H])c([H])c(c([H])c2[H])C(F)(F)F)C([H])([H])[H])[C@@]([H])(C([H])([H])[H])C1([H])[H])C([H])([H])[H]	0 (Inactive)	0	0	0
926	PUBCHEM_CID_44483646	[H]OC([H])([H])[C@@]([H])(N1C(=O)c2c([H])c(N([H])C(=O)C([H])([H])C([H])([H])N3C([H])([H])C([H])([H])OC([H])([H])C3([H])[H])c([H])c([H])c2O[C@@]([H])(C([H])([H])N(C([H])([H])[H])S(=O)(=O)c2c([H])c([H])c(OC([H])([H])[H])c([H])c2[H])[C@@]([H])(C([H])([H])[H])C1([H])[H])C([H])([H])[H]	0 (Inactive)	0	0	0
927	PUBCHEM_CID_44483647	[H]OC([H])([H])[C@@]([H])(N1C(=O)c2c([H])c(N([H])C(=O)C([H])([H])c3c([H])n(c4c([H])c([H])c([H])c([H])c34)C([H])([H])[H])c([H])c([H])c2O[C@@]([H])(C([H])([H])N(C([H])([H])[H])S(=O)(=O)c2c([H])c([H])c([H])c([H])c2[H])[C@@]([H])(C([H])([H])[H])C1([H])[H])C([H])([H])[H]	0 (Inactive)	0	0	0
928	PUBCHEM_CID_44483648	[H]OC([H])([H])[C@@]([H])(N1C(=O)c2c([H])c(N([H])C(=O)C3([H])C([H])([H])C3([H])[H])c([H])c([H])c2O[C@@]([H])(C([H])([H])N(C([H])([H])[H])C([H])([H])c2c([H])c([H])c(Oc3c([H])c([H])c([H])c([H])c3[H])c([H])c2[H])[C@@]([H])(C([H])([H])[H])C1([H])[H])C([H])([H])[H]	0 (Inactive)	0	0	0
929	PUBCHEM_CID_44483649	[H]OC([H])([H])[C@@]([H])(N1C(=O)c2c([H])c(N([H])C(=O)C([H])([H])n3nnnc3[H])c([H])c([H])c2O[C@@]([H])(C([H])([H])N(C([H])([H])[H])S(=O)(=O)c2c([H])c([H])c(c([H])c2[H])C([H])([H])[H])[C@@]([H])(C([H])([H])[H])C1([H])[H])C([H])([H])[H]	0 (Inactive)	0	0	0
930	PUBCHEM_CID_44483650	[H]OC([H])([H])[C@@]([H])(N1C(=O)c2c([H])c(N([H])S(=O)(=O)C([H])([H])[H])c([H])c([H])c2O[C@@]([H])(C([H])([H])N(C([H])([H])[H])C([H])([H])[H])[C@@]([H])(C([H])([H])[H])C1([H])[H])C([H])([H])[H]	0 (Inactive)	0	0	0
931	PUBCHEM_CID_44483651	[H]OC([H])([H])[C@@]([H])(N1C(=O)c2c([H])c(N([H])S(=O)(=O)c3c([H])c([H])c([H])c([H])c3[H])c([H])c([H])c2O[C@@]([H])(C([H])([H])N(C(=O)N([H])c2c([H])c([H])c(c([H])c2[H])C(F)(F)F)C([H])([H])[H])[C@@]([H])(C([H])([H])[H])C1([H])[H])C([H])([H])[H]	0 (Inactive)	0	0	0
933	PUBCHEM_CID_44483653	[H]OC([H])([H])[C@@]([H])(N1C(=O)c2c([H])c(N([H])C(=O)C3([H])C([H])([H])C([H])([H])C([H])([H])C([H])([H])C3([H])[H])c([H])c([H])c2O[C@@]([H])(C([H])([H])N(C([H])([H])[H])C([H])([H])[H])[C@@]([H])(C([H])([H])[H])C1([H])[H])C([H])([H])[H]	0 (Inactive)	0	0	0
934	PUBCHEM_CID_44483654	[H]OC([H])([H])[C@@]([H])(N1C(=O)c2c([H])c(N([H])C(=O)C3([H])C([H])([H])C3([H])[H])c([H])c([H])c2O[C@@]([H])(C([H])([H])N(C([H])([H])[H])C([H])([H])c2c([H])c([H])c([H])c([H])c2[H])[C@@]([H])(C([H])([H])[H])C1([H])[H])C([H])([H])[H]	0 (Inactive)	0	0	0
935	PUBCHEM_CID_44483655	[H]OC(=O)c1c([H])c([H])c(c([H])c1[H])C([H])([H])N(C([H])([H])[H])C([H])([H])[C@]1([H])Oc2c([H])c([H])c(N([H])S(=O)(=O)c3c([H])c([H])c(F)c([H])c3[H])c([H])c2C(=O)N(C([H])([H])[C@]1([H])C([H])([H])[H])[C@@]([H])(C([H])([H])[H])C([H])([H])O[H]	0 (Inactive)	0	0	0
936	PUBCHEM_CID_44483656	[H]OC([H])([H])[C@@]([H])(N1C(=O)c2c([H])c(N([H])C(=O)N([H])c3c([H])c([H])c([H])c([H])c3[H])c([H])c([H])c2O[C@@]([H])(C([H])([H])N(C([H])([H])[H])C([H])([H])C2([H])C([H])([H])C([H])([H])C([H])([H])C([H])([H])C2([H])[H])[C@@]([H])(C([H])([H])[H])C1([H])[H])C([H])([H])[H]	0 (Inactive)	0	0	0
937	PUBCHEM_CID_44483657	[H]OC([H])([H])[C@@]([H])(N1C(=O)c2c([H])c(N([H])C(=O)C3([H])C([H])([H])C3([H])[H])c([H])c([H])c2O[C@@]([H])(C([H])([H])N(C([H])([H])[H])S(=O)(=O)c2sc([H])c([H])c2[H])[C@@]([H])(C([H])([H])[H])C1([H])[H])C([H])([H])[H]	0 (Inactive)	0	0	0
938	PUBCHEM_CID_44483658	[H]OC([H])([H])[C@@]([H])(N1C(=O)c2c([H])c(N([H])C(=O)C([H])([H])C([H])([H])C(F)(F)F)c([H])c([H])c2O[C@@]([H])(C([H])([H])N(C(=O)N([H])c2c(noc2C([H])([H])[H])C([H])([H])[H])C([H])([H])[H])[C@@]([H])(C([H])([H])[H])C1([H])[H])C([H])([H])[H]	0 (Inactive)	0	0	0
939	PUBCHEM_CID_44483659	[H]OC([H])([H])[C@@]([H])(N1C(=O)c2c([H])c(N([H])C(=O)N([H])c3c([H])c([H])c4OC([H])([H])Oc4c3[H])c([H])c([H])c2O[C@@]([H])(C([H])([H])N(C(=O)N([H])C([H])(C([H])([H])[H])C([H])([H])[H])C([H])([H])[H])[C@@]([H])(C([H])([H])[H])C1([H])[H])C([H])([H])[H]	0 (Inactive)	0	0	0
940	PUBCHEM_CID_44483660	[H]OC([H])([H])[C@@]([H])(N1C(=O)c2c([H])c(N([H])C(=O)N([H])c3c([H])c([H])c(F)c([H])c3[H])c([H])c([H])c2O[C@@]([H])(C([H])([H])N(C([H])([H])[H])C([H])([H])C2([H])C([H])([H])C([H])([H])C([H])([H])C([H])([H])C2([H])[H])[C@@]([H])(C([H])([H])[H])C1([H])[H])C([H])([H])[H]	0 (Inactive)	0	0	0
941	PUBCHEM_CID_44483661	[H]OC(=O)c1c([H])c([H])c(c([H])c1[H])C([H])([H])N(C([H])([H])[H])C([H])([H])[C@]1([H])Oc2c([H])c([H])c(N([H])C(=O)C([H])([H])c3c([H])c([H])c([H])c([H])c3[H])c([H])c2C(=O)N(C([H])([H])[C@]1([H])C([H])([H])[H])[C@@]([H])(C([H])([H])[H])C([H])([H])O[H]	0 (Inactive)	0	0	0
942	PUBCHEM_CID_44202358	[H]OC([H])([H])[C@@]([H])(N1C(=O)c2c([H])c(N([H])C(=O)C([H])([H])c3c([H])c([H])c([H])c([H])c3[H])c([H])c([H])c2O[C@@]([H])(C([H])([H])N(C([H])([H])[H])C([H])([H])c2c([H])c([H])c([H])c([H])c2[H])[C@@]([H])(C([H])([H])[H])C1([H])[H])C([H])([H])[H]	0 (Inactive)	0	0	0
943	PUBCHEM_CID_44483662	[H]OC([H])([H])[C@@]([H])(N1C(=O)c2c([H])c(N([H])S(=O)(=O)c3c(noc3C([H])([H])[H])C([H])([H])[H])c([H])c([H])c2O[C@@]([H])(C([H])([H])N(C([H])([H])[H])S(=O)(=O)c2sc([H])c([H])c2[H])[C@@]([H])(C([H])([H])[H])C1([H])[H])C([H])([H])[H]	0 (Inactive)	0	0	0
944	PUBCHEM_CID_44483663	[H]OC([H])([H])[C@@]([H])(N1C(=O)c2c([H])c(N([H])C(=O)C([H])([H])C([H])([H])N3C([H])([H])C([H])([H])OC([H])([H])C3([H])[H])c([H])c([H])c2O[C@@]([H])(C([H])([H])N(C(=O)N([H])c2c([H])c([H])c(OC([H])([H])[H])c([H])c2[H])C([H])([H])[H])[C@@]([H])(C([H])([H])[H])C1([H])[H])C([H])([H])[H]	0 (Inactive)	0	0	0
945	PUBCHEM_CID_44483664	[H]OC([H])([H])[C@@]([H])(N1C(=O)c2c([H])c(N([H])C(=O)N([H])C3([H])C([H])([H])C([H])([H])C([H])([H])C([H])([H])C3([H])[H])c([H])c([H])c2O[C@@]([H])(C([H])([H])N(C(=O)N([H])C([H])(C([H])([H])[H])C([H])([H])[H])C([H])([H])[H])[C@@]([H])(C([H])([H])[H])C1([H])[H])C([H])([H])[H]	0 (Inactive)	0	0	0
946	PUBCHEM_CID_44483665	[H]OC([H])([H])[C@@]([H])(N1C(=O)c2c([H])c(N([H])C(=O)C([H])([H])c3c([H])c([H])c([H])c([H])c3[H])c([H])c([H])c2O[C@@]([H])(C([H])([H])N(C(=O)N([H])c2c([H])c([H])c(OC([H])([H])[H])c([H])c2[H])C([H])([H])[H])[C@@]([H])(C([H])([H])[H])C1([H])[H])C([H])([H])[H]	0 (Inactive)	0	0	0
947	PUBCHEM_CID_44483666	[H]OC([H])([H])[C@@]([H])(N1C(=O)c2c([H])c(N([H])S(=O)(=O)c3c(noc3C([H])([H])[H])C([H])([H])[H])c([H])c([H])c2O[C@@]([H])(C([H])([H])N(C([H])([H])[H])C([H])([H])C2([H])C([H])([H])C([H])([H])C([H])([H])C([H])([H])C2([H])[H])[C@@]([H])(C([H])([H])[H])C1([H])[H])C([H])([H])[H]	0 (Inactive)	0	0	0
948	PUBCHEM_CID_44202507	[H]OC([H])([H])[C@@]([H])(N1C(=O)c2c([H])c(N([H])C(=O)N([H])c3c([H])c([H])c([H])c4c([H])c([H])c([H])c([H])c34)c([H])c([H])c2O[C@@]([H])(C([H])([H])N([H])C([H])([H])[H])[C@@]([H])(C([H])([H])[H])C1([H])[H])C([H])([H])[H]	0 (Inactive)	0	0	0
949	PUBCHEM_CID_44483667	[H]OC(=O)c1c([H])c([H])c(c([H])c1[H])C([H])([H])N(C([H])([H])[H])C([H])([H])[C@]1([H])Oc2c([H])c([H])c(N([H])S(=O)(=O)c3c(noc3C([H])([H])[H])C([H])([H])[H])c([H])c2C(=O)N(C([H])([H])[C@]1([H])C([H])([H])[H])[C@@]([H])(C([H])([H])[H])C([H])([H])O[H]	0 (Inactive)	0	0	0
950	PUBCHEM_CID_44483668	[H]OC([H])([H])[C@@]([H])(N1C(=O)c2c([H])c(N([H])C(=O)N([H])C3([H])C([H])([H])C([H])([H])C([H])([H])C([H])([H])C3([H])[H])c([H])c([H])c2O[C@@]([H])(C([H])([H])N(C([H])([H])[H])S(=O)(=O)C([H])([H])[H])[C@@]([H])(C([H])([H])[H])C1([H])[H])C([H])([H])[H]	0 (Inactive)	0	0	0
951	PUBCHEM_CID_44483669	[H]OC([H])([H])[C@@]([H])(N1C(=O)c2c([H])c(N([H])C(=O)C([H])([H])c3c([H])n(c4c([H])c([H])c([H])c([H])c34)C([H])([H])[H])c([H])c([H])c2O[C@@]([H])(C([H])([H])N(C([H])([H])[H])S(=O)(=O)c2nc([H])n(c2[H])C([H])([H])[H])[C@@]([H])(C([H])([H])[H])C1([H])[H])C([H])([H])[H]	0 (Inactive)	0	0	0
952	PUBCHEM_CID_44483670	[H]OC([H])([H])[C@@]([H])(N1C(=O)c2c([H])c(N([H])C(=O)N([H])c3c([H])c([H])c([H])c4c([H])c([H])c([H])c([H])c34)c([H])c([H])c2O[C@@]([H])(C([H])([H])N(C([H])([H])[H])C([H])([H])c2c([H])c([H])c(Cl)c(Cl)c2[H])[C@@]([H])(C([H])([H])[H])C1([H])[H])C([H])([H])[H]	0 (Inactive)	0	0	0
953	PUBCHEM_CID_44483671	[H]OC([H])([H])[C@]([H])(N1C(=O)c2c([H])c(N([H])C(=O)N([H])c3c([H])c([H])c(F)c([H])c3[H])c([H])c([H])c2O[C@]([H])(C([H])([H])N(C([H])([H])[H])C([H])([H])c2c([H])c([H])c3OC([H])([H])Oc3c2[H])[C@@]([H])(C([H])([H])[H])C1([H])[H])C([H])([H])[H]	0 (Inactive)	0	0	0
954	PUBCHEM_CID_44202606	[H]OC([H])([H])[C@]([H])(N1C(=O)c2c([H])c(N([H])C(=O)N([H])c3c(noc3C([H])([H])[H])C([H])([H])[H])c([H])c([H])c2O[C@]([H])(C([H])([H])N(C(=O)N([H])C2([H])C([H])([H])C([H])([H])C([H])([H])C([H])([H])C2([H])[H])C([H])([H])[H])[C@@]([H])(C([H])([H])[H])C1([H])[H])C([H])([H])[H]	0 (Inactive)	0	0	0
955	PUBCHEM_CID_44483673	[H]OC([H])([H])[C@]([H])(N1C(=O)c2c([H])c(N([H])C(=O)C([H])([H])C([H])([H])C([H])([H])N(C([H])([H])[H])C([H])([H])[H])c([H])c([H])c2O[C@]([H])(C([H])([H])N([H])C([H])([H])[H])[C@@]([H])(C([H])([H])[H])C1([H])[H])C([H])([H])[H]	0 (Inactive)	0	0	0
956	PUBCHEM_CID_44483675	[H]OC([H])([H])[C@@]([H])(N1C(=O)c2c([H])c(N([H])C(=O)C([H])([H])c3c([H])c([H])c([H])c([H])c3[H])c([H])c([H])c2O[C@@]([H])(C([H])([H])N(C(=O)N([H])c2c([H])c([H])c([H])c([H])c2[H])C([H])([H])[H])[C@]([H])(C([H])([H])[H])C1([H])[H])C([H])([H])[H]	0 (Inactive)	0	0	0
957	PUBCHEM_CID_44483677	[H]OC([H])([H])[C@@]([H])(N1C(=O)c2c([H])c(N([H])S(=O)(=O)c3c(noc3C([H])([H])[H])C([H])([H])[H])c([H])c([H])c2O[C@@]([H])(C([H])([H])N(C(=O)N([H])c2c([H])c([H])c3OC([H])([H])Oc3c2[H])C([H])([H])[H])[C@]([H])(C([H])([H])[H])C1([H])[H])C([H])([H])[H]	0 (Inactive)	0	0	0
958	PUBCHEM_CID_44483680	[H]OC([H])([H])[C@@]([H])(N1C(=O)c2c([H])c(N([H])C(=O)C([H])([H])C([H])([H])N3C([H])([H])C([H])([H])OC([H])([H])C3([H])[H])c([H])c([H])c2O[C@@]([H])(C([H])([H])N(C([H])([H])[H])C([H])([H])[H])[C@]([H])(C([H])([H])[H])C1([H])[H])C([H])([H])[H]	0 (Inactive)	0	0	0
959	PUBCHEM_CID_44483681	[H]OC([H])([H])[C@@]([H])(N1C(=O)c2c([H])c(N([H])S(=O)(=O)c3sc([H])c([H])c3[H])c([H])c([H])c2O[C@@]([H])(C([H])([H])N(C(=O)N([H])c2c([H])c([H])c3OC([H])([H])Oc3c2[H])C([H])([H])[H])[C@]([H])(C([H])([H])[H])C1([H])[H])C([H])([H])[H]	0 (Inactive)	0	0	0
960	PUBCHEM_CID_44483682	[H]OC([H])([H])[C@@]([H])(N1C(=O)c2c([H])c(N([H])C(=O)N([H])c3c([H])c([H])c([H])c4c([H])c([H])c([H])c([H])c34)c([H])c([H])c2O[C@@]([H])(C([H])([H])N(C(=O)N([H])c2c([H])c([H])c3OC([H])([H])Oc3c2[H])C([H])([H])[H])[C@]([H])(C([H])([H])[H])C1([H])[H])C([H])([H])[H]	0 (Inactive)	0	0	0
961	PUBCHEM_CID_44483684	[H]OC([H])([H])[C@@]([H])(N1C(=O)c2c([H])c(N([H])C(=O)N([H])c3c([H])c([H])c(F)c([H])c3[H])c([H])c([H])c2O[C@@]([H])(C([H])([H])N(C([H])([H])[H])S(=O)(=O)c2sc([H])c([H])c2[H])[C@]([H])(C([H])([H])[H])C1([H])[H])C([H])([H])[H]	0 (Inactive)	0	0	0
962	PUBCHEM_CID_44483685	[H]OC([H])([H])[C@@]([H])(N1C(=O)c2c([H])c(N([H])C(=O)N([H])c3c([H])c([H])c(OC([H])([H])[H])c([H])c3[H])c([H])c([H])c2O[C@@]([H])(C([H])([H])N(C([H])([H])[H])S(=O)(=O)c2nc([H])n(c2[H])C([H])([H])[H])[C@]([H])(C([H])([H])[H])C1([H])[H])C([H])([H])[H]	0 (Inactive)	0	0	0
963	PUBCHEM_CID_44483686	[H]OC([H])([H])[C@@]([H])(N1C(=O)c2c([H])c(N([H])C(=O)C3([H])C([H])([H])C3([H])[H])c([H])c([H])c2O[C@@]([H])(C([H])([H])N(C([H])([H])[H])C([H])([H])c2c([H])c([H])c(c([H])c2[H])C(F)(F)F)[C@]([H])(C([H])([H])[H])C1([H])[H])C([H])([H])[H]	0 (Inactive)	0	0	0
964	PUBCHEM_CID_44483687	[H]OC([H])([H])[C@@]([H])(N1C(=O)c2c([H])c(N([H])C(=O)N([H])C3([H])C([H])([H])C([H])([H])C([H])([H])C([H])([H])C3([H])[H])c([H])c([H])c2O[C@@]([H])(C([H])([H])N([H])C([H])([H])[H])[C@]([H])(C([H])([H])[H])C1([H])[H])C([H])([H])[H]	0 (Inactive)	0	0	0
965	PUBCHEM_CID_44483688	[H]OC([H])([H])[C@@]([H])(N1C(=O)c2c([H])c(N([H])C(=O)N([H])C3([H])C([H])([H])C([H])([H])C([H])([H])C([H])([H])C3([H])[H])c([H])c([H])c2O[C@@]([H])(C([H])([H])N(C(=O)N([H])C2([H])C([H])([H])C([H])([H])C([H])([H])C([H])([H])C2([H])[H])C([H])([H])[H])[C@]([H])(C([H])([H])[H])C1([H])[H])C([H])([H])[H]	0 (Inactive)	0	0	0
966	PUBCHEM_CID_44483692	[H]OC([H])([H])[C@]([H])(N1C(=O)c2c([H])c(N([H])S(=O)(=O)c3c([H])c([H])c([H])c([H])c3[H])c([H])c([H])c2O[C@@]([H])(C([H])([H])N(C(=O)N([H])C2([H])C([H])([H])C([H])([H])C([H])([H])C([H])([H])C2([H])[H])C([H])([H])[H])[C@]([H])(C([H])([H])[H])C1([H])[H])C([H])([H])[H]	0 (Inactive)	0	0	0
967	PUBCHEM_CID_44483693	[H]OC([H])([H])[C@]([H])(N1C(=O)c2c([H])c(N([H])C(=O)N([H])c3c([H])c([H])c(F)c([H])c3[H])c([H])c([H])c2O[C@@]([H])(C([H])([H])N(C([H])([H])[H])C([H])([H])[H])[C@]([H])(C([H])([H])[H])C1([H])[H])C([H])([H])[H]	0 (Inactive)	0	0	0
968	PUBCHEM_CID_44483694	[H]OC([H])([H])[C@]([H])(N1C(=O)c2c([H])c(c([H])c([H])c2O[C@@]([H])(C([H])([H])N(C([H])([H])[H])S(=O)(=O)c2nc([H])n(c2[H])C([H])([H])[H])[C@]([H])(C([H])([H])[H])C1([H])[H])N(C([H])([H])[H])C([H])([H])[H])C([H])([H])[H]	0 (Inactive)	0	0	0
969	PUBCHEM_CID_44483695	[H]OC([H])([H])[C@]([H])(N1C(=O)c2c([H])c(N([H])C(=O)C3([H])C([H])([H])C3([H])[H])c([H])c([H])c2O[C@@]([H])(C([H])([H])N(C([H])([H])[H])C([H])([H])c2c([H])c([H])c(Cl)c(Cl)c2[H])[C@]([H])(C([H])([H])[H])C1([H])[H])C([H])([H])[H]	0 (Inactive)	0	0	0
970	PUBCHEM_CID_44483698	[H]OC([H])([H])[C@]([H])(N1C(=O)c2c([H])c(N([H])C(=O)C([H])([H])c3c([H])c([H])c([H])c([H])c3[H])c([H])c([H])c2O[C@@]([H])(C([H])([H])N(C([H])([H])[H])C([H])([H])c2c([H])c([H])c(OC([H])([H])[H])c([H])c2[H])[C@]([H])(C([H])([H])[H])C1([H])[H])C([H])([H])[H]	0 (Inactive)	0	0	0
971	PUBCHEM_CID_44483699	[H]OC([H])([H])[C@]([H])(N1C(=O)c2c([H])c(N([H])S(=O)(=O)c3nc([H])n(c3[H])C([H])([H])[H])c([H])c([H])c2O[C@@]([H])(C([H])([H])N(C([H])([H])[H])C([H])([H])[H])[C@]([H])(C([H])([H])[H])C1([H])[H])C([H])([H])[H]	0 (Inactive)	0	0	0
972	PUBCHEM_CID_44483701	[H]OC([H])([H])[C@]([H])(N1C(=O)c2c([H])c(N([H])S(=O)(=O)c3c([H])c([H])c(OC([H])([H])[H])c([H])c3[H])c([H])c([H])c2O[C@@]([H])(C([H])([H])N(C([H])([H])[H])C([H])([H])c2c([H])c([H])c(OC([H])([H])[H])c([H])c2[H])[C@]([H])(C([H])([H])[H])C1([H])[H])C([H])([H])[H]	0 (Inactive)	0	0	0
973	PUBCHEM_CID_44483702	[H]OC([H])([H])[C@]([H])(N1C(=O)c2c([H])c(N([H])S(=O)(=O)c3sc([H])c([H])c3[H])c([H])c([H])c2O[C@@]([H])(C([H])([H])N(C(=O)N([H])c2c([H])c([H])c(F)c([H])c2[H])C([H])([H])[H])[C@]([H])(C([H])([H])[H])C1([H])[H])C([H])([H])[H]	0 (Inactive)	0	0	0
974	PUBCHEM_CID_44483703	[H]OC([H])([H])[C@]([H])(N1C(=O)c2c([H])c(N([H])C(=O)N([H])c3c(noc3C([H])([H])[H])C([H])([H])[H])c([H])c([H])c2O[C@@]([H])(C([H])([H])N(C(=O)N([H])C2([H])C([H])([H])C([H])([H])C([H])([H])C([H])([H])C2([H])[H])C([H])([H])[H])[C@]([H])(C([H])([H])[H])C1([H])[H])C([H])([H])[H]	0 (Inactive)	0	0	0
975	PUBCHEM_CID_44483704	[H]OC([H])([H])[C@]([H])(N1C(=O)c2c([H])c(N([H])C(=O)C([H])([H])C([H])([H])C([H])([H])N(C([H])([H])[H])C([H])([H])[H])c([H])c([H])c2O[C@@]([H])(C([H])([H])N(C(=O)N([H])c2c([H])c([H])c([H])c3c([H])c([H])c([H])c([H])c23)C([H])([H])[H])[C@]([H])(C([H])([H])[H])C1([H])[H])C([H])([H])[H]	0 (Inactive)	0	0	0
976	PUBCHEM_CID_44483705	[H]OC([H])([H])[C@]([H])(N1C(=O)c2c([H])c(N([H])C(=O)c3c([H])c([H])nc([H])c3[H])c([H])c([H])c2O[C@@]([H])(C([H])([H])N(C(=O)N([H])c2c([H])c([H])c(F)c([H])c2[H])C([H])([H])[H])[C@]([H])(C([H])([H])[H])C1([H])[H])C([H])([H])[H]	0 (Inactive)	0	0	0
977	PUBCHEM_CID_44483707	[H]OC([H])([H])[C@]([H])(N1C(=O)c2c([H])c(N([H])C(=O)C3([H])C([H])([H])C3([H])[H])c([H])c([H])c2O[C@@]([H])(C([H])([H])N(C(=O)N([H])c2c(noc2C([H])([H])[H])C([H])([H])[H])C([H])([H])[H])[C@]([H])(C([H])([H])[H])C1([H])[H])C([H])([H])[H]	0 (Inactive)	0	0	0
978	PUBCHEM_CID_44483708	[H]OC([H])([H])[C@]([H])(N1C(=O)c2c([H])c(N([H])C(=O)C([H])([H])C([H])([H])C([H])([H])N(C([H])([H])[H])C([H])([H])[H])c([H])c([H])c2O[C@@]([H])(C([H])([H])N([H])C([H])([H])[H])[C@]([H])(C([H])([H])[H])C1([H])[H])C([H])([H])[H]	0 (Inactive)	0	0	0
979	PUBCHEM_CID_44483709	[H]OC([H])([H])[C@]([H])(N1C(=O)c2c([H])c(N([H])C(=O)N([H])C3([H])C([H])([H])C([H])([H])C([H])([H])C([H])([H])C3([H])[H])c([H])c([H])c2O[C@@]([H])(C([H])([H])N(C(=O)N([H])c2c([H])c([H])c3OC([H])([H])Oc3c2[H])C([H])([H])[H])[C@]([H])(C([H])([H])[H])C1([H])[H])C([H])([H])[H]	0 (Inactive)	0	0	0
980	PUBCHEM_CID_44483711	[H]OC([H])([H])[C@]([H])(N1C(=O)c2c([H])c(N([H])C(=O)N([H])c3c([H])c([H])c(OC([H])([H])[H])c([H])c3[H])c([H])c([H])c2O[C@@]([H])(C([H])([H])N(C([H])([H])[H])S(=O)(=O)c2nc([H])n(c2[H])C([H])([H])[H])[C@]([H])(C([H])([H])[H])C1([H])[H])C([H])([H])[H]	0 (Inactive)	0	0	0
981	PUBCHEM_CID_44483712	[H]OC([H])([H])[C@]([H])(N1C(=O)c2c([H])c(N([H])C(=O)N([H])c3c([H])c([H])c(c([H])c3[H])C(F)(F)F)c([H])c([H])c2O[C@@]([H])(C([H])([H])N(C([H])([H])[H])S(=O)(=O)c2c([H])c([H])c(OC([H])([H])[H])c([H])c2[H])[C@]([H])(C([H])([H])[H])C1([H])[H])C([H])([H])[H]	0 (Inactive)	0	0	0
982	PUBCHEM_CID_44483714	[H]OC([H])([H])[C@]([H])(N1C(=O)c2c([H])c(N([H])S(=O)(=O)c3c(noc3C([H])([H])[H])C([H])([H])[H])c([H])c([H])c2O[C@@]([H])(C([H])([H])N(C(=O)N([H])c2c([H])c([H])c([H])c([H])c2[H])C([H])([H])[H])[C@]([H])(C([H])([H])[H])C1([H])[H])C([H])([H])[H]	0 (Inactive)	0	0	0
983	PUBCHEM_CID_44483715	[H]OC([H])([H])[C@]([H])(N1C(=O)c2c([H])c(N([H])C(=O)N([H])c3c([H])c([H])c4OC([H])([H])Oc4c3[H])c([H])c([H])c2O[C@@]([H])(C([H])([H])N([H])C([H])([H])[H])[C@]([H])(C([H])([H])[H])C1([H])[H])C([H])([H])[H]	0 (Inactive)	0	0	0
984	PUBCHEM_CID_44483716	[H]OC([H])([H])[C@@]([H])(N1C(=O)c2c([H])c(N([H])C(=O)N([H])C3([H])C([H])([H])C([H])([H])C([H])([H])C([H])([H])C3([H])[H])c([H])c([H])c2O[C@]([H])(C([H])([H])N(C(=O)N([H])C2([H])C([H])([H])C([H])([H])C([H])([H])C([H])([H])C2([H])[H])C([H])([H])[H])[C@@]([H])(C([H])([H])[H])C1([H])[H])C([H])([H])[H]	0 (Inactive)	0	0	0
985	PUBCHEM_CID_44483717	[H]OC([H])([H])[C@]([H])(N1C(=O)c2c([H])c(N([H])C(=O)C([H])([H])C([H])([H])C(F)(F)F)c([H])c([H])c2O[C@@]([H])(C([H])([H])N(C(=O)N([H])c2c([H])c([H])c([H])c([H])c2[H])C([H])([H])[H])[C@]([H])(C([H])([H])[H])C1([H])[H])C([H])([H])[H]	0 (Inactive)	0	0	0
986	PUBCHEM_CID_44483718	[H]OC([H])([H])[C@]([H])(N1C(=O)c2c([H])c(N([H])C(=O)N([H])c3c([H])c([H])c4OC([H])([H])Oc4c3[H])c([H])c([H])c2O[C@@]([H])(C([H])([H])N(C([H])([H])[H])S(=O)(=O)c2c([H])c([H])c(OC([H])([H])[H])c([H])c2[H])[C@@]([H])(C([H])([H])[H])C1([H])[H])C([H])([H])[H]	0 (Inactive)	0	0	0
987	PUBCHEM_CID_44483719	[H]OC([H])([H])[C@@]([H])(N1C(=O)c2c([H])c(N([H])C(=O)C([H])([H])n3nnnc3[H])c([H])c([H])c2O[C@]([H])(C([H])([H])N(C([H])([H])[H])C([H])([H])C2([H])C([H])([H])C2([H])[H])[C@]([H])(C([H])([H])[H])C1([H])[H])C([H])([H])[H]	0 (Inactive)	0	0	0
988	PUBCHEM_CID_44483720	[H]OC([H])([H])[C@]([H])(N1C(=O)c2c([H])c([H])c([H])c(N([H])C(=O)N([H])C3([H])C([H])([H])C([H])([H])C([H])([H])C([H])([H])C3([H])[H])c2O[C@]([H])(C([H])([H])N(C([H])([H])[H])C([H])([H])c2c([H])c([H])c(OC([H])([H])[H])c([H])c2[H])[C@@]([H])(C([H])([H])[H])C1([H])[H])C([H])([H])[H]	0 (Inactive)	0	0	0
989	PUBCHEM_CID_44483721	[H]OC([H])([H])[C@]([H])(N1C(=O)c2c([H])c([H])c([H])c(N(C([H])([H])[H])C([H])([H])[H])c2O[C@]([H])(C([H])([H])N(C([H])([H])[H])C([H])([H])c2c([H])c([H])c(c([H])c2[H])C(F)(F)F)[C@@]([H])(C([H])([H])[H])C1([H])[H])C([H])([H])[H]	0 (Inactive)	0	0	0
990	PUBCHEM_CID_44483722	[H]OC([H])([H])[C@]([H])(N1C(=O)c2c([H])c([H])c([H])c(N([H])S(=O)(=O)C([H])([H])[H])c2O[C@]([H])(C([H])([H])N(C(=O)N([H])c2c([H])c([H])c([H])c([H])c2[H])C([H])([H])[H])[C@@]([H])(C([H])([H])[H])C1([H])[H])C([H])([H])[H]	0 (Inactive)	0	0	0
991	PUBCHEM_CID_44483723	[H]OC([H])([H])[C@]([H])(N1C(=O)c2c([H])c([H])c([H])c(N([H])C(=O)N([H])c3c([H])c([H])c([H])c4c([H])c([H])c([H])c([H])c34)c2O[C@]([H])(C([H])([H])N(C([H])([H])[H])S(=O)(=O)c2c([H])c([H])c(OC([H])([H])[H])c([H])c2[H])[C@@]([H])(C([H])([H])[H])C1([H])[H])C([H])([H])[H]	0 (Inactive)	0	0	0
992	PUBCHEM_CID_44483725	[H]OC([H])([H])[C@]([H])(N1C(=O)c2c([H])c([H])c([H])c(N([H])C(=O)N([H])c3c([H])c([H])c([H])c4c([H])c([H])c([H])c([H])c34)c2O[C@]([H])(C([H])([H])N(C([H])([H])[H])S(=O)(=O)c2nc([H])n(c2[H])C([H])([H])[H])[C@@]([H])(C([H])([H])[H])C1([H])[H])C([H])([H])[H]	0 (Inactive)	0	0	0
993	PUBCHEM_CID_44483727	[H]OC(=O)c1c([H])c([H])c(c([H])c1[H])C([H])([H])N(C([H])([H])[H])C([H])([H])[C@]1([H])Oc2c(N([H])C(=O)C3([H])C([H])([H])C([H])([H])OC([H])([H])C3([H])[H])c([H])c([H])c([H])c2C(=O)N(C([H])([H])[C@@]1([H])C([H])([H])[H])[C@@]([H])(C([H])([H])[H])C([H])([H])O[H]	0 (Inactive)	0	0	0
994	PUBCHEM_CID_44202533	[H]OC([H])([H])[C@@]([H])(N1C(=O)c2c([H])c([H])c([H])c(N([H])S(=O)(=O)c3sc([H])c([H])c3[H])c2O[C@@]([H])(C([H])([H])N(C([H])([H])[H])C([H])([H])c2c([H])c([H])c(c([H])c2[H])C(F)(F)F)[C@]([H])(C([H])([H])[H])C1([H])[H])C([H])([H])[H]	0 (Inactive)	0	0	0
995	PUBCHEM_CID_44483728	[H]OC([H])([H])[C@@]([H])(N1C(=O)c2c([H])c([H])c([H])c(N([H])C(=O)C3([H])C([H])([H])C([H])([H])OC([H])([H])C3([H])[H])c2O[C@@]([H])(C([H])([H])N(C([H])([H])[H])S(=O)(=O)c2nc([H])n(c2[H])C([H])([H])[H])[C@]([H])(C([H])([H])[H])C1([H])[H])C([H])([H])[H]	0 (Inactive)	0	0	0
996	PUBCHEM_CID_44483729	[H]OC(=O)c1c([H])c([H])c(c([H])c1[H])C([H])([H])N(C([H])([H])[H])C([H])([H])[C@]1([H])Oc2c(N([H])C(=O)N([H])c3c(noc3C([H])([H])[H])C([H])([H])[H])c([H])c([H])c([H])c2C(=O)N(C([H])([H])[C@@]1([H])C([H])([H])[H])[C@@]([H])(C([H])([H])[H])C([H])([H])O[H]	0 (Inactive)	0	0	0
997	PUBCHEM_CID_44483730	[H]OC([H])([H])[C@@]([H])(N1C(=O)c2c([H])c([H])c([H])c(N([H])S(=O)(=O)c3c([H])c([H])c([H])c([H])c3[H])c2O[C@@]([H])(C([H])([H])N(C(=O)N([H])c2c([H])c([H])c(c([H])c2[H])C(F)(F)F)C([H])([H])[H])[C@]([H])(C([H])([H])[H])C1([H])[H])C([H])([H])[H]	0 (Inactive)	0	0	0
998	PUBCHEM_CID_44483734	[H]OC(=O)c1c([H])c([H])c(c([H])c1[H])C([H])([H])N(C([H])([H])[H])C([H])([H])[C@]1([H])Oc2c(N([H])S(=O)(=O)c3sc([H])c([H])c3[H])c([H])c([H])c([H])c2C(=O)N(C([H])([H])[C@@]1([H])C([H])([H])[H])[C@@]([H])(C([H])([H])[H])C([H])([H])O[H]	0 (Inactive)	0	0	0
1000	PUBCHEM_CID_44483738	[H]OC([H])([H])[C@@]([H])(N1C(=O)c2c([H])c([H])c([H])c(N([H])C(=O)N([H])C3([H])C([H])([H])C([H])([H])C([H])([H])C([H])([H])C3([H])[H])c2O[C@@]([H])(C([H])([H])N(C([H])([H])[H])C([H])([H])c2c([H])c([H])nc([H])c2[H])[C@]([H])(C([H])([H])[H])C1([H])[H])C([H])([H])[H]	0 (Inactive)	0	0	0
1001	PUBCHEM_CID_44483740	[H]OC([H])([H])[C@@]([H])(N1C(=O)c2c([H])c([H])c([H])c(N([H])C(=O)c3c([H])c(nn3C([H])([H])[H])C([H])([H])[H])c2O[C@@]([H])(C([H])([H])N(C(=O)N([H])c2c([H])c([H])c([H])c([H])c2[H])C([H])([H])[H])[C@]([H])(C([H])([H])[H])C1([H])[H])C([H])([H])[H]	0 (Inactive)	0	0	0
1002	PUBCHEM_CID_44483742	[H]OC([H])([H])[C@@]([H])(N1C(=O)c2c([H])c([H])c([H])c(N([H])C(=O)N([H])c3c([H])c([H])c(c([H])c3[H])C(F)(F)F)c2O[C@@]([H])(C([H])([H])N(C(=O)N([H])c2c([H])c([H])c(F)c([H])c2[H])C([H])([H])[H])[C@]([H])(C([H])([H])[H])C1([H])[H])C([H])([H])[H]	0 (Inactive)	0	0	0
1003	PUBCHEM_CID_44483743	[H]OC([H])([H])[C@@]([H])(N1C(=O)c2c([H])c([H])c([H])c(N([H])C(=O)c3c([H])c([H])c(c([H])c3[H])-c3nc([H])c([H])s3)c2O[C@@]([H])(C([H])([H])N(C([H])([H])[H])S(=O)(=O)c2sc([H])c([H])c2[H])[C@]([H])(C([H])([H])[H])C1([H])[H])C([H])([H])[H]	0 (Inactive)	0	0	0
1004	PUBCHEM_CID_44483744	[H]OC([H])([H])[C@@]([H])(N1C(=O)c2c([H])c([H])c([H])c(N([H])S(=O)(=O)C([H])([H])[H])c2O[C@@]([H])(C([H])([H])N(C(=O)N([H])C2([H])C([H])([H])C([H])([H])C([H])([H])C([H])([H])C2([H])[H])C([H])([H])[H])[C@]([H])(C([H])([H])[H])C1([H])[H])C([H])([H])[H]	0 (Inactive)	0	0	0
1005	PUBCHEM_CID_44483746	[H]OC(=O)c1c([H])c([H])c(c([H])c1[H])C([H])([H])N(C([H])([H])[H])C([H])([H])[C@]1([H])Oc2c(c([H])c([H])c([H])c2C(=O)N(C([H])([H])[C@@]1([H])C([H])([H])[H])[C@]([H])(C([H])([H])[H])C([H])([H])O[H])N(C([H])([H])[H])C([H])([H])[H]	0 (Inactive)	0	0	0
1006	PUBCHEM_CID_44483747	[H]OC([H])([H])[C@]([H])(N1C(=O)c2c([H])c([H])c([H])c(N([H])S(=O)(=O)C([H])([H])[H])c2O[C@@]([H])(C([H])([H])N(C([H])([H])[H])S(=O)(=O)c2c([H])c([H])c(Cl)c([H])c2[H])[C@]([H])(C([H])([H])[H])C1([H])[H])C([H])([H])[H]	0 (Inactive)	0	0	0
1007	PUBCHEM_CID_44483748	[H]OC([H])([H])[C@]([H])(N1C(=O)c2c([H])c([H])c([H])c(N([H])C(=O)C3([H])C([H])([H])C([H])([H])OC([H])([H])C3([H])[H])c2O[C@@]([H])(C([H])([H])N(C(=O)N([H])c2c([H])c([H])c([H])c([H])c2[H])C([H])([H])[H])[C@]([H])(C([H])([H])[H])C1([H])[H])C([H])([H])[H]	0 (Inactive)	0	0	0
1008	PUBCHEM_CID_44483751	[H]OC([H])([H])[C@]([H])(N1C(=O)c2c([H])c([H])c([H])c(N([H])C(=O)N([H])C3([H])C([H])([H])C([H])([H])C([H])([H])C([H])([H])C3([H])[H])c2O[C@@]([H])(C([H])([H])N(C(=O)N([H])C2([H])C([H])([H])C([H])([H])C([H])([H])C([H])([H])C2([H])[H])C([H])([H])[H])[C@]([H])(C([H])([H])[H])C1([H])[H])C([H])([H])[H]	0 (Inactive)	0	0	0
1009	PUBCHEM_CID_44483752	[H]OC([H])([H])[C@]([H])(N1C(=O)c2c([H])c([H])c([H])c(N([H])C(=O)N([H])C3([H])C([H])([H])C([H])([H])C([H])([H])C([H])([H])C3([H])[H])c2O[C@@]([H])(C([H])([H])N(C([H])([H])[H])S(=O)(=O)c2nc([H])n(c2[H])C([H])([H])[H])[C@]([H])(C([H])([H])[H])C1([H])[H])C([H])([H])[H]	0 (Inactive)	0	0	0
1010	PUBCHEM_CID_44483753	[H]OC([H])([H])[C@]([H])(N1C(=O)c2c([H])c([H])c([H])c(N([H])C(=O)N([H])c3c([H])c([H])c([H])c4c([H])c([H])c([H])c([H])c34)c2O[C@@]([H])(C([H])([H])N(C(=O)N([H])c2c([H])c([H])c([H])c3c([H])c([H])c([H])c([H])c23)C([H])([H])[H])[C@]([H])(C([H])([H])[H])C1([H])[H])C([H])([H])[H]	0 (Inactive)	0	0	0
1011	PUBCHEM_CID_44483754	[H]OC([H])([H])[C@]([H])(N1C(=O)c2c([H])c([H])c([H])c(N([H])S(=O)(=O)c3nc([H])n(c3[H])C([H])([H])[H])c2O[C@@]([H])(C([H])([H])N(C([H])([H])[H])C([H])([H])C2([H])C([H])([H])C2([H])[H])[C@]([H])(C([H])([H])[H])C1([H])[H])C([H])([H])[H]	0 (Inactive)	0	0	0
1012	PUBCHEM_CID_44483756	[H]OC([H])([H])[C@]([H])(N1C(=O)c2c([H])c([H])c([H])c(N([H])C(=O)C3([H])C([H])([H])C([H])([H])OC([H])([H])C3([H])[H])c2O[C@@]([H])(C([H])([H])N(C([H])([H])[H])C([H])([H])[H])[C@]([H])(C([H])([H])[H])C1([H])[H])C([H])([H])[H]	0 (Inactive)	0	0	0
1013	PUBCHEM_CID_44483757	[H]OC([H])([H])[C@]([H])(N1C(=O)c2c([H])c([H])c([H])c(N([H])C(=O)N([H])c3c(noc3C([H])([H])[H])C([H])([H])[H])c2O[C@@]([H])(C([H])([H])N(C([H])([H])[H])S(=O)(=O)c2sc([H])c([H])c2[H])[C@]([H])(C([H])([H])[H])C1([H])[H])C([H])([H])[H]	0 (Inactive)	0	0	0
1014	PUBCHEM_CID_44483758	[H]OC([H])([H])[C@]([H])(N1C(=O)c2c([H])c([H])c([H])c(N([H])C(=O)N([H])C([H])(C([H])([H])[H])C([H])([H])[H])c2O[C@@]([H])(C([H])([H])N(C([H])([H])[H])C([H])([H])c2c([H])c([H])c(Cl)c(Cl)c2[H])[C@]([H])(C([H])([H])[H])C1([H])[H])C([H])([H])[H]	0 (Inactive)	0	0	0
1016	PUBCHEM_CID_44483760	[H]OC([H])([H])[C@]([H])(N1C(=O)c2c([H])c([H])c([H])c(N([H])S(=O)(=O)C([H])([H])[H])c2O[C@@]([H])(C([H])([H])N(C([H])([H])[H])C([H])([H])c2c([H])c([H])nc([H])c2[H])[C@]([H])(C([H])([H])[H])C1([H])[H])C([H])([H])[H]	0 (Inactive)	0	0	0
1017	PUBCHEM_CID_44483762	[H]OC([H])([H])[C@]([H])(N1C(=O)c2c([H])c([H])c([H])c(N([H])S(=O)(=O)c3c([H])c([H])c([H])c([H])c3[H])c2O[C@@]([H])(C([H])([H])N(C(=O)N([H])C2([H])C([H])([H])C([H])([H])C([H])([H])C([H])([H])C2([H])[H])C([H])([H])[H])[C@]([H])(C([H])([H])[H])C1([H])[H])C([H])([H])[H]	0 (Inactive)	0	0	0
1018	PUBCHEM_CID_44483763	[H]OC(=O)c1c([H])c([H])c(c([H])c1[H])C([H])([H])N(C([H])([H])[H])C([H])([H])[C@]1([H])Oc2c(N([H])C(=O)N([H])C3([H])C([H])([H])C([H])([H])C([H])([H])C([H])([H])C3([H])[H])c([H])c([H])c([H])c2C(=O)N(C([H])([H])[C@@]1([H])C([H])([H])[H])[C@]([H])(C([H])([H])[H])C([H])([H])O[H]	0 (Inactive)	0	0	0
1019	PUBCHEM_CID_44483764	[H]OC([H])([H])[C@]([H])(N1C(=O)c2c([H])c([H])c([H])c(N([H])C(=O)c3c([H])c(nn3C([H])([H])[H])C([H])([H])[H])c2O[C@@]([H])(C([H])([H])N(C([H])([H])[H])C([H])([H])C2([H])C([H])([H])C2([H])[H])[C@]([H])(C([H])([H])[H])C1([H])[H])C([H])([H])[H]	0 (Inactive)	0	0	0
1020	PUBCHEM_CID_44483765	[H]OC([H])([H])[C@]([H])(N1C(=O)c2c([H])c([H])c([H])c(N([H])C(=O)N([H])C3([H])C([H])([H])C([H])([H])C([H])([H])C([H])([H])C3([H])[H])c2O[C@@]([H])(C([H])([H])N(C([H])([H])[H])S(=O)(=O)c2c([H])c([H])c(OC([H])([H])[H])c([H])c2[H])[C@]([H])(C([H])([H])[H])C1([H])[H])C([H])([H])[H]	0 (Inactive)	0	0	0
1021	PUBCHEM_CID_44483766	[H]OC([H])([H])[C@]([H])(N1C(=O)c2c([H])c([H])c([H])c(N([H])C(=O)C3([H])C([H])([H])C([H])([H])OC([H])([H])C3([H])[H])c2O[C@@]([H])(C([H])([H])N(C([H])([H])[H])C([H])([H])c2c([H])c([H])c([H])c([H])c2[H])[C@]([H])(C([H])([H])[H])C1([H])[H])C([H])([H])[H]	0 (Inactive)	0	0	0
1022	PUBCHEM_CID_44483767	[H]OC([H])([H])[C@]([H])(N1C(=O)c2c([H])c([H])c([H])c(N([H])S(=O)(=O)C([H])([H])[H])c2O[C@@]([H])(C([H])([H])N(C(=O)N([H])c2c([H])c([H])c([H])c([H])c2[H])C([H])([H])[H])[C@]([H])(C([H])([H])[H])C1([H])[H])C([H])([H])[H]	0 (Inactive)	0	0	0
1023	PUBCHEM_CID_44483768	[H]OC([H])([H])[C@]([H])(N1C(=O)c2c([H])c([H])c([H])c(N([H])C(=O)c3c([H])c([H])nc([H])c3[H])c2O[C@@]([H])(C([H])([H])N(C(=O)N([H])c2c([H])c([H])c([H])c([H])c2[H])C([H])([H])[H])[C@]([H])(C([H])([H])[H])C1([H])[H])C([H])([H])[H]	0 (Inactive)	0	0	0
1024	PUBCHEM_CID_44483769	[H]OC([H])([H])[C@]([H])(N1C(=O)c2c([H])c([H])c([H])c(N([H])C(=O)c3nc4c([H])c([H])c([H])c([H])c4s3)c2O[C@@]([H])(C([H])([H])N(C(=O)N([H])C2([H])C([H])([H])C([H])([H])C([H])([H])C([H])([H])C2([H])[H])C([H])([H])[H])[C@]([H])(C([H])([H])[H])C1([H])[H])C([H])([H])[H]	0 (Inactive)	0	0	0
1025	PUBCHEM_CID_44483775	[H]OC([H])([H])[C@]([H])(N1C(=O)c2c([H])c([H])c([H])c(N([H])C(=O)c3c([H])c([H])nc([H])c3[H])c2O[C@@]([H])(C([H])([H])N(C(=O)N([H])c2c([H])c([H])c([H])c3c([H])c([H])c([H])c([H])c23)C([H])([H])[H])[C@]([H])(C([H])([H])[H])C1([H])[H])C([H])([H])[H]	0 (Inactive)	0	0	0
1026	PUBCHEM_CID_44483777	[H]OC([H])([H])[C@]([H])(N1C(=O)c2c([H])c([H])c([H])c(N([H])C(=O)C3([H])C([H])([H])C([H])([H])OC([H])([H])C3([H])[H])c2O[C@@]([H])(C([H])([H])N(C([H])([H])[H])C([H])([H])c2c([H])c([H])nc([H])c2[H])[C@]([H])(C([H])([H])[H])C1([H])[H])C([H])([H])[H]	0 (Inactive)	0	0	0
1027	PUBCHEM_CID_44483779	[H]OC([H])([H])[C@]([H])(N1C(=O)c2c([H])c([H])c([H])c(N([H])C(=O)c3c([H])c([H])c(c([H])c3[H])-c3nc([H])c([H])s3)c2O[C@@]([H])(C([H])([H])N(C([H])([H])[H])C([H])([H])c2c([H])c([H])c(OC([H])([H])[H])c([H])c2[H])[C@]([H])(C([H])([H])[H])C1([H])[H])C([H])([H])[H]	0 (Inactive)	0	0	0
1028	PUBCHEM_CID_44483780	[H]OC([H])([H])[C@]([H])(N1C(=O)c2c([H])c([H])c([H])c(N([H])S(=O)(=O)c3c([H])c([H])c([H])c([H])c3[H])c2O[C@@]([H])(C([H])([H])N(C(=O)N([H])c2c([H])c([H])c3OC([H])([H])Oc3c2[H])C([H])([H])[H])[C@]([H])(C([H])([H])[H])C1([H])[H])C([H])([H])[H]	0 (Inactive)	0	0	0
1029	PUBCHEM_CID_44483781	[H]OC([H])([H])[C@]([H])(N1C(=O)c2c([H])c([H])c([H])c(N([H])C(=O)N([H])C3([H])C([H])([H])C([H])([H])C([H])([H])C([H])([H])C3([H])[H])c2O[C@@]([H])(C([H])([H])N(C([H])([H])[H])S(=O)(=O)c2c([H])c([H])c(Cl)c([H])c2[H])[C@]([H])(C([H])([H])[H])C1([H])[H])C([H])([H])[H]	0 (Inactive)	0	0	0
1030	PUBCHEM_CID_44483782	[H]OC([H])([H])[C@]([H])(N1C(=O)c2c([H])c([H])c([H])c(N([H])C(=O)C3([H])C([H])([H])C([H])([H])OC([H])([H])C3([H])[H])c2O[C@@]([H])(C([H])([H])N(C(=O)N([H])c2c([H])c([H])c([H])c3c([H])c([H])c([H])c([H])c23)C([H])([H])[H])[C@]([H])(C([H])([H])[H])C1([H])[H])C([H])([H])[H]	0 (Inactive)	0	0	0
1031	PUBCHEM_CID_44483783	[H]OC([H])([H])[C@]([H])(N1C(=O)c2c([H])c([H])c([H])c(N([H])C(=O)c3nc4c([H])c([H])c([H])c([H])c4s3)c2O[C@@]([H])(C([H])([H])N([H])C([H])([H])[H])[C@]([H])(C([H])([H])[H])C1([H])[H])C([H])([H])[H]	0 (Inactive)	0	0	0
1033	PUBCHEM_CID_44483786	[H]OC([H])([H])[C@]([H])(N1C(=O)c2c([H])c([H])c([H])c(N([H])S(=O)(=O)c3sc([H])c([H])c3[H])c2O[C@@]([H])(C([H])([H])N(C(=O)N([H])c2c([H])c([H])c([H])c3c([H])c([H])c([H])c([H])c23)C([H])([H])[H])[C@]([H])(C([H])([H])[H])C1([H])[H])C([H])([H])[H]	0 (Inactive)	0	0	0
1034	PUBCHEM_CID_44483787	[H]OC([H])([H])[C@]([H])(N1C(=O)c2c([H])c([H])c([H])c(N([H])C(=O)N([H])C3([H])C([H])([H])C([H])([H])C([H])([H])C([H])([H])C3([H])[H])c2O[C@@]([H])(C([H])([H])N(C([H])([H])[H])S(=O)(=O)c2sc([H])c([H])c2[H])[C@]([H])(C([H])([H])[H])C1([H])[H])C([H])([H])[H]	0 (Inactive)	0	0	0
1035	PUBCHEM_CID_44483788	[H]OC([H])([H])[C@]([H])(N1C(=O)c2c([H])c([H])c([H])c(N(C([H])([H])[H])C([H])([H])[H])c2O[C@@]([H])(C([H])([H])N(C(=O)N([H])c2c([H])c([H])c(c([H])c2[H])C(F)(F)F)C([H])([H])[H])[C@]([H])(C([H])([H])[H])C1([H])[H])C([H])([H])[H]	0 (Inactive)	0	0	0
1036	PUBCHEM_CID_44483789	[H]OC([H])([H])[C@]([H])(N1C(=O)c2c([H])c([H])c([H])c(N([H])S(=O)(=O)C([H])([H])[H])c2O[C@@]([H])(C([H])([H])N(C([H])([H])[H])C([H])([H])c2c([H])c([H])c(c([H])c2[H])C(F)(F)F)[C@]([H])(C([H])([H])[H])C1([H])[H])C([H])([H])[H]	0 (Inactive)	0	0	0
1037	PUBCHEM_CID_44483790	[H]OC([H])([H])[C@]([H])(N1C(=O)c2c([H])c([H])c([H])c(N([H])C(=O)N([H])c3c([H])c([H])c(F)c([H])c3[H])c2O[C@@]([H])(C([H])([H])N(C(=O)N([H])C2([H])C([H])([H])C([H])([H])C([H])([H])C([H])([H])C2([H])[H])C([H])([H])[H])[C@]([H])(C([H])([H])[H])C1([H])[H])C([H])([H])[H]	0 (Inactive)	0	0	0
1038	PUBCHEM_CID_44483791	[H]OC(=O)c1c([H])c([H])c(c([H])c1[H])C([H])([H])N(C([H])([H])[H])C([H])([H])[C@]1([H])Oc2c(N([H])C(=O)c3c([H])c([H])nc([H])c3[H])c([H])c([H])c([H])c2C(=O)N(C([H])([H])[C@@]1([H])C([H])([H])[H])[C@]([H])(C([H])([H])[H])C([H])([H])O[H]	0 (Inactive)	0	0	0
1039	PUBCHEM_CID_44483794	[H]OC([H])([H])[C@]([H])(N1C(=O)c2c([H])c([H])c([H])c(N([H])S(=O)(=O)C([H])([H])[H])c2O[C@@]([H])(C([H])([H])N(C([H])([H])[H])C([H])([H])c2c([H])c([H])c(Cl)c(Cl)c2[H])[C@]([H])(C([H])([H])[H])C1([H])[H])C([H])([H])[H]	0 (Inactive)	0	0	0
1040	PUBCHEM_CID_44483795	[H]OC([H])([H])[C@@]([H])(N1C(=O)c2c([H])c([H])c([H])c(N([H])C(=O)N([H])C3([H])C([H])([H])C([H])([H])C([H])([H])C([H])([H])C3([H])[H])c2O[C@]([H])(C([H])([H])N(C(=O)N([H])c2c([H])c([H])c(c([H])c2[H])C(F)(F)F)C([H])([H])[H])[C@@]([H])(C([H])([H])[H])C1([H])[H])C([H])([H])[H]	0 (Inactive)	0	0	0
1041	PUBCHEM_CID_44483796	[H]OC([H])([H])[C@@]([H])(N1C(=O)c2c([H])c([H])c([H])c(N([H])S(=O)(=O)c3nc([H])n(c3[H])C([H])([H])[H])c2O[C@]([H])(C([H])([H])N(C(=O)N([H])c2c([H])c([H])c([H])c3c([H])c([H])c([H])c([H])c23)C([H])([H])[H])[C@@]([H])(C([H])([H])[H])C1([H])[H])C([H])([H])[H]	0 (Inactive)	0	0	0
1042	PUBCHEM_CID_44483797	[H]OC([H])([H])[C@@]([H])(N1C(=O)c2c([H])c([H])c([H])c(N([H])C(=O)N([H])C3([H])C([H])([H])C([H])([H])C([H])([H])C([H])([H])C3([H])[H])c2O[C@]([H])(C([H])([H])N(C([H])([H])[H])C([H])([H])c2c([H])c([H])c(OC([H])([H])[H])c([H])c2[H])[C@@]([H])(C([H])([H])[H])C1([H])[H])C([H])([H])[H]	0 (Inactive)	0	0	0
1043	PUBCHEM_CID_44483798	[H]OC([H])([H])[C@@]([H])(N1C(=O)c2c([H])c([H])c([H])c(N([H])C(=O)N([H])C3([H])C([H])([H])C([H])([H])C([H])([H])C([H])([H])C3([H])[H])c2O[C@]([H])(C([H])([H])N(C([H])([H])[H])C([H])([H])c2c([H])c([H])nc([H])c2[H])[C@]([H])(C([H])([H])[H])C1([H])[H])C([H])([H])[H]	0 (Inactive)	0	0	0
1044	PUBCHEM_CID_44483799	[H]OC([H])([H])[C@]([H])(N1C(=O)c2c([H])c(N([H])C(=O)C([H])([H])C([H])([H])C([H])([H])N(C([H])([H])[H])C([H])([H])[H])c([H])c([H])c2O[C@]([H])(C([H])([H])N(C([H])([H])[H])S(=O)(=O)c2c(noc2C([H])([H])[H])C([H])([H])[H])[C@@]([H])(C([H])([H])[H])C1([H])[H])C([H])([H])[H]	0 (Inactive)	0	0	0
1045	PUBCHEM_CID_44483800	[H]OC(=O)c1c([H])c([H])c(c([H])c1[H])C([H])([H])N(C([H])([H])[H])C([H])([H])[C@]1([H])Oc2c(N([H])S(=O)(=O)c3c(noc3C([H])([H])[H])C([H])([H])[H])c([H])c([H])c([H])c2C(=O)N(C([H])([H])[C@]1([H])C([H])([H])[H])[C@]([H])(C([H])([H])[H])C([H])([H])O[H]	0 (Inactive)	0	0	0
1046	PUBCHEM_CID_44483801	[H]OC(=O)c1c([H])c([H])c(c([H])c1[H])C([H])([H])N(C([H])([H])[H])C([H])([H])[C@]1([H])Oc2c(N([H])C(=O)N([H])c3c([H])c([H])c([H])c4c([H])c([H])c([H])c([H])c34)c([H])c([H])c([H])c2C(=O)N(C([H])([H])[C@]1([H])C([H])([H])[H])[C@]([H])(C([H])([H])[H])C([H])([H])O[H]	0 (Inactive)	0	0	0
1047	PUBCHEM_CID_44483803	[H]OC([H])([H])[C@]([H])(N1C(=O)c2c([H])c([H])c([H])c(N([H])C(=O)N([H])C3([H])C([H])([H])C([H])([H])C([H])([H])C([H])([H])C3([H])[H])c2O[C@@]([H])(C([H])([H])N(C(=O)N([H])c2c([H])c([H])c([H])c3c([H])c([H])c([H])c([H])c23)C([H])([H])[H])[C@@]([H])(C([H])([H])[H])C1([H])[H])C([H])([H])[H]	0 (Inactive)	0	0	0
1048	PUBCHEM_CID_44483804	[H]OC([H])([H])[C@]([H])(N1C(=O)c2c([H])c([H])c([H])c(N([H])C(=O)N([H])c3c([H])c([H])c([H])c4c([H])c([H])c([H])c([H])c34)c2O[C@@]([H])(C([H])([H])N(C([H])([H])[H])C([H])([H])c2c([H])c([H])nc([H])c2[H])[C@@]([H])(C([H])([H])[H])C1([H])[H])C([H])([H])[H]	0 (Inactive)	0	0	0
1049	PUBCHEM_CID_44483805	[H]OC([H])([H])[C@]([H])(N1C(=O)c2c([H])c([H])c([H])c(N([H])S(=O)(=O)c3sc([H])c([H])c3[H])c2O[C@@]([H])(C([H])([H])N(C([H])([H])[H])S(=O)(=O)c2c(noc2C([H])([H])[H])C([H])([H])[H])[C@@]([H])(C([H])([H])[H])C1([H])[H])C([H])([H])[H]	0 (Inactive)	0	0	0
1050	PUBCHEM_CID_44483806	[H]OC([H])([H])[C@@]([H])(N1C(=O)c2c([H])c([H])c([H])c(N([H])S(=O)(=O)c3c(noc3C([H])([H])[H])C([H])([H])[H])c2O[C@]([H])(C([H])([H])N(C([H])([H])[H])C([H])([H])c2c([H])c([H])nc([H])c2[H])[C@]([H])(C([H])([H])[H])C1([H])[H])C([H])([H])[H]	0 (Inactive)	0	0	0
1051	PUBCHEM_CID_44483807	[H]OC([H])([H])[C@]([H])(N1C(=O)c2c([H])c([H])c([H])c(N([H])C(=O)c3nc4c([H])c([H])c([H])c([H])c4s3)c2O[C@]([H])(C([H])([H])N(C([H])([H])[H])S(=O)(=O)c2c(noc2C([H])([H])[H])C([H])([H])[H])[C@]([H])(C([H])([H])[H])C1([H])[H])C([H])([H])[H]	0 (Inactive)	0	0	0
1052	PUBCHEM_CID_44483808	[H]OC([H])([H])[C@]([H])(N1C(=O)c2c([H])c([H])c([H])c(N([H])S(=O)(=O)c3c(noc3C([H])([H])[H])C([H])([H])[H])c2O[C@]([H])(C([H])([H])N(C([H])([H])[H])C([H])([H])c2c([H])c([H])c(c([H])c2[H])C(F)(F)F)[C@]([H])(C([H])([H])[H])C1([H])[H])C([H])([H])[H]	0 (Inactive)	0	0	0
1053	PUBCHEM_CID_44483809	[H]OC([H])([H])[C@]([H])(N1C(=O)c2c([H])c([H])c([H])c(N(C([H])([H])[H])C([H])([H])[H])c2O[C@]([H])(C([H])([H])N(C([H])([H])[H])C([H])([H])[H])[C@]([H])(C([H])([H])[H])C1([H])[H])C([H])([H])[H]	0 (Inactive)	0	0	0
1054	PUBCHEM_CID_44483812	[H]OC([H])([H])[C@]([H])(N1C(=O)c2c([H])c(N([H])C(=O)N([H])c3c([H])c([H])c([H])c4c([H])c([H])c([H])c([H])c34)c([H])c([H])c2O[C@]([H])(C([H])([H])[H])C([H])([H])C([H])([H])C([H])([H])C([H])([H])O[C@]([H])(C([H])([H])N(C([H])([H])[H])C([H])([H])[H])[C@@]([H])(C([H])([H])[H])C1([H])[H])C([H])([H])[H]	0 (Inactive)	0	0	0
1055	PUBCHEM_CID_44483813	[H]OC([H])([H])[C@]([H])(N1C(=O)c2c([H])c(N([H])C(=O)C([H])([H])C([H])([H])C(F)(F)F)c([H])c([H])c2O[C@]([H])(C([H])([H])[H])C([H])([H])C([H])([H])C([H])([H])C([H])([H])O[C@]([H])(C([H])([H])N(C(=O)N([H])c2c(noc2C([H])([H])[H])C([H])([H])[H])C([H])([H])[H])[C@@]([H])(C([H])([H])[H])C1([H])[H])C([H])([H])[H]	0 (Inactive)	0	0	0
1056	PUBCHEM_CID_44483815	[H]OC([H])([H])[C@]([H])(N1C(=O)c2c([H])c(N([H])C(=O)C3([H])C([H])([H])C([H])([H])C([H])([H])C([H])([H])C3([H])[H])c([H])c([H])c2O[C@]([H])(C([H])([H])[H])C([H])([H])C([H])([H])C([H])([H])C([H])([H])O[C@]([H])(C([H])([H])N(C([H])([H])[H])C([H])([H])[H])[C@@]([H])(C([H])([H])[H])C1([H])[H])C([H])([H])[H]	0 (Inactive)	0	0	0
1057	PUBCHEM_CID_44483816	[H]OC([H])([H])[C@]([H])(N1C(=O)c2c([H])c(N([H])C(=O)N([H])C([H])(C([H])([H])[H])C([H])([H])[H])c([H])c([H])c2O[C@]([H])(C([H])([H])[H])C([H])([H])C([H])([H])C([H])([H])C([H])([H])O[C@]([H])(C([H])([H])N(C([H])([H])[H])S(=O)(=O)c2c(noc2C([H])([H])[H])C([H])([H])[H])[C@@]([H])(C([H])([H])[H])C1([H])[H])C([H])([H])[H]	0 (Inactive)	0	0	0
1058	PUBCHEM_CID_44483818	[H]OC([H])([H])[C@]([H])(N1C(=O)c2c([H])c(c([H])c([H])c2O[C@]([H])(C([H])([H])[H])C([H])([H])C([H])([H])C([H])([H])C([H])([H])O[C@]([H])(C([H])([H])N(C(=O)N([H])c2c(noc2C([H])([H])[H])C([H])([H])[H])C([H])([H])[H])[C@@]([H])(C([H])([H])[H])C1([H])[H])N(C([H])([H])[H])C([H])([H])[H])C([H])([H])[H]	0 (Inactive)	0	0	0
1059	PUBCHEM_CID_44483820	[H]OC([H])([H])[C@]([H])(N1C(=O)c2c([H])c(N([H])C(=O)c3c([H])c([H])nc([H])c3[H])c([H])c([H])c2O[C@]([H])(C([H])([H])[H])C([H])([H])C([H])([H])C([H])([H])C([H])([H])O[C@]([H])(C([H])([H])N(C(=O)C([H])([H])c2c([H])c([H])c([H])c([H])c2[H])C([H])([H])[H])[C@@]([H])(C([H])([H])[H])C1([H])[H])C([H])([H])[H]	0 (Inactive)	0	0	0
1060	PUBCHEM_CID_44483821	[H]OC([H])([H])[C@]([H])(N1C(=O)c2c([H])c(c([H])c([H])c2O[C@]([H])(C([H])([H])[H])C([H])([H])C([H])([H])C([H])([H])C([H])([H])O[C@@]([H])(C([H])([H])N(C([H])([H])[H])C([H])([H])c2c([H])c([H])c([H])c([H])c2[H])[C@@]([H])(C([H])([H])[H])C1([H])[H])N(C([H])([H])[H])C([H])([H])[H])C([H])([H])[H]	0 (Inactive)	0	0	0
1061	PUBCHEM_CID_44483822	[H]OC([H])([H])[C@]([H])(N1C(=O)c2c([H])c(N([H])C(=O)C([H])([H])C([H])([H])C(F)(F)F)c([H])c([H])c2O[C@]([H])(C([H])([H])[H])C([H])([H])C([H])([H])C([H])([H])C([H])([H])O[C@@]([H])(C([H])([H])N(C(=O)c2c([H])c([H])nc([H])c2[H])C([H])([H])[H])[C@@]([H])(C([H])([H])[H])C1([H])[H])C([H])([H])[H]	0 (Inactive)	0	0	0
1062	PUBCHEM_CID_44483824	[H]OC([H])([H])[C@]([H])(N1C(=O)c2c([H])c(N([H])C(=O)N([H])C([H])(C([H])([H])[H])C([H])([H])[H])c([H])c([H])c2O[C@]([H])(C([H])([H])[H])C([H])([H])C([H])([H])C([H])([H])C([H])([H])O[C@@]([H])(C([H])([H])N(C([H])([H])[H])S(=O)(=O)c2c([H])c([H])c([H])c([H])c2[H])[C@@]([H])(C([H])([H])[H])C1([H])[H])C([H])([H])[H]	0 (Inactive)	0	0	0
1063	PUBCHEM_CID_44483827	[H]OC([H])([H])[C@]([H])(N1C(=O)c2c([H])c(N([H])C(=O)c3c([H])c([H])nc([H])c3[H])c([H])c([H])c2O[C@]([H])(C([H])([H])[H])C([H])([H])C([H])([H])C([H])([H])C([H])([H])O[C@@]([H])(C([H])([H])N(C(=O)N([H])c2c([H])c([H])c([H])c3c([H])c([H])c([H])c([H])c23)C([H])([H])[H])[C@@]([H])(C([H])([H])[H])C1([H])[H])C([H])([H])[H]	0 (Inactive)	0	0	0
1064	PUBCHEM_CID_44483830	[H]OC([H])([H])[C@]([H])(N1C(=O)c2c([H])c(N([H])C(=O)N([H])c3c([H])c([H])c([H])c([H])c3[H])c([H])c([H])c2O[C@]([H])(C([H])([H])[H])C([H])([H])C([H])([H])C([H])([H])C([H])([H])O[C@@]([H])(C([H])([H])N(C([H])([H])[H])C([H])([H])[H])[C@@]([H])(C([H])([H])[H])C1([H])[H])C([H])([H])[H]	0 (Inactive)	0	0	0
1065	PUBCHEM_CID_44483831	[H]OC([H])([H])[C@]([H])(N1C(=O)c2c([H])c(N([H])S(=O)(=O)C([H])([H])[H])c([H])c([H])c2O[C@]([H])(C([H])([H])[H])C([H])([H])C([H])([H])C([H])([H])C([H])([H])O[C@@]([H])(C([H])([H])N(C(=O)N([H])c2c([H])c([H])c3OC([H])([H])Oc3c2[H])C([H])([H])[H])[C@@]([H])(C([H])([H])[H])C1([H])[H])C([H])([H])[H]	0 (Inactive)	0	0	0
1066	PUBCHEM_CID_44483832	[H]OC([H])([H])[C@]([H])(N1C(=O)c2c([H])c(N([H])S(=O)(=O)c3sc([H])c([H])c3[H])c([H])c([H])c2O[C@]([H])(C([H])([H])[H])C([H])([H])C([H])([H])C([H])([H])C([H])([H])O[C@]([H])(C([H])([H])N([H])C([H])([H])[H])[C@@]([H])(C([H])([H])[H])C1([H])[H])C([H])([H])[H]	0 (Inactive)	0	0	0
1067	PUBCHEM_CID_44483833	[H]OC([H])([H])[C@]([H])(N1C(=O)C([H])([H])c2c([H])c(N([H])C(=O)N([H])c3c(noc3C([H])([H])[H])C([H])([H])[H])c([H])c([H])c2O[C@@]([H])(C([H])([H])N(C([H])([H])[H])C([H])([H])c2c([H])c([H])nc([H])c2[H])[C@@]([H])(C([H])([H])[H])C1([H])[H])C([H])([H])[H]	0 (Inactive)	0	0	0
1068	PUBCHEM_CID_44483834	[H]OC([H])([H])[C@]([H])(N1C(=O)C([H])([H])c2c([H])c(N([H])C(=O)N([H])c3c(noc3C([H])([H])[H])C([H])([H])[H])c([H])c([H])c2O[C@@]([H])(C([H])([H])N([H])C([H])([H])[H])[C@@]([H])(C([H])([H])[H])C1([H])[H])C([H])([H])[H]	0 (Inactive)	0	0	0
1069	PUBCHEM_CID_44483837	[H]OC([H])([H])[C@]([H])(N1C(=O)C([H])([H])c2c([H])c(N([H])C(=O)C([H])([H])c3c([H])c([H])c([H])c([H])c3[H])c([H])c([H])c2O[C@@]([H])(C([H])([H])N(C([H])([H])[H])C([H])([H])c2c([H])c([H])c(c([H])c2[H])C(F)(F)F)[C@@]([H])(C([H])([H])[H])C1([H])[H])C([H])([H])[H]	0 (Inactive)	0	0	0
1070	PUBCHEM_CID_44483839	[H]OC([H])([H])[C@]([H])(N1C(=O)C([H])([H])c2c([H])c(N([H])C(=O)C3([H])C([H])([H])C3([H])[H])c([H])c([H])c2O[C@@]([H])(C([H])([H])N(C([H])([H])[H])C([H])([H])c2c([H])c([H])nc([H])c2[H])[C@@]([H])(C([H])([H])[H])C1([H])[H])C([H])([H])[H]	0 (Inactive)	0	0	0
1071	PUBCHEM_CID_44483840	[H]OC([H])([H])[C@]([H])(N1C(=O)C([H])([H])c2c([H])c(N([H])C(=O)C([H])([H])c3c([H])n(c4c([H])c([H])c([H])c([H])c34)C([H])([H])[H])c([H])c([H])c2O[C@@]([H])(C([H])([H])N(C(=O)N([H])c2c([H])c([H])c([H])c([H])c2[H])C([H])([H])[H])[C@@]([H])(C([H])([H])[H])C1([H])[H])C([H])([H])[H]	0 (Inactive)	0	0	0
1072	PUBCHEM_CID_44483841	[H]OC([H])([H])[C@]([H])(N1C(=O)C([H])([H])c2c([H])c(N([H])C(=O)N([H])c3c(noc3C([H])([H])[H])C([H])([H])[H])c([H])c([H])c2O[C@@]([H])(C([H])([H])N(C([H])([H])[H])S(=O)(=O)c2c([H])c([H])c([H])c([H])c2[H])[C@@]([H])(C([H])([H])[H])C1([H])[H])C([H])([H])[H]	0 (Inactive)	0	0	0
1073	PUBCHEM_CID_44483842	[H]OC([H])([H])[C@]([H])(N1C(=O)C([H])([H])c2c([H])c(N([H])S(=O)(=O)c3nc([H])n(c3[H])C([H])([H])[H])c([H])c([H])c2O[C@@]([H])(C([H])([H])N(C([H])([H])[H])S(=O)(=O)c2c([H])c([H])c(OC([H])([H])[H])c([H])c2[H])[C@@]([H])(C([H])([H])[H])C1([H])[H])C([H])([H])[H]	0 (Inactive)	0	0	0
1074	PUBCHEM_CID_44202828	[H]OC([H])([H])[C@]([H])(N1C(=O)C([H])([H])c2c([H])c(N([H])C(=O)N([H])C3([H])C([H])([H])C([H])([H])C([H])([H])C([H])([H])C3([H])[H])c([H])c([H])c2O[C@@]([H])(C([H])([H])N(C([H])([H])[H])S(=O)(=O)c2c([H])c([H])c([H])c([H])c2[H])[C@@]([H])(C([H])([H])[H])C1([H])[H])C([H])([H])[H]	0 (Inactive)	0	0	0
1075	PUBCHEM_CID_44483845	[H]OC([H])([H])[C@@]([H])(N1C(=O)C([H])([H])c2c([H])c(N([H])C(=O)N([H])C([H])(C([H])([H])[H])C([H])([H])[H])c([H])c([H])c2O[C@]([H])(C([H])([H])N([H])C([H])([H])[H])[C@]([H])(C([H])([H])[H])C1([H])[H])C([H])([H])[H]	0 (Inactive)	0	0	0
1076	PUBCHEM_CID_44483846	[H]OC([H])([H])[C@@]([H])(N1C(=O)C([H])([H])c2c([H])c(N([H])S(=O)(=O)c3c([H])c([H])c(OC([H])([H])[H])c([H])c3[H])c([H])c([H])c2O[C@]([H])(C([H])([H])N(C([H])([H])[H])C([H])([H])[H])[C@]([H])(C([H])([H])[H])C1([H])[H])C([H])([H])[H]	0 (Inactive)	0	0	0
1077	PUBCHEM_CID_44483847	[H]OC([H])([H])[C@@]([H])(N1C(=O)C([H])([H])c2c([H])c(N([H])S(=O)(=O)c3sc([H])c([H])c3[H])c([H])c([H])c2O[C@]([H])(C([H])([H])N(C([H])([H])[H])C([H])([H])C2([H])C([H])([H])C2([H])[H])[C@]([H])(C([H])([H])[H])C1([H])[H])C([H])([H])[H]	0 (Inactive)	0	0	0
1078	PUBCHEM_CID_44483848	[H]OC([H])([H])[C@@]([H])(N1C(=O)C([H])([H])c2c([H])c(N([H])C(=O)C([H])([H])c3c([H])n(c4c([H])c([H])c([H])c([H])c34)C([H])([H])[H])c([H])c([H])c2O[C@]([H])(C([H])([H])N(C([H])([H])[H])C([H])([H])c2c([H])c([H])nc([H])c2[H])[C@]([H])(C([H])([H])[H])C1([H])[H])C([H])([H])[H]	0 (Inactive)	0	0	0
1079	PUBCHEM_CID_44483851	[H]OC([H])([H])[C@@]([H])(N1C(=O)C([H])([H])c2c([H])c(N([H])S(=O)(=O)c3nc([H])n(c3[H])C([H])([H])[H])c([H])c([H])c2O[C@]([H])(C([H])([H])N(C([H])([H])[H])S(=O)(=O)c2c(noc2C([H])([H])[H])C([H])([H])[H])[C@]([H])(C([H])([H])[H])C1([H])[H])C([H])([H])[H]	0 (Inactive)	0	0	0
1080	PUBCHEM_CID_44483853	[H]OC([H])([H])[C@@]([H])(N1C(=O)C([H])([H])c2c([H])c(N([H])C(=O)C3([H])C([H])([H])C3([H])[H])c([H])c([H])c2O[C@]([H])(C([H])([H])N(C([H])([H])[H])C([H])([H])c2c([H])c([H])c3OC([H])([H])Oc3c2[H])[C@]([H])(C([H])([H])[H])C1([H])[H])C([H])([H])[H]	0 (Inactive)	0	0	0
1081	PUBCHEM_CID_44483854	[H]OC([H])([H])[C@@]([H])(N1C(=O)C([H])([H])c2c([H])c(N([H])C(=O)C([H])([H])c3c([H])n(c4c([H])c([H])c([H])c([H])c34)C([H])([H])[H])c([H])c([H])c2O[C@]([H])(C([H])([H])N(C([H])([H])[H])S(=O)(=O)c2nc([H])n(c2[H])C([H])([H])[H])[C@]([H])(C([H])([H])[H])C1([H])[H])C([H])([H])[H]	0 (Inactive)	0	0	0
1082	PUBCHEM_CID_44483856	[H]OC(=O)c1c([H])c([H])c(c([H])c1[H])C([H])([H])N(C([H])([H])[H])C([H])([H])[C@@]1([H])Oc2c([H])c([H])c(N([H])C(=O)C([H])([H])c3c([H])n(c4c([H])c([H])c([H])c([H])c34)C([H])([H])[H])c([H])c2C([H])([H])C(=O)N(C([H])([H])[C@@]1([H])C([H])([H])[H])[C@@]([H])(C([H])([H])[H])C([H])([H])O[H]	0 (Inactive)	0	0	0
1083	PUBCHEM_CID_44483857	[H]OC([H])([H])[C@@]([H])(N1C(=O)C([H])([H])c2c([H])c(N([H])C(=O)C([H])([H])n3nnnc3[H])c([H])c([H])c2O[C@]([H])(C([H])([H])N(C([H])([H])[H])S(=O)(=O)c2c([H])c([H])c([H])c([H])c2[H])[C@]([H])(C([H])([H])[H])C1([H])[H])C([H])([H])[H]	0 (Inactive)	0	0	0
1084	PUBCHEM_CID_44483858	[H]OC([H])([H])[C@@]([H])(N1C(=O)C([H])([H])c2c([H])c(N([H])C(=O)N([H])c3c([H])c([H])c(F)c([H])c3[H])c([H])c([H])c2O[C@]([H])(C([H])([H])N(C(=O)N([H])C2([H])C([H])([H])C([H])([H])C([H])([H])C([H])([H])C2([H])[H])C([H])([H])[H])[C@]([H])(C([H])([H])[H])C1([H])[H])C([H])([H])[H]	0 (Inactive)	0	0	0
1085	PUBCHEM_CID_44483862	[H]OC([H])([H])[C@]([H])(N1C(=O)C([H])([H])c2c([H])c(N([H])C(=O)N([H])c3c([H])c([H])c(OC([H])([H])[H])c([H])c3[H])c([H])c([H])c2O[C@]([H])(C([H])([H])N(C([H])([H])[H])C([H])([H])[H])[C@]([H])(C([H])([H])[H])C1([H])[H])C([H])([H])[H]	0 (Inactive)	0	0	0
1086	PUBCHEM_CID_44483863	[H]OC([H])([H])[C@]([H])(N1C(=O)C([H])([H])c2c([H])c(N([H])C(=O)C3([H])C([H])([H])C3([H])[H])c([H])c([H])c2O[C@]([H])(C([H])([H])N(C([H])([H])[H])C([H])([H])[H])[C@]([H])(C([H])([H])[H])C1([H])[H])C([H])([H])[H]	0 (Inactive)	0	0	0
1087	PUBCHEM_CID_44483865	[H]OC([H])([H])[C@]([H])(N1C(=O)C([H])([H])c2c([H])c(N([H])S(=O)(=O)c3c([H])c([H])c([H])c([H])c3[H])c([H])c([H])c2O[C@]([H])(C([H])([H])N([H])C([H])([H])[H])[C@]([H])(C([H])([H])[H])C1([H])[H])C([H])([H])[H]	0 (Inactive)	0	0	0
1088	PUBCHEM_CID_44483869	[H]OC([H])([H])[C@]([H])(N1C(=O)C([H])([H])c2c([H])c(N([H])C(=O)N([H])C3([H])C([H])([H])C([H])([H])C([H])([H])C([H])([H])C3([H])[H])c([H])c([H])c2O[C@]([H])(C([H])([H])N(C([H])([H])[H])C([H])([H])[H])[C@]([H])(C([H])([H])[H])C1([H])[H])C([H])([H])[H]	0 (Inactive)	0	0	0
1089	PUBCHEM_CID_44483870	[H]OC([H])([H])[C@]([H])(N1C(=O)C([H])([H])c2c([H])c(N([H])C(=O)N([H])c3c(noc3C([H])([H])[H])C([H])([H])[H])c([H])c([H])c2O[C@]([H])(C([H])([H])N(C([H])([H])[H])C([H])([H])c2c([H])c([H])nc([H])c2[H])[C@]([H])(C([H])([H])[H])C1([H])[H])C([H])([H])[H]	0 (Inactive)	0	0	0
1090	PUBCHEM_CID_44483871	[H]OC([H])([H])[C@]([H])(N1C(=O)C([H])([H])c2c([H])c(N([H])C(=O)C3([H])C([H])([H])C3([H])[H])c([H])c([H])c2O[C@]([H])(C([H])([H])N([H])C([H])([H])[H])[C@]([H])(C([H])([H])[H])C1([H])[H])C([H])([H])[H]	0 (Inactive)	0	0	0
1091	PUBCHEM_CID_44483872	[H]OC([H])([H])[C@]([H])(N1C(=O)C([H])([H])c2c([H])c(N([H])C(=O)C3([H])C([H])([H])C([H])([H])C([H])([H])C([H])([H])C3([H])[H])c([H])c([H])c2O[C@]([H])(C([H])([H])N(C([H])([H])[H])S(=O)(=O)c2c(noc2C([H])([H])[H])C([H])([H])[H])[C@]([H])(C([H])([H])[H])C1([H])[H])C([H])([H])[H]	0 (Inactive)	0	0	0
1092	PUBCHEM_CID_44483873	[H]OC([H])([H])[C@]([H])(N1C(=O)C([H])([H])c2c([H])c(N([H])S(=O)(=O)C([H])([H])[H])c([H])c([H])c2O[C@]([H])(C([H])([H])N(C(=O)N([H])C2([H])C([H])([H])C([H])([H])C([H])([H])C([H])([H])C2([H])[H])C([H])([H])[H])[C@]([H])(C([H])([H])[H])C1([H])[H])C([H])([H])[H]	0 (Inactive)	0	0	0
1093	PUBCHEM_CID_44483876	[H]OC([H])([H])[C@]([H])(N1C(=O)C([H])([H])c2c([H])c(N([H])C(=O)C([H])([H])c3c([H])c([H])c([H])c([H])c3[H])c([H])c([H])c2O[C@]([H])(C([H])([H])N(C([H])([H])[H])C([H])([H])c2c([H])c([H])c(c([H])c2[H])C(F)(F)F)[C@]([H])(C([H])([H])[H])C1([H])[H])C([H])([H])[H]	0 (Inactive)	0	0	0
1094	PUBCHEM_CID_44483877	[H]OC([H])([H])[C@]([H])(N1C(=O)C([H])([H])c2c([H])c(N([H])C(=O)N([H])c3c([H])c([H])c([H])c([H])c3[H])c([H])c([H])c2O[C@]([H])(C([H])([H])N(C([H])([H])[H])C([H])([H])c2c([H])c([H])nc([H])c2[H])[C@]([H])(C([H])([H])[H])C1([H])[H])C([H])([H])[H]	0 (Inactive)	0	0	0
1095	PUBCHEM_CID_44483878	[H]OC([H])([H])[C@]([H])(N1C(=O)C([H])([H])c2c([H])c(N([H])C(=O)N([H])c3c([H])c([H])c(c([H])c3[H])C(F)(F)F)c([H])c([H])c2O[C@]([H])(C([H])([H])N(C(=O)N([H])C2([H])C([H])([H])C([H])([H])C([H])([H])C([H])([H])C2([H])[H])C([H])([H])[H])[C@]([H])(C([H])([H])[H])C1([H])[H])C([H])([H])[H]	0 (Inactive)	0	0	0
1096	PUBCHEM_CID_44483879	[H]OC([H])([H])[C@]([H])(N1C(=O)C([H])([H])c2c([H])c(N([H])C(=O)N([H])c3c([H])c([H])c(F)c([H])c3[H])c([H])c([H])c2O[C@]([H])(C([H])([H])N(C(=O)N([H])C2([H])C([H])([H])C([H])([H])C([H])([H])C([H])([H])C2([H])[H])C([H])([H])[H])[C@]([H])(C([H])([H])[H])C1([H])[H])C([H])([H])[H]	0 (Inactive)	0	0	0
1097	PUBCHEM_CID_44483881	[H]OC([H])([H])[C@]([H])(N1C(=O)C([H])([H])c2c([H])c(N([H])C(=O)C([H])([H])c3c([H])n(c4c([H])c([H])c([H])c([H])c34)C([H])([H])[H])c([H])c([H])c2O[C@]([H])(C([H])([H])N(C(=O)N([H])c2c([H])c([H])c([H])c([H])c2[H])C([H])([H])[H])[C@]([H])(C([H])([H])[H])C1([H])[H])C([H])([H])[H]	0 (Inactive)	0	0	0
1098	PUBCHEM_CID_44483882	[H]OC([H])([H])[C@]([H])(N1C(=O)C([H])([H])c2c([H])c(N([H])C(=O)c3c([H])c([H])nc([H])c3[H])c([H])c([H])c2O[C@]([H])(C([H])([H])N([H])C([H])([H])[H])[C@]([H])(C([H])([H])[H])C1([H])[H])C([H])([H])[H]	0 (Inactive)	0	0	0
1100	PUBCHEM_CID_44483884	[H]OC([H])([H])[C@]([H])(N1C(=O)C([H])([H])c2c([H])c(N([H])S(=O)(=O)c3sc([H])c([H])c3[H])c([H])c([H])c2O[C@]([H])(C([H])([H])N(C([H])([H])[H])S(=O)(=O)c2c([H])c([H])c([H])c([H])c2[H])[C@]([H])(C([H])([H])[H])C1([H])[H])C([H])([H])[H]	0 (Inactive)	0	0	0
1101	PUBCHEM_CID_44483886	[H]OC([H])([H])[C@]([H])(N1C(=O)C([H])([H])c2c([H])c(N([H])C(=O)C3([H])C([H])([H])C3([H])[H])c([H])c([H])c2O[C@]([H])(C([H])([H])N(C(=O)N([H])c2c(noc2C([H])([H])[H])C([H])([H])[H])C([H])([H])[H])[C@]([H])(C([H])([H])[H])C1([H])[H])C([H])([H])[H]	0 (Inactive)	0	0	0
1102	PUBCHEM_CID_44483887	[H]OC([H])([H])[C@]([H])(N1C(=O)C([H])([H])c2c([H])c(N([H])C(=O)C([H])([H])c3c([H])n(c4c([H])c([H])c([H])c([H])c34)C([H])([H])[H])c([H])c([H])c2O[C@]([H])(C([H])([H])N(C(=O)N([H])C2([H])C([H])([H])C([H])([H])C([H])([H])C([H])([H])C2([H])[H])C([H])([H])[H])[C@]([H])(C([H])([H])[H])C1([H])[H])C([H])([H])[H]	0 (Inactive)	0	0	0
1103	PUBCHEM_CID_44483888	[H]OC([H])([H])[C@]([H])(N1C(=O)C([H])([H])c2c([H])c(N([H])S(=O)(=O)C([H])([H])[H])c([H])c([H])c2O[C@]([H])(C([H])([H])N(C([H])([H])[H])S(=O)(=O)c2c([H])c([H])c(OC([H])([H])[H])c([H])c2[H])[C@]([H])(C([H])([H])[H])C1([H])[H])C([H])([H])[H]	0 (Inactive)	0	0	0
1104	PUBCHEM_CID_44483889	[H]OC([H])([H])[C@]([H])(N1C(=O)C([H])([H])c2c([H])c(c([H])c([H])c2O[C@]([H])(C([H])([H])N(C(=O)N([H])c2c([H])c([H])c([H])c3c([H])c([H])c([H])c([H])c23)C([H])([H])[H])[C@]([H])(C([H])([H])[H])C1([H])[H])N(C([H])([H])[H])C([H])([H])[H])C([H])([H])[H]	0 (Inactive)	0	0	0
1105	PUBCHEM_CID_44483891	[H]OC([H])([H])[C@]([H])(N1C(=O)C([H])([H])c2c([H])c(N([H])C(=O)C3([H])C([H])([H])C3([H])[H])c([H])c([H])c2O[C@]([H])(C([H])([H])N(C([H])([H])[H])S(=O)(=O)c2nc([H])n(c2[H])C([H])([H])[H])[C@]([H])(C([H])([H])[H])C1([H])[H])C([H])([H])[H]	0 (Inactive)	0	0	0
1106	PUBCHEM_CID_44483892	[H]OC([H])([H])[C@]([H])(N1C(=O)C([H])([H])c2c([H])c(N([H])C(=O)C([H])([H])c3c([H])c([H])c([H])c([H])c3[H])c([H])c([H])c2O[C@]([H])(C([H])([H])N(C([H])([H])[H])S(=O)(=O)c2nc([H])n(c2[H])C([H])([H])[H])[C@]([H])(C([H])([H])[H])C1([H])[H])C([H])([H])[H]	0 (Inactive)	0	0	0
1107	PUBCHEM_CID_44483893	[H]OC([H])([H])[C@]([H])(N1C(=O)C([H])([H])c2c([H])c(N([H])C(=O)C([H])([H])c3c([H])c([H])c([H])c([H])c3[H])c([H])c([H])c2O[C@]([H])(C([H])([H])N(C(=O)N([H])c2c([H])c([H])c3OC([H])([H])Oc3c2[H])C([H])([H])[H])[C@]([H])(C([H])([H])[H])C1([H])[H])C([H])([H])[H]	0 (Inactive)	0	0	0
1108	PUBCHEM_CID_44483896	[H]OC([H])([H])[C@]([H])(N1C(=O)C([H])([H])c2c([H])c(N([H])S(=O)(=O)c3c([H])c([H])c([H])c([H])c3[H])c([H])c([H])c2O[C@]([H])(C([H])([H])N(C([H])([H])[H])S(=O)(=O)c2c([H])c([H])c(F)c([H])c2[H])[C@]([H])(C([H])([H])[H])C1([H])[H])C([H])([H])[H]	0 (Inactive)	0	0	0
1109	PUBCHEM_CID_44483897	[H]OC([H])([H])[C@]([H])(N1C(=O)C([H])([H])c2c([H])c(N([H])C(=O)C([H])([H])c3c([H])n(c4c([H])c([H])c([H])c([H])c34)C([H])([H])[H])c([H])c([H])c2O[C@]([H])(C([H])([H])N(C([H])([H])[H])S(=O)(=O)c2sc([H])c([H])c2[H])[C@]([H])(C([H])([H])[H])C1([H])[H])C([H])([H])[H]	0 (Inactive)	0	0	0
1110	PUBCHEM_CID_44483898	[H]OC([H])([H])[C@]([H])(N1C(=O)C([H])([H])c2c([H])c(N([H])C(=O)N([H])c3c(noc3C([H])([H])[H])C([H])([H])[H])c([H])c([H])c2O[C@]([H])(C([H])([H])N(C([H])([H])[H])S(=O)(=O)c2c([H])c([H])c([H])c([H])c2[H])[C@]([H])(C([H])([H])[H])C1([H])[H])C([H])([H])[H]	0 (Inactive)	0	0	0
1111	PUBCHEM_CID_44483899	[H]OC([H])([H])[C@]([H])(N1C(=O)C([H])([H])c2c([H])c(N([H])S(=O)(=O)c3c(noc3C([H])([H])[H])C([H])([H])[H])c([H])c([H])c2O[C@]([H])(C([H])([H])N(C(=O)N([H])c2c([H])c([H])c(F)c([H])c2[H])C([H])([H])[H])[C@]([H])(C([H])([H])[H])C1([H])[H])C([H])([H])[H]	0 (Inactive)	0	0	0
1112	PUBCHEM_CID_44483900	[H]OC([H])([H])[C@]([H])(N1C(=O)C([H])([H])c2c([H])c(N([H])S(=O)(=O)c3nc([H])n(c3[H])C([H])([H])[H])c([H])c([H])c2O[C@]([H])(C([H])([H])N(C([H])([H])[H])S(=O)(=O)c2c([H])c([H])c(OC([H])([H])[H])c([H])c2[H])[C@]([H])(C([H])([H])[H])C1([H])[H])C([H])([H])[H]	0 (Inactive)	0	0	0
1113	PUBCHEM_CID_44483901	[H]OC([H])([H])[C@]([H])(N1C(=O)C([H])([H])c2c([H])c(N([H])C(=O)C3([H])C([H])([H])C3([H])[H])c([H])c([H])c2O[C@]([H])(C([H])([H])N(C(=O)N([H])C([H])(C([H])([H])[H])C([H])([H])[H])C([H])([H])[H])[C@]([H])(C([H])([H])[H])C1([H])[H])C([H])([H])[H]	0 (Inactive)	0	0	0
1114	PUBCHEM_CID_44483902	[H]OC([H])([H])[C@]([H])(N1C(=O)C([H])([H])c2c([H])c(N([H])C(=O)C3([H])C([H])([H])C3([H])[H])c([H])c([H])c2O[C@]([H])(C([H])([H])N(C([H])([H])[H])S(=O)(=O)c2sc([H])c([H])c2[H])[C@]([H])(C([H])([H])[H])C1([H])[H])C([H])([H])[H]	0 (Inactive)	0	0	0
1116	PUBCHEM_CID_44483986	[H]OC([H])([H])[C@]([H])(N1C(=O)c2c([H])c(N([H])C(=O)C([H])([H])c3c([H])c([H])c([H])c([H])c3[H])c([H])c([H])c2O[C@]([H])(C([H])([H])N(C([H])([H])[H])C([H])([H])c2c([H])c([H])c(c([H])c2[H])-c2c([H])c([H])c([H])c([H])c2[H])[C@@]([H])(C([H])([H])[H])C1([H])[H])C([H])([H])[H]	0 (Inactive)	0	0	0
1117	PUBCHEM_CID_44483987	[H]OC([H])([H])[C@]([H])(N1C(=O)c2c([H])c(N([H])S(=O)(=O)c3c([H])c([H])c([H])c([H])c3[H])c([H])c([H])c2O[C@]([H])(C([H])([H])N(C([H])([H])[H])C([H])([H])c2c([H])c([H])c([H])c([H])c2[H])[C@@]([H])(C([H])([H])[H])C1([H])[H])C([H])([H])[H]	0 (Inactive)	0	0	0
1118	PUBCHEM_CID_44483988	[H]OC([H])([H])[C@]([H])(N1C(=O)c2c([H])c(N([H])C(=O)C([H])([H])C([H])([H])C([H])([H])N(C([H])([H])[H])C([H])([H])[H])c([H])c([H])c2O[C@]([H])(C([H])([H])N(C(=O)N([H])c2c([H])c([H])c(OC([H])([H])[H])c([H])c2[H])C([H])([H])[H])[C@@]([H])(C([H])([H])[H])C1([H])[H])C([H])([H])[H]	0 (Inactive)	0	0	0
1119	PUBCHEM_CID_44483989	[H]OC([H])([H])[C@]([H])(N1C(=O)c2c([H])c(N([H])C(=O)C([H])([H])C([H])([H])C([H])([H])N(C([H])([H])[H])C([H])([H])[H])c([H])c([H])c2O[C@]([H])(C([H])([H])N(C([H])([H])[H])S(=O)(=O)c2c([H])c([H])c(F)c([H])c2[H])[C@@]([H])(C([H])([H])[H])C1([H])[H])C([H])([H])[H]	0 (Inactive)	0	0	0
1120	PUBCHEM_CID_44483990	[H]OC([H])([H])[C@]([H])(N1C(=O)c2c([H])c(N([H])C(=O)C([H])([H])C([H])([H])C([H])([H])N(C([H])([H])[H])C([H])([H])[H])c([H])c([H])c2O[C@]([H])(C([H])([H])N(C([H])([H])[H])S(=O)(=O)c2c([H])c([H])c(Cl)c([H])c2[H])[C@@]([H])(C([H])([H])[H])C1([H])[H])C([H])([H])[H]	0 (Inactive)	0	0	0
1121	PUBCHEM_CID_44483991	[H]OC([H])([H])[C@]([H])(N1C(=O)c2c([H])c(c([H])c([H])c2O[C@]([H])(C([H])([H])N(C(=O)N([H])c2c(noc2C([H])([H])[H])C([H])([H])[H])C([H])([H])[H])[C@@]([H])(C([H])([H])[H])C1([H])[H])N(C([H])([H])[H])C([H])([H])[H])C([H])([H])[H]	0 (Inactive)	0	0	0
1122	PUBCHEM_CID_44483992	[H]OC([H])([H])[C@]([H])(N1C(=O)c2c([H])c(N([H])S(=O)(=O)c3sc([H])c([H])c3[H])c([H])c([H])c2O[C@]([H])(C([H])([H])N(C([H])([H])[H])C([H])([H])c2c([H])c([H])c(Cl)c(Cl)c2[H])[C@@]([H])(C([H])([H])[H])C1([H])[H])C([H])([H])[H]	0 (Inactive)	0	0	0
1123	PUBCHEM_CID_44202318	[H]OC([H])([H])[C@]([H])(N1C(=O)c2c([H])c(N([H])C(=O)C([H])([H])n3nnnc3[H])c([H])c([H])c2O[C@]([H])(C([H])([H])N(C([H])([H])[H])C([H])([H])c2c([H])c([H])c3OC([H])([H])Oc3c2[H])[C@@]([H])(C([H])([H])[H])C1([H])[H])C([H])([H])[H]	0 (Inactive)	0	0	0
1124	PUBCHEM_CID_44202306	[H]OC([H])([H])[C@]([H])(N1C(=O)c2c([H])c(N([H])C(=O)C([H])([H])C([H])([H])N3C([H])([H])C([H])([H])OC([H])([H])C3([H])[H])c([H])c([H])c2O[C@]([H])(C([H])([H])N(C(=O)N([H])c2c([H])c([H])c([H])c([H])c2[H])C([H])([H])[H])[C@@]([H])(C([H])([H])[H])C1([H])[H])C([H])([H])[H]	0 (Inactive)	0	0	0
1125	PUBCHEM_CID_44483993	[H]OC([H])([H])[C@]([H])(N1C(=O)c2c([H])c(N([H])C(=O)c3c([H])c([H])nc([H])c3[H])c([H])c([H])c2O[C@]([H])(C([H])([H])N(C([H])([H])[H])C([H])([H])c2c([H])c([H])c(c([H])c2[H])-c2c([H])c([H])c([H])c([H])c2[H])[C@@]([H])(C([H])([H])[H])C1([H])[H])C([H])([H])[H]	0 (Inactive)	0	0	0
1126	PUBCHEM_CID_44483994	[H]OC([H])([H])[C@]([H])(N1C(=O)c2c([H])c(N([H])C(=O)C3([H])C([H])([H])C([H])([H])C([H])([H])C([H])([H])C3([H])[H])c([H])c([H])c2O[C@]([H])(C([H])([H])N(C([H])([H])[H])S(=O)(=O)c2c([H])c([H])c(Cl)c([H])c2[H])[C@@]([H])(C([H])([H])[H])C1([H])[H])C([H])([H])[H]	0 (Inactive)	0	0	0
1127	PUBCHEM_CID_44483995	[H]OC([H])([H])[C@]([H])(N1C(=O)c2c([H])c(N([H])C(=O)C([H])([H])C([H])([H])N3C([H])([H])C([H])([H])OC([H])([H])C3([H])[H])c([H])c([H])c2O[C@]([H])(C([H])([H])N(C(=O)N([H])c2c([H])c([H])c([H])c3c([H])c([H])c([H])c([H])c23)C([H])([H])[H])[C@@]([H])(C([H])([H])[H])C1([H])[H])C([H])([H])[H]	0 (Inactive)	0	0	0
1128	PUBCHEM_CID_44483996	[H]OC([H])([H])[C@]([H])(N1C(=O)c2c([H])c(N([H])C(=O)C([H])([H])c3c([H])c([H])c([H])c([H])c3[H])c([H])c([H])c2O[C@]([H])(C([H])([H])N(C([H])([H])[H])C([H])([H])c2c([H])c([H])c(Cl)c(Cl)c2[H])[C@@]([H])(C([H])([H])[H])C1([H])[H])C([H])([H])[H]	0 (Inactive)	0	0	0
1129	PUBCHEM_CID_44483997	[H]OC([H])([H])[C@]([H])(N1C(=O)c2c([H])c(N([H])S(=O)(=O)c3sc([H])c([H])c3[H])c([H])c([H])c2O[C@]([H])(C([H])([H])N(C(=O)N([H])c2c([H])c([H])c([H])c3c([H])c([H])c([H])c([H])c23)C([H])([H])[H])[C@@]([H])(C([H])([H])[H])C1([H])[H])C([H])([H])[H]	0 (Inactive)	0	0	0
1130	PUBCHEM_CID_44483998	[H]OC([H])([H])[C@]([H])(N1C(=O)c2c([H])c(N([H])S(=O)(=O)c3c([H])c([H])c([H])c([H])c3[H])c([H])c([H])c2O[C@]([H])(C([H])([H])N(C([H])([H])[H])C([H])([H])c2c([H])c([H])c(c([H])c2[H])-c2c([H])c([H])c([H])c([H])c2[H])[C@@]([H])(C([H])([H])[H])C1([H])[H])C([H])([H])[H]	0 (Inactive)	0	0	0
1131	PUBCHEM_CID_44483999	[H]OC([H])([H])[C@]([H])(N1C(=O)c2c([H])c(N([H])C(=O)c3c([H])c([H])nc([H])c3[H])c([H])c([H])c2O[C@]([H])(C([H])([H])N(C([H])([H])[H])C([H])([H])c2c([H])c([H])c3OC([H])([H])Oc3c2[H])[C@@]([H])(C([H])([H])[H])C1([H])[H])C([H])([H])[H]	0 (Inactive)	0	0	0
1133	PUBCHEM_CID_44484001	[H]OC([H])([H])[C@]([H])(N1C(=O)c2c([H])c(N([H])C(=O)N([H])c3c([H])c([H])c(OC([H])([H])[H])c([H])c3[H])c([H])c([H])c2O[C@]([H])(C([H])([H])N(C([H])([H])[H])C([H])([H])c2c([H])c([H])c([H])c([H])c2[H])[C@@]([H])(C([H])([H])[H])C1([H])[H])C([H])([H])[H]	0 (Inactive)	0	0	0
1134	PUBCHEM_CID_44484002	[H]OC([H])([H])[C@]([H])(N1C(=O)c2c([H])c(N([H])C(=O)C3([H])C([H])([H])C([H])([H])C([H])([H])C([H])([H])C3([H])[H])c([H])c([H])c2O[C@]([H])(C([H])([H])N(C([H])([H])[H])C([H])([H])c2c([H])c([H])c(c([H])c2[H])-c2c([H])c([H])c([H])c([H])c2[H])[C@@]([H])(C([H])([H])[H])C1([H])[H])C([H])([H])[H]	0 (Inactive)	0	0	0
1135	PUBCHEM_CID_44484003	[H]OC([H])([H])[C@]([H])(N1C(=O)c2c([H])c(N([H])S(=O)(=O)C([H])([H])[H])c([H])c([H])c2O[C@]([H])(C([H])([H])N(C([H])([H])[H])C([H])([H])c2c([H])c([H])c(c([H])c2[H])-c2c([H])c([H])c([H])c([H])c2[H])[C@@]([H])(C([H])([H])[H])C1([H])[H])C([H])([H])[H]	0 (Inactive)	0	0	0
1136	PUBCHEM_CID_44484004	[H]OC([H])([H])[C@]([H])(N1C(=O)c2c([H])c(N([H])C(=O)N([H])c3c([H])c([H])c([H])c([H])c3[H])c([H])c([H])c2O[C@]([H])(C([H])([H])N(C([H])([H])[H])C([H])([H])c2c([H])c([H])c([H])c([H])c2[H])[C@@]([H])(C([H])([H])[H])C1([H])[H])C([H])([H])[H]	0 (Inactive)	0	0	0
1137	PUBCHEM_CID_44484005	[H]OC([H])([H])[C@]([H])(N1C(=O)c2c([H])c(N([H])C(=O)c3c([H])c([H])nc([H])c3[H])c([H])c([H])c2O[C@]([H])(C([H])([H])N(C([H])([H])[H])C([H])([H])c2c([H])c([H])c(Cl)c(Cl)c2[H])[C@@]([H])(C([H])([H])[H])C1([H])[H])C([H])([H])[H]	0 (Inactive)	0	0	0
1138	PUBCHEM_CID_44202412	[H]OC([H])([H])[C@]([H])(N1C(=O)c2c([H])c(N([H])S(=O)(=O)c3c(noc3C([H])([H])[H])C([H])([H])[H])c([H])c([H])c2O[C@]([H])(C([H])([H])N(C([H])([H])[H])S(=O)(=O)c2c([H])c([H])c([H])c([H])c2[H])[C@@]([H])(C([H])([H])[H])C1([H])[H])C([H])([H])[H]	0 (Inactive)	0	0	0
1139	PUBCHEM_CID_44484006	[H]OC([H])([H])[C@]([H])(N1C(=O)c2c([H])c(N([H])C(=O)c3c([H])c([H])nc([H])c3[H])c([H])c([H])c2O[C@]([H])(C([H])([H])N(C(=O)N([H])c2c([H])c([H])c([H])c3c([H])c([H])c([H])c([H])c23)C([H])([H])[H])[C@@]([H])(C([H])([H])[H])C1([H])[H])C([H])([H])[H]	0 (Inactive)	0	0	0
1140	PUBCHEM_CID_44484007	[H]OC([H])([H])[C@]([H])(N1C(=O)c2c([H])c(N([H])C(=O)N([H])c3c(noc3C([H])([H])[H])C([H])([H])[H])c([H])c([H])c2O[C@]([H])(C([H])([H])N(C([H])([H])[H])C([H])([H])c2c([H])c([H])c([H])c([H])c2[H])[C@@]([H])(C([H])([H])[H])C1([H])[H])C([H])([H])[H]	0 (Inactive)	0	0	0
1141	PUBCHEM_CID_44484008	[H]OC([H])([H])[C@]([H])(N1C(=O)c2c([H])c(N([H])C(=O)C([H])([H])C([H])([H])C(F)(F)F)c([H])c([H])c2O[C@]([H])(C([H])([H])N(C([H])([H])[H])C([H])([H])c2c([H])c([H])c(c([H])c2[H])-c2c([H])c([H])c([H])c([H])c2[H])[C@@]([H])(C([H])([H])[H])C1([H])[H])C([H])([H])[H]	0 (Inactive)	0	0	0
1142	PUBCHEM_CID_44484009	[H]OC([H])([H])[C@]([H])(N1C(=O)c2c([H])c(N([H])S(=O)(=O)c3c(noc3C([H])([H])[H])C([H])([H])[H])c([H])c([H])c2O[C@]([H])(C([H])([H])N(C([H])([H])[H])S(=O)(=O)c2c([H])c([H])c(Cl)c([H])c2[H])[C@@]([H])(C([H])([H])[H])C1([H])[H])C([H])([H])[H]	0 (Inactive)	0	0	0
1143	PUBCHEM_CID_44202607	[H]OC([H])([H])[C@]([H])(N1C(=O)c2c([H])c(N([H])C(=O)C3([H])C([H])([H])C([H])([H])C([H])([H])C([H])([H])C3([H])[H])c([H])c([H])c2O[C@]([H])(C([H])([H])N(C(=O)N([H])c2c([H])c([H])c3OC([H])([H])Oc3c2[H])C([H])([H])[H])[C@@]([H])(C([H])([H])[H])C1([H])[H])C([H])([H])[H]	0 (Inactive)	0	0	0
1144	PUBCHEM_CID_44484010	[H]OC([H])([H])[C@]([H])(N1C(=O)c2c([H])c(N([H])C(=O)C([H])([H])C([H])([H])N3C([H])([H])C([H])([H])OC([H])([H])C3([H])[H])c([H])c([H])c2O[C@@]([H])(C([H])([H])N(C([H])([H])[H])C([H])([H])c2c([H])c([H])c(c([H])c2[H])-c2c([H])c([H])c([H])c([H])c2[H])[C@]([H])(C([H])([H])[H])C1([H])[H])C([H])([H])[H]	0 (Inactive)	0	0	0
1145	PUBCHEM_CID_44484011	[H]OC([H])([H])[C@]([H])(N1C(=O)c2c([H])c(N([H])C(=O)C([H])([H])C([H])([H])N3C([H])([H])C([H])([H])OC([H])([H])C3([H])[H])c([H])c([H])c2O[C@@]([H])(C([H])([H])N(C(=O)N([H])c2c([H])c([H])c([H])c3c([H])c([H])c([H])c([H])c23)C([H])([H])[H])[C@]([H])(C([H])([H])[H])C1([H])[H])C([H])([H])[H]	0 (Inactive)	0	0	0
1146	PUBCHEM_CID_44484012	[H]OC([H])([H])[C@]([H])(N1C(=O)c2c([H])c(N([H])S(=O)(=O)c3sc([H])c([H])c3[H])c([H])c([H])c2O[C@@]([H])(C([H])([H])N(C([H])([H])[H])S(=O)(=O)c2c([H])c([H])c(Cl)c([H])c2[H])[C@]([H])(C([H])([H])[H])C1([H])[H])C([H])([H])[H]	0 (Inactive)	0	0	0
1147	PUBCHEM_CID_44484013	[H]OC([H])([H])[C@]([H])(N1C(=O)c2c([H])c(N([H])C(=O)N([H])c3c([H])c([H])c4OC([H])([H])Oc4c3[H])c([H])c([H])c2O[C@@]([H])(C([H])([H])N(C([H])([H])[H])C([H])([H])c2c([H])c([H])c(c([H])c2[H])C(F)(F)F)[C@]([H])(C([H])([H])[H])C1([H])[H])C([H])([H])[H]	0 (Inactive)	0	0	0
1148	PUBCHEM_CID_44484014	[H]OC([H])([H])[C@]([H])(N1C(=O)c2c([H])c(N([H])S(=O)(=O)c3c(noc3C([H])([H])[H])C([H])([H])[H])c([H])c([H])c2O[C@@]([H])(C([H])([H])N(C([H])([H])[H])S(=O)(=O)c2c([H])c([H])c([H])c([H])c2[H])[C@]([H])(C([H])([H])[H])C1([H])[H])C([H])([H])[H]	0 (Inactive)	0	0	0
1149	PUBCHEM_CID_44484015	[H]OC([H])([H])[C@]([H])(N1C(=O)c2c([H])c(N([H])S(=O)(=O)c3c(noc3C([H])([H])[H])C([H])([H])[H])c([H])c([H])c2O[C@@]([H])(C([H])([H])N(C([H])([H])[H])S(=O)(=O)c2c([H])c([H])c(c([H])c2[H])C([H])([H])[H])[C@]([H])(C([H])([H])[H])C1([H])[H])C([H])([H])[H]	0 (Inactive)	0	0	0
1150	PUBCHEM_CID_44484016	[H]OC([H])([H])[C@]([H])(N1C(=O)c2c([H])c(N([H])C(=O)N([H])c3c([H])c([H])c(c([H])c3[H])C(F)(F)F)c([H])c([H])c2O[C@@]([H])(C([H])([H])N(C(=O)N([H])c2c([H])c([H])c3OC([H])([H])Oc3c2[H])C([H])([H])[H])[C@]([H])(C([H])([H])[H])C1([H])[H])C([H])([H])[H]	0 (Inactive)	0	0	0
1151	PUBCHEM_CID_44484017	[H]OC([H])([H])[C@]([H])(N1C(=O)c2c([H])c(N([H])C(=O)N([H])c3c(noc3C([H])([H])[H])C([H])([H])[H])c([H])c([H])c2O[C@@]([H])(C([H])([H])N(C(=O)N([H])c2c([H])c([H])c([H])c3c([H])c([H])c([H])c([H])c23)C([H])([H])[H])[C@]([H])(C([H])([H])[H])C1([H])[H])C([H])([H])[H]	0 (Inactive)	0	0	0
1152	PUBCHEM_CID_44484018	[H]OC([H])([H])[C@]([H])(N1C(=O)c2c([H])c(N([H])C(=O)C([H])([H])c3c([H])n(c4c([H])c([H])c([H])c([H])c34)C([H])([H])[H])c([H])c([H])c2O[C@@]([H])(C([H])([H])N(C([H])([H])[H])C([H])([H])c2c([H])c([H])nc([H])c2[H])[C@]([H])(C([H])([H])[H])C1([H])[H])C([H])([H])[H]	0 (Inactive)	0	0	0
1153	PUBCHEM_CID_44484019	[H]OC([H])([H])[C@]([H])(N1C(=O)c2c([H])c(N([H])C(=O)N([H])c3c([H])c([H])c4OC([H])([H])Oc4c3[H])c([H])c([H])c2O[C@@]([H])(C([H])([H])N(C([H])([H])[H])S(=O)(=O)c2c([H])c([H])c(c([H])c2[H])C([H])([H])[H])[C@]([H])(C([H])([H])[H])C1([H])[H])C([H])([H])[H]	0 (Inactive)	0	0	0
1154	PUBCHEM_CID_44484020	[H]OC([H])([H])[C@]([H])(N1C(=O)c2c([H])c(N([H])S(=O)(=O)c3sc([H])c([H])c3[H])c([H])c([H])c2O[C@@]([H])(C([H])([H])N(C([H])([H])[H])S(=O)(=O)c2c([H])c([H])c(F)c([H])c2[H])[C@]([H])(C([H])([H])[H])C1([H])[H])C([H])([H])[H]	0 (Inactive)	0	0	0
1155	PUBCHEM_CID_44484021	[H]OC([H])([H])[C@]([H])(N1C(=O)c2c([H])c(N([H])S(=O)(=O)c3c([H])c([H])c(Cl)c([H])c3[H])c([H])c([H])c2O[C@@]([H])(C([H])([H])N(C([H])([H])[H])C([H])([H])c2c([H])c([H])c3OC([H])([H])Oc3c2[H])[C@]([H])(C([H])([H])[H])C1([H])[H])C([H])([H])[H]	0 (Inactive)	0	0	0
1156	PUBCHEM_CID_44484022	[H]OC([H])([H])[C@]([H])(N1C(=O)c2c([H])c(N([H])S(=O)(=O)c3c(noc3C([H])([H])[H])C([H])([H])[H])c([H])c([H])c2O[C@@]([H])(C([H])([H])N(C(=O)N([H])c2c([H])c([H])c(F)c([H])c2[H])C([H])([H])[H])[C@]([H])(C([H])([H])[H])C1([H])[H])C([H])([H])[H]	0 (Inactive)	0	0	0
1157	PUBCHEM_CID_44484023	[H]OC([H])([H])[C@]([H])(N1C(=O)c2c([H])c(N([H])C(=O)C3([H])C([H])([H])C([H])([H])C([H])([H])C([H])([H])C3([H])[H])c([H])c([H])c2O[C@@]([H])(C([H])([H])N(C([H])([H])[H])S(=O)(=O)c2c([H])c([H])c(Cl)c([H])c2[H])[C@]([H])(C([H])([H])[H])C1([H])[H])C([H])([H])[H]	0 (Inactive)	0	0	0
1158	PUBCHEM_CID_44484024	[H]OC([H])([H])[C@]([H])(N1C(=O)c2c([H])c(N([H])S(=O)(=O)c3c(noc3C([H])([H])[H])C([H])([H])[H])c([H])c([H])c2O[C@@]([H])(C([H])([H])N(C([H])([H])[H])S(=O)(=O)c2nc([H])n(c2[H])C([H])([H])[H])[C@]([H])(C([H])([H])[H])C1([H])[H])C([H])([H])[H]	0 (Inactive)	0	0	0
1159	PUBCHEM_CID_44484025	[H]OC([H])([H])[C@]([H])(N1C(=O)c2c([H])c(N([H])S(=O)(=O)c3c(noc3C([H])([H])[H])C([H])([H])[H])c([H])c([H])c2O[C@@]([H])(C([H])([H])N(C([H])([H])[H])S(=O)(=O)c2c([H])c([H])c(OC([H])([H])[H])c([H])c2[H])[C@]([H])(C([H])([H])[H])C1([H])[H])C([H])([H])[H]	0 (Inactive)	0	0	0
1160	PUBCHEM_CID_44484026	[H]OC([H])([H])[C@]([H])(N1C(=O)c2c([H])c(N([H])C(=O)C([H])([H])c3c([H])n(c4c([H])c([H])c([H])c([H])c34)C([H])([H])[H])c([H])c([H])c2O[C@@]([H])(C([H])([H])N(C([H])([H])[H])C([H])([H])c2c([H])c([H])c(Oc3c([H])c([H])c([H])c([H])c3[H])c([H])c2[H])[C@]([H])(C([H])([H])[H])C1([H])[H])C([H])([H])[H]	0 (Inactive)	0	0	0
1161	PUBCHEM_CID_44484027	[H]OC([H])([H])[C@]([H])(N1C(=O)c2c([H])c(N([H])C(=O)C([H])([H])C([H])([H])N3C([H])([H])C([H])([H])OC([H])([H])C3([H])[H])c([H])c([H])c2O[C@@]([H])(C([H])([H])N(C(=O)N([H])c2c([H])c([H])c3OC([H])([H])Oc3c2[H])C([H])([H])[H])[C@]([H])(C([H])([H])[H])C1([H])[H])C([H])([H])[H]	0 (Inactive)	0	0	0
1162	PUBCHEM_CID_44484028	[H]OC([H])([H])[C@]([H])(N1C(=O)c2c([H])c(c([H])c([H])c2O[C@@]([H])(C([H])([H])N(C([H])([H])[H])S(=O)(=O)c2c([H])c([H])c(c([H])c2[H])C([H])([H])[H])[C@]([H])(C([H])([H])[H])C1([H])[H])N(C([H])([H])[H])C([H])([H])[H])C([H])([H])[H]	0 (Inactive)	0	0	0
1163	PUBCHEM_CID_44484029	[H]OC([H])([H])[C@]([H])(N1C(=O)c2c([H])c(N([H])S(=O)(=O)c3c(noc3C([H])([H])[H])C([H])([H])[H])c([H])c([H])c2O[C@@]([H])(C([H])([H])N(C([H])([H])[H])C([H])([H])C2([H])C([H])([H])C([H])([H])C([H])([H])C([H])([H])C2([H])[H])[C@]([H])(C([H])([H])[H])C1([H])[H])C([H])([H])[H]	0 (Inactive)	0	0	0
1164	PUBCHEM_CID_44484030	[H]OC([H])([H])[C@]([H])(N1C(=O)c2c([H])c(N([H])C(=O)N([H])c3c([H])c([H])c([H])c4c([H])c([H])c([H])c([H])c34)c([H])c([H])c2O[C@@]([H])(C([H])([H])N(C([H])([H])[H])C([H])([H])[H])[C@]([H])(C([H])([H])[H])C1([H])[H])C([H])([H])[H]	0 (Inactive)	0	0	0
1165	PUBCHEM_CID_44484031	[H]OC([H])([H])[C@]([H])(N1C(=O)c2c([H])c(N([H])S(=O)(=O)c3c(noc3C([H])([H])[H])C([H])([H])[H])c([H])c([H])c2O[C@@]([H])(C([H])([H])N(C(=O)N([H])c2c([H])c([H])c(OC([H])([H])[H])c([H])c2[H])C([H])([H])[H])[C@]([H])(C([H])([H])[H])C1([H])[H])C([H])([H])[H]	0 (Inactive)	0	0	0
1166	PUBCHEM_CID_44484032	[H]OC([H])([H])[C@]([H])(N1C(=O)c2c([H])c(N([H])C(=O)C([H])([H])C([H])([H])C(F)(F)F)c([H])c([H])c2O[C@@]([H])(C([H])([H])N(C([H])([H])[H])S(=O)(=O)c2sc([H])c([H])c2[H])[C@]([H])(C([H])([H])[H])C1([H])[H])C([H])([H])[H]	0 (Inactive)	0	0	0
1167	PUBCHEM_CID_44484033	[H]OC([H])([H])[C@]([H])(N1C(=O)c2c([H])c(N([H])S(=O)(=O)c3c(noc3C([H])([H])[H])C([H])([H])[H])c([H])c([H])c2O[C@@]([H])(C([H])([H])N(C(=O)N([H])C([H])(C([H])([H])[H])C([H])([H])[H])C([H])([H])[H])[C@]([H])(C([H])([H])[H])C1([H])[H])C([H])([H])[H]	0 (Inactive)	0	0	0
1168	PUBCHEM_CID_44484034	[H]OC([H])([H])[C@]([H])(N1C(=O)c2c([H])c(N([H])C(=O)C([H])([H])C([H])([H])C([H])([H])N(C([H])([H])[H])C([H])([H])[H])c([H])c([H])c2O[C@@]([H])(C([H])([H])N(C([H])([H])[H])C([H])([H])c2c([H])c([H])c(Oc3c([H])c([H])c([H])c([H])c3[H])c([H])c2[H])[C@]([H])(C([H])([H])[H])C1([H])[H])C([H])([H])[H]	0 (Inactive)	0	0	0
1169	PUBCHEM_CID_44484035	[H]OC([H])([H])[C@]([H])(N1C(=O)c2c([H])c(N([H])S(=O)(=O)C([H])([H])[H])c([H])c([H])c2O[C@@]([H])(C([H])([H])N(C([H])([H])[H])S(=O)(=O)c2c([H])c([H])c(c([H])c2[H])C([H])([H])[H])[C@]([H])(C([H])([H])[H])C1([H])[H])C([H])([H])[H]	0 (Inactive)	0	0	0
1170	PUBCHEM_CID_44484036	[H]OC([H])([H])[C@]([H])(N1C(=O)c2c([H])c(N([H])C(=O)c3c([H])c([H])nc([H])c3[H])c([H])c([H])c2O[C@@]([H])(C([H])([H])N(C([H])([H])[H])S(=O)(=O)c2sc([H])c([H])c2[H])[C@]([H])(C([H])([H])[H])C1([H])[H])C([H])([H])[H]	0 (Inactive)	0	0	0
1171	PUBCHEM_CID_44484037	[H]OC([H])([H])[C@]([H])(N1C(=O)c2c([H])c(N([H])C(=O)N([H])c3c([H])c([H])c(c([H])c3[H])C(F)(F)F)c([H])c([H])c2O[C@@]([H])(C([H])([H])N(C([H])([H])[H])C([H])([H])c2c([H])c([H])c(OC([H])([H])[H])c([H])c2[H])[C@]([H])(C([H])([H])[H])C1([H])[H])C([H])([H])[H]	0 (Inactive)	0	0	0
1172	PUBCHEM_CID_44484038	[H]OC([H])([H])[C@]([H])(N1C(=O)c2c([H])c(N([H])C(=O)N([H])c3c([H])c([H])c([H])c([H])c3[H])c([H])c([H])c2O[C@@]([H])(C([H])([H])N(C([H])([H])[H])S(=O)(=O)c2sc([H])c([H])c2[H])[C@]([H])(C([H])([H])[H])C1([H])[H])C([H])([H])[H]	0 (Inactive)	0	0	0
1173	PUBCHEM_CID_44484039	[H]OC([H])([H])[C@]([H])(N1C(=O)c2c([H])c(N([H])S(=O)(=O)c3c([H])c([H])c(c([H])c3[H])C([H])([H])[H])c([H])c([H])c2O[C@@]([H])(C([H])([H])N(C([H])([H])[H])S(=O)(=O)c2sc([H])c([H])c2[H])[C@]([H])(C([H])([H])[H])C1([H])[H])C([H])([H])[H]	0 (Inactive)	0	0	0
1174	PUBCHEM_CID_44484040	[H]OC([H])([H])[C@]([H])(N1C(=O)c2c([H])c(N([H])C(=O)C([H])([H])c3c([H])n(c4c([H])c([H])c([H])c([H])c34)C([H])([H])[H])c([H])c([H])c2O[C@@]([H])(C([H])([H])N(C([H])([H])[H])S(=O)(=O)c2nc([H])n(c2[H])C([H])([H])[H])[C@]([H])(C([H])([H])[H])C1([H])[H])C([H])([H])[H]	0 (Inactive)	0	0	0
1175	PUBCHEM_CID_44484041	[H]OC([H])([H])[C@@]([H])(N1C(=O)c2c([H])c(c([H])c([H])c2O[C@]([H])(C([H])([H])N(C(=O)N([H])c2c([H])c([H])c(c([H])c2[H])C(F)(F)F)C([H])([H])[H])[C@@]([H])(C([H])([H])[H])C1([H])[H])N(C([H])([H])[H])C([H])([H])[H])C([H])([H])[H]	0 (Inactive)	0	0	0
1176	PUBCHEM_CID_44484042	[H]OC([H])([H])[C@@]([H])(N1C(=O)c2c([H])c(N([H])S(=O)(=O)c3c(noc3C([H])([H])[H])C([H])([H])[H])c([H])c([H])c2O[C@]([H])(C([H])([H])N(C(=O)N([H])C2([H])C([H])([H])C([H])([H])C([H])([H])C([H])([H])C2([H])[H])C([H])([H])[H])[C@@]([H])(C([H])([H])[H])C1([H])[H])C([H])([H])[H]	0 (Inactive)	0	0	0
1177	PUBCHEM_CID_44484043	[H]OC([H])([H])[C@@]([H])(N1C(=O)c2c([H])c(N([H])C(=O)N([H])c3c(noc3C([H])([H])[H])C([H])([H])[H])c([H])c([H])c2O[C@]([H])(C([H])([H])N(C([H])([H])[H])C([H])([H])c2c([H])c([H])c(OC([H])([H])[H])c([H])c2[H])[C@@]([H])(C([H])([H])[H])C1([H])[H])C([H])([H])[H]	0 (Inactive)	0	0	0
1178	PUBCHEM_CID_44484044	[H]OC([H])([H])[C@]([H])(N1C(=O)c2c([H])c(N([H])S(=O)(=O)c3sc([H])c([H])c3[H])c([H])c([H])c2O[C@@]([H])(C([H])([H])N(C([H])([H])[H])C([H])([H])c2c([H])c([H])c(Oc3c([H])c([H])c([H])c([H])c3[H])c([H])c2[H])[C@]([H])(C([H])([H])[H])C1([H])[H])C([H])([H])[H]	0 (Inactive)	0	0	0
1179	PUBCHEM_CID_44484045	[H]OC([H])([H])[C@]([H])(N1C(=O)c2c([H])c(N([H])C(=O)N([H])c3c(noc3C([H])([H])[H])C([H])([H])[H])c([H])c([H])c2O[C@@]([H])(C([H])([H])N(C([H])([H])[H])S(=O)(=O)c2c([H])c([H])c(c([H])c2[H])C([H])([H])[H])[C@]([H])(C([H])([H])[H])C1([H])[H])C([H])([H])[H]	0 (Inactive)	0	0	0
1180	PUBCHEM_CID_44484046	[H]OC([H])([H])[C@@]([H])(N1C(=O)c2c([H])c(N([H])C(=O)N([H])c3c([H])c([H])c4OC([H])([H])Oc4c3[H])c([H])c([H])c2O[C@]([H])(C([H])([H])N(C(=O)N([H])c2c([H])c([H])c(OC([H])([H])[H])c([H])c2[H])C([H])([H])[H])[C@@]([H])(C([H])([H])[H])C1([H])[H])C([H])([H])[H]	0 (Inactive)	0	0	0
1181	PUBCHEM_CID_44484047	[H]OC([H])([H])[C@@]([H])(N1C(=O)c2c([H])c(N([H])S(=O)(=O)c3c(noc3C([H])([H])[H])C([H])([H])[H])c([H])c([H])c2O[C@]([H])(C([H])([H])N(C([H])([H])[H])S(=O)(=O)c2nc([H])n(c2[H])C([H])([H])[H])[C@@]([H])(C([H])([H])[H])C1([H])[H])C([H])([H])[H]	0 (Inactive)	0	0	0
1182	PUBCHEM_CID_44484048	[H]OC([H])([H])[C@]([H])(N1C(=O)c2c([H])c(N([H])C(=O)N([H])c3c([H])c([H])c4OC([H])([H])Oc4c3[H])c([H])c([H])c2O[C@@]([H])(C([H])([H])N(C([H])([H])[H])C([H])([H])c2c([H])c([H])c(Oc3c([H])c([H])c([H])c([H])c3[H])c([H])c2[H])[C@]([H])(C([H])([H])[H])C1([H])[H])C([H])([H])[H]	0 (Inactive)	0	0	0
1183	PUBCHEM_CID_44484049	[H]OC([H])([H])[C@@]([H])(N1C(=O)c2c([H])c(N([H])S(=O)(=O)c3c([H])c([H])c(F)c([H])c3[H])c([H])c([H])c2O[C@]([H])(C([H])([H])N(C([H])([H])[H])C([H])([H])C2([H])C([H])([H])C([H])([H])C([H])([H])C([H])([H])C2([H])[H])[C@@]([H])(C([H])([H])[H])C1([H])[H])C([H])([H])[H]	0 (Inactive)	0	0	0
1184	PUBCHEM_CID_44484050	[H]OC([H])([H])[C@@]([H])(N1C(=O)c2c([H])c(N([H])C(=O)C([H])([H])c3c([H])n(c4c([H])c([H])c([H])c([H])c34)C([H])([H])[H])c([H])c([H])c2O[C@]([H])(C([H])([H])N(C([H])([H])[H])C([H])([H])c2c([H])c([H])c(OC([H])([H])[H])c([H])c2[H])[C@@]([H])(C([H])([H])[H])C1([H])[H])C([H])([H])[H]	0 (Inactive)	0	0	0
1185	PUBCHEM_CID_44484051	[H]OC([H])([H])[C@@]([H])(N1C(=O)c2c([H])c(N([H])C(=O)C([H])([H])C([H])([H])C([H])([H])N(C([H])([H])[H])C([H])([H])[H])c([H])c([H])c2O[C@]([H])(C([H])([H])N(C([H])([H])[H])C([H])([H])c2c([H])c([H])c(c([H])c2[H])-c2c([H])c([H])c([H])c([H])c2[H])[C@@]([H])(C([H])([H])[H])C1([H])[H])C([H])([H])[H]	0 (Inactive)	0	0	0
1186	PUBCHEM_CID_44484052	[H]OC([H])([H])[C@@]([H])(N1C(=O)c2c([H])c(N([H])C(=O)C([H])([H])C([H])([H])N3C([H])([H])C([H])([H])OC([H])([H])C3([H])[H])c([H])c([H])c2O[C@]([H])(C([H])([H])N(C([H])([H])[H])C([H])([H])c2c([H])c([H])nc([H])c2[H])[C@@]([H])(C([H])([H])[H])C1([H])[H])C([H])([H])[H]	0 (Inactive)	0	0	0
1187	PUBCHEM_CID_44484053	[H]OC([H])([H])[C@@]([H])(N1C(=O)c2c([H])c(N([H])S(=O)(=O)c3sc([H])c([H])c3[H])c([H])c([H])c2O[C@]([H])(C([H])([H])N(C([H])([H])[H])C([H])([H])c2c([H])c([H])c([H])c([H])c2[H])[C@@]([H])(C([H])([H])[H])C1([H])[H])C([H])([H])[H]	0 (Inactive)	0	0	0
1188	PUBCHEM_CID_44484054	[H]OC([H])([H])[C@@]([H])(N1C(=O)c2c([H])c(N([H])C(=O)C3([H])C([H])([H])C3([H])[H])c([H])c([H])c2O[C@]([H])(C([H])([H])N(C([H])([H])[H])C([H])([H])c2c([H])c([H])c(OC([H])([H])[H])c([H])c2[H])[C@@]([H])(C([H])([H])[H])C1([H])[H])C([H])([H])[H]	0 (Inactive)	0	0	0
1189	PUBCHEM_CID_44484055	[H]OC([H])([H])[C@@]([H])(N1C(=O)c2c([H])c(c([H])c([H])c2O[C@]([H])(C([H])([H])N(C(=O)N([H])c2c([H])c([H])c3OC([H])([H])Oc3c2[H])C([H])([H])[H])[C@@]([H])(C([H])([H])[H])C1([H])[H])N(C([H])([H])[H])C([H])([H])[H])C([H])([H])[H]	0 (Inactive)	0	0	0
1190	PUBCHEM_CID_44484056	[H]OC([H])([H])[C@@]([H])(N1C(=O)c2c([H])c(N([H])S(=O)(=O)c3c([H])c([H])c(c([H])c3[H])C([H])([H])[H])c([H])c([H])c2O[C@]([H])(C([H])([H])N(C([H])([H])[H])C([H])([H])c2c([H])c([H])c(OC([H])([H])[H])c([H])c2[H])[C@@]([H])(C([H])([H])[H])C1([H])[H])C([H])([H])[H]	0 (Inactive)	0	0	0
1191	PUBCHEM_CID_44484057	[H]OC([H])([H])[C@@]([H])(N1C(=O)c2c([H])c(c([H])c([H])c2O[C@]([H])(C([H])([H])N(C(=O)N([H])c2c([H])c([H])c([H])c3c([H])c([H])c([H])c([H])c23)C([H])([H])[H])[C@@]([H])(C([H])([H])[H])C1([H])[H])N(C([H])([H])[H])C([H])([H])[H])C([H])([H])[H]	0 (Inactive)	0	0	0
1192	PUBCHEM_CID_44484058	[H]OC([H])([H])[C@@]([H])(N1C(=O)c2c([H])c(N([H])S(=O)(=O)C([H])([H])[H])c([H])c([H])c2O[C@]([H])(C([H])([H])N(C([H])([H])[H])S(=O)(=O)c2c([H])c([H])c(OC([H])([H])[H])c([H])c2[H])[C@@]([H])(C([H])([H])[H])C1([H])[H])C([H])([H])[H]	0 (Inactive)	0	0	0
1193	PUBCHEM_CID_44484059	[H]OC([H])([H])[C@@]([H])(N1C(=O)c2c([H])c(N([H])S(=O)(=O)c3sc([H])c([H])c3[H])c([H])c([H])c2O[C@]([H])(C([H])([H])N(C([H])([H])[H])S(=O)(=O)C([H])([H])[H])[C@@]([H])(C([H])([H])[H])C1([H])[H])C([H])([H])[H]	0 (Inactive)	0	0	0
1194	PUBCHEM_CID_44484060	[H]OC([H])([H])[C@@]([H])(N1C(=O)c2c([H])c(N([H])S(=O)(=O)c3c(noc3C([H])([H])[H])C([H])([H])[H])c([H])c([H])c2O[C@]([H])(C([H])([H])N(C([H])([H])[H])S(=O)(=O)c2c([H])c([H])c(OC([H])([H])[H])c([H])c2[H])[C@@]([H])(C([H])([H])[H])C1([H])[H])C([H])([H])[H]	0 (Inactive)	0	0	0
1195	PUBCHEM_CID_44484061	[H]OC([H])([H])[C@@]([H])(N1C(=O)c2c([H])c(N([H])S(=O)(=O)c3c(noc3C([H])([H])[H])C([H])([H])[H])c([H])c([H])c2O[C@]([H])(C([H])([H])N(C([H])([H])[H])S(=O)(=O)C([H])([H])[H])[C@@]([H])(C([H])([H])[H])C1([H])[H])C([H])([H])[H]	0 (Inactive)	0	0	0
1196	PUBCHEM_CID_44484062	[H]OC([H])([H])[C@@]([H])(N1C(=O)c2c([H])c(N([H])S(=O)(=O)C([H])([H])[H])c([H])c([H])c2O[C@]([H])(C([H])([H])N(C(=O)N([H])c2c([H])c([H])c([H])c3c([H])c([H])c([H])c([H])c23)C([H])([H])[H])[C@@]([H])(C([H])([H])[H])C1([H])[H])C([H])([H])[H]	0 (Inactive)	0	0	0
1197	PUBCHEM_CID_44484063	[H]OC([H])([H])[C@@]([H])(N1C(=O)c2c([H])c(N([H])C(=O)c3c([H])c([H])nc([H])c3[H])c([H])c([H])c2O[C@]([H])(C([H])([H])N(C([H])([H])[H])S(=O)(=O)c2sc([H])c([H])c2[H])[C@@]([H])(C([H])([H])[H])C1([H])[H])C([H])([H])[H]	0 (Inactive)	0	0	0
1198	PUBCHEM_CID_44484064	[H]OC([H])([H])[C@@]([H])(N1C(=O)c2c([H])c(N([H])C(=O)N([H])C3([H])C([H])([H])C([H])([H])C([H])([H])C([H])([H])C3([H])[H])c([H])c([H])c2O[C@]([H])(C([H])([H])N(C(=O)N([H])c2c([H])c([H])c([H])c3c([H])c([H])c([H])c([H])c23)C([H])([H])[H])[C@@]([H])(C([H])([H])[H])C1([H])[H])C([H])([H])[H]	0 (Inactive)	0	0	0
1200	PUBCHEM_CID_44484066	[H]OC([H])([H])[C@@]([H])(N1C(=O)c2c([H])c(N([H])S(=O)(=O)c3c([H])c([H])c(OC([H])([H])[H])c([H])c3[H])c([H])c([H])c2O[C@]([H])(C([H])([H])N(C([H])([H])[H])C([H])([H])C2([H])C([H])([H])C([H])([H])C([H])([H])C([H])([H])C2([H])[H])[C@@]([H])(C([H])([H])[H])C1([H])[H])C([H])([H])[H]	0 (Inactive)	0	0	0
1201	PUBCHEM_CID_44484067	[H]OC([H])([H])[C@@]([H])(N1C(=O)c2c([H])c(N([H])C(=O)N([H])C3([H])C([H])([H])C([H])([H])C([H])([H])C([H])([H])C3([H])[H])c([H])c([H])c2O[C@]([H])(C([H])([H])N(C([H])([H])[H])C([H])([H])[H])[C@@]([H])(C([H])([H])[H])C1([H])[H])C([H])([H])[H]	0 (Inactive)	0	0	0
1202	PUBCHEM_CID_44484068	[H]OC([H])([H])[C@@]([H])(N1C(=O)c2c([H])c(N([H])S(=O)(=O)C([H])([H])[H])c([H])c([H])c2O[C@]([H])(C([H])([H])N(C([H])([H])[H])C([H])([H])c2c([H])c([H])c(c([H])c2[H])-c2c([H])c([H])c([H])c([H])c2[H])[C@@]([H])(C([H])([H])[H])C1([H])[H])C([H])([H])[H]	0 (Inactive)	0	0	0
1203	PUBCHEM_CID_44484069	[H]OC([H])([H])[C@@]([H])(N1C(=O)c2c([H])c(N([H])S(=O)(=O)c3sc([H])c([H])c3[H])c([H])c([H])c2O[C@]([H])(C([H])([H])N(C([H])([H])[H])C([H])([H])C2([H])C([H])([H])C([H])([H])C([H])([H])C([H])([H])C2([H])[H])[C@@]([H])(C([H])([H])[H])C1([H])[H])C([H])([H])[H]	0 (Inactive)	0	0	0
1204	PUBCHEM_CID_44484070	[H]OC([H])([H])[C@@]([H])(N1C(=O)c2c([H])c(N([H])S(=O)(=O)C([H])([H])[H])c([H])c([H])c2O[C@]([H])(C([H])([H])N(C([H])([H])[H])S(=O)(=O)c2c([H])c([H])c(c([H])c2[H])C([H])([H])[H])[C@@]([H])(C([H])([H])[H])C1([H])[H])C([H])([H])[H]	0 (Inactive)	0	0	0
1205	PUBCHEM_CID_44484071	[H]OC([H])([H])[C@@]([H])(N1C(=O)c2c([H])c(N([H])C(=O)C([H])([H])C([H])([H])C([H])([H])N(C([H])([H])[H])C([H])([H])[H])c([H])c([H])c2O[C@]([H])(C([H])([H])N(C([H])([H])[H])C([H])([H])C2([H])C([H])([H])C([H])([H])C([H])([H])C([H])([H])C2([H])[H])[C@@]([H])(C([H])([H])[H])C1([H])[H])C([H])([H])[H]	0 (Inactive)	0	0	0
1206	PUBCHEM_CID_44484072	[H]OC([H])([H])[C@@]([H])(N1C(=O)c2c([H])c(N([H])C(=O)C([H])([H])C([H])([H])N3C([H])([H])C([H])([H])OC([H])([H])C3([H])[H])c([H])c([H])c2O[C@]([H])(C([H])([H])N(C([H])([H])[H])S(=O)(=O)c2sc([H])c([H])c2[H])[C@@]([H])(C([H])([H])[H])C1([H])[H])C([H])([H])[H]	0 (Inactive)	0	0	0
1207	PUBCHEM_CID_44484073	[H]OC([H])([H])[C@]([H])(N1C(=O)c2c([H])c(N([H])C(=O)N([H])c3c([H])c([H])c4OC([H])([H])Oc4c3[H])c([H])c([H])c2O[C@]([H])(C([H])([H])N(C([H])([H])[H])C([H])([H])c2c([H])c([H])c(OC([H])([H])[H])c([H])c2[H])[C@@]([H])(C([H])([H])[H])C1([H])[H])C([H])([H])[H]	0 (Inactive)	0	0	0
1208	PUBCHEM_CID_44484074	[H]OC([H])([H])[C@@]([H])(N1C(=O)c2c([H])c(N([H])C(=O)C([H])([H])n3nnnc3[H])c([H])c([H])c2O[C@]([H])(C([H])([H])N(C([H])([H])[H])C([H])([H])c2c([H])c([H])c(c([H])c2[H])-c2c([H])c([H])c([H])c([H])c2[H])[C@@]([H])(C([H])([H])[H])C1([H])[H])C([H])([H])[H]	0 (Inactive)	0	0	0
1209	PUBCHEM_CID_44484075	[H]OC([H])([H])[C@@]([H])(N1C(=O)c2c([H])c(N([H])C(=O)C([H])([H])c3c([H])n(c4c([H])c([H])c([H])c([H])c34)C([H])([H])[H])c([H])c([H])c2O[C@]([H])(C([H])([H])N(C([H])([H])[H])S(=O)(=O)c2nc([H])n(c2[H])C([H])([H])[H])[C@@]([H])(C([H])([H])[H])C1([H])[H])C([H])([H])[H]	0 (Inactive)	0	0	0
1210	PUBCHEM_CID_44484076	[H]OC([H])([H])[C@@]([H])(N1C(=O)c2c([H])c(N([H])C(=O)C([H])([H])C([H])([H])C([H])([H])N(C([H])([H])[H])C([H])([H])[H])c([H])c([H])c2O[C@]([H])(C([H])([H])N(C([H])([H])[H])C([H])([H])[H])[C@@]([H])(C([H])([H])[H])C1([H])[H])C([H])([H])[H]	0 (Inactive)	0	0	0
1211	PUBCHEM_CID_44484077	[H]OC([H])([H])[C@@]([H])(N1C(=O)c2c([H])c(N([H])C(=O)C([H])([H])C([H])([H])C(F)(F)F)c([H])c([H])c2O[C@]([H])(C([H])([H])N([H])C([H])([H])[H])[C@@]([H])(C([H])([H])[H])C1([H])[H])C([H])([H])[H]	0 (Inactive)	0	0	0
1212	PUBCHEM_CID_44484078	[H]OC([H])([H])[C@@]([H])(N1C(=O)c2c([H])c(N([H])S(=O)(=O)c3sc([H])c([H])c3[H])c([H])c([H])c2O[C@]([H])(C([H])([H])N(C(=O)N([H])c2c([H])c([H])c3OC([H])([H])Oc3c2[H])C([H])([H])[H])[C@@]([H])(C([H])([H])[H])C1([H])[H])C([H])([H])[H]	0 (Inactive)	0	0	0
1213	PUBCHEM_CID_44484079	[H]OC([H])([H])[C@@]([H])(N1C(=O)c2c([H])c(N([H])S(=O)(=O)C([H])([H])[H])c([H])c([H])c2O[C@]([H])(C([H])([H])N(C([H])([H])[H])S(=O)(=O)c2c([H])c([H])c(Cl)c([H])c2[H])[C@@]([H])(C([H])([H])[H])C1([H])[H])C([H])([H])[H]	0 (Inactive)	0	0	0
1214	PUBCHEM_CID_44484080	[H]OC([H])([H])[C@@]([H])(N1C(=O)c2c([H])c(N([H])S(=O)(=O)C([H])([H])[H])c([H])c([H])c2O[C@]([H])(C([H])([H])N(C(=O)N([H])c2c([H])c([H])c3OC([H])([H])Oc3c2[H])C([H])([H])[H])[C@@]([H])(C([H])([H])[H])C1([H])[H])C([H])([H])[H]	0 (Inactive)	0	0	0
1216	PUBCHEM_CID_44484082	[H]OC([H])([H])[C@@]([H])(N1C(=O)c2c([H])c(N([H])S(=O)(=O)c3nc([H])n(c3[H])C([H])([H])[H])c([H])c([H])c2O[C@]([H])(C([H])([H])N(C(=O)N([H])c2c(noc2C([H])([H])[H])C([H])([H])[H])C([H])([H])[H])[C@@]([H])(C([H])([H])[H])C1([H])[H])C([H])([H])[H]	0 (Inactive)	0	0	0
1217	PUBCHEM_CID_44484083	[H]OC([H])([H])[C@@]([H])(N1C(=O)c2c([H])c(N([H])C(=O)C([H])([H])C([H])([H])N3C([H])([H])C([H])([H])OC([H])([H])C3([H])[H])c([H])c([H])c2O[C@]([H])(C([H])([H])N(C([H])([H])[H])C([H])([H])C2([H])C([H])([H])C([H])([H])C([H])([H])C([H])([H])C2([H])[H])[C@@]([H])(C([H])([H])[H])C1([H])[H])C([H])([H])[H]	0 (Inactive)	0	0	0
1218	PUBCHEM_CID_44484084	[H]OC([H])([H])[C@@]([H])(N1C(=O)c2c([H])c(N([H])S(=O)(=O)c3sc([H])c([H])c3[H])c([H])c([H])c2O[C@]([H])(C([H])([H])N(C([H])([H])[H])S(=O)(=O)c2c([H])c([H])c(F)c([H])c2[H])[C@@]([H])(C([H])([H])[H])C1([H])[H])C([H])([H])[H]	0 (Inactive)	0	0	0
1219	PUBCHEM_CID_44484085	[H]OC([H])([H])[C@@]([H])(N1C(=O)c2c([H])c(N([H])C(=O)C([H])([H])c3c([H])n(c4c([H])c([H])c([H])c([H])c34)C([H])([H])[H])c([H])c([H])c2O[C@]([H])(C([H])([H])N(C(=O)N([H])c2c(noc2C([H])([H])[H])C([H])([H])[H])C([H])([H])[H])[C@@]([H])(C([H])([H])[H])C1([H])[H])C([H])([H])[H]	0 (Inactive)	0	0	0
1220	PUBCHEM_CID_44484086	[H]OC([H])([H])[C@@]([H])(N1C(=O)c2c([H])c(N([H])S(=O)(=O)C([H])([H])[H])c([H])c([H])c2O[C@]([H])(C([H])([H])N(C([H])([H])[H])C([H])([H])c2c([H])c([H])c(Cl)c(Cl)c2[H])[C@@]([H])(C([H])([H])[H])C1([H])[H])C([H])([H])[H]	0 (Inactive)	0	0	0
1221	PUBCHEM_CID_44484087	[H]OC([H])([H])[C@@]([H])(N1C(=O)c2c([H])c(N([H])S(=O)(=O)C([H])([H])[H])c([H])c([H])c2O[C@]([H])(C([H])([H])N(C([H])([H])[H])C([H])([H])C2([H])C([H])([H])C([H])([H])C([H])([H])C([H])([H])C2([H])[H])[C@@]([H])(C([H])([H])[H])C1([H])[H])C([H])([H])[H]	0 (Inactive)	0	0	0
1222	PUBCHEM_CID_44484088	[H]OC([H])([H])[C@@]([H])(N1C(=O)c2c([H])c(N([H])S(=O)(=O)c3c([H])c([H])c([H])c([H])c3[H])c([H])c([H])c2O[C@]([H])(C([H])([H])N(C([H])([H])[H])C([H])([H])c2c([H])c([H])c(OC([H])([H])[H])c([H])c2[H])[C@@]([H])(C([H])([H])[H])C1([H])[H])C([H])([H])[H]	0 (Inactive)	0	0	0
1223	PUBCHEM_CID_44484089	[H]OC([H])([H])[C@@]([H])(N1C(=O)c2c([H])c(N([H])C(=O)C([H])([H])C([H])([H])N3C([H])([H])C([H])([H])OC([H])([H])C3([H])[H])c([H])c([H])c2O[C@]([H])(C([H])([H])N(C(=O)N([H])c2c([H])c([H])c(c([H])c2[H])C(F)(F)F)C([H])([H])[H])[C@@]([H])(C([H])([H])[H])C1([H])[H])C([H])([H])[H]	0 (Inactive)	0	0	0
1224	PUBCHEM_CID_44484090	[H]OC([H])([H])[C@@]([H])(N1C(=O)c2c([H])c(N([H])S(=O)(=O)c3c([H])c([H])c(Cl)c([H])c3[H])c([H])c([H])c2O[C@]([H])(C([H])([H])N(C([H])([H])[H])C([H])([H])c2c([H])c([H])c(Oc3c([H])c([H])c([H])c([H])c3[H])c([H])c2[H])[C@@]([H])(C([H])([H])[H])C1([H])[H])C([H])([H])[H]	0 (Inactive)	0	0	0
1225	PUBCHEM_CID_44484091	[H]OC([H])([H])[C@@]([H])(N1C(=O)c2c([H])c(N([H])C(=O)C([H])([H])C([H])([H])N3C([H])([H])C([H])([H])OC([H])([H])C3([H])[H])c([H])c([H])c2O[C@]([H])(C([H])([H])N(C([H])([H])[H])C([H])([H])c2c([H])c([H])c(Oc3c([H])c([H])c([H])c([H])c3[H])c([H])c2[H])[C@@]([H])(C([H])([H])[H])C1([H])[H])C([H])([H])[H]	0 (Inactive)	0	0	0
1226	PUBCHEM_CID_44484092	[H]OC([H])([H])[C@@]([H])(N1C(=O)c2c([H])c(N([H])S(=O)(=O)c3c([H])c([H])c(Cl)c([H])c3[H])c([H])c([H])c2O[C@]([H])(C([H])([H])N(C([H])([H])[H])S(=O)(=O)c2sc([H])c([H])c2[H])[C@@]([H])(C([H])([H])[H])C1([H])[H])C([H])([H])[H]	0 (Inactive)	0	0	0
1227	PUBCHEM_CID_44484093	[H]OC([H])([H])[C@@]([H])(N1C(=O)c2c([H])c(N([H])C(=O)C([H])([H])c3c([H])n(c4c([H])c([H])c([H])c([H])c34)C([H])([H])[H])c([H])c([H])c2O[C@]([H])(C([H])([H])N(C(=O)N([H])c2c([H])c([H])c([H])c3c([H])c([H])c([H])c([H])c23)C([H])([H])[H])[C@@]([H])(C([H])([H])[H])C1([H])[H])C([H])([H])[H]	0 (Inactive)	0	0	0
1228	PUBCHEM_CID_44484094	[H]OC([H])([H])[C@]([H])(N1C(=O)c2c([H])c(N([H])S(=O)(=O)c3c(noc3C([H])([H])[H])C([H])([H])[H])c([H])c([H])c2O[C@@]([H])(C([H])([H])N(C(=O)N([H])c2c([H])c([H])c([H])c3c([H])c([H])c([H])c([H])c23)C([H])([H])[H])[C@@]([H])(C([H])([H])[H])C1([H])[H])C([H])([H])[H]	0 (Inactive)	0	0	0
1229	PUBCHEM_CID_44484095	[H]OC([H])([H])[C@]([H])(N1C(=O)c2c([H])c(N([H])C(=O)N([H])C([H])(C([H])([H])[H])C([H])([H])[H])c([H])c([H])c2O[C@@]([H])(C([H])([H])N(C([H])([H])[H])C([H])([H])c2c([H])c([H])c([H])c([H])c2[H])[C@@]([H])(C([H])([H])[H])C1([H])[H])C([H])([H])[H]	0 (Inactive)	0	0	0
1230	PUBCHEM_CID_44484096	[H]OC([H])([H])[C@]([H])(N1C(=O)c2c([H])c(N([H])C(=O)C([H])([H])C([H])([H])C([H])([H])N(C([H])([H])[H])C([H])([H])[H])c([H])c([H])c2O[C@@]([H])(C([H])([H])N(C([H])([H])[H])S(=O)(=O)c2nc([H])n(c2[H])C([H])([H])[H])[C@@]([H])(C([H])([H])[H])C1([H])[H])C([H])([H])[H]	0 (Inactive)	0	0	0
1231	PUBCHEM_CID_44484097	[H]OC([H])([H])[C@]([H])(N1C(=O)c2c([H])c(N([H])C(=O)N([H])c3c([H])c([H])c4OC([H])([H])Oc4c3[H])c([H])c([H])c2O[C@@]([H])(C([H])([H])N(C(=O)N([H])C2([H])C([H])([H])C([H])([H])C([H])([H])C([H])([H])C2([H])[H])C([H])([H])[H])[C@@]([H])(C([H])([H])[H])C1([H])[H])C([H])([H])[H]	0 (Inactive)	0	0	0
1233	PUBCHEM_CID_44484099	[H]OC([H])([H])[C@]([H])(N1C(=O)c2c([H])c(N([H])S(=O)(=O)c3sc([H])c([H])c3[H])c([H])c([H])c2O[C@@]([H])(C([H])([H])N(C([H])([H])[H])S(=O)(=O)c2c([H])c([H])c(Cl)c([H])c2[H])[C@@]([H])(C([H])([H])[H])C1([H])[H])C([H])([H])[H]	0 (Inactive)	0	0	0
1234	PUBCHEM_CID_44484100	[H]OC([H])([H])[C@]([H])(N1C(=O)c2c([H])c(N([H])S(=O)(=O)C([H])([H])[H])c([H])c([H])c2O[C@@]([H])(C([H])([H])N(C([H])([H])[H])C([H])([H])c2c([H])c([H])nc([H])c2[H])[C@@]([H])(C([H])([H])[H])C1([H])[H])C([H])([H])[H]	0 (Inactive)	0	0	0
1235	PUBCHEM_CID_44484101	[H]OC([H])([H])[C@]([H])(N1C(=O)c2c([H])c(N([H])S(=O)(=O)c3nc([H])n(c3[H])C([H])([H])[H])c([H])c([H])c2O[C@@]([H])(C([H])([H])N(C([H])([H])[H])C([H])([H])c2c([H])c([H])c([H])c([H])c2[H])[C@@]([H])(C([H])([H])[H])C1([H])[H])C([H])([H])[H]	0 (Inactive)	0	0	0
1236	PUBCHEM_CID_44484102	[H]OC([H])([H])[C@]([H])(N1C(=O)c2c([H])c(N([H])C(=O)N([H])c3c([H])c([H])c(OC([H])([H])[H])c([H])c3[H])c([H])c([H])c2O[C@@]([H])(C([H])([H])N(C(=O)N([H])C([H])(C([H])([H])[H])C([H])([H])[H])C([H])([H])[H])[C@@]([H])(C([H])([H])[H])C1([H])[H])C([H])([H])[H]	0 (Inactive)	0	0	0
1237	PUBCHEM_CID_44484103	[H]OC([H])([H])[C@]([H])(N1C(=O)c2c([H])c(N([H])C(=O)C3([H])C([H])([H])C([H])([H])C([H])([H])C([H])([H])C3([H])[H])c([H])c([H])c2O[C@@]([H])(C([H])([H])N(C(=O)N([H])c2c([H])c([H])c(OC([H])([H])[H])c([H])c2[H])C([H])([H])[H])[C@@]([H])(C([H])([H])[H])C1([H])[H])C([H])([H])[H]	0 (Inactive)	0	0	0
1238	PUBCHEM_CID_44484104	[H]OC([H])([H])[C@]([H])(N1C(=O)c2c([H])c(N([H])C(=O)c3c([H])c([H])nc([H])c3[H])c([H])c([H])c2O[C@@]([H])(C([H])([H])N(C([H])([H])[H])C([H])([H])c2c([H])c([H])c(c([H])c2[H])-c2c([H])c([H])c([H])c([H])c2[H])[C@@]([H])(C([H])([H])[H])C1([H])[H])C([H])([H])[H]	0 (Inactive)	0	0	0
1239	PUBCHEM_CID_44484105	[H]OC([H])([H])[C@]([H])(N1C(=O)c2c([H])c(N([H])S(=O)(=O)c3c([H])c([H])c(F)c([H])c3[H])c([H])c([H])c2O[C@@]([H])(C([H])([H])N(C([H])([H])[H])C([H])([H])C2([H])C([H])([H])C2([H])[H])[C@@]([H])(C([H])([H])[H])C1([H])[H])C([H])([H])[H]	0 (Inactive)	0	0	0
1240	PUBCHEM_CID_44484106	[H]OC([H])([H])[C@]([H])(N1C(=O)c2c([H])c(N([H])S(=O)(=O)c3c([H])c([H])c(c([H])c3[H])C([H])([H])[H])c([H])c([H])c2O[C@@]([H])(C([H])([H])N(C(=O)N([H])c2c([H])c([H])c(F)c([H])c2[H])C([H])([H])[H])[C@@]([H])(C([H])([H])[H])C1([H])[H])C([H])([H])[H]	0 (Inactive)	0	0	0
1241	PUBCHEM_CID_44484107	[H]OC([H])([H])[C@]([H])(N1C(=O)c2c([H])c(N([H])C(=O)c3c([H])c([H])nc([H])c3[H])c([H])c([H])c2O[C@@]([H])(C([H])([H])N(C(=O)N([H])C2([H])C([H])([H])C([H])([H])C([H])([H])C([H])([H])C2([H])[H])C([H])([H])[H])[C@@]([H])(C([H])([H])[H])C1([H])[H])C([H])([H])[H]	0 (Inactive)	0	0	0
1242	PUBCHEM_CID_44484108	[H]OC([H])([H])[C@]([H])(N1C(=O)c2c([H])c(N([H])C(=O)N([H])C([H])(C([H])([H])[H])C([H])([H])[H])c([H])c([H])c2O[C@@]([H])(C([H])([H])N(C([H])([H])[H])C([H])([H])C2([H])C([H])([H])C([H])([H])C([H])([H])C([H])([H])C2([H])[H])[C@@]([H])(C([H])([H])[H])C1([H])[H])C([H])([H])[H]	0 (Inactive)	0	0	0
1243	PUBCHEM_CID_44484109	[H]OC([H])([H])[C@]([H])(N1C(=O)c2c([H])c(N([H])C(=O)c3c([H])c([H])nc([H])c3[H])c([H])c([H])c2O[C@@]([H])(C([H])([H])N(C([H])([H])[H])C([H])([H])c2c([H])c([H])nc([H])c2[H])[C@@]([H])(C([H])([H])[H])C1([H])[H])C([H])([H])[H]	0 (Inactive)	0	0	0
1244	PUBCHEM_CID_44484110	[H]OC([H])([H])[C@]([H])(N1C(=O)c2c([H])c(N([H])C(=O)C([H])([H])C([H])([H])C(F)(F)F)c([H])c([H])c2O[C@@]([H])(C([H])([H])N(C([H])([H])[H])C([H])([H])c2c([H])c([H])c([H])c([H])c2[H])[C@@]([H])(C([H])([H])[H])C1([H])[H])C([H])([H])[H]	0 (Inactive)	0	0	0
1245	PUBCHEM_CID_44484111	[H]OC([H])([H])[C@]([H])(N1C(=O)c2c([H])c(N([H])C(=O)C([H])([H])c3c([H])n(c4c([H])c([H])c([H])c([H])c34)C([H])([H])[H])c([H])c([H])c2O[C@@]([H])(C([H])([H])N(C([H])([H])[H])C([H])([H])c2c([H])c([H])c(c([H])c2[H])C(F)(F)F)[C@@]([H])(C([H])([H])[H])C1([H])[H])C([H])([H])[H]	0 (Inactive)	0	0	0
1246	PUBCHEM_CID_44484112	[H]OC([H])([H])[C@]([H])(N1C(=O)c2c([H])c(N([H])S(=O)(=O)c3c([H])c([H])c(Cl)c([H])c3[H])c([H])c([H])c2O[C@@]([H])(C([H])([H])N(C([H])([H])[H])C([H])([H])c2c([H])c([H])c(c([H])c2[H])C(F)(F)F)[C@@]([H])(C([H])([H])[H])C1([H])[H])C([H])([H])[H]	0 (Inactive)	0	0	0
1247	PUBCHEM_CID_44484113	[H]OC([H])([H])[C@]([H])(N1C(=O)c2c([H])c(N([H])S(=O)(=O)c3sc([H])c([H])c3[H])c([H])c([H])c2O[C@@]([H])(C([H])([H])N(C([H])([H])[H])S(=O)(=O)C([H])([H])[H])[C@@]([H])(C([H])([H])[H])C1([H])[H])C([H])([H])[H]	0 (Inactive)	0	0	0
1248	PUBCHEM_CID_44484114	[H]OC([H])([H])[C@]([H])(N1C(=O)c2c([H])c(N([H])C(=O)N([H])c3c([H])c([H])c(OC([H])([H])[H])c([H])c3[H])c([H])c([H])c2O[C@@]([H])(C([H])([H])N(C([H])([H])[H])C([H])([H])[H])[C@@]([H])(C([H])([H])[H])C1([H])[H])C([H])([H])[H]	0 (Inactive)	0	0	0
1249	PUBCHEM_CID_44484115	[H]OC([H])([H])[C@]([H])(N1C(=O)c2c([H])c(N([H])C(=O)C([H])([H])C([H])([H])C(F)(F)F)c([H])c([H])c2O[C@@]([H])(C([H])([H])N(C(=O)N([H])C2([H])C([H])([H])C([H])([H])C([H])([H])C([H])([H])C2([H])[H])C([H])([H])[H])[C@@]([H])(C([H])([H])[H])C1([H])[H])C([H])([H])[H]	0 (Inactive)	0	0	0
1250	PUBCHEM_CID_44484116	[H]OC([H])([H])[C@]([H])(N1C(=O)c2c([H])c(N([H])S(=O)(=O)c3c([H])c([H])c(Cl)c([H])c3[H])c([H])c([H])c2O[C@@]([H])(C([H])([H])N(C([H])([H])[H])C([H])([H])c2c([H])c([H])c3OC([H])([H])Oc3c2[H])[C@@]([H])(C([H])([H])[H])C1([H])[H])C([H])([H])[H]	0 (Inactive)	0	0	0
1251	PUBCHEM_CID_44484117	[H]OC([H])([H])[C@]([H])(N1C(=O)c2c([H])c(N([H])S(=O)(=O)c3c(noc3C([H])([H])[H])C([H])([H])[H])c([H])c([H])c2O[C@@]([H])(C([H])([H])N(C([H])([H])[H])S(=O)(=O)c2nc([H])n(c2[H])C([H])([H])[H])[C@@]([H])(C([H])([H])[H])C1([H])[H])C([H])([H])[H]	0 (Inactive)	0	0	0
1252	PUBCHEM_CID_44484118	[H]OC([H])([H])[C@]([H])(N1C(=O)c2c([H])c(N([H])C(=O)c3c([H])c([H])nc([H])c3[H])c([H])c([H])c2O[C@@]([H])(C([H])([H])N(C(=O)N([H])C([H])(C([H])([H])[H])C([H])([H])[H])C([H])([H])[H])[C@@]([H])(C([H])([H])[H])C1([H])[H])C([H])([H])[H]	0 (Inactive)	0	0	0
1253	PUBCHEM_CID_44484119	[H]OC([H])([H])[C@]([H])(N1C(=O)c2c([H])c(N([H])S(=O)(=O)c3nc([H])n(c3[H])C([H])([H])[H])c([H])c([H])c2O[C@@]([H])(C([H])([H])N(C([H])([H])[H])C([H])([H])[H])[C@@]([H])(C([H])([H])[H])C1([H])[H])C([H])([H])[H]	0 (Inactive)	0	0	0
1254	PUBCHEM_CID_44484120	[H]OC([H])([H])[C@]([H])(N1C(=O)c2c([H])c(N([H])C(=O)N([H])c3c([H])c([H])c4OC([H])([H])Oc4c3[H])c([H])c([H])c2O[C@@]([H])(C([H])([H])N(C([H])([H])[H])C([H])([H])c2c([H])c([H])c(c([H])c2[H])-c2c([H])c([H])c([H])c([H])c2[H])[C@@]([H])(C([H])([H])[H])C1([H])[H])C([H])([H])[H]	0 (Inactive)	0	0	0
1255	PUBCHEM_CID_44484121	[H]OC([H])([H])[C@]([H])(N1C(=O)c2c([H])c(N([H])C(=O)c3c([H])c([H])nc([H])c3[H])c([H])c([H])c2O[C@@]([H])(C([H])([H])N(C([H])([H])[H])C([H])([H])c2c([H])c([H])c(c([H])c2[H])C(F)(F)F)[C@@]([H])(C([H])([H])[H])C1([H])[H])C([H])([H])[H]	0 (Inactive)	0	0	0
1256	PUBCHEM_CID_44484122	[H]OC([H])([H])[C@]([H])(N1C(=O)c2c([H])c(N([H])C(=O)C([H])([H])C([H])([H])N3C([H])([H])C([H])([H])OC([H])([H])C3([H])[H])c([H])c([H])c2O[C@@]([H])(C([H])([H])N(C(=O)N([H])C([H])(C([H])([H])[H])C([H])([H])[H])C([H])([H])[H])[C@@]([H])(C([H])([H])[H])C1([H])[H])C([H])([H])[H]	0 (Inactive)	0	0	0
1257	PUBCHEM_CID_44484123	[H]OC([H])([H])[C@]([H])(N1C(=O)c2c([H])c(N([H])C(=O)C3([H])C([H])([H])C3([H])[H])c([H])c([H])c2O[C@@]([H])(C([H])([H])N(C(=O)N([H])c2c([H])c([H])c([H])c([H])c2[H])C([H])([H])[H])[C@@]([H])(C([H])([H])[H])C1([H])[H])C([H])([H])[H]	0 (Inactive)	0	0	0
1258	PUBCHEM_CID_44484124	[H]OC([H])([H])[C@]([H])(N1C(=O)c2c([H])c(N([H])C(=O)C3([H])C([H])([H])C([H])([H])C([H])([H])C([H])([H])C3([H])[H])c([H])c([H])c2O[C@@]([H])(C([H])([H])N(C([H])([H])[H])C([H])([H])c2c([H])c([H])c3OC([H])([H])Oc3c2[H])[C@@]([H])(C([H])([H])[H])C1([H])[H])C([H])([H])[H]	0 (Inactive)	0	0	0
1259	PUBCHEM_CID_44484125	[H]OC([H])([H])[C@]([H])(N1C(=O)c2c([H])c(N([H])C(=O)N([H])c3c([H])c([H])c([H])c([H])c3[H])c([H])c([H])c2O[C@@]([H])(C([H])([H])N(C([H])([H])[H])C([H])([H])c2c([H])c([H])c([H])c([H])c2[H])[C@@]([H])(C([H])([H])[H])C1([H])[H])C([H])([H])[H]	0 (Inactive)	0	0	0
1260	PUBCHEM_CID_44484126	[H]OC([H])([H])[C@]([H])(N1C(=O)c2c([H])c(N([H])S(=O)(=O)c3c([H])c([H])c(F)c([H])c3[H])c([H])c([H])c2O[C@@]([H])(C([H])([H])N(C(=O)N([H])c2c([H])c([H])c([H])c3c([H])c([H])c([H])c([H])c23)C([H])([H])[H])[C@@]([H])(C([H])([H])[H])C1([H])[H])C([H])([H])[H]	0 (Inactive)	0	0	0
1261	PUBCHEM_CID_44484127	[H]OC([H])([H])[C@]([H])(N1C(=O)c2c([H])c(N([H])C(=O)N([H])c3c(noc3C([H])([H])[H])C([H])([H])[H])c([H])c([H])c2O[C@@]([H])(C([H])([H])N(C([H])([H])[H])C([H])([H])c2c([H])c([H])c([H])c([H])c2[H])[C@@]([H])(C([H])([H])[H])C1([H])[H])C([H])([H])[H]	0 (Inactive)	0	0	0
1262	PUBCHEM_CID_44484128	[H]OC([H])([H])[C@]([H])(N1C(=O)c2c([H])c(N([H])C(=O)N([H])c3c([H])c([H])c(c([H])c3[H])C(F)(F)F)c([H])c([H])c2O[C@@]([H])(C([H])([H])N(C([H])([H])[H])C([H])([H])c2c([H])c([H])c([H])c([H])c2[H])[C@@]([H])(C([H])([H])[H])C1([H])[H])C([H])([H])[H]	0 (Inactive)	0	0	0
1263	PUBCHEM_CID_44484129	[H]OC([H])([H])[C@]([H])(N1C(=O)c2c([H])c(N([H])S(=O)(=O)c3c([H])c([H])c([H])c([H])c3[H])c([H])c([H])c2O[C@@]([H])(C([H])([H])N(C(=O)N([H])c2c([H])c([H])c(F)c([H])c2[H])C([H])([H])[H])[C@@]([H])(C([H])([H])[H])C1([H])[H])C([H])([H])[H]	0 (Inactive)	0	0	0
1264	PUBCHEM_CID_44484130	[H]OC([H])([H])[C@]([H])(N1C(=O)c2c([H])c(N([H])C(=O)N([H])c3c(noc3C([H])([H])[H])C([H])([H])[H])c([H])c([H])c2O[C@@]([H])(C([H])([H])N(C([H])([H])[H])C([H])([H])C2([H])C([H])([H])C([H])([H])C([H])([H])C([H])([H])C2([H])[H])[C@@]([H])(C([H])([H])[H])C1([H])[H])C([H])([H])[H]	0 (Inactive)	0	0	0
1265	PUBCHEM_CID_44484131	[H]OC([H])([H])[C@]([H])(N1C(=O)c2c([H])c(N([H])C(=O)N([H])c3c([H])c([H])c4OC([H])([H])Oc4c3[H])c([H])c([H])c2O[C@@]([H])(C([H])([H])N(C([H])([H])[H])S(=O)(=O)c2c([H])c([H])c(c([H])c2[H])C([H])([H])[H])[C@@]([H])(C([H])([H])[H])C1([H])[H])C([H])([H])[H]	0 (Inactive)	0	0	0
1266	PUBCHEM_CID_44484132	[H]OC([H])([H])[C@]([H])(N1C(=O)c2c([H])c(N([H])C(=O)C3([H])C([H])([H])C3([H])[H])c([H])c([H])c2O[C@@]([H])(C([H])([H])N(C([H])([H])[H])C([H])([H])c2c([H])c([H])c([H])c([H])c2[H])[C@@]([H])(C([H])([H])[H])C1([H])[H])C([H])([H])[H]	0 (Inactive)	0	0	0
1267	PUBCHEM_CID_44484133	[H]OC([H])([H])[C@]([H])(N1C(=O)c2c([H])c(N([H])S(=O)(=O)c3c([H])c([H])c(c([H])c3[H])C([H])([H])[H])c([H])c([H])c2O[C@@]([H])(C([H])([H])N(C(=O)N([H])c2c([H])c([H])c([H])c([H])c2[H])C([H])([H])[H])[C@@]([H])(C([H])([H])[H])C1([H])[H])C([H])([H])[H]	0 (Inactive)	0	0	0
1268	PUBCHEM_CID_44484134	[H]OC([H])([H])[C@]([H])(N1C(=O)c2c([H])c(N([H])S(=O)(=O)c3c(noc3C([H])([H])[H])C([H])([H])[H])c([H])c([H])c2O[C@@]([H])(C([H])([H])N(C([H])([H])[H])C([H])([H])c2c([H])c([H])nc([H])c2[H])[C@@]([H])(C([H])([H])[H])C1([H])[H])C([H])([H])[H]	0 (Inactive)	0	0	0
1269	PUBCHEM_CID_44484135	[H]OC([H])([H])[C@]([H])(N1C(=O)c2c([H])c(N([H])C(=O)C([H])([H])C([H])([H])C([H])([H])N(C([H])([H])[H])C([H])([H])[H])c([H])c([H])c2O[C@@]([H])(C([H])([H])N(C(=O)N([H])c2c([H])c([H])c([H])c([H])c2[H])C([H])([H])[H])[C@@]([H])(C([H])([H])[H])C1([H])[H])C([H])([H])[H]	0 (Inactive)	0	0	0
1270	PUBCHEM_CID_44484136	[H]OC([H])([H])[C@]([H])(N1C(=O)c2c([H])c(N([H])C(=O)C([H])([H])C([H])([H])C(F)(F)F)c([H])c([H])c2O[C@@]([H])(C([H])([H])N(C([H])([H])[H])S(=O)(=O)c2c([H])c([H])c([H])c([H])c2[H])[C@@]([H])(C([H])([H])[H])C1([H])[H])C([H])([H])[H]	0 (Inactive)	0	0	0
1271	PUBCHEM_CID_44484137	[H]OC([H])([H])[C@]([H])(N1C(=O)c2c([H])c(N([H])C(=O)N([H])C3([H])C([H])([H])C([H])([H])C([H])([H])C([H])([H])C3([H])[H])c([H])c([H])c2O[C@@]([H])(C([H])([H])N(C([H])([H])[H])C([H])([H])c2c([H])c([H])c3OC([H])([H])Oc3c2[H])[C@@]([H])(C([H])([H])[H])C1([H])[H])C([H])([H])[H]	0 (Inactive)	0	0	0
1272	PUBCHEM_CID_44484138	[H]OC([H])([H])[C@]([H])(N1C(=O)c2c([H])c(N([H])C(=O)C([H])([H])C([H])([H])C(F)(F)F)c([H])c([H])c2O[C@@]([H])(C([H])([H])N(C([H])([H])[H])S(=O)(=O)C([H])([H])[H])[C@@]([H])(C([H])([H])[H])C1([H])[H])C([H])([H])[H]	0 (Inactive)	0	0	0
1273	PUBCHEM_CID_44484139	[H]OC([H])([H])[C@]([H])(N1C(=O)c2c([H])c(N([H])S(=O)(=O)c3c([H])c([H])c(OC([H])([H])[H])c([H])c3[H])c([H])c([H])c2O[C@@]([H])(C([H])([H])N(C([H])([H])[H])C([H])([H])c2c([H])c([H])c([H])c([H])c2[H])[C@@]([H])(C([H])([H])[H])C1([H])[H])C([H])([H])[H]	0 (Inactive)	0	0	0
1274	PUBCHEM_CID_44484140	[H]OC([H])([H])[C@]([H])(N1C(=O)c2c([H])c(N([H])S(=O)(=O)c3c([H])c([H])c(F)c([H])c3[H])c([H])c([H])c2O[C@@]([H])(C([H])([H])N(C(=O)N([H])c2c([H])c([H])c(F)c([H])c2[H])C([H])([H])[H])[C@@]([H])(C([H])([H])[H])C1([H])[H])C([H])([H])[H]	0 (Inactive)	0	0	0
1275	PUBCHEM_CID_44484141	[H]OC([H])([H])[C@]([H])(N1C(=O)c2c([H])c(N([H])C(=O)N([H])c3c([H])c([H])c(F)c([H])c3[H])c([H])c([H])c2O[C@@]([H])(C([H])([H])N(C([H])([H])[H])C([H])([H])c2c([H])c([H])c(c([H])c2[H])C(F)(F)F)[C@@]([H])(C([H])([H])[H])C1([H])[H])C([H])([H])[H]	0 (Inactive)	0	0	0
1276	PUBCHEM_CID_44484142	[H]OC([H])([H])[C@]([H])(N1C(=O)c2c([H])c(N([H])S(=O)(=O)c3c(noc3C([H])([H])[H])C([H])([H])[H])c([H])c([H])c2O[C@@]([H])(C([H])([H])N(C(=O)N([H])c2c([H])c([H])c(c([H])c2[H])C(F)(F)F)C([H])([H])[H])[C@@]([H])(C([H])([H])[H])C1([H])[H])C([H])([H])[H]	0 (Inactive)	0	0	0
1277	PUBCHEM_CID_44484143	[H]OC([H])([H])[C@]([H])(N1C(=O)c2c([H])c(N([H])S(=O)(=O)C([H])([H])[H])c([H])c([H])c2O[C@@]([H])(C([H])([H])N(C(=O)N([H])c2c([H])c([H])c(F)c([H])c2[H])C([H])([H])[H])[C@@]([H])(C([H])([H])[H])C1([H])[H])C([H])([H])[H]	0 (Inactive)	0	0	0
1278	PUBCHEM_CID_44484144	[H]OC([H])([H])[C@]([H])(N1C(=O)c2c([H])c(N([H])S(=O)(=O)C([H])([H])[H])c([H])c([H])c2O[C@@]([H])(C([H])([H])N(C(=O)N([H])c2c([H])c([H])c(c([H])c2[H])C(F)(F)F)C([H])([H])[H])[C@@]([H])(C([H])([H])[H])C1([H])[H])C([H])([H])[H]	0 (Inactive)	0	0	0
1279	PUBCHEM_CID_44484145	[H]OC([H])([H])[C@]([H])(N1C(=O)c2c([H])c(N([H])S(=O)(=O)c3c([H])c([H])c(c([H])c3[H])C([H])([H])[H])c([H])c([H])c2O[C@@]([H])(C([H])([H])N(C(=O)N([H])C([H])(C([H])([H])[H])C([H])([H])[H])C([H])([H])[H])[C@@]([H])(C([H])([H])[H])C1([H])[H])C([H])([H])[H]	0 (Inactive)	0	0	0
1280	PUBCHEM_CID_44484146	[H]OC([H])([H])[C@]([H])(N1C(=O)c2c([H])c(N([H])C(=O)N([H])c3c([H])c([H])c([H])c([H])c3[H])c([H])c([H])c2O[C@@]([H])(C([H])([H])N(C([H])([H])[H])C([H])([H])c2c([H])c([H])c3OC([H])([H])Oc3c2[H])[C@@]([H])(C([H])([H])[H])C1([H])[H])C([H])([H])[H]	0 (Inactive)	0	0	0
1281	PUBCHEM_CID_44484147	[H]OC([H])([H])[C@]([H])(N1C(=O)c2c([H])c(N([H])C(=O)N([H])c3c([H])c([H])c(c([H])c3[H])C(F)(F)F)c([H])c([H])c2O[C@@]([H])(C([H])([H])N(C([H])([H])[H])C([H])([H])[H])[C@@]([H])(C([H])([H])[H])C1([H])[H])C([H])([H])[H]	0 (Inactive)	0	0	0
1282	PUBCHEM_CID_44484148	[H]OC([H])([H])[C@]([H])(N1C(=O)c2c([H])c(N([H])C(=O)C([H])([H])C([H])([H])C(F)(F)F)c([H])c([H])c2O[C@@]([H])(C([H])([H])N(C(=O)N([H])C([H])(C([H])([H])[H])C([H])([H])[H])C([H])([H])[H])[C@@]([H])(C([H])([H])[H])C1([H])[H])C([H])([H])[H]	0 (Inactive)	0	0	0
1283	PUBCHEM_CID_44484149	[H]OC([H])([H])[C@]([H])(N1C(=O)c2c([H])c(N([H])S(=O)(=O)c3c([H])c([H])c(OC([H])([H])[H])c([H])c3[H])c([H])c([H])c2O[C@@]([H])(C([H])([H])N(C(=O)N([H])c2c([H])c([H])c([H])c([H])c2[H])C([H])([H])[H])[C@@]([H])(C([H])([H])[H])C1([H])[H])C([H])([H])[H]	0 (Inactive)	0	0	0
1284	PUBCHEM_CID_44484150	[H]OC([H])([H])[C@]([H])(N1C(=O)c2c([H])c(N([H])C(=O)C([H])([H])C([H])([H])N3C([H])([H])C([H])([H])OC([H])([H])C3([H])[H])c([H])c([H])c2O[C@@]([H])(C([H])([H])N(C([H])([H])[H])C([H])([H])[H])[C@@]([H])(C([H])([H])[H])C1([H])[H])C([H])([H])[H]	0 (Inactive)	0	0	0
1285	PUBCHEM_CID_44484151	[H]OC([H])([H])[C@]([H])(N1C(=O)c2c([H])c(N([H])S(=O)(=O)c3c([H])c([H])c(c([H])c3[H])C([H])([H])[H])c([H])c([H])c2O[C@@]([H])(C([H])([H])N(C(=O)N([H])c2c([H])c([H])c(c([H])c2[H])C(F)(F)F)C([H])([H])[H])[C@@]([H])(C([H])([H])[H])C1([H])[H])C([H])([H])[H]	0 (Inactive)	0	0	0
1286	PUBCHEM_CID_44484152	[H]OC([H])([H])[C@]([H])(N1C(=O)c2c([H])c(N([H])C(=O)N([H])c3c([H])c([H])c([H])c4c([H])c([H])c([H])c([H])c34)c([H])c([H])c2O[C@@]([H])(C([H])([H])N(C([H])([H])[H])C([H])([H])[H])[C@@]([H])(C([H])([H])[H])C1([H])[H])C([H])([H])[H]	0 (Inactive)	0	0	0
1287	PUBCHEM_CID_44484153	[H]OC([H])([H])[C@]([H])(N1C(=O)c2c([H])c(N([H])C(=O)N([H])c3c([H])c([H])c(OC([H])([H])[H])c([H])c3[H])c([H])c([H])c2O[C@@]([H])(C([H])([H])N(C([H])([H])[H])C([H])([H])c2c([H])c([H])c(c([H])c2[H])-c2c([H])c([H])c([H])c([H])c2[H])[C@@]([H])(C([H])([H])[H])C1([H])[H])C([H])([H])[H]	0 (Inactive)	0	0	0
1288	PUBCHEM_CID_44484154	[H]OC([H])([H])[C@]([H])(N1C(=O)c2c([H])c(N([H])S(=O)(=O)c3c([H])c([H])c(Cl)c([H])c3[H])c([H])c([H])c2O[C@@]([H])(C([H])([H])N(C([H])([H])[H])C([H])([H])c2c([H])c([H])c([H])c([H])c2[H])[C@@]([H])(C([H])([H])[H])C1([H])[H])C([H])([H])[H]	0 (Inactive)	0	0	0
1289	PUBCHEM_CID_44484155	[H]OC([H])([H])[C@]([H])(N1C(=O)c2c([H])c(N([H])C(=O)N([H])C3([H])C([H])([H])C([H])([H])C([H])([H])C([H])([H])C3([H])[H])c([H])c([H])c2O[C@@]([H])(C([H])([H])N(C([H])([H])[H])C([H])([H])c2c([H])c([H])c([H])c([H])c2[H])[C@@]([H])(C([H])([H])[H])C1([H])[H])C([H])([H])[H]	0 (Inactive)	0	0	0
1290	PUBCHEM_CID_44484156	[H]OC([H])([H])[C@]([H])(N1C(=O)c2c([H])c(N([H])C(=O)C([H])([H])n3nnnc3[H])c([H])c([H])c2O[C@@]([H])(C([H])([H])N(C([H])([H])[H])C([H])([H])C2([H])C([H])([H])C([H])([H])C([H])([H])C([H])([H])C2([H])[H])[C@@]([H])(C([H])([H])[H])C1([H])[H])C([H])([H])[H]	0 (Inactive)	0	0	0
1291	PUBCHEM_CID_44484157	[H]OC([H])([H])[C@]([H])(N1C(=O)c2c([H])c(N([H])C(=O)C([H])([H])C([H])([H])C([H])([H])N(C([H])([H])[H])C([H])([H])[H])c([H])c([H])c2O[C@@]([H])(C([H])([H])N(C([H])([H])[H])C([H])([H])[H])[C@@]([H])(C([H])([H])[H])C1([H])[H])C([H])([H])[H]	0 (Inactive)	0	0	0
1292	PUBCHEM_CID_44484158	[H]OC([H])([H])[C@]([H])(N1C(=O)c2c([H])c(N([H])C(=O)C([H])([H])C([H])([H])C(F)(F)F)c([H])c([H])c2O[C@@]([H])(C([H])([H])N(C([H])([H])[H])C([H])([H])[H])[C@@]([H])(C([H])([H])[H])C1([H])[H])C([H])([H])[H]	0 (Inactive)	0	0	0
1293	PUBCHEM_CID_44484159	[H]OC([H])([H])[C@]([H])(N1C(=O)c2c([H])c(N([H])S(=O)(=O)C([H])([H])[H])c([H])c([H])c2O[C@@]([H])(C([H])([H])N(C([H])([H])[H])C([H])([H])C2([H])C([H])([H])C([H])([H])C([H])([H])C([H])([H])C2([H])[H])[C@@]([H])(C([H])([H])[H])C1([H])[H])C([H])([H])[H]	0 (Inactive)	0	0	0
1294	PUBCHEM_CID_44484160	[H]OC([H])([H])[C@]([H])(N1C(=O)c2c([H])c(N([H])S(=O)(=O)c3c(noc3C([H])([H])[H])C([H])([H])[H])c([H])c([H])c2O[C@@]([H])(C([H])([H])N(C(=O)N([H])C([H])(C([H])([H])[H])C([H])([H])[H])C([H])([H])[H])[C@@]([H])(C([H])([H])[H])C1([H])[H])C([H])([H])[H]	0 (Inactive)	0	0	0
1295	PUBCHEM_CID_44484161	[H]OC([H])([H])[C@]([H])(N1C(=O)c2c([H])c(N([H])C(=O)C([H])([H])C([H])([H])C(F)(F)F)c([H])c([H])c2O[C@@]([H])(C([H])([H])N([H])C([H])([H])[H])[C@@]([H])(C([H])([H])[H])C1([H])[H])C([H])([H])[H]	0 (Inactive)	0	0	0
1296	PUBCHEM_CID_44484162	[H]OC([H])([H])[C@@]([H])(N1C(=O)c2c([H])c(c([H])c([H])c2O[C@]([H])(C([H])([H])N(C(=O)N([H])c2c(noc2C([H])([H])[H])C([H])([H])[H])C([H])([H])[H])[C@]([H])(C([H])([H])[H])C1([H])[H])N(C([H])([H])[H])C([H])([H])[H])C([H])([H])[H]	0 (Inactive)	0	0	0
1297	PUBCHEM_CID_44484163	[H]OC([H])([H])[C@@]([H])(N1C(=O)c2c([H])c(c([H])c([H])c2O[C@]([H])(C([H])([H])N(C(=O)N([H])C([H])(C([H])([H])[H])C([H])([H])[H])C([H])([H])[H])[C@]([H])(C([H])([H])[H])C1([H])[H])N(C([H])([H])[H])C([H])([H])[H])C([H])([H])[H]	0 (Inactive)	0	0	0
1298	PUBCHEM_CID_44484164	[H]OC([H])([H])[C@@]([H])(N1C(=O)c2c([H])c(N([H])C(=O)C([H])([H])C([H])([H])N3C([H])([H])C([H])([H])OC([H])([H])C3([H])[H])c([H])c([H])c2O[C@]([H])(C([H])([H])N([H])C([H])([H])[H])[C@]([H])(C([H])([H])[H])C1([H])[H])C([H])([H])[H]	0 (Inactive)	0	0	0
1300	PUBCHEM_CID_44484166	[H]OC([H])([H])[C@]([H])(N1C(=O)c2c([H])c(c([H])c([H])c2O[C@]([H])(C([H])([H])N(C([H])([H])[H])S(=O)(=O)c2c([H])c([H])c(F)c([H])c2[H])[C@]([H])(C([H])([H])[H])C1([H])[H])N(C([H])([H])[H])C([H])([H])[H])C([H])([H])[H]	0 (Inactive)	0	0	0
1301	PUBCHEM_CID_44484167	[H]OC([H])([H])[C@@]([H])(N1C(=O)c2c([H])c(N([H])S(=O)(=O)c3sc([H])c([H])c3[H])c([H])c([H])c2O[C@]([H])(C([H])([H])N(C([H])([H])[H])C([H])([H])c2c([H])c([H])nc([H])c2[H])[C@]([H])(C([H])([H])[H])C1([H])[H])C([H])([H])[H]	0 (Inactive)	0	0	0
1302	PUBCHEM_CID_44484168	[H]OC([H])([H])[C@]([H])(N1C(=O)c2c([H])c(N([H])C(=O)c3c([H])c([H])nc([H])c3[H])c([H])c([H])c2O[C@]([H])(C([H])([H])N(C(=O)N([H])C2([H])C([H])([H])C([H])([H])C([H])([H])C([H])([H])C2([H])[H])C([H])([H])[H])[C@]([H])(C([H])([H])[H])C1([H])[H])C([H])([H])[H]	0 (Inactive)	0	0	0
1303	PUBCHEM_CID_44202374	[H]OC([H])([H])[C@@]([H])(N1C(=O)c2c([H])c(c([H])c([H])c2O[C@]([H])(C([H])([H])N(C([H])([H])[H])C([H])([H])c2c([H])c([H])nc([H])c2[H])[C@]([H])(C([H])([H])[H])C1([H])[H])N(C([H])([H])[H])C([H])([H])[H])C([H])([H])[H]	0 (Inactive)	0	0	0
1304	PUBCHEM_CID_44484169	[H]OC([H])([H])[C@@]([H])(N1C(=O)c2c([H])c(N([H])S(=O)(=O)c3c([H])c([H])c(c([H])c3[H])C([H])([H])[H])c([H])c([H])c2O[C@@]([H])(C([H])([H])N(C([H])([H])[H])C([H])([H])c2c([H])c([H])c(c([H])c2[H])-c2c([H])c([H])c([H])c([H])c2[H])[C@@]([H])(C([H])([H])[H])C1([H])[H])C([H])([H])[H]	0 (Inactive)	0	0	0
1305	PUBCHEM_CID_44484170	[H]OC([H])([H])[C@@]([H])(N1C(=O)c2c([H])c(N([H])C(=O)C([H])([H])C([H])([H])C(F)(F)F)c([H])c([H])c2O[C@@]([H])(C([H])([H])N(C(=O)N([H])C([H])(C([H])([H])[H])C([H])([H])[H])C([H])([H])[H])[C@@]([H])(C([H])([H])[H])C1([H])[H])C([H])([H])[H]	0 (Inactive)	0	0	0
1306	PUBCHEM_CID_44484171	[H]OC([H])([H])[C@]([H])(N1C(=O)c2c([H])c(N([H])S(=O)(=O)c3sc([H])c([H])c3[H])c([H])c([H])c2O[C@]([H])(C([H])([H])N(C([H])([H])[H])C([H])([H])c2c([H])c([H])c3OC([H])([H])Oc3c2[H])[C@]([H])(C([H])([H])[H])C1([H])[H])C([H])([H])[H]	0 (Inactive)	0	0	0
1307	PUBCHEM_CID_44484172	[H]OC([H])([H])[C@@]([H])(N1C(=O)c2c([H])c(N([H])C(=O)C([H])([H])C([H])([H])C([H])([H])N(C([H])([H])[H])C([H])([H])[H])c([H])c([H])c2O[C@@]([H])(C([H])([H])N(C([H])([H])[H])C([H])([H])c2c([H])c([H])nc([H])c2[H])[C@@]([H])(C([H])([H])[H])C1([H])[H])C([H])([H])[H]	0 (Inactive)	0	0	0
1308	PUBCHEM_CID_44484173	[H]OC([H])([H])[C@@]([H])(N1C(=O)c2c([H])c(N([H])S(=O)(=O)c3c([H])c([H])c(F)c([H])c3[H])c([H])c([H])c2O[C@@]([H])(C([H])([H])N(C([H])([H])[H])C([H])([H])C2([H])C([H])([H])C2([H])[H])[C@@]([H])(C([H])([H])[H])C1([H])[H])C([H])([H])[H]	0 (Inactive)	0	0	0
1309	PUBCHEM_CID_44484174	[H]OC([H])([H])[C@@]([H])(N1C(=O)c2c([H])c(N([H])S(=O)(=O)c3c(noc3C([H])([H])[H])C([H])([H])[H])c([H])c([H])c2O[C@@]([H])(C([H])([H])N(C([H])([H])[H])S(=O)(=O)c2c([H])c([H])c(OC([H])([H])[H])c([H])c2[H])[C@@]([H])(C([H])([H])[H])C1([H])[H])C([H])([H])[H]	0 (Inactive)	0	0	0
1310	PUBCHEM_CID_44484175	[H]OC([H])([H])[C@]([H])(N1C(=O)c2c([H])c(N([H])C(=O)c3c([H])c([H])nc([H])c3[H])c([H])c([H])c2O[C@]([H])(C([H])([H])N(C(=O)N([H])C([H])(C([H])([H])[H])C([H])([H])[H])C([H])([H])[H])[C@]([H])(C([H])([H])[H])C1([H])[H])C([H])([H])[H]	0 (Inactive)	0	0	0
1311	PUBCHEM_CID_44484176	[H]OC([H])([H])[C@@]([H])(N1C(=O)c2c([H])c(N([H])C(=O)C([H])([H])C([H])([H])N3C([H])([H])C([H])([H])OC([H])([H])C3([H])[H])c([H])c([H])c2O[C@@]([H])(C([H])([H])N(C([H])([H])[H])C([H])([H])c2c([H])c([H])c([H])c([H])c2[H])[C@@]([H])(C([H])([H])[H])C1([H])[H])C([H])([H])[H]	0 (Inactive)	0	0	0
1312	PUBCHEM_CID_44484177	[H]OC([H])([H])[C@@]([H])(N1C(=O)c2c([H])c(N([H])S(=O)(=O)c3c([H])c([H])c(F)c([H])c3[H])c([H])c([H])c2O[C@@]([H])(C([H])([H])N(C([H])([H])[H])C([H])([H])c2c([H])c([H])c(c([H])c2[H])C(F)(F)F)[C@@]([H])(C([H])([H])[H])C1([H])[H])C([H])([H])[H]	0 (Inactive)	0	0	0
1313	PUBCHEM_CID_44484178	[H]OC([H])([H])[C@]([H])(N1C(=O)c2c([H])c(N([H])C(=O)N([H])C([H])(C([H])([H])[H])C([H])([H])[H])c([H])c([H])c2O[C@]([H])(C([H])([H])N(C([H])([H])[H])C([H])([H])c2c([H])c([H])c3OC([H])([H])Oc3c2[H])[C@]([H])(C([H])([H])[H])C1([H])[H])C([H])([H])[H]	0 (Inactive)	0	0	0
1314	PUBCHEM_CID_44484179	[H]OC([H])([H])[C@]([H])(N1C(=O)c2c([H])c(N([H])S(=O)(=O)c3c([H])c([H])c(Cl)c([H])c3[H])c([H])c([H])c2O[C@]([H])(C([H])([H])N(C(=O)N([H])c2c([H])c([H])c([H])c([H])c2[H])C([H])([H])[H])[C@]([H])(C([H])([H])[H])C1([H])[H])C([H])([H])[H]	0 (Inactive)	0	0	0
1316	PUBCHEM_CID_44484181	[H]OC([H])([H])[C@@]([H])(N1C(=O)c2c([H])c(N([H])C(=O)N([H])c3c([H])c([H])c([H])c([H])c3[H])c([H])c([H])c2O[C@@]([H])(C([H])([H])N(C([H])([H])[H])C([H])([H])c2c([H])c([H])c3OC([H])([H])Oc3c2[H])[C@@]([H])(C([H])([H])[H])C1([H])[H])C([H])([H])[H]	0 (Inactive)	0	0	0
1317	PUBCHEM_CID_44484182	[H]OC([H])([H])[C@@]([H])(N1C(=O)c2c([H])c(N([H])C(=O)N([H])c3c([H])c([H])c([H])c([H])c3[H])c([H])c([H])c2O[C@@]([H])(C([H])([H])N(C([H])([H])[H])C([H])([H])c2c([H])c([H])c([H])c([H])c2[H])[C@@]([H])(C([H])([H])[H])C1([H])[H])C([H])([H])[H]	0 (Inactive)	0	0	0
1318	PUBCHEM_CID_44484183	[H]OC([H])([H])[C@@]([H])(N1C(=O)c2c([H])c(N([H])S(=O)(=O)c3c([H])c([H])c(c([H])c3[H])C([H])([H])[H])c([H])c([H])c2O[C@@]([H])(C([H])([H])N(C(=O)N([H])c2c([H])c([H])c(F)c([H])c2[H])C([H])([H])[H])[C@@]([H])(C([H])([H])[H])C1([H])[H])C([H])([H])[H]	0 (Inactive)	0	0	0
1319	PUBCHEM_CID_44484184	[H]OC([H])([H])[C@]([H])(N1C(=O)c2c([H])c(N([H])C(=O)c3c([H])c([H])nc([H])c3[H])c([H])c([H])c2O[C@]([H])(C([H])([H])N(C([H])([H])[H])C([H])([H])C2([H])C([H])([H])C([H])([H])C([H])([H])C([H])([H])C2([H])[H])[C@]([H])(C([H])([H])[H])C1([H])[H])C([H])([H])[H]	0 (Inactive)	0	0	0
1320	PUBCHEM_CID_44484185	[H]OC([H])([H])[C@]([H])(N1C(=O)c2c([H])c(N([H])C(=O)N([H])c3c([H])c([H])c(OC([H])([H])[H])c([H])c3[H])c([H])c([H])c2O[C@]([H])(C([H])([H])N(C([H])([H])[H])C([H])([H])c2c([H])c([H])c3OC([H])([H])Oc3c2[H])[C@]([H])(C([H])([H])[H])C1([H])[H])C([H])([H])[H]	0 (Inactive)	0	0	0
1321	PUBCHEM_CID_44484186	[H]OC([H])([H])[C@@]([H])(N1C(=O)c2c([H])c(N([H])C(=O)C3([H])C([H])([H])C([H])([H])C([H])([H])C([H])([H])C3([H])[H])c([H])c([H])c2O[C@@]([H])(C([H])([H])N(C(=O)N([H])c2c([H])c([H])c([H])c3c([H])c([H])c([H])c([H])c23)C([H])([H])[H])[C@@]([H])(C([H])([H])[H])C1([H])[H])C([H])([H])[H]	0 (Inactive)	0	0	0
1322	PUBCHEM_CID_44484187	[H]OC([H])([H])[C@@]([H])(N1C(=O)c2c([H])c(N([H])C(=O)C([H])([H])C([H])([H])C(F)(F)F)c([H])c([H])c2O[C@@]([H])(C([H])([H])N(C([H])([H])[H])C([H])([H])c2c([H])c([H])c3OC([H])([H])Oc3c2[H])[C@@]([H])(C([H])([H])[H])C1([H])[H])C([H])([H])[H]	0 (Inactive)	0	0	0
1323	PUBCHEM_CID_44484188	[H]OC([H])([H])[C@@]([H])(N1C(=O)c2c([H])c(N([H])C(=O)c3c([H])c([H])nc([H])c3[H])c([H])c([H])c2O[C@@]([H])(C([H])([H])N(C([H])([H])[H])S(=O)(=O)c2c([H])c([H])c(OC([H])([H])[H])c([H])c2[H])[C@@]([H])(C([H])([H])[H])C1([H])[H])C([H])([H])[H]	0 (Inactive)	0	0	0
1324	PUBCHEM_CID_44484189	[H]OC([H])([H])[C@@]([H])(N1C(=O)c2c([H])c(N([H])S(=O)(=O)c3c([H])c([H])c([H])c([H])c3[H])c([H])c([H])c2O[C@@]([H])(C([H])([H])N(C([H])([H])[H])C([H])([H])c2c([H])c([H])c(c([H])c2[H])C(F)(F)F)[C@@]([H])(C([H])([H])[H])C1([H])[H])C([H])([H])[H]	0 (Inactive)	0	0	0
1325	PUBCHEM_CID_44484190	[H]OC([H])([H])[C@]([H])(N1C(=O)c2c([H])c(N([H])C(=O)C3([H])C([H])([H])C([H])([H])C([H])([H])C([H])([H])C3([H])[H])c([H])c([H])c2O[C@]([H])(C([H])([H])N(C([H])([H])[H])C([H])([H])c2c([H])c([H])c(Oc3c([H])c([H])c([H])c([H])c3[H])c([H])c2[H])[C@]([H])(C([H])([H])[H])C1([H])[H])C([H])([H])[H]	0 (Inactive)	0	0	0
1326	PUBCHEM_CID_44484191	[H]OC([H])([H])[C@@]([H])(N1C(=O)c2c([H])c(N([H])S(=O)(=O)c3sc([H])c([H])c3[H])c([H])c([H])c2O[C@@]([H])(C([H])([H])N(C([H])([H])[H])C([H])([H])c2c([H])c([H])c(c([H])c2[H])C(F)(F)F)[C@@]([H])(C([H])([H])[H])C1([H])[H])C([H])([H])[H]	0 (Inactive)	0	0	0
1327	PUBCHEM_CID_44484192	[H]OC([H])([H])[C@@]([H])(N1C(=O)c2c([H])c(N([H])C(=O)N([H])c3c([H])c([H])c([H])c4c([H])c([H])c([H])c([H])c34)c([H])c([H])c2O[C@@]([H])(C([H])([H])N(C([H])([H])[H])C([H])([H])c2c([H])c([H])c(c([H])c2[H])-c2c([H])c([H])c([H])c([H])c2[H])[C@@]([H])(C([H])([H])[H])C1([H])[H])C([H])([H])[H]	0 (Inactive)	0	0	0
1328	PUBCHEM_CID_44484193	[H]OC([H])([H])[C@@]([H])(N1C(=O)c2c([H])c(N([H])S(=O)(=O)C([H])([H])[H])c([H])c([H])c2O[C@@]([H])(C([H])([H])N(C([H])([H])[H])C([H])([H])c2c([H])c([H])c(Cl)c(Cl)c2[H])[C@@]([H])(C([H])([H])[H])C1([H])[H])C([H])([H])[H]	0 (Inactive)	0	0	0
1329	PUBCHEM_CID_44484194	[H]OC([H])([H])[C@@]([H])(N1C(=O)c2c([H])c(N([H])S(=O)(=O)c3nc([H])n(c3[H])C([H])([H])[H])c([H])c([H])c2O[C@@]([H])(C([H])([H])N(C([H])([H])[H])C([H])([H])c2c([H])c([H])c(Oc3c([H])c([H])c([H])c([H])c3[H])c([H])c2[H])[C@@]([H])(C([H])([H])[H])C1([H])[H])C([H])([H])[H]	0 (Inactive)	0	0	0
1330	PUBCHEM_CID_44484195	[H]OC([H])([H])[C@@]([H])(N1C(=O)c2c([H])c(N([H])S(=O)(=O)c3sc([H])c([H])c3[H])c([H])c([H])c2O[C@@]([H])(C([H])([H])N(C([H])([H])[H])C([H])([H])c2c([H])c([H])c(Cl)c(Cl)c2[H])[C@@]([H])(C([H])([H])[H])C1([H])[H])C([H])([H])[H]	0 (Inactive)	0	0	0
1331	PUBCHEM_CID_44484196	[H]OC([H])([H])[C@@]([H])(N1C(=O)c2c([H])c(N([H])S(=O)(=O)c3c([H])c([H])c(F)c([H])c3[H])c([H])c([H])c2O[C@@]([H])(C([H])([H])N(C([H])([H])[H])C([H])([H])c2c([H])c([H])c(c([H])c2[H])-c2c([H])c([H])c([H])c([H])c2[H])[C@@]([H])(C([H])([H])[H])C1([H])[H])C([H])([H])[H]	0 (Inactive)	0	0	0
1333	PUBCHEM_CID_44484198	[H]OC([H])([H])[C@@]([H])(N1C(=O)c2c([H])c(N([H])S(=O)(=O)c3nc([H])n(c3[H])C([H])([H])[H])c([H])c([H])c2O[C@@]([H])(C([H])([H])N(C([H])([H])[H])C([H])([H])c2c([H])c([H])c3OC([H])([H])Oc3c2[H])[C@@]([H])(C([H])([H])[H])C1([H])[H])C([H])([H])[H]	0 (Inactive)	0	0	0
1334	PUBCHEM_CID_44484199	[H]OC([H])([H])[C@@]([H])(N1C(=O)c2c([H])c(N([H])C(=O)N([H])c3c(noc3C([H])([H])[H])C([H])([H])[H])c([H])c([H])c2O[C@@]([H])(C([H])([H])N(C([H])([H])[H])C([H])([H])c2c([H])c([H])c(Oc3c([H])c([H])c([H])c([H])c3[H])c([H])c2[H])[C@@]([H])(C([H])([H])[H])C1([H])[H])C([H])([H])[H]	0 (Inactive)	0	0	0
1335	PUBCHEM_CID_44484200	[H]OC([H])([H])[C@@]([H])(N1C(=O)c2c([H])c(N([H])C(=O)N([H])c3c([H])c([H])c4OC([H])([H])Oc4c3[H])c([H])c([H])c2O[C@@]([H])(C([H])([H])N(C([H])([H])[H])C([H])([H])[H])[C@@]([H])(C([H])([H])[H])C1([H])[H])C([H])([H])[H]	0 (Inactive)	0	0	0
1336	PUBCHEM_CID_44484201	[H]OC([H])([H])[C@@]([H])(N1C(=O)c2c([H])c(c([H])c([H])c2O[C@@]([H])(C([H])([H])N(C(=O)N([H])C2([H])C([H])([H])C([H])([H])C([H])([H])C([H])([H])C2([H])[H])C([H])([H])[H])[C@@]([H])(C([H])([H])[H])C1([H])[H])N(C([H])([H])[H])C([H])([H])[H])C([H])([H])[H]	0 (Inactive)	0	0	0
1337	PUBCHEM_CID_44484202	[H]OC([H])([H])[C@@]([H])(N1C(=O)c2c([H])c(N([H])C(=O)C([H])([H])c3c([H])n(c4c([H])c([H])c([H])c([H])c34)C([H])([H])[H])c([H])c([H])c2O[C@@]([H])(C([H])([H])N(C([H])([H])[H])C([H])([H])c2c([H])c([H])c(c([H])c2[H])C(F)(F)F)[C@@]([H])(C([H])([H])[H])C1([H])[H])C([H])([H])[H]	0 (Inactive)	0	0	0
1338	PUBCHEM_CID_44484203	[H]OC([H])([H])[C@@]([H])(N1C(=O)c2c([H])c(N([H])C(=O)c3c([H])c([H])nc([H])c3[H])c([H])c([H])c2O[C@@]([H])(C([H])([H])N(C([H])([H])[H])S(=O)(=O)c2c([H])c([H])c(F)c([H])c2[H])[C@@]([H])(C([H])([H])[H])C1([H])[H])C([H])([H])[H]	0 (Inactive)	0	0	0
1339	PUBCHEM_CID_44484204	[H]OC([H])([H])[C@@]([H])(N1C(=O)c2c([H])c(N([H])S(=O)(=O)c3c([H])c([H])c(Cl)c([H])c3[H])c([H])c([H])c2O[C@@]([H])(C([H])([H])N(C([H])([H])[H])C([H])([H])C2([H])C([H])([H])C2([H])[H])[C@@]([H])(C([H])([H])[H])C1([H])[H])C([H])([H])[H]	0 (Inactive)	0	0	0
1340	PUBCHEM_CID_44484205	[H]OC([H])([H])[C@@]([H])(N1C(=O)c2c([H])c(N([H])S(=O)(=O)c3nc([H])n(c3[H])C([H])([H])[H])c([H])c([H])c2O[C@@]([H])(C([H])([H])N(C([H])([H])[H])C([H])([H])c2c([H])c([H])c([H])c([H])c2[H])[C@@]([H])(C([H])([H])[H])C1([H])[H])C([H])([H])[H]	0 (Inactive)	0	0	0
1341	PUBCHEM_CID_44484206	[H]OC([H])([H])[C@@]([H])(N1C(=O)c2c([H])c(c([H])c([H])c2O[C@@]([H])(C([H])([H])N(C(=O)N([H])c2c([H])c([H])c(OC([H])([H])[H])c([H])c2[H])C([H])([H])[H])[C@@]([H])(C([H])([H])[H])C1([H])[H])N(C([H])([H])[H])C([H])([H])[H])C([H])([H])[H]	0 (Inactive)	0	0	0
1342	PUBCHEM_CID_44484207	[H]OC([H])([H])[C@@]([H])(N1C(=O)c2c([H])c(N([H])S(=O)(=O)c3c([H])c([H])c(c([H])c3[H])C([H])([H])[H])c([H])c([H])c2O[C@@]([H])(C([H])([H])N(C(=O)N([H])c2c([H])c([H])c([H])c([H])c2[H])C([H])([H])[H])[C@@]([H])(C([H])([H])[H])C1([H])[H])C([H])([H])[H]	0 (Inactive)	0	0	0
1343	PUBCHEM_CID_44484208	[H]OC([H])([H])[C@@]([H])(N1C(=O)c2c([H])c(N([H])C(=O)N([H])c3c([H])c([H])c4OC([H])([H])Oc4c3[H])c([H])c([H])c2O[C@@]([H])(C([H])([H])N(C([H])([H])[H])C([H])([H])c2c([H])c([H])c([H])c([H])c2[H])[C@@]([H])(C([H])([H])[H])C1([H])[H])C([H])([H])[H]	0 (Inactive)	0	0	0
1344	PUBCHEM_CID_44484209	[H]OC([H])([H])[C@@]([H])(N1C(=O)c2c([H])c(N([H])C(=O)c3c([H])c([H])nc([H])c3[H])c([H])c([H])c2O[C@@]([H])(C([H])([H])N(C(=O)N([H])c2c([H])c([H])c([H])c3c([H])c([H])c([H])c([H])c23)C([H])([H])[H])[C@@]([H])(C([H])([H])[H])C1([H])[H])C([H])([H])[H]	0 (Inactive)	0	0	0
1345	PUBCHEM_CID_44484210	[H]OC([H])([H])[C@@]([H])(N1C(=O)c2c([H])c(N([H])C(=O)N([H])c3c([H])c([H])c(F)c([H])c3[H])c([H])c([H])c2O[C@@]([H])(C([H])([H])N(C([H])([H])[H])C([H])([H])c2c([H])c([H])c(OC([H])([H])[H])c([H])c2[H])[C@@]([H])(C([H])([H])[H])C1([H])[H])C([H])([H])[H]	0 (Inactive)	0	0	0
1346	PUBCHEM_CID_44484211	[H]OC([H])([H])[C@@]([H])(N1C(=O)c2c([H])c(N([H])S(=O)(=O)c3c(noc3C([H])([H])[H])C([H])([H])[H])c([H])c([H])c2O[C@@]([H])(C([H])([H])N(C(=O)N([H])c2c([H])c([H])c(OC([H])([H])[H])c([H])c2[H])C([H])([H])[H])[C@@]([H])(C([H])([H])[H])C1([H])[H])C([H])([H])[H]	0 (Inactive)	0	0	0
1347	PUBCHEM_CID_44484212	[H]OC([H])([H])[C@@]([H])(N1C(=O)c2c([H])c(N([H])S(=O)(=O)c3c([H])c([H])c(c([H])c3[H])C([H])([H])[H])c([H])c([H])c2O[C@@]([H])(C([H])([H])N(C([H])([H])[H])C([H])([H])c2c([H])c([H])c([H])c([H])c2[H])[C@@]([H])(C([H])([H])[H])C1([H])[H])C([H])([H])[H]	0 (Inactive)	0	0	0
1348	PUBCHEM_CID_44484213	[H]OC([H])([H])[C@@]([H])(N1C(=O)c2c([H])c(c([H])c([H])c2O[C@@]([H])(C([H])([H])N([H])C([H])([H])[H])[C@@]([H])(C([H])([H])[H])C1([H])[H])N(C([H])([H])[H])C([H])([H])[H])C([H])([H])[H]	0 (Inactive)	0	0	0
1349	PUBCHEM_CID_44484214	[H]OC([H])([H])[C@@]([H])(N1C(=O)c2c([H])c(N([H])S(=O)(=O)c3c([H])c([H])c([H])c([H])c3[H])c([H])c([H])c2O[C@@]([H])(C([H])([H])N(C([H])([H])[H])C([H])([H])c2c([H])c([H])c3OC([H])([H])Oc3c2[H])[C@@]([H])(C([H])([H])[H])C1([H])[H])C([H])([H])[H]	0 (Inactive)	0	0	0
1350	PUBCHEM_CID_44484215	[H]OC([H])([H])[C@@]([H])(N1C(=O)c2c([H])c(N([H])S(=O)(=O)c3nc([H])n(c3[H])C([H])([H])[H])c([H])c([H])c2O[C@@]([H])(C([H])([H])N(C([H])([H])[H])C([H])([H])C2([H])C([H])([H])C([H])([H])C([H])([H])C([H])([H])C2([H])[H])[C@@]([H])(C([H])([H])[H])C1([H])[H])C([H])([H])[H]	0 (Inactive)	0	0	0
1351	PUBCHEM_CID_44484216	[H]OC([H])([H])[C@@]([H])(N1C(=O)c2c([H])c(N([H])S(=O)(=O)c3nc([H])n(c3[H])C([H])([H])[H])c([H])c([H])c2O[C@@]([H])(C([H])([H])N(C([H])([H])[H])C([H])([H])c2c([H])c([H])c(Cl)c(Cl)c2[H])[C@@]([H])(C([H])([H])[H])C1([H])[H])C([H])([H])[H]	0 (Inactive)	0	0	0
1352	PUBCHEM_CID_44484217	[H]OC([H])([H])[C@@]([H])(N1C(=O)c2c([H])c(N([H])S(=O)(=O)c3c(noc3C([H])([H])[H])C([H])([H])[H])c([H])c([H])c2O[C@@]([H])(C([H])([H])N(C([H])([H])[H])S(=O)(=O)c2c([H])c([H])c(Cl)c([H])c2[H])[C@@]([H])(C([H])([H])[H])C1([H])[H])C([H])([H])[H]	0 (Inactive)	0	0	0
1353	PUBCHEM_CID_44484218	[H]OC([H])([H])[C@@]([H])(N1C(=O)c2c([H])c(N([H])C(=O)N([H])c3c([H])c([H])c([H])c([H])c3[H])c([H])c([H])c2O[C@@]([H])(C([H])([H])N(C(=O)N([H])c2c([H])c([H])c(OC([H])([H])[H])c([H])c2[H])C([H])([H])[H])[C@@]([H])(C([H])([H])[H])C1([H])[H])C([H])([H])[H]	0 (Inactive)	0	0	0
1354	PUBCHEM_CID_44484219	[H]OC([H])([H])[C@@]([H])(N1C(=O)c2c([H])c(N([H])C(=O)N([H])C([H])(C([H])([H])[H])C([H])([H])[H])c([H])c([H])c2O[C@@]([H])(C([H])([H])N(C([H])([H])[H])C([H])([H])c2c([H])c([H])c3OC([H])([H])Oc3c2[H])[C@@]([H])(C([H])([H])[H])C1([H])[H])C([H])([H])[H]	0 (Inactive)	0	0	0
1355	PUBCHEM_CID_44484220	[H]OC([H])([H])[C@@]([H])(N1C(=O)c2c([H])c(N([H])C(=O)N([H])C([H])(C([H])([H])[H])C([H])([H])[H])c([H])c([H])c2O[C@@]([H])(C([H])([H])N(C(=O)N([H])c2c([H])c([H])c([H])c3c([H])c([H])c([H])c([H])c23)C([H])([H])[H])[C@@]([H])(C([H])([H])[H])C1([H])[H])C([H])([H])[H]	0 (Inactive)	0	0	0
1356	PUBCHEM_CID_44484221	[H]OC([H])([H])[C@@]([H])(N1C(=O)c2c([H])c(N([H])C(=O)N([H])C3([H])C([H])([H])C([H])([H])C([H])([H])C([H])([H])C3([H])[H])c([H])c([H])c2O[C@@]([H])(C([H])([H])N(C([H])([H])[H])C([H])([H])c2c([H])c([H])c([H])c([H])c2[H])[C@@]([H])(C([H])([H])[H])C1([H])[H])C([H])([H])[H]	0 (Inactive)	0	0	0
1357	PUBCHEM_CID_44484222	[H]OC([H])([H])[C@@]([H])(N1C(=O)c2c([H])c(N([H])S(=O)(=O)c3c([H])c([H])c(OC([H])([H])[H])c([H])c3[H])c([H])c([H])c2O[C@@]([H])(C([H])([H])N(C([H])([H])[H])C([H])([H])c2c([H])c([H])c(c([H])c2[H])-c2c([H])c([H])c([H])c([H])c2[H])[C@@]([H])(C([H])([H])[H])C1([H])[H])C([H])([H])[H]	0 (Inactive)	0	0	0
1358	PUBCHEM_CID_44484223	[H]OC([H])([H])[C@@]([H])(N1C(=O)c2c([H])c(N([H])S(=O)(=O)c3c([H])c([H])c(Cl)c([H])c3[H])c([H])c([H])c2O[C@@]([H])(C([H])([H])N(C(=O)N([H])c2c([H])c([H])c(F)c([H])c2[H])C([H])([H])[H])[C@@]([H])(C([H])([H])[H])C1([H])[H])C([H])([H])[H]	0 (Inactive)	0	0	0
1359	PUBCHEM_CID_44484224	[H]OC([H])([H])[C@@]([H])(N1C(=O)c2c([H])c(N([H])C(=O)c3c([H])c([H])nc([H])c3[H])c([H])c([H])c2O[C@@]([H])(C([H])([H])N(C([H])([H])[H])S(=O)(=O)c2c([H])c([H])c(c([H])c2[H])C([H])([H])[H])[C@@]([H])(C([H])([H])[H])C1([H])[H])C([H])([H])[H]	0 (Inactive)	0	0	0
1360	PUBCHEM_CID_44484225	[H]OC([H])([H])[C@@]([H])(N1C(=O)c2c([H])c(N([H])C(=O)N([H])c3c([H])c([H])c(OC([H])([H])[H])c([H])c3[H])c([H])c([H])c2O[C@@]([H])(C([H])([H])N(C([H])([H])[H])C([H])([H])c2c([H])c([H])c(c([H])c2[H])-c2c([H])c([H])c([H])c([H])c2[H])[C@@]([H])(C([H])([H])[H])C1([H])[H])C([H])([H])[H]	0 (Inactive)	0	0	0
1361	PUBCHEM_CID_44484226	[H]OC([H])([H])[C@@]([H])(N1C(=O)c2c([H])c(N([H])S(=O)(=O)c3c([H])c([H])c(F)c([H])c3[H])c([H])c([H])c2O[C@@]([H])(C([H])([H])N(C([H])([H])[H])C([H])([H])c2c([H])c([H])c(Oc3c([H])c([H])c([H])c([H])c3[H])c([H])c2[H])[C@@]([H])(C([H])([H])[H])C1([H])[H])C([H])([H])[H]	0 (Inactive)	0	0	0
1362	PUBCHEM_CID_44484227	[H]OC([H])([H])[C@@]([H])(N1C(=O)c2c([H])c(N([H])S(=O)(=O)c3c([H])c([H])c(F)c([H])c3[H])c([H])c([H])c2O[C@@]([H])(C([H])([H])N(C(=O)N([H])c2c([H])c([H])c3OC([H])([H])Oc3c2[H])C([H])([H])[H])[C@@]([H])(C([H])([H])[H])C1([H])[H])C([H])([H])[H]	0 (Inactive)	0	0	0
1363	PUBCHEM_CID_44484228	[H]OC([H])([H])[C@@]([H])(N1C(=O)c2c([H])c(N([H])S(=O)(=O)c3c([H])c([H])c([H])c([H])c3[H])c([H])c([H])c2O[C@@]([H])(C([H])([H])N(C([H])([H])[H])C([H])([H])c2c([H])c([H])c([H])c([H])c2[H])[C@@]([H])(C([H])([H])[H])C1([H])[H])C([H])([H])[H]	0 (Inactive)	0	0	0
1364	PUBCHEM_CID_44484229	[H]OC([H])([H])[C@@]([H])(N1C(=O)c2c([H])c(N([H])C(=O)C3([H])C([H])([H])C3([H])[H])c([H])c([H])c2O[C@@]([H])(C([H])([H])N(C([H])([H])[H])C([H])([H])c2c([H])c([H])c(c([H])c2[H])-c2c([H])c([H])c([H])c([H])c2[H])[C@@]([H])(C([H])([H])[H])C1([H])[H])C([H])([H])[H]	0 (Inactive)	0	0	0
1365	PUBCHEM_CID_44484230	[H]OC([H])([H])[C@@]([H])(N1C(=O)c2c([H])c(N([H])C(=O)C([H])([H])C([H])([H])C(F)(F)F)c([H])c([H])c2O[C@@]([H])(C([H])([H])N(C(=O)N([H])c2c([H])c([H])c([H])c3c([H])c([H])c([H])c([H])c23)C([H])([H])[H])[C@@]([H])(C([H])([H])[H])C1([H])[H])C([H])([H])[H]	0 (Inactive)	0	0	0
1366	PUBCHEM_CID_44484231	[H]OC([H])([H])[C@@]([H])(N1C(=O)c2c([H])c(N([H])S(=O)(=O)c3c([H])c([H])c([H])c([H])c3[H])c([H])c([H])c2O[C@@]([H])(C([H])([H])N(C([H])([H])[H])C([H])([H])c2c([H])c([H])c(Oc3c([H])c([H])c([H])c([H])c3[H])c([H])c2[H])[C@@]([H])(C([H])([H])[H])C1([H])[H])C([H])([H])[H]	0 (Inactive)	0	0	0
1367	PUBCHEM_CID_44484232	[H]OC([H])([H])[C@@]([H])(N1C(=O)c2c([H])c(N([H])S(=O)(=O)c3c([H])c([H])c([H])c([H])c3[H])c([H])c([H])c2O[C@@]([H])(C([H])([H])N(C(=O)N([H])C([H])(C([H])([H])[H])C([H])([H])[H])C([H])([H])[H])[C@@]([H])(C([H])([H])[H])C1([H])[H])C([H])([H])[H]	0 (Inactive)	0	0	0
1368	PUBCHEM_CID_44484233	[H]OC([H])([H])[C@@]([H])(N1C(=O)c2c([H])c(N([H])C(=O)C([H])([H])c3c([H])c([H])c([H])c([H])c3[H])c([H])c([H])c2O[C@@]([H])(C([H])([H])N(C([H])([H])[H])C([H])([H])c2c([H])c([H])nc([H])c2[H])[C@@]([H])(C([H])([H])[H])C1([H])[H])C([H])([H])[H]	0 (Inactive)	0	0	0
1369	PUBCHEM_CID_44484234	[H]OC([H])([H])[C@@]([H])(N1C(=O)c2c([H])c(N([H])C(=O)N([H])c3c([H])c([H])c(OC([H])([H])[H])c([H])c3[H])c([H])c([H])c2O[C@@]([H])(C([H])([H])N(C(=O)N([H])c2c([H])c([H])c([H])c3c([H])c([H])c([H])c([H])c23)C([H])([H])[H])[C@@]([H])(C([H])([H])[H])C1([H])[H])C([H])([H])[H]	0 (Inactive)	0	0	0
1370	PUBCHEM_CID_44484235	[H]OC([H])([H])[C@@]([H])(N1C(=O)c2c([H])c(N([H])C(=O)N([H])C([H])(C([H])([H])[H])C([H])([H])[H])c([H])c([H])c2O[C@@]([H])(C([H])([H])N(C([H])([H])[H])C([H])([H])c2c([H])c([H])c([H])c([H])c2[H])[C@@]([H])(C([H])([H])[H])C1([H])[H])C([H])([H])[H]	0 (Inactive)	0	0	0
1371	PUBCHEM_CID_44484236	[H]OC([H])([H])[C@@]([H])(N1C(=O)c2c([H])c(N([H])S(=O)(=O)c3c([H])c([H])c(c([H])c3[H])C([H])([H])[H])c([H])c([H])c2O[C@@]([H])(C([H])([H])N(C(=O)N([H])c2c([H])c([H])c([H])c3c([H])c([H])c([H])c([H])c23)C([H])([H])[H])[C@@]([H])(C([H])([H])[H])C1([H])[H])C([H])([H])[H]	0 (Inactive)	0	0	0
1372	PUBCHEM_CID_44484237	[H]OC([H])([H])[C@@]([H])(N1C(=O)c2c([H])c(N([H])S(=O)(=O)c3c([H])c([H])c(F)c([H])c3[H])c([H])c([H])c2O[C@@]([H])(C([H])([H])N(C([H])([H])[H])S(=O)(=O)c2c([H])c([H])c(Cl)c([H])c2[H])[C@@]([H])(C([H])([H])[H])C1([H])[H])C([H])([H])[H]	0 (Inactive)	0	0	0
1373	PUBCHEM_CID_44484238	[H]OC([H])([H])[C@@]([H])(N1C(=O)c2c([H])c(N([H])S(=O)(=O)c3c([H])c([H])c(Cl)c([H])c3[H])c([H])c([H])c2O[C@@]([H])(C([H])([H])N(C([H])([H])[H])S(=O)(=O)c2c([H])c([H])c(c([H])c2[H])C([H])([H])[H])[C@@]([H])(C([H])([H])[H])C1([H])[H])C([H])([H])[H]	0 (Inactive)	0	0	0
1374	PUBCHEM_CID_44484239	[H]OC([H])([H])[C@@]([H])(N1C(=O)c2c([H])c(N([H])C(=O)C([H])([H])c3c([H])n(c4c([H])c([H])c([H])c([H])c34)C([H])([H])[H])c([H])c([H])c2O[C@@]([H])(C([H])([H])N(C([H])([H])[H])C([H])([H])c2c([H])c([H])c(c([H])c2[H])-c2c([H])c([H])c([H])c([H])c2[H])[C@@]([H])(C([H])([H])[H])C1([H])[H])C([H])([H])[H]	0 (Inactive)	0	0	0
1375	PUBCHEM_CID_44484240	[H]OC([H])([H])[C@@]([H])(N1C(=O)c2c([H])c(N([H])S(=O)(=O)c3c([H])c([H])c(OC([H])([H])[H])c([H])c3[H])c([H])c([H])c2O[C@@]([H])(C([H])([H])N(C([H])([H])[H])C([H])([H])c2c([H])c([H])c3OC([H])([H])Oc3c2[H])[C@@]([H])(C([H])([H])[H])C1([H])[H])C([H])([H])[H]	0 (Inactive)	0	0	0
1376	PUBCHEM_CID_44484241	[H]OC([H])([H])[C@@]([H])(N1C(=O)c2c([H])c(N([H])S(=O)(=O)C([H])([H])[H])c([H])c([H])c2O[C@@]([H])(C([H])([H])N(C(=O)N([H])c2c([H])c([H])c3OC([H])([H])Oc3c2[H])C([H])([H])[H])[C@@]([H])(C([H])([H])[H])C1([H])[H])C([H])([H])[H]	0 (Inactive)	0	0	0
1377	PUBCHEM_CID_44484242	[H]OC([H])([H])[C@@]([H])(N1C(=O)c2c([H])c(N([H])S(=O)(=O)C([H])([H])[H])c([H])c([H])c2O[C@@]([H])(C([H])([H])N(C([H])([H])[H])C([H])([H])c2c([H])c([H])c(Oc3c([H])c([H])c([H])c([H])c3[H])c([H])c2[H])[C@@]([H])(C([H])([H])[H])C1([H])[H])C([H])([H])[H]	0 (Inactive)	0	0	0
1378	PUBCHEM_CID_44484243	[H]OC([H])([H])[C@@]([H])(N1C(=O)c2c([H])c(N([H])S(=O)(=O)c3c(noc3C([H])([H])[H])C([H])([H])[H])c([H])c([H])c2O[C@@]([H])(C([H])([H])N(C([H])([H])[H])S(=O)(=O)c2c([H])c([H])c(F)c([H])c2[H])[C@@]([H])(C([H])([H])[H])C1([H])[H])C([H])([H])[H]	0 (Inactive)	0	0	0
1379	PUBCHEM_CID_44484244	[H]OC([H])([H])[C@@]([H])(N1C(=O)c2c([H])c(N([H])C(=O)C([H])([H])c3c([H])c([H])c([H])c([H])c3[H])c([H])c([H])c2O[C@@]([H])(C([H])([H])N(C(=O)N([H])c2c([H])c([H])c3OC([H])([H])Oc3c2[H])C([H])([H])[H])[C@@]([H])(C([H])([H])[H])C1([H])[H])C([H])([H])[H]	0 (Inactive)	0	0	0
1380	PUBCHEM_CID_44484245	[H]OC([H])([H])[C@@]([H])(N1C(=O)c2c([H])c(N([H])C(=O)C([H])([H])C([H])([H])C([H])([H])N(C([H])([H])[H])C([H])([H])[H])c([H])c([H])c2O[C@@]([H])(C([H])([H])N(C([H])([H])[H])C([H])([H])c2c([H])c([H])c3OC([H])([H])Oc3c2[H])[C@@]([H])(C([H])([H])[H])C1([H])[H])C([H])([H])[H]	0 (Inactive)	0	0	0
1381	PUBCHEM_CID_44484246	[H]OC([H])([H])[C@@]([H])(N1C(=O)c2c([H])c(N([H])C(=O)N([H])c3c([H])c([H])c4OC([H])([H])Oc4c3[H])c([H])c([H])c2O[C@@]([H])(C([H])([H])N(C([H])([H])[H])C([H])([H])C2([H])C([H])([H])C([H])([H])C([H])([H])C([H])([H])C2([H])[H])[C@@]([H])(C([H])([H])[H])C1([H])[H])C([H])([H])[H]	0 (Inactive)	0	0	0
1382	PUBCHEM_CID_44484247	[H]OC([H])([H])[C@@]([H])(N1C(=O)c2c([H])c(N([H])C(=O)C([H])([H])C([H])([H])N3C([H])([H])C([H])([H])OC([H])([H])C3([H])[H])c([H])c([H])c2O[C@@]([H])(C([H])([H])N(C([H])([H])[H])C([H])([H])c2c([H])c([H])c3OC([H])([H])Oc3c2[H])[C@@]([H])(C([H])([H])[H])C1([H])[H])C([H])([H])[H]	0 (Inactive)	0	0	0
1383	PUBCHEM_CID_44484248	[H]OC([H])([H])[C@@]([H])(N1C(=O)c2c([H])c(N([H])C(=O)C([H])([H])n3nnnc3[H])c([H])c([H])c2O[C@@]([H])(C([H])([H])N(C(=O)N([H])c2c([H])c([H])c3OC([H])([H])Oc3c2[H])C([H])([H])[H])[C@@]([H])(C([H])([H])[H])C1([H])[H])C([H])([H])[H]	0 (Inactive)	0	0	0
1384	PUBCHEM_CID_44484249	[H]OC([H])([H])[C@@]([H])(N1C(=O)c2c([H])c(N([H])C(=O)c3c([H])c([H])nc([H])c3[H])c([H])c([H])c2O[C@@]([H])(C([H])([H])N(C([H])([H])[H])C([H])([H])c2c([H])c([H])c3OC([H])([H])Oc3c2[H])[C@@]([H])(C([H])([H])[H])C1([H])[H])C([H])([H])[H]	0 (Inactive)	0	0	0
1385	PUBCHEM_CID_44484250	[H]OC([H])([H])[C@@]([H])(N1C(=O)c2c([H])c(N([H])C(=O)C([H])([H])n3nnnc3[H])c([H])c([H])c2O[C@@]([H])(C([H])([H])N(C([H])([H])[H])C([H])([H])c2c([H])c([H])c(Oc3c([H])c([H])c([H])c([H])c3[H])c([H])c2[H])[C@@]([H])(C([H])([H])[H])C1([H])[H])C([H])([H])[H]	0 (Inactive)	0	0	0
1386	PUBCHEM_CID_44484251	[H]OC([H])([H])[C@@]([H])(N1C(=O)c2c([H])c(N([H])S(=O)(=O)c3c([H])c([H])c(F)c([H])c3[H])c([H])c([H])c2O[C@@]([H])(C([H])([H])N(C(=O)N([H])c2c([H])c([H])c(c([H])c2[H])C(F)(F)F)C([H])([H])[H])[C@@]([H])(C([H])([H])[H])C1([H])[H])C([H])([H])[H]	0 (Inactive)	0	0	0
1387	PUBCHEM_CID_44484252	[H]OC([H])([H])[C@@]([H])(N1C(=O)c2c([H])c(c([H])c([H])c2O[C@@]([H])(C([H])([H])N(C([H])([H])[H])C([H])([H])C2([H])C([H])([H])C([H])([H])C([H])([H])C([H])([H])C2([H])[H])[C@@]([H])(C([H])([H])[H])C1([H])[H])N(C([H])([H])[H])C([H])([H])[H])C([H])([H])[H]	0 (Inactive)	0	0	0
1388	PUBCHEM_CID_44484253	[H]OC([H])([H])[C@@]([H])(N1C(=O)c2c([H])c(N([H])S(=O)(=O)c3c([H])c([H])c(c([H])c3[H])C([H])([H])[H])c([H])c([H])c2O[C@@]([H])(C([H])([H])N(C(=O)N([H])c2c([H])c([H])c3OC([H])([H])Oc3c2[H])C([H])([H])[H])[C@@]([H])(C([H])([H])[H])C1([H])[H])C([H])([H])[H]	0 (Inactive)	0	0	0
1389	PUBCHEM_CID_44484254	[H]OC([H])([H])[C@@]([H])(N1C(=O)c2c([H])c(c([H])c([H])c2O[C@@]([H])(C([H])([H])N(C([H])([H])[H])C([H])([H])c2c([H])c([H])nc([H])c2[H])[C@@]([H])(C([H])([H])[H])C1([H])[H])N(C([H])([H])[H])C([H])([H])[H])C([H])([H])[H]	0 (Inactive)	0	0	0
1390	PUBCHEM_CID_44484255	[H]OC([H])([H])[C@@]([H])(N1C(=O)c2c([H])c(N([H])S(=O)(=O)c3c(noc3C([H])([H])[H])C([H])([H])[H])c([H])c([H])c2O[C@@]([H])(C([H])([H])N(C([H])([H])[H])C([H])([H])c2c([H])c([H])c(c([H])c2[H])C(F)(F)F)[C@@]([H])(C([H])([H])[H])C1([H])[H])C([H])([H])[H]	0 (Inactive)	0	0	0
1391	PUBCHEM_CID_44484256	[H]OC([H])([H])[C@@]([H])(N1C(=O)c2c([H])c(N([H])C(=O)C([H])([H])C([H])([H])N3C([H])([H])C([H])([H])OC([H])([H])C3([H])[H])c([H])c([H])c2O[C@@]([H])(C([H])([H])N(C([H])([H])[H])C([H])([H])[H])[C@@]([H])(C([H])([H])[H])C1([H])[H])C([H])([H])[H]	0 (Inactive)	0	0	0
1392	PUBCHEM_CID_44484257	[H]OC([H])([H])[C@@]([H])(N1C(=O)c2c([H])c(N([H])C(=O)N([H])c3c([H])c([H])c(OC([H])([H])[H])c([H])c3[H])c([H])c([H])c2O[C@@]([H])(C([H])([H])N(C([H])([H])[H])C([H])([H])c2c([H])c([H])c(Oc3c([H])c([H])c([H])c([H])c3[H])c([H])c2[H])[C@@]([H])(C([H])([H])[H])C1([H])[H])C([H])([H])[H]	0 (Inactive)	0	0	0
1393	PUBCHEM_CID_44484258	[H]OC([H])([H])[C@@]([H])(N1C(=O)c2c([H])c(N([H])S(=O)(=O)c3c(noc3C([H])([H])[H])C([H])([H])[H])c([H])c([H])c2O[C@@]([H])(C([H])([H])N(C([H])([H])[H])C([H])([H])c2c([H])c([H])c([H])c([H])c2[H])[C@@]([H])(C([H])([H])[H])C1([H])[H])C([H])([H])[H]	0 (Inactive)	0	0	0
1394	PUBCHEM_CID_44484259	[H]OC([H])([H])[C@@]([H])(N1C(=O)c2c([H])c(N([H])C(=O)N([H])c3c(noc3C([H])([H])[H])C([H])([H])[H])c([H])c([H])c2O[C@@]([H])(C([H])([H])N(C([H])([H])[H])C([H])([H])[H])[C@@]([H])(C([H])([H])[H])C1([H])[H])C([H])([H])[H]	0 (Inactive)	0	0	0
1395	PUBCHEM_CID_44484260	[H]OC([H])([H])[C@@]([H])(N1C(=O)c2c([H])c(N([H])S(=O)(=O)C([H])([H])[H])c([H])c([H])c2O[C@@]([H])(C([H])([H])N(C([H])([H])[H])C([H])([H])c2c([H])c([H])c(c([H])c2[H])C(F)(F)F)[C@@]([H])(C([H])([H])[H])C1([H])[H])C([H])([H])[H]	0 (Inactive)	0	0	0
1396	PUBCHEM_CID_44484261	[H]OC([H])([H])[C@@]([H])(N1C(=O)c2c([H])c(c([H])c([H])c2O[C@@]([H])(C([H])([H])N(C(=O)N([H])c2c([H])c([H])c([H])c([H])c2[H])C([H])([H])[H])[C@@]([H])(C([H])([H])[H])C1([H])[H])N(C([H])([H])[H])C([H])([H])[H])C([H])([H])[H]	0 (Inactive)	0	0	0
1397	PUBCHEM_CID_44484262	[H]OC([H])([H])[C@@]([H])(N1C(=O)c2c([H])c(N([H])C(=O)N([H])c3c([H])c([H])c(c([H])c3[H])C(F)(F)F)c([H])c([H])c2O[C@@]([H])(C([H])([H])N(C([H])([H])[H])C([H])([H])c2c([H])c([H])c3OC([H])([H])Oc3c2[H])[C@@]([H])(C([H])([H])[H])C1([H])[H])C([H])([H])[H]	0 (Inactive)	0	0	0
1398	PUBCHEM_CID_44484263	[H]OC([H])([H])[C@@]([H])(N1C(=O)c2c([H])c(N([H])C(=O)C([H])([H])C([H])([H])N3C([H])([H])C([H])([H])OC([H])([H])C3([H])[H])c([H])c([H])c2O[C@@]([H])(C([H])([H])N(C([H])([H])[H])C([H])([H])c2c([H])c([H])c(Oc3c([H])c([H])c([H])c([H])c3[H])c([H])c2[H])[C@@]([H])(C([H])([H])[H])C1([H])[H])C([H])([H])[H]	0 (Inactive)	0	0	0
1400	PUBCHEM_CID_44484265	[H]OC([H])([H])[C@@]([H])(N1C(=O)c2c([H])c(N([H])C(=O)N([H])c3c(noc3C([H])([H])[H])C([H])([H])[H])c([H])c([H])c2O[C@@]([H])(C([H])([H])N(C(=O)N([H])c2c([H])c([H])c([H])c3c([H])c([H])c([H])c([H])c23)C([H])([H])[H])[C@@]([H])(C([H])([H])[H])C1([H])[H])C([H])([H])[H]	0 (Inactive)	0	0	0
1401	PUBCHEM_CID_44484266	[H]OC([H])([H])[C@@]([H])(N1C(=O)c2c([H])c(N([H])S(=O)(=O)c3c([H])c([H])c([H])c([H])c3[H])c([H])c([H])c2O[C@@]([H])(C([H])([H])N(C([H])([H])[H])C([H])([H])c2c([H])c([H])c(Cl)c(Cl)c2[H])[C@@]([H])(C([H])([H])[H])C1([H])[H])C([H])([H])[H]	0 (Inactive)	0	0	0
1402	PUBCHEM_CID_44484267	[H]OC([H])([H])[C@@]([H])(N1C(=O)c2c([H])c(N([H])C(=O)C([H])([H])c3c([H])n(c4c([H])c([H])c([H])c([H])c34)C([H])([H])[H])c([H])c([H])c2O[C@@]([H])(C([H])([H])N(C([H])([H])[H])C([H])([H])c2c([H])c([H])c3OC([H])([H])Oc3c2[H])[C@@]([H])(C([H])([H])[H])C1([H])[H])C([H])([H])[H]	0 (Inactive)	0	0	0
1403	PUBCHEM_CID_44484268	[H]OC([H])([H])[C@@]([H])(N1C(=O)c2c([H])c(N([H])C(=O)C([H])([H])c3c([H])n(c4c([H])c([H])c([H])c([H])c34)C([H])([H])[H])c([H])c([H])c2O[C@@]([H])(C([H])([H])N(C([H])([H])[H])C([H])([H])c2c([H])c([H])c(Oc3c([H])c([H])c([H])c([H])c3[H])c([H])c2[H])[C@@]([H])(C([H])([H])[H])C1([H])[H])C([H])([H])[H]	0 (Inactive)	0	0	0
1404	PUBCHEM_CID_44484269	[H]OC([H])([H])[C@@]([H])(N1C(=O)c2c([H])c(N([H])C(=O)C([H])([H])C([H])([H])C(F)(F)F)c([H])c([H])c2O[C@@]([H])(C([H])([H])N(C([H])([H])[H])C([H])([H])c2c([H])c([H])c(Oc3c([H])c([H])c([H])c([H])c3[H])c([H])c2[H])[C@@]([H])(C([H])([H])[H])C1([H])[H])C([H])([H])[H]	0 (Inactive)	0	0	0
1405	PUBCHEM_CID_44484270	[H]OC([H])([H])[C@@]([H])(N1C(=O)c2c([H])c(N([H])C(=O)C([H])([H])c3c([H])c([H])c([H])c([H])c3[H])c([H])c([H])c2O[C@@]([H])(C([H])([H])N(C([H])([H])[H])C([H])([H])c2c([H])c([H])c3OC([H])([H])Oc3c2[H])[C@@]([H])(C([H])([H])[H])C1([H])[H])C([H])([H])[H]	0 (Inactive)	0	0	0
1406	PUBCHEM_CID_44484271	[H]OC([H])([H])[C@@]([H])(N1C(=O)c2c([H])c(N([H])C(=O)C([H])([H])C([H])([H])C([H])([H])N(C([H])([H])[H])C([H])([H])[H])c([H])c([H])c2O[C@@]([H])(C([H])([H])N(C([H])([H])[H])C([H])([H])c2c([H])c([H])c(c([H])c2[H])C(F)(F)F)[C@@]([H])(C([H])([H])[H])C1([H])[H])C([H])([H])[H]	0 (Inactive)	0	0	0
1407	PUBCHEM_CID_44484272	[H]OC([H])([H])[C@@]([H])(N1C(=O)c2c([H])c(N([H])C(=O)N([H])c3c([H])c([H])c([H])c4c([H])c([H])c([H])c([H])c34)c([H])c([H])c2O[C@@]([H])(C([H])([H])N(C(=O)N([H])C([H])(C([H])([H])[H])C([H])([H])[H])C([H])([H])[H])[C@@]([H])(C([H])([H])[H])C1([H])[H])C([H])([H])[H]	0 (Inactive)	0	0	0
1408	PUBCHEM_CID_44484273	[H]OC([H])([H])[C@@]([H])(N1C(=O)c2c([H])c(N([H])S(=O)(=O)C([H])([H])[H])c([H])c([H])c2O[C@@]([H])(C([H])([H])N(C(=O)N([H])C([H])(C([H])([H])[H])C([H])([H])[H])C([H])([H])[H])[C@@]([H])(C([H])([H])[H])C1([H])[H])C([H])([H])[H]	0 (Inactive)	0	0	0
1409	PUBCHEM_CID_44484274	[H]OC([H])([H])[C@@]([H])(N1C(=O)c2c([H])c(N([H])C(=O)N([H])c3c([H])c([H])c4OC([H])([H])Oc4c3[H])c([H])c([H])c2O[C@@]([H])(C([H])([H])N(C([H])([H])[H])C([H])([H])c2c([H])c([H])nc([H])c2[H])[C@@]([H])(C([H])([H])[H])C1([H])[H])C([H])([H])[H]	0 (Inactive)	0	0	0
1410	PUBCHEM_CID_44484275	[H]OC([H])([H])[C@@]([H])(N1C(=O)c2c([H])c(N([H])S(=O)(=O)c3c([H])c([H])c(Cl)c([H])c3[H])c([H])c([H])c2O[C@@]([H])(C([H])([H])N(C(=O)N([H])c2c([H])c([H])c(OC([H])([H])[H])c([H])c2[H])C([H])([H])[H])[C@@]([H])(C([H])([H])[H])C1([H])[H])C([H])([H])[H]	0 (Inactive)	0	0	0
1411	PUBCHEM_CID_44484276	[H]OC([H])([H])[C@@]([H])(N1C(=O)c2c([H])c(c([H])c([H])c2O[C@@]([H])(C([H])([H])N(C([H])([H])[H])S(=O)(=O)c2c([H])c([H])c(F)c([H])c2[H])[C@@]([H])(C([H])([H])[H])C1([H])[H])N(C([H])([H])[H])C([H])([H])[H])C([H])([H])[H]	0 (Inactive)	0	0	0
1412	PUBCHEM_CID_44484277	[H]OC([H])([H])[C@@]([H])(N1C(=O)c2c([H])c(N([H])C(=O)C([H])([H])C([H])([H])C(F)(F)F)c([H])c([H])c2O[C@@]([H])(C([H])([H])N(C([H])([H])[H])C([H])([H])c2c([H])c([H])c(Cl)c(Cl)c2[H])[C@@]([H])(C([H])([H])[H])C1([H])[H])C([H])([H])[H]	0 (Inactive)	0	0	0
1413	PUBCHEM_CID_44484278	[H]OC([H])([H])[C@@]([H])(N1C(=O)c2c([H])c(N([H])S(=O)(=O)c3c([H])c([H])c(OC([H])([H])[H])c([H])c3[H])c([H])c([H])c2O[C@@]([H])(C([H])([H])N(C(=O)N([H])c2c([H])c([H])c(c([H])c2[H])C(F)(F)F)C([H])([H])[H])[C@@]([H])(C([H])([H])[H])C1([H])[H])C([H])([H])[H]	0 (Inactive)	0	0	0
1414	PUBCHEM_CID_44484279	[H]OC([H])([H])[C@@]([H])(N1C(=O)c2c([H])c(N([H])C(=O)c3c([H])c([H])nc([H])c3[H])c([H])c([H])c2O[C@@]([H])(C([H])([H])N(C(=O)N([H])c2c([H])c([H])c(OC([H])([H])[H])c([H])c2[H])C([H])([H])[H])[C@@]([H])(C([H])([H])[H])C1([H])[H])C([H])([H])[H]	0 (Inactive)	0	0	0
1416	PUBCHEM_CID_44484281	[H]OC([H])([H])[C@@]([H])(N1C(=O)c2c([H])c(N([H])C(=O)C([H])([H])n3nnnc3[H])c([H])c([H])c2O[C@@]([H])(C([H])([H])N(C([H])([H])[H])C([H])([H])c2c([H])c([H])c(c([H])c2[H])C(F)(F)F)[C@@]([H])(C([H])([H])[H])C1([H])[H])C([H])([H])[H]	0 (Inactive)	0	0	0
1417	PUBCHEM_CID_44484282	[H]OC([H])([H])[C@@]([H])(N1C(=O)c2c([H])c(N([H])C(=O)C3([H])C([H])([H])C([H])([H])C([H])([H])C([H])([H])C3([H])[H])c([H])c([H])c2O[C@@]([H])(C([H])([H])N(C([H])([H])[H])C([H])([H])c2c([H])c([H])c3OC([H])([H])Oc3c2[H])[C@@]([H])(C([H])([H])[H])C1([H])[H])C([H])([H])[H]	0 (Inactive)	0	0	0
1418	PUBCHEM_CID_44484283	[H]OC([H])([H])[C@@]([H])(N1C(=O)c2c([H])c(N([H])S(=O)(=O)c3c([H])c([H])c(Cl)c([H])c3[H])c([H])c([H])c2O[C@@]([H])(C([H])([H])N(C(=O)N([H])c2c([H])c([H])c3OC([H])([H])Oc3c2[H])C([H])([H])[H])[C@@]([H])(C([H])([H])[H])C1([H])[H])C([H])([H])[H]	0 (Inactive)	0	0	0
1419	PUBCHEM_CID_44484284	[H]OC([H])([H])[C@@]([H])(N1C(=O)c2c([H])c(N([H])S(=O)(=O)c3c([H])c([H])c(c([H])c3[H])C([H])([H])[H])c([H])c([H])c2O[C@@]([H])(C([H])([H])N(C([H])([H])[H])C([H])([H])c2c([H])c([H])c3OC([H])([H])Oc3c2[H])[C@@]([H])(C([H])([H])[H])C1([H])[H])C([H])([H])[H]	0 (Inactive)	0	0	0
1420	PUBCHEM_CID_44484285	[H]OC([H])([H])[C@@]([H])(N1C(=O)c2c([H])c(N([H])C(=O)c3c([H])c([H])nc([H])c3[H])c([H])c([H])c2O[C@@]([H])(C([H])([H])N(C(=O)N([H])c2c([H])c([H])c(F)c([H])c2[H])C([H])([H])[H])[C@@]([H])(C([H])([H])[H])C1([H])[H])C([H])([H])[H]	0 (Inactive)	0	0	0
1421	PUBCHEM_CID_44484286	[H]OC([H])([H])[C@@]([H])(N1C(=O)c2c([H])c(N([H])C(=O)c3c([H])c([H])nc([H])c3[H])c([H])c([H])c2O[C@@]([H])(C([H])([H])N(C([H])([H])[H])C([H])([H])c2c([H])c([H])nc([H])c2[H])[C@@]([H])(C([H])([H])[H])C1([H])[H])C([H])([H])[H]	0 (Inactive)	0	0	0
1422	PUBCHEM_CID_44484287	[H]OC([H])([H])[C@@]([H])(N1C(=O)c2c([H])c(N([H])C(=O)N([H])c3c([H])c([H])c([H])c4c([H])c([H])c([H])c([H])c34)c([H])c([H])c2O[C@@]([H])(C([H])([H])N(C([H])([H])[H])C([H])([H])c2c([H])c([H])c(c([H])c2[H])C(F)(F)F)[C@@]([H])(C([H])([H])[H])C1([H])[H])C([H])([H])[H]	0 (Inactive)	0	0	0
1423	PUBCHEM_CID_44484288	[H]OC([H])([H])[C@@]([H])(N1C(=O)c2c([H])c(N([H])S(=O)(=O)c3c([H])c([H])c(c([H])c3[H])C([H])([H])[H])c([H])c([H])c2O[C@@]([H])(C([H])([H])N(C([H])([H])[H])C([H])([H])c2c([H])c([H])c(Cl)c(Cl)c2[H])[C@@]([H])(C([H])([H])[H])C1([H])[H])C([H])([H])[H]	0 (Inactive)	0	0	0
1424	PUBCHEM_CID_44484289	[H]OC([H])([H])[C@@]([H])(N1C(=O)c2c([H])c(N([H])C(=O)c3c([H])c([H])nc([H])c3[H])c([H])c([H])c2O[C@@]([H])(C([H])([H])N(C([H])([H])[H])S(=O)(=O)c2c([H])c([H])c([H])c([H])c2[H])[C@@]([H])(C([H])([H])[H])C1([H])[H])C([H])([H])[H]	0 (Inactive)	0	0	0
1425	PUBCHEM_CID_44484290	[H]OC([H])([H])[C@@]([H])(N1C(=O)c2c([H])c(N([H])S(=O)(=O)c3c([H])c([H])c(OC([H])([H])[H])c([H])c3[H])c([H])c([H])c2O[C@@]([H])(C([H])([H])N(C(=O)N([H])c2c([H])c([H])c(F)c([H])c2[H])C([H])([H])[H])[C@@]([H])(C([H])([H])[H])C1([H])[H])C([H])([H])[H]	0 (Inactive)	0	0	0
1426	PUBCHEM_CID_44484291	[H]OC([H])([H])[C@@]([H])(N1C(=O)c2c([H])c(N([H])S(=O)(=O)c3c([H])c([H])c(c([H])c3[H])C([H])([H])[H])c([H])c([H])c2O[C@@]([H])(C([H])([H])N(C([H])([H])[H])S(=O)(=O)c2c([H])c([H])c(F)c([H])c2[H])[C@@]([H])(C([H])([H])[H])C1([H])[H])C([H])([H])[H]	0 (Inactive)	0	0	0
1427	PUBCHEM_CID_44484292	[H]OC([H])([H])[C@@]([H])(N1C(=O)c2c([H])c(N([H])S(=O)(=O)c3c(noc3C([H])([H])[H])C([H])([H])[H])c([H])c([H])c2O[C@@]([H])(C([H])([H])N(C(=O)N([H])c2c([H])c([H])c3OC([H])([H])Oc3c2[H])C([H])([H])[H])[C@@]([H])(C([H])([H])[H])C1([H])[H])C([H])([H])[H]	0 (Inactive)	0	0	0
1428	PUBCHEM_CID_44484293	[H]OC([H])([H])[C@@]([H])(N1C(=O)c2c([H])c(N([H])S(=O)(=O)c3sc([H])c([H])c3[H])c([H])c([H])c2O[C@@]([H])(C([H])([H])N(C(=O)N([H])c2c([H])c([H])c(c([H])c2[H])C(F)(F)F)C([H])([H])[H])[C@@]([H])(C([H])([H])[H])C1([H])[H])C([H])([H])[H]	0 (Inactive)	0	0	0
1429	PUBCHEM_CID_44484294	[H]OC([H])([H])[C@@]([H])(N1C(=O)c2c([H])c(N([H])C(=O)c3c([H])c([H])nc([H])c3[H])c([H])c([H])c2O[C@@]([H])(C([H])([H])N(C(=O)N([H])c2c([H])c([H])c3OC([H])([H])Oc3c2[H])C([H])([H])[H])[C@@]([H])(C([H])([H])[H])C1([H])[H])C([H])([H])[H]	0 (Inactive)	0	0	0
1430	PUBCHEM_CID_44201994	[H]OC([H])([H])[C@@]([H])(N1C(=O)c2c([H])c(N([H])C(=O)C3([H])C([H])([H])C([H])([H])C([H])([H])C([H])([H])C3([H])[H])c([H])c([H])c2O[C@@]([H])(C([H])([H])N(C([H])([H])[H])C([H])([H])c2c([H])c([H])c(c([H])c2[H])-c2c([H])c([H])c([H])c([H])c2[H])[C@@]([H])(C([H])([H])[H])C1([H])[H])C([H])([H])[H]	0 (Inactive)	0	0	0
1431	PUBCHEM_CID_44484295	[H]OC([H])([H])[C@@]([H])(N1C(=O)c2c([H])c(N([H])C(=O)C([H])([H])C([H])([H])N3C([H])([H])C([H])([H])OC([H])([H])C3([H])[H])c([H])c([H])c2O[C@@]([H])(C([H])([H])N(C([H])([H])[H])C([H])([H])c2c([H])c([H])c(Cl)c(Cl)c2[H])[C@@]([H])(C([H])([H])[H])C1([H])[H])C([H])([H])[H]	0 (Inactive)	0	0	0
1433	PUBCHEM_CID_44484297	[H]OC([H])([H])[C@@]([H])(N1C(=O)c2c([H])c(N([H])S(=O)(=O)C([H])([H])[H])c([H])c([H])c2O[C@@]([H])(C([H])([H])N(C(=O)N([H])c2c([H])c([H])c([H])c3c([H])c([H])c([H])c([H])c23)C([H])([H])[H])[C@@]([H])(C([H])([H])[H])C1([H])[H])C([H])([H])[H]	0 (Inactive)	0	0	0
1434	PUBCHEM_CID_44202726	[H]OC([H])([H])[C@]([H])(N1C(=O)c2c([H])c(N([H])C(=O)C([H])([H])n3nnnc3[H])c([H])c([H])c2O[C@]([H])(C([H])([H])N(C([H])([H])[H])C([H])([H])c2c([H])c([H])c(Cl)c(Cl)c2[H])[C@@]([H])(C([H])([H])[H])C1([H])[H])C([H])([H])[H]	0 (Inactive)	0	0	0
1435	PUBCHEM_CID_44484298	[H]OC([H])([H])[C@]([H])(N1C(=O)c2c([H])c(N([H])C(=O)C3([H])C([H])([H])C3([H])[H])c([H])c([H])c2O[C@]([H])(C([H])([H])N(C([H])([H])[H])C([H])([H])c2c([H])c([H])c(OC([H])([H])[H])c([H])c2[H])[C@@]([H])(C([H])([H])[H])C1([H])[H])C([H])([H])[H]	0 (Inactive)	0	0	0
1436	PUBCHEM_CID_44484300	[H]OC([H])([H])[C@]([H])(N1C(=O)c2c([H])c(N([H])S(=O)(=O)c3sc([H])c([H])c3[H])c([H])c([H])c2O[C@]([H])(C([H])([H])N(C([H])([H])[H])C([H])([H])C2([H])C([H])([H])C2([H])[H])[C@@]([H])(C([H])([H])[H])C1([H])[H])C([H])([H])[H]	0 (Inactive)	0	0	0
1437	PUBCHEM_CID_44484301	[H]OC([H])([H])[C@]([H])(N1C(=O)c2c([H])c(N([H])C(=O)N([H])c3c([H])c([H])c4OC([H])([H])Oc4c3[H])c([H])c([H])c2O[C@]([H])(C([H])([H])N(C([H])([H])[H])C([H])([H])[H])[C@@]([H])(C([H])([H])[H])C1([H])[H])C([H])([H])[H]	0 (Inactive)	0	0	0
1438	PUBCHEM_CID_44484302	[H]OC([H])([H])[C@]([H])(N1C(=O)c2c([H])c(N([H])S(=O)(=O)c3c([H])c([H])c([H])c([H])c3[H])c([H])c([H])c2O[C@]([H])(C([H])([H])N(C([H])([H])[H])C([H])([H])[H])[C@@]([H])(C([H])([H])[H])C1([H])[H])C([H])([H])[H]	0 (Inactive)	0	0	0
1439	PUBCHEM_CID_44484303	[H]OC([H])([H])[C@]([H])(N1C(=O)c2c([H])c(c([H])c([H])c2O[C@]([H])(C([H])([H])N(C([H])([H])[H])C([H])([H])c2c([H])c([H])nc([H])c2[H])[C@@]([H])(C([H])([H])[H])C1([H])[H])N(C([H])([H])[H])C([H])([H])[H])C([H])([H])[H]	0 (Inactive)	0	0	0
1440	PUBCHEM_CID_44484304	[H]OC([H])([H])[C@]([H])(N1C(=O)c2c([H])c(N([H])C(=O)N([H])C3([H])C([H])([H])C([H])([H])C([H])([H])C([H])([H])C3([H])[H])c([H])c([H])c2O[C@]([H])(C([H])([H])N(C([H])([H])[H])C([H])([H])c2c([H])c([H])c3OC([H])([H])Oc3c2[H])[C@@]([H])(C([H])([H])[H])C1([H])[H])C([H])([H])[H]	0 (Inactive)	0	0	0
1441	PUBCHEM_CID_44484305	[H]OC([H])([H])[C@]([H])(N1C(=O)c2c([H])c(N([H])C(=O)N([H])c3c([H])c([H])c([H])c([H])c3[H])c([H])c([H])c2O[C@]([H])(C([H])([H])N(C([H])([H])[H])C([H])([H])c2c([H])c([H])nc([H])c2[H])[C@@]([H])(C([H])([H])[H])C1([H])[H])C([H])([H])[H]	0 (Inactive)	0	0	0
1442	PUBCHEM_CID_44484306	[H]OC([H])([H])[C@]([H])(N1C(=O)c2c([H])c(N([H])C(=O)N([H])c3c([H])c([H])c(F)c([H])c3[H])c([H])c([H])c2O[C@]([H])(C([H])([H])N(C(=O)N([H])c2c(noc2C([H])([H])[H])C([H])([H])[H])C([H])([H])[H])[C@@]([H])(C([H])([H])[H])C1([H])[H])C([H])([H])[H]	0 (Inactive)	0	0	0
1443	PUBCHEM_CID_44484307	[H]OC([H])([H])[C@]([H])(N1C(=O)c2c([H])c(c([H])c([H])c2O[C@]([H])(C([H])([H])N(C([H])([H])[H])C([H])([H])c2c([H])c([H])c([H])c([H])c2[H])[C@@]([H])(C([H])([H])[H])C1([H])[H])N(C([H])([H])[H])C([H])([H])[H])C([H])([H])[H]	0 (Inactive)	0	0	0
1444	PUBCHEM_CID_44202392	[H]OC([H])([H])[C@]([H])(N1C(=O)c2c([H])c(N([H])S(=O)(=O)c3c([H])c([H])c([H])c([H])c3[H])c([H])c([H])c2O[C@]([H])(C([H])([H])N(C(=O)N([H])c2c([H])c([H])c(OC([H])([H])[H])c([H])c2[H])C([H])([H])[H])[C@@]([H])(C([H])([H])[H])C1([H])[H])C([H])([H])[H]	0 (Inactive)	0	0	0
1445	PUBCHEM_CID_44484308	[H]OC([H])([H])[C@]([H])(N1C(=O)c2c([H])c(N([H])C(=O)N([H])c3c([H])c([H])c(F)c([H])c3[H])c([H])c([H])c2O[C@]([H])(C([H])([H])N([H])C([H])([H])[H])[C@@]([H])(C([H])([H])[H])C1([H])[H])C([H])([H])[H]	0 (Inactive)	0	0	0
1446	PUBCHEM_CID_44484309	[H]OC([H])([H])[C@@]([H])(N1C(=O)c2c([H])c(N([H])C(=O)N([H])c3c([H])c([H])c([H])c([H])c3[H])c([H])c([H])c2O[C@@]([H])(C([H])([H])N(C(=O)N([H])c2c([H])c([H])c([H])c([H])c2[H])C([H])([H])[H])[C@]([H])(C([H])([H])[H])C1([H])[H])C([H])([H])[H]	0 (Inactive)	0	0	0
1447	PUBCHEM_CID_44484311	[H]OC([H])([H])[C@@]([H])(N1C(=O)c2c([H])c(N([H])S(=O)(=O)c3sc([H])c([H])c3[H])c([H])c([H])c2O[C@@]([H])(C([H])([H])N(C([H])([H])[H])C([H])([H])C2([H])C([H])([H])C2([H])[H])[C@]([H])(C([H])([H])[H])C1([H])[H])C([H])([H])[H]	0 (Inactive)	0	0	0
1448	PUBCHEM_CID_44484312	[H]OC([H])([H])[C@@]([H])(N1C(=O)c2c([H])c(N([H])C(=O)N([H])c3c([H])c([H])c(F)c([H])c3[H])c([H])c([H])c2O[C@@]([H])(C([H])([H])N(C(=O)N([H])C2([H])C([H])([H])C([H])([H])C([H])([H])C([H])([H])C2([H])[H])C([H])([H])[H])[C@]([H])(C([H])([H])[H])C1([H])[H])C([H])([H])[H]	0 (Inactive)	0	0	0
1449	PUBCHEM_CID_44484313	[H]OC([H])([H])[C@@]([H])(N1C(=O)c2c([H])c(N([H])C(=O)N([H])c3c([H])c([H])c([H])c([H])c3[H])c([H])c([H])c2O[C@@]([H])(C([H])([H])N(C([H])([H])[H])C([H])([H])c2c([H])c([H])nc([H])c2[H])[C@]([H])(C([H])([H])[H])C1([H])[H])C([H])([H])[H]	0 (Inactive)	0	0	0
1450	PUBCHEM_CID_44484315	[H]OC([H])([H])[C@@]([H])(N1C(=O)c2c([H])c(N([H])C(=O)N([H])C3([H])C([H])([H])C([H])([H])C([H])([H])C([H])([H])C3([H])[H])c([H])c([H])c2O[C@@]([H])(C([H])([H])N(C([H])([H])[H])S(=O)(=O)c2c([H])c([H])c([H])c([H])c2[H])[C@]([H])(C([H])([H])[H])C1([H])[H])C([H])([H])[H]	0 (Inactive)	0	0	0
1451	PUBCHEM_CID_44484317	[H]OC([H])([H])[C@@]([H])(N1C(=O)c2c([H])c(N([H])C(=O)N([H])c3c([H])c([H])c(OC([H])([H])[H])c([H])c3[H])c([H])c([H])c2O[C@@]([H])(C([H])([H])N(C([H])([H])[H])S(=O)(=O)c2c([H])c([H])c(OC([H])([H])[H])c([H])c2[H])[C@]([H])(C([H])([H])[H])C1([H])[H])C([H])([H])[H]	0 (Inactive)	0	0	0
1452	PUBCHEM_CID_44484318	[H]OC([H])([H])[C@@]([H])(N1C(=O)c2c([H])c(N([H])C(=O)N([H])c3c([H])c([H])c([H])c([H])c3[H])c([H])c([H])c2O[C@@]([H])(C([H])([H])N(C(=O)N([H])c2c([H])c([H])c(c([H])c2[H])C(F)(F)F)C([H])([H])[H])[C@]([H])(C([H])([H])[H])C1([H])[H])C([H])([H])[H]	0 (Inactive)	0	0	0
1453	PUBCHEM_CID_44484319	[H]OC([H])([H])[C@@]([H])(N1C(=O)c2c([H])c(N([H])C(=O)N([H])c3c([H])c([H])c4OC([H])([H])Oc4c3[H])c([H])c([H])c2O[C@@]([H])(C([H])([H])N(C(=O)N([H])C2([H])C([H])([H])C([H])([H])C([H])([H])C([H])([H])C2([H])[H])C([H])([H])[H])[C@]([H])(C([H])([H])[H])C1([H])[H])C([H])([H])[H]	0 (Inactive)	0	0	0
1454	PUBCHEM_CID_44484321	[H]OC([H])([H])[C@@]([H])(N1C(=O)c2c([H])c(N([H])C(=O)C3([H])C([H])([H])C3([H])[H])c([H])c([H])c2O[C@@]([H])(C([H])([H])N(C([H])([H])[H])C([H])([H])c2c([H])c([H])c(OC([H])([H])[H])c([H])c2[H])[C@]([H])(C([H])([H])[H])C1([H])[H])C([H])([H])[H]	0 (Inactive)	0	0	0
1455	PUBCHEM_CID_44484322	[H]OC([H])([H])[C@@]([H])(N1C(=O)c2c([H])c(N([H])C(=O)N([H])c3c([H])c([H])c(F)c([H])c3[H])c([H])c([H])c2O[C@@]([H])(C([H])([H])N(C(=O)N([H])c2c(noc2C([H])([H])[H])C([H])([H])[H])C([H])([H])[H])[C@]([H])(C([H])([H])[H])C1([H])[H])C([H])([H])[H]	0 (Inactive)	0	0	0
1456	PUBCHEM_CID_44484323	[H]OC([H])([H])[C@@]([H])(N1C(=O)c2c([H])c(N([H])C(=O)C3([H])C([H])([H])C3([H])[H])c([H])c([H])c2O[C@@]([H])(C([H])([H])N(C(=O)N([H])c2c([H])c([H])c([H])c([H])c2[H])C([H])([H])[H])[C@]([H])(C([H])([H])[H])C1([H])[H])C([H])([H])[H]	0 (Inactive)	0	0	0
1457	PUBCHEM_CID_44484325	[H]OC([H])([H])[C@@]([H])(N1C(=O)c2c([H])c(N([H])S(=O)(=O)c3c(noc3C([H])([H])[H])C([H])([H])[H])c([H])c([H])c2O[C@@]([H])(C([H])([H])N(C(=O)N([H])c2c([H])c([H])c(F)c([H])c2[H])C([H])([H])[H])[C@]([H])(C([H])([H])[H])C1([H])[H])C([H])([H])[H]	0 (Inactive)	0	0	0
1458	PUBCHEM_CID_44202447	[H]OC([H])([H])[C@@]([H])(N1C(=O)c2c([H])c(N([H])C(=O)C3([H])C([H])([H])C3([H])[H])c([H])c([H])c2O[C@@]([H])(C([H])([H])N(C([H])([H])[H])C([H])([H])[H])[C@]([H])(C([H])([H])[H])C1([H])[H])C([H])([H])[H]	0 (Inactive)	0	0	0
1459	PUBCHEM_CID_44484327	[H]OC([H])([H])[C@@]([H])(N1C(=O)c2c([H])c(N([H])C(=O)C([H])([H])C([H])([H])C([H])([H])N(C([H])([H])[H])C([H])([H])[H])c([H])c([H])c2O[C@@]([H])(C([H])([H])N(C([H])([H])[H])C([H])([H])c2c([H])c([H])c3OC([H])([H])Oc3c2[H])[C@]([H])(C([H])([H])[H])C1([H])[H])C([H])([H])[H]	0 (Inactive)	0	0	0
1460	PUBCHEM_CID_44484329	[H]OC([H])([H])[C@@]([H])(N1C(=O)c2c([H])c(N([H])C(=O)C([H])([H])C([H])([H])N3C([H])([H])C([H])([H])OC([H])([H])C3([H])[H])c([H])c([H])c2O[C@@]([H])(C([H])([H])N(C([H])([H])[H])C([H])([H])c2c([H])c([H])c(OC([H])([H])[H])c([H])c2[H])[C@]([H])(C([H])([H])[H])C1([H])[H])C([H])([H])[H]	0 (Inactive)	0	0	0
1461	PUBCHEM_CID_44484330	[H]OC([H])([H])[C@@]([H])(N1C(=O)c2c([H])c(N([H])C(=O)N([H])c3c([H])c([H])c4OC([H])([H])Oc4c3[H])c([H])c([H])c2O[C@@]([H])(C([H])([H])N(C([H])([H])[H])C([H])([H])[H])[C@]([H])(C([H])([H])[H])C1([H])[H])C([H])([H])[H]	0 (Inactive)	0	0	0
1462	PUBCHEM_CID_44484331	[H]OC([H])([H])[C@@]([H])(N1C(=O)c2c([H])c(N([H])S(=O)(=O)c3c([H])c([H])c([H])c([H])c3[H])c([H])c([H])c2O[C@@]([H])(C([H])([H])N(C([H])([H])[H])C([H])([H])[H])[C@]([H])(C([H])([H])[H])C1([H])[H])C([H])([H])[H]	0 (Inactive)	0	0	0
1463	PUBCHEM_CID_44484332	[H]OC(=O)c1c([H])c([H])c(c([H])c1[H])C([H])([H])N(C([H])([H])[H])C([H])([H])[C@]1([H])Oc2c([H])c([H])c(N([H])C(=O)C3([H])C([H])([H])C3([H])[H])c([H])c2C(=O)N(C([H])([H])[C@]1([H])C([H])([H])[H])[C@@]([H])(C([H])([H])[H])C([H])([H])O[H]	0 (Inactive)	0	0	0
1464	PUBCHEM_CID_44484333	[H]OC([H])([H])[C@@]([H])(N1C(=O)c2c([H])c(N([H])[H])c([H])c([H])c2O[C@@]([H])(C([H])([H])N([H])C([H])([H])[H])[C@]([H])(C([H])([H])[H])C1([H])[H])C([H])([H])[H]	0 (Inactive)	0	0	0
1465	PUBCHEM_CID_44484334	[H]OC([H])([H])[C@@]([H])(N1C(=O)c2c([H])c(N([H])C(=O)N([H])c3c([H])c([H])c4OC([H])([H])Oc4c3[H])c([H])c([H])c2O[C@@]([H])(C([H])([H])N(C([H])([H])[H])S(=O)(=O)c2sc([H])c([H])c2[H])[C@]([H])(C([H])([H])[H])C1([H])[H])C([H])([H])[H]	0 (Inactive)	0	0	0
1466	PUBCHEM_CID_44484335	[H]OC([H])([H])[C@@]([H])(N1C(=O)c2c([H])c(c([H])c([H])c2O[C@@]([H])(C([H])([H])N(C([H])([H])[H])C([H])([H])c2c([H])c([H])c([H])c([H])c2[H])[C@]([H])(C([H])([H])[H])C1([H])[H])N(C([H])([H])[H])C([H])([H])[H])C([H])([H])[H]	0 (Inactive)	0	0	0
1467	PUBCHEM_CID_44484336	[H]OC([H])([H])[C@@]([H])(N1C(=O)c2c([H])c(N([H])C(=O)C([H])([H])n3nnnc3[H])c([H])c([H])c2O[C@@]([H])(C([H])([H])N(C([H])([H])[H])S(=O)(=O)c2sc([H])c([H])c2[H])[C@]([H])(C([H])([H])[H])C1([H])[H])C([H])([H])[H]	0 (Inactive)	0	0	0
1468	PUBCHEM_CID_44484337	[H]OC([H])([H])[C@@]([H])(N1C(=O)c2c([H])c(N([H])C(=O)C3([H])C([H])([H])C3([H])[H])c([H])c([H])c2O[C@@]([H])(C([H])([H])N(C([H])([H])[H])S(=O)(=O)c2nc([H])n(c2[H])C([H])([H])[H])[C@]([H])(C([H])([H])[H])C1([H])[H])C([H])([H])[H]	0 (Inactive)	0	0	0
1469	PUBCHEM_CID_44484338	[H]OC([H])([H])[C@@]([H])(N1C(=O)c2c([H])c(N([H])C(=O)C([H])([H])C([H])([H])C(F)(F)F)c([H])c([H])c2O[C@@]([H])(C([H])([H])N([H])C([H])([H])[H])[C@]([H])(C([H])([H])[H])C1([H])[H])C([H])([H])[H]	0 (Inactive)	0	0	0
1470	PUBCHEM_CID_44484339	[H]OC([H])([H])[C@@]([H])(N1C(=O)c2c([H])c(N([H])C(=O)c3c([H])c([H])nc([H])c3[H])c([H])c([H])c2O[C@@]([H])(C([H])([H])N(C([H])([H])[H])C([H])([H])[H])[C@]([H])(C([H])([H])[H])C1([H])[H])C([H])([H])[H]	0 (Inactive)	0	0	0
1471	PUBCHEM_CID_44484340	[H]OC([H])([H])[C@@]([H])(N1C(=O)c2c([H])c(N([H])C(=O)C([H])([H])C([H])([H])C(F)(F)F)c([H])c([H])c2O[C@@]([H])(C([H])([H])N(C([H])([H])[H])C([H])([H])[H])[C@]([H])(C([H])([H])[H])C1([H])[H])C([H])([H])[H]	0 (Inactive)	0	0	0
1472	PUBCHEM_CID_44484341	[H]OC(=O)c1c([H])c([H])c(c([H])c1[H])C([H])([H])N(C([H])([H])[H])C([H])([H])[C@]1([H])Oc2c([H])c([H])c(N([H])C(=O)N([H])c3c([H])c([H])c(OC([H])([H])[H])c([H])c3[H])c([H])c2C(=O)N(C([H])([H])[C@@]1([H])C([H])([H])[H])[C@@]([H])(C([H])([H])[H])C([H])([H])O[H]	0 (Inactive)	0	0	0
1473	PUBCHEM_CID_44484342	[H]OC([H])([H])[C@@]([H])(N1C(=O)c2c([H])c(N([H])C(=O)N([H])c3c([H])c([H])c4OC([H])([H])Oc4c3[H])c([H])c([H])c2O[C@@]([H])(C([H])([H])N(C(=O)N([H])c2c([H])c([H])c3OC([H])([H])Oc3c2[H])C([H])([H])[H])[C@]([H])(C([H])([H])[H])C1([H])[H])C([H])([H])[H]	0 (Inactive)	0	0	0
1474	PUBCHEM_CID_44484343	[H]OC([H])([H])[C@@]([H])(N1C(=O)c2c([H])c(N([H])C(=O)C([H])([H])c3c([H])c([H])c([H])c([H])c3[H])c([H])c([H])c2O[C@@]([H])(C([H])([H])N(C(=O)N([H])c2c(noc2C([H])([H])[H])C([H])([H])[H])C([H])([H])[H])[C@]([H])(C([H])([H])[H])C1([H])[H])C([H])([H])[H]	0 (Inactive)	0	0	0
1475	PUBCHEM_CID_44484344	[H]OC([H])([H])[C@]([H])(N1C(=O)c2c([H])c(N([H])C(=O)C([H])([H])C([H])([H])C([H])([H])N(C([H])([H])[H])C([H])([H])[H])c([H])c([H])c2O[C@@]([H])(C([H])([H])N(C(=O)N([H])c2c(noc2C([H])([H])[H])C([H])([H])[H])C([H])([H])[H])[C@]([H])(C([H])([H])[H])C1([H])[H])C([H])([H])[H]	0 (Inactive)	0	0	0
1476	PUBCHEM_CID_44484346	[H]OC([H])([H])[C@]([H])(N1C(=O)c2c([H])c(N([H])C(=O)C([H])([H])C([H])([H])N3C([H])([H])C([H])([H])OC([H])([H])C3([H])[H])c([H])c([H])c2O[C@@]([H])(C([H])([H])N(C([H])([H])[H])C([H])([H])c2c([H])c([H])c(OC([H])([H])[H])c([H])c2[H])[C@]([H])(C([H])([H])[H])C1([H])[H])C([H])([H])[H]	0 (Inactive)	0	0	0
1477	PUBCHEM_CID_44484347	[H]OC([H])([H])[C@]([H])(N1C(=O)c2c([H])c(N([H])C(=O)N([H])c3c([H])c([H])c([H])c([H])c3[H])c([H])c([H])c2O[C@@]([H])(C([H])([H])N(C([H])([H])[H])C([H])([H])c2c([H])c([H])nc([H])c2[H])[C@]([H])(C([H])([H])[H])C1([H])[H])C([H])([H])[H]	0 (Inactive)	0	0	0
1478	PUBCHEM_CID_44484348	[H]OC([H])([H])[C@]([H])(N1C(=O)c2c([H])c(N([H])C(=O)N([H])c3c([H])c([H])c4OC([H])([H])Oc4c3[H])c([H])c([H])c2O[C@@]([H])(C([H])([H])N(C([H])([H])[H])C([H])([H])[H])[C@]([H])(C([H])([H])[H])C1([H])[H])C([H])([H])[H]	0 (Inactive)	0	0	0
1479	PUBCHEM_CID_44484351	[H]OC([H])([H])[C@]([H])(N1C(=O)c2c([H])c(N([H])C(=O)N([H])c3c([H])c([H])c(OC([H])([H])[H])c([H])c3[H])c([H])c([H])c2O[C@@]([H])(C([H])([H])N([H])C([H])([H])[H])[C@]([H])(C([H])([H])[H])C1([H])[H])C([H])([H])[H]	0 (Inactive)	0	0	0
1480	PUBCHEM_CID_44484352	[H]OC([H])([H])[C@@]([H])(N1C(=O)c2c([H])c(N([H])C(=O)C([H])([H])C([H])([H])C([H])([H])N(C([H])([H])[H])C([H])([H])[H])c([H])c([H])c2O[C@]([H])(C([H])([H])N(C(=O)N([H])c2c(noc2C([H])([H])[H])C([H])([H])[H])C([H])([H])[H])[C@@]([H])(C([H])([H])[H])C1([H])[H])C([H])([H])[H]	0 (Inactive)	0	0	0
1481	PUBCHEM_CID_44484353	[H]OC([H])([H])[C@@]([H])(N1C(=O)c2c([H])c(N([H])C(=O)N([H])c3c([H])c([H])c([H])c([H])c3[H])c([H])c([H])c2O[C@]([H])(C([H])([H])N(C([H])([H])[H])C([H])([H])C2([H])C([H])([H])C2([H])[H])[C@]([H])(C([H])([H])[H])C1([H])[H])C([H])([H])[H]	0 (Inactive)	0	0	0
1482	PUBCHEM_CID_44484354	[H]OC([H])([H])[C@]([H])(N1C(=O)c2c([H])c([H])c([H])c(N([H])C(=O)N([H])c3c(noc3C([H])([H])[H])C([H])([H])[H])c2O[C@]([H])(C([H])([H])N(C(=O)N([H])c2c(noc2C([H])([H])[H])C([H])([H])[H])C([H])([H])[H])[C@@]([H])(C([H])([H])[H])C1([H])[H])C([H])([H])[H]	0 (Inactive)	0	0	0
1483	PUBCHEM_CID_44484355	[H]OC([H])([H])[C@]([H])(N1C(=O)c2c([H])c([H])c([H])c(N(C([H])([H])[H])C([H])([H])[H])c2O[C@]([H])(C([H])([H])N([H])C([H])([H])[H])[C@@]([H])(C([H])([H])[H])C1([H])[H])C([H])([H])[H]	0 (Inactive)	0	0	0
1484	PUBCHEM_CID_44202708	[H]OC([H])([H])[C@]([H])(N1C(=O)c2c([H])c([H])c([H])c(N([H])S(=O)(=O)c3nc([H])n(c3[H])C([H])([H])[H])c2O[C@]([H])(C([H])([H])N(C([H])([H])[H])C([H])([H])[H])[C@@]([H])(C([H])([H])[H])C1([H])[H])C([H])([H])[H]	0 (Inactive)	0	0	0
1485	PUBCHEM_CID_44484357	[H]OC([H])([H])[C@]([H])(N1C(=O)c2c([H])c([H])c([H])c(N(C([H])([H])[H])C([H])([H])[H])c2O[C@]([H])(C([H])([H])N(C(=O)N([H])c2c([H])c([H])c(OC([H])([H])[H])c([H])c2[H])C([H])([H])[H])[C@@]([H])(C([H])([H])[H])C1([H])[H])C([H])([H])[H]	0 (Inactive)	0	0	0
1486	PUBCHEM_CID_44484358	[H]OC([H])([H])[C@]([H])(N1C(=O)c2c([H])c([H])c([H])c(N([H])C(=O)N([H])c3c([H])c([H])c(c([H])c3[H])C(F)(F)F)c2O[C@]([H])(C([H])([H])N(C([H])([H])[H])C([H])([H])C2([H])C([H])([H])C2([H])[H])[C@@]([H])(C([H])([H])[H])C1([H])[H])C([H])([H])[H]	0 (Inactive)	0	0	0
1487	PUBCHEM_CID_44484360	[H]OC([H])([H])[C@]([H])(N1C(=O)c2c([H])c([H])c([H])c(N([H])S(=O)(=O)c3nc([H])n(c3[H])C([H])([H])[H])c2O[C@]([H])(C([H])([H])N([H])C([H])([H])[H])[C@@]([H])(C([H])([H])[H])C1([H])[H])C([H])([H])[H]	0 (Inactive)	0	0	0
1488	PUBCHEM_CID_44484361	[H]OC([H])([H])[C@]([H])(N1C(=O)c2c([H])c([H])c([H])c(N([H])C(=O)c3c([H])c(nn3C([H])([H])[H])C([H])([H])[H])c2O[C@]([H])(C([H])([H])N(C([H])([H])[H])C([H])([H])c2c([H])c([H])c(OC([H])([H])[H])c([H])c2[H])[C@@]([H])(C([H])([H])[H])C1([H])[H])C([H])([H])[H]	0 (Inactive)	0	0	0
1489	PUBCHEM_CID_44202467	[H]OC([H])([H])[C@]([H])(N1C(=O)c2c([H])c([H])c([H])c(N([H])C(=O)N([H])c3c(noc3C([H])([H])[H])C([H])([H])[H])c2O[C@]([H])(C([H])([H])N(C([H])([H])[H])S(=O)(=O)c2nc([H])n(c2[H])C([H])([H])[H])[C@@]([H])(C([H])([H])[H])C1([H])[H])C([H])([H])[H]	0 (Inactive)	0	0	0
1490	PUBCHEM_CID_44484362	[H]OC([H])([H])[C@]([H])(N1C(=O)c2c([H])c([H])c([H])c(N([H])S(=O)(=O)C([H])([H])[H])c2O[C@]([H])(C([H])([H])N(C([H])([H])[H])C([H])([H])C2([H])C([H])([H])C2([H])[H])[C@@]([H])(C([H])([H])[H])C1([H])[H])C([H])([H])[H]	0 (Inactive)	0	0	0
1491	PUBCHEM_CID_44484363	[H]OC([H])([H])[C@]([H])(N1C(=O)c2c([H])c([H])c([H])c(N(C([H])([H])[H])C([H])([H])[H])c2O[C@]([H])(C([H])([H])N(C([H])([H])[H])S(=O)(=O)c2c([H])c([H])c(Cl)c([H])c2[H])[C@@]([H])(C([H])([H])[H])C1([H])[H])C([H])([H])[H]	0 (Inactive)	0	0	0
1492	PUBCHEM_CID_44484364	[H]OC([H])([H])[C@]([H])(N1C(=O)c2c([H])c([H])c([H])c(N([H])S(=O)(=O)C([H])([H])[H])c2O[C@]([H])(C([H])([H])N(C([H])([H])[H])C([H])([H])c2c([H])c([H])c(OC([H])([H])[H])c([H])c2[H])[C@@]([H])(C([H])([H])[H])C1([H])[H])C([H])([H])[H]	0 (Inactive)	0	0	0
1493	PUBCHEM_CID_44202976	[H]OC([H])([H])[C@]([H])(N1C(=O)c2c([H])c([H])c([H])c(N([H])S(=O)(=O)c3c([H])c([H])c(OC([H])([H])[H])c([H])c3[H])c2O[C@]([H])(C([H])([H])N(C([H])([H])[H])S(=O)(=O)c2nc([H])n(c2[H])C([H])([H])[H])[C@@]([H])(C([H])([H])[H])C1([H])[H])C([H])([H])[H]	0 (Inactive)	0	0	0
1494	PUBCHEM_CID_44484366	[H]OC([H])([H])[C@]([H])(N1C(=O)c2c([H])c([H])c([H])c(N([H])C(=O)c3nc([H])c([H])nc3[H])c2O[C@]([H])(C([H])([H])N(C(=O)N([H])c2c(noc2C([H])([H])[H])C([H])([H])[H])C([H])([H])[H])[C@@]([H])(C([H])([H])[H])C1([H])[H])C([H])([H])[H]	0 (Inactive)	0	0	0
1495	PUBCHEM_CID_44484367	[H]OC([H])([H])[C@]([H])(N1C(=O)c2c([H])c([H])c([H])c(N([H])C(=O)c3nc4c([H])c([H])c([H])c([H])c4s3)c2O[C@]([H])(C([H])([H])N(C(=O)N([H])c2c(noc2C([H])([H])[H])C([H])([H])[H])C([H])([H])[H])[C@@]([H])(C([H])([H])[H])C1([H])[H])C([H])([H])[H]	0 (Inactive)	0	0	0
1496	PUBCHEM_CID_44484368	[H]OC([H])([H])[C@]([H])(N1C(=O)c2c([H])c([H])c([H])c(N([H])C(=O)C3([H])C([H])([H])C([H])([H])OC([H])([H])C3([H])[H])c2O[C@]([H])(C([H])([H])N([H])C([H])([H])[H])[C@@]([H])(C([H])([H])[H])C1([H])[H])C([H])([H])[H]	0 (Inactive)	0	0	0
1497	PUBCHEM_CID_44202757	[H]OC([H])([H])[C@]([H])(N1C(=O)c2c([H])c([H])c([H])c(N([H])C(=O)c3c([H])c([H])nc([H])c3[H])c2O[C@]([H])(C([H])([H])N(C(=O)N([H])c2c(noc2C([H])([H])[H])C([H])([H])[H])C([H])([H])[H])[C@@]([H])(C([H])([H])[H])C1([H])[H])C([H])([H])[H]	0 (Inactive)	0	0	0
1498	PUBCHEM_CID_44484370	[H]OC([H])([H])[C@]([H])(N1C(=O)c2c([H])c([H])c([H])c(N([H])C(=O)C3([H])C([H])([H])C([H])([H])OC([H])([H])C3([H])[H])c2O[C@]([H])(C([H])([H])N(C(=O)N([H])c2c(noc2C([H])([H])[H])C([H])([H])[H])C([H])([H])[H])[C@@]([H])(C([H])([H])[H])C1([H])[H])C([H])([H])[H]	0 (Inactive)	0	0	0
1500	PUBCHEM_CID_44484371	[H]OC([H])([H])[C@]([H])(N1C(=O)c2c([H])c([H])c([H])c(N([H])C(=O)N([H])c3c([H])c([H])c([H])c4c([H])c([H])c([H])c([H])c34)c2O[C@]([H])(C([H])([H])N(C(=O)N([H])C2([H])C([H])([H])C([H])([H])C([H])([H])C([H])([H])C2([H])[H])C([H])([H])[H])[C@@]([H])(C([H])([H])[H])C1([H])[H])C([H])([H])[H]	0 (Inactive)	0	0	0
1501	PUBCHEM_CID_44484372	[H]OC([H])([H])[C@@]([H])(N1C(=O)c2c([H])c([H])c([H])c(N([H])S(=O)(=O)c3sc([H])c([H])c3[H])c2O[C@@]([H])(C([H])([H])N([H])C([H])([H])[H])[C@]([H])(C([H])([H])[H])C1([H])[H])C([H])([H])[H]	0 (Inactive)	0	0	0
1502	PUBCHEM_CID_44484373	[H]OC([H])([H])[C@@]([H])(N1C(=O)c2c([H])c([H])c([H])c(N([H])C(=O)N([H])c3c([H])c([H])c(OC([H])([H])[H])c([H])c3[H])c2O[C@@]([H])(C([H])([H])N(C(=O)N([H])c2c([H])c([H])c([H])c([H])c2[H])C([H])([H])[H])[C@]([H])(C([H])([H])[H])C1([H])[H])C([H])([H])[H]	0 (Inactive)	0	0	0
1503	PUBCHEM_CID_44484374	[H]OC([H])([H])[C@@]([H])(N1C(=O)c2c([H])c([H])c([H])c(N([H])C(=O)N([H])c3c([H])c([H])c(OC([H])([H])[H])c([H])c3[H])c2O[C@@]([H])(C([H])([H])N(C([H])([H])[H])C([H])([H])c2c([H])c([H])c(OC([H])([H])[H])c([H])c2[H])[C@]([H])(C([H])([H])[H])C1([H])[H])C([H])([H])[H]	0 (Inactive)	0	0	0
1504	PUBCHEM_CID_44484375	[H]OC([H])([H])[C@@]([H])(N1C(=O)c2c([H])c([H])c([H])c(N([H])S(=O)(=O)c3c([H])c([H])c(Cl)c([H])c3[H])c2O[C@@]([H])(C([H])([H])N(C([H])([H])[H])C([H])([H])[H])[C@]([H])(C([H])([H])[H])C1([H])[H])C([H])([H])[H]	0 (Inactive)	0	0	0
1505	PUBCHEM_CID_44484376	[H]OC([H])([H])[C@@]([H])(N1C(=O)c2c([H])c([H])c([H])c(N(C([H])([H])[H])C([H])([H])[H])c2O[C@@]([H])(C([H])([H])N(C(=O)N([H])c2c([H])c([H])c([H])c3c([H])c([H])c([H])c([H])c23)C([H])([H])[H])[C@]([H])(C([H])([H])[H])C1([H])[H])C([H])([H])[H]	0 (Inactive)	0	0	0
1506	PUBCHEM_CID_44484378	[H]OC([H])([H])[C@@]([H])(N1C(=O)c2c([H])c([H])c([H])c(N([H])C(=O)N([H])c3c(noc3C([H])([H])[H])C([H])([H])[H])c2O[C@@]([H])(C([H])([H])N(C([H])([H])[H])S(=O)(=O)c2nc([H])n(c2[H])C([H])([H])[H])[C@]([H])(C([H])([H])[H])C1([H])[H])C([H])([H])[H]	0 (Inactive)	0	0	0
1507	PUBCHEM_CID_44484379	[H]OC([H])([H])[C@@]([H])(N1C(=O)c2c([H])c([H])c([H])c(N([H])C(=O)N([H])c3c([H])c([H])c([H])c4c([H])c([H])c([H])c([H])c34)c2O[C@@]([H])(C([H])([H])N(C([H])([H])[H])C([H])([H])C2([H])C([H])([H])C2([H])[H])[C@]([H])(C([H])([H])[H])C1([H])[H])C([H])([H])[H]	0 (Inactive)	0	0	0
1508	PUBCHEM_CID_44484380	[H]OC([H])([H])[C@@]([H])(N1C(=O)c2c([H])c([H])c([H])c(N([H])C(=O)c3nc([H])c([H])nc3[H])c2O[C@@]([H])(C([H])([H])N([H])C([H])([H])[H])[C@]([H])(C([H])([H])[H])C1([H])[H])C([H])([H])[H]	0 (Inactive)	0	0	0
1509	PUBCHEM_CID_44484382	[H]OC([H])([H])[C@@]([H])(N1C(=O)c2c([H])c([H])c([H])c(N(C([H])([H])[H])C([H])([H])[H])c2O[C@@]([H])(C([H])([H])N(C(=O)N([H])C2([H])C([H])([H])C([H])([H])C([H])([H])C([H])([H])C2([H])[H])C([H])([H])[H])[C@]([H])(C([H])([H])[H])C1([H])[H])C([H])([H])[H]	0 (Inactive)	0	0	0
1510	PUBCHEM_CID_44484385	[H]OC([H])([H])[C@@]([H])(N1C(=O)c2c([H])c([H])c([H])c(N([H])S(=O)(=O)c3c([H])c([H])c(OC([H])([H])[H])c([H])c3[H])c2O[C@@]([H])(C([H])([H])N(C([H])([H])[H])C([H])([H])c2c([H])c([H])nc([H])c2[H])[C@]([H])(C([H])([H])[H])C1([H])[H])C([H])([H])[H]	0 (Inactive)	0	0	0
1511	PUBCHEM_CID_44484386	[H]OC([H])([H])[C@@]([H])(N1C(=O)c2c([H])c([H])c([H])c(N([H])S(=O)(=O)c3c([H])c([H])c(OC([H])([H])[H])c([H])c3[H])c2O[C@@]([H])(C([H])([H])N(C([H])([H])[H])S(=O)(=O)c2sc([H])c([H])c2[H])[C@]([H])(C([H])([H])[H])C1([H])[H])C([H])([H])[H]	0 (Inactive)	0	0	0
1512	PUBCHEM_CID_44484387	[H]OC([H])([H])[C@@]([H])(N1C(=O)c2c([H])c([H])c([H])c(N([H])C(=O)N([H])c3c(noc3C([H])([H])[H])C([H])([H])[H])c2O[C@@]([H])(C([H])([H])N(C([H])([H])[H])C([H])([H])[H])[C@]([H])(C([H])([H])[H])C1([H])[H])C([H])([H])[H]	0 (Inactive)	0	0	0
1513	PUBCHEM_CID_44484388	[H]OC([H])([H])[C@@]([H])(N1C(=O)c2c([H])c([H])c([H])c(N([H])S(=O)(=O)c3c([H])c([H])c(OC([H])([H])[H])c([H])c3[H])c2O[C@@]([H])(C([H])([H])N(C([H])([H])[H])C([H])([H])C2([H])C([H])([H])C2([H])[H])[C@]([H])(C([H])([H])[H])C1([H])[H])C([H])([H])[H]	0 (Inactive)	0	0	0
1514	PUBCHEM_CID_44484390	[H]OC([H])([H])[C@@]([H])(N1C(=O)c2c([H])c([H])c([H])c(N([H])S(=O)(=O)C([H])([H])[H])c2O[C@@]([H])(C([H])([H])N(C([H])([H])[H])C([H])([H])C2([H])C([H])([H])C2([H])[H])[C@]([H])(C([H])([H])[H])C1([H])[H])C([H])([H])[H]	0 (Inactive)	0	0	0
1516	PUBCHEM_CID_44484393	[H]OC([H])([H])[C@@]([H])(N1C(=O)c2c([H])c([H])c([H])c(N([H])C(=O)c3c([H])c(nn3C([H])([H])[H])C([H])([H])[H])c2O[C@@]([H])(C([H])([H])N(C([H])([H])[H])C([H])([H])c2c([H])c([H])c(OC([H])([H])[H])c([H])c2[H])[C@]([H])(C([H])([H])[H])C1([H])[H])C([H])([H])[H]	0 (Inactive)	0	0	0
1517	PUBCHEM_CID_44484394	[H]OC([H])([H])[C@@]([H])(N1C(=O)c2c([H])c([H])c([H])c(N([H])C(=O)c3c([H])c([H])nc([H])c3[H])c2O[C@@]([H])(C([H])([H])N(C([H])([H])[H])C([H])([H])C2([H])C([H])([H])C2([H])[H])[C@]([H])(C([H])([H])[H])C1([H])[H])C([H])([H])[H]	0 (Inactive)	0	0	0
1518	PUBCHEM_CID_44484395	[H]OC([H])([H])[C@@]([H])(N1C(=O)c2c([H])c([H])c([H])c(N([H])S(=O)(=O)c3sc([H])c([H])c3[H])c2O[C@@]([H])(C([H])([H])N(C(=O)N([H])C2([H])C([H])([H])C([H])([H])C([H])([H])C([H])([H])C2([H])[H])C([H])([H])[H])[C@]([H])(C([H])([H])[H])C1([H])[H])C([H])([H])[H]	0 (Inactive)	0	0	0
1519	PUBCHEM_CID_44484396	[H]OC([H])([H])[C@@]([H])(N1C(=O)c2c([H])c([H])c([H])c(N([H])S(=O)(=O)c3nc([H])n(c3[H])C([H])([H])[H])c2O[C@@]([H])(C([H])([H])N(C([H])([H])[H])C([H])([H])c2c([H])c([H])c(OC([H])([H])[H])c([H])c2[H])[C@]([H])(C([H])([H])[H])C1([H])[H])C([H])([H])[H]	0 (Inactive)	0	0	0
1520	PUBCHEM_CID_44484397	[H]OC([H])([H])[C@@]([H])(N1C(=O)c2c([H])c([H])c([H])c(N([H])C(=O)c3nc([H])c([H])nc3[H])c2O[C@@]([H])(C([H])([H])N(C(=O)N([H])c2c(noc2C([H])([H])[H])C([H])([H])[H])C([H])([H])[H])[C@]([H])(C([H])([H])[H])C1([H])[H])C([H])([H])[H]	0 (Inactive)	0	0	0
1521	PUBCHEM_CID_44484398	[H]OC([H])([H])[C@@]([H])(N1C(=O)c2c([H])c([H])c([H])c(N([H])C(=O)c3c([H])c([H])nc([H])c3[H])c2O[C@@]([H])(C([H])([H])N(C([H])([H])[H])C([H])([H])c2c([H])c([H])c(OC([H])([H])[H])c([H])c2[H])[C@]([H])(C([H])([H])[H])C1([H])[H])C([H])([H])[H]	0 (Inactive)	0	0	0
1522	PUBCHEM_CID_44202659	[H]OC([H])([H])[C@@]([H])(N1C(=O)c2c([H])c([H])c([H])c(N([H])S(=O)(=O)c3c([H])c([H])c(F)c([H])c3[H])c2O[C@@]([H])(C([H])([H])N(C(=O)N([H])C2([H])C([H])([H])C([H])([H])C([H])([H])C([H])([H])C2([H])[H])C([H])([H])[H])[C@]([H])(C([H])([H])[H])C1([H])[H])C([H])([H])[H]	0 (Inactive)	0	0	0
1523	PUBCHEM_CID_44484399	[H]OC([H])([H])[C@@]([H])(N1C(=O)c2c([H])c([H])c([H])c(N([H])C(=O)c3c([H])c([H])nc([H])c3[H])c2O[C@@]([H])(C([H])([H])N(C(=O)N([H])c2c(noc2C([H])([H])[H])C([H])([H])[H])C([H])([H])[H])[C@]([H])(C([H])([H])[H])C1([H])[H])C([H])([H])[H]	0 (Inactive)	0	0	0
1524	PUBCHEM_CID_44484400	[H]OC([H])([H])[C@@]([H])(N1C(=O)c2c([H])c([H])c([H])c(N([H])S(=O)(=O)c3sc([H])c([H])c3[H])c2O[C@@]([H])(C([H])([H])N(C(=O)N([H])c2c([H])c([H])c(OC([H])([H])[H])c([H])c2[H])C([H])([H])[H])[C@]([H])(C([H])([H])[H])C1([H])[H])C([H])([H])[H]	0 (Inactive)	0	0	0
1525	PUBCHEM_CID_44484401	[H]OC([H])([H])[C@@]([H])(N1C(=O)c2c([H])c([H])c([H])c(N([H])S(=O)(=O)C([H])([H])[H])c2O[C@@]([H])(C([H])([H])N(C([H])([H])[H])S(=O)(=O)c2sc([H])c([H])c2[H])[C@]([H])(C([H])([H])[H])C1([H])[H])C([H])([H])[H]	0 (Inactive)	0	0	0
1526	PUBCHEM_CID_44484402	[H]OC([H])([H])[C@@]([H])(N1C(=O)c2c([H])c([H])c([H])c(N(C([H])([H])[H])C([H])([H])[H])c2O[C@@]([H])(C([H])([H])N(C([H])([H])[H])S(=O)(=O)c2c(noc2C([H])([H])[H])C([H])([H])[H])[C@]([H])(C([H])([H])[H])C1([H])[H])C([H])([H])[H]	0 (Inactive)	0	0	0
1527	PUBCHEM_CID_44484403	[H]OC([H])([H])[C@@]([H])(N1C(=O)c2c([H])c([H])c([H])c(N(C([H])([H])[H])C([H])([H])[H])c2O[C@@]([H])(C([H])([H])N(C(=O)N([H])c2c(noc2C([H])([H])[H])C([H])([H])[H])C([H])([H])[H])[C@]([H])(C([H])([H])[H])C1([H])[H])C([H])([H])[H]	0 (Inactive)	0	0	0
1528	PUBCHEM_CID_44484404	[H]OC([H])([H])[C@@]([H])(N1C(=O)c2c([H])c([H])c([H])c(N([H])C(=O)c3nc4c([H])c([H])c([H])c([H])c4s3)c2O[C@@]([H])(C([H])([H])N(C(=O)N([H])c2c(noc2C([H])([H])[H])C([H])([H])[H])C([H])([H])[H])[C@]([H])(C([H])([H])[H])C1([H])[H])C([H])([H])[H]	0 (Inactive)	0	0	0
1529	PUBCHEM_CID_44484405	[H]OC([H])([H])[C@@]([H])(N1C(=O)c2c([H])c([H])c([H])c(N([H])C(=O)N([H])c3c(noc3C([H])([H])[H])C([H])([H])[H])c2O[C@@]([H])(C([H])([H])N(C(=O)N([H])C2([H])C([H])([H])C([H])([H])C([H])([H])C([H])([H])C2([H])[H])C([H])([H])[H])[C@]([H])(C([H])([H])[H])C1([H])[H])C([H])([H])[H]	0 (Inactive)	0	0	0
1530	PUBCHEM_CID_44484408	[H]OC([H])([H])[C@@]([H])(N1C(=O)c2c([H])c([H])c([H])c(N([H])S(=O)(=O)c3nc([H])n(c3[H])C([H])([H])[H])c2O[C@@]([H])(C([H])([H])N(C(=O)N([H])c2c(noc2C([H])([H])[H])C([H])([H])[H])C([H])([H])[H])[C@]([H])(C([H])([H])[H])C1([H])[H])C([H])([H])[H]	0 (Inactive)	0	0	0
1531	PUBCHEM_CID_44484411	[H]OC([H])([H])[C@]([H])(N1C(=O)c2c([H])c([H])c([H])c(N(C([H])([H])[H])C([H])([H])[H])c2O[C@@]([H])(C([H])([H])N([H])C([H])([H])[H])[C@]([H])(C([H])([H])[H])C1([H])[H])C([H])([H])[H]	0 (Inactive)	0	0	0
1533	PUBCHEM_CID_44484413	[H]OC([H])([H])[C@]([H])(N1C(=O)c2c([H])c([H])c([H])c(N([H])S(=O)(=O)c3c([H])c([H])c(F)c([H])c3[H])c2O[C@@]([H])(C([H])([H])N(C(=O)N([H])C2([H])C([H])([H])C([H])([H])C([H])([H])C([H])([H])C2([H])[H])C([H])([H])[H])[C@]([H])(C([H])([H])[H])C1([H])[H])C([H])([H])[H]	0 (Inactive)	0	0	0
1534	PUBCHEM_CID_44484414	[H]OC([H])([H])[C@]([H])(N1C(=O)c2c([H])c([H])c([H])c(N([H])S(=O)(=O)c3nc([H])n(c3[H])C([H])([H])[H])c2O[C@@]([H])(C([H])([H])N(C([H])([H])[H])C([H])([H])c2c([H])c([H])c(OC([H])([H])[H])c([H])c2[H])[C@]([H])(C([H])([H])[H])C1([H])[H])C([H])([H])[H]	0 (Inactive)	0	0	0
1535	PUBCHEM_CID_44484415	[H]OC([H])([H])[C@]([H])(N1C(=O)c2c([H])c([H])c([H])c(N([H])C(=O)C3([H])C([H])([H])C([H])([H])OC([H])([H])C3([H])[H])c2O[C@@]([H])(C([H])([H])N(C([H])([H])[H])C([H])([H])c2c([H])c([H])c3OC([H])([H])Oc3c2[H])[C@]([H])(C([H])([H])[H])C1([H])[H])C([H])([H])[H]	0 (Inactive)	0	0	0
1536	PUBCHEM_CID_44484416	[H]OC([H])([H])[C@@]([H])(N1C(=O)c2c([H])c([H])c([H])c(N([H])C(=O)N([H])C([H])(C([H])([H])[H])C([H])([H])[H])c2O[C@]([H])(C([H])([H])N(C([H])([H])[H])C([H])([H])c2c([H])c([H])c(OC([H])([H])[H])c([H])c2[H])[C@@]([H])(C([H])([H])[H])C1([H])[H])C([H])([H])[H]	0 (Inactive)	0	0	0
1537	PUBCHEM_CID_44484417	[H]OC([H])([H])[C@@]([H])(N1C(=O)c2c([H])c([H])c([H])c(N([H])S(=O)(=O)c3sc([H])c([H])c3[H])c2O[C@]([H])(C([H])([H])N(C([H])([H])[H])S(=O)(=O)c2c([H])c([H])c(OC([H])([H])[H])c([H])c2[H])[C@@]([H])(C([H])([H])[H])C1([H])[H])C([H])([H])[H]	0 (Inactive)	0	0	0
1538	PUBCHEM_CID_44484419	[H]OC([H])([H])[C@]([H])(N1C(=O)c2c([H])c([H])c([H])c(N([H])C(=O)N([H])C3([H])C([H])([H])C([H])([H])C([H])([H])C([H])([H])C3([H])[H])c2O[C@@]([H])(C([H])([H])N(C([H])([H])[H])C([H])([H])[H])[C@@]([H])(C([H])([H])[H])C1([H])[H])C([H])([H])[H]	0 (Inactive)	0	0	0
1539	PUBCHEM_CID_44484420	[H]OC([H])([H])[C@]([H])(N1C(=O)c2c([H])c([H])c([H])c(N([H])S(=O)(=O)c3c(noc3C([H])([H])[H])C([H])([H])[H])c2O[C@@]([H])(C([H])([H])N(C([H])([H])[H])S(=O)(=O)c2c([H])c([H])c(OC([H])([H])[H])c([H])c2[H])[C@@]([H])(C([H])([H])[H])C1([H])[H])C([H])([H])[H]	0 (Inactive)	0	0	0
1540	PUBCHEM_CID_44484421	[H]OC([H])([H])[C@]([H])(N1C(=O)c2c([H])c([H])c([H])c(N([H])S(=O)(=O)c3c(noc3C([H])([H])[H])C([H])([H])[H])c2O[C@@]([H])(C([H])([H])N(C(=O)N([H])C2([H])C([H])([H])C([H])([H])C([H])([H])C([H])([H])C2([H])[H])C([H])([H])[H])[C@@]([H])(C([H])([H])[H])C1([H])[H])C([H])([H])[H]	0 (Inactive)	0	0	0
1541	PUBCHEM_CID_44484422	[H]OC([H])([H])[C@]([H])(N1C(=O)c2c([H])c([H])c([H])c(N([H])S(=O)(=O)c3c(noc3C([H])([H])[H])C([H])([H])[H])c2O[C@@]([H])(C([H])([H])N(C([H])([H])[H])C([H])([H])C2([H])C([H])([H])C2([H])[H])[C@@]([H])(C([H])([H])[H])C1([H])[H])C([H])([H])[H]	0 (Inactive)	0	0	0
1542	PUBCHEM_CID_44484423	[H]OC([H])([H])[C@]([H])(N1C(=O)c2c([H])c([H])c([H])c(N(C([H])([H])[H])C([H])([H])[H])c2O[C@@]([H])(C([H])([H])N(C([H])([H])[H])C([H])([H])C2([H])C([H])([H])C2([H])[H])[C@@]([H])(C([H])([H])[H])C1([H])[H])C([H])([H])[H]	0 (Inactive)	0	0	0
1543	PUBCHEM_CID_44484424	[H]OC([H])([H])[C@@]([H])(N1C(=O)c2c([H])c([H])c([H])c(N([H])S(=O)(=O)c3c(noc3C([H])([H])[H])C([H])([H])[H])c2O[C@]([H])(C([H])([H])N(C([H])([H])[H])C([H])([H])C2([H])C([H])([H])C2([H])[H])[C@]([H])(C([H])([H])[H])C1([H])[H])C([H])([H])[H]	0 (Inactive)	0	0	0
1544	PUBCHEM_CID_44484427	[H]OC([H])([H])[C@]([H])(N1C(=O)c2c([H])c([H])c([H])c(N([H])C(=O)N([H])c3c([H])c([H])c([H])c4c([H])c([H])c([H])c([H])c34)c2O[C@]([H])(C([H])([H])N(C([H])([H])[H])C([H])([H])c2c([H])c([H])c(OC([H])([H])[H])c([H])c2[H])[C@]([H])(C([H])([H])[H])C1([H])[H])C([H])([H])[H]	0 (Inactive)	0	0	0
1545	PUBCHEM_CID_44484429	[H]OC([H])([H])[C@]([H])(N1C(=O)C([H])([H])c2c([H])c(N([H])C(=O)N([H])c3c([H])c([H])c([H])c([H])c3[H])c([H])c([H])c2O[C@@]([H])(C([H])([H])N(C([H])([H])[H])S(=O)(=O)c2c(noc2C([H])([H])[H])C([H])([H])[H])[C@@]([H])(C([H])([H])[H])C1([H])[H])C([H])([H])[H]	0 (Inactive)	0	0	0
1546	PUBCHEM_CID_44484430	[H]OC([H])([H])[C@]([H])(N1C(=O)C([H])([H])c2c([H])c(N([H])C(=O)C([H])([H])c3c([H])n(c4c([H])c([H])c([H])c([H])c34)C([H])([H])[H])c([H])c([H])c2O[C@@]([H])(C([H])([H])N(C([H])([H])[H])S(=O)(=O)c2c(noc2C([H])([H])[H])C([H])([H])[H])[C@@]([H])(C([H])([H])[H])C1([H])[H])C([H])([H])[H]	0 (Inactive)	0	0	0
1547	PUBCHEM_CID_44484432	[H]OC([H])([H])[C@]([H])(N1C(=O)C([H])([H])c2c([H])c(N([H])C(=O)C([H])([H])c3c([H])n(c4c([H])c([H])c([H])c([H])c34)C([H])([H])[H])c([H])c([H])c2O[C@@]([H])(C([H])([H])N(C([H])([H])[H])C([H])([H])c2c([H])c([H])c(OC([H])([H])[H])c([H])c2[H])[C@@]([H])(C([H])([H])[H])C1([H])[H])C([H])([H])[H]	0 (Inactive)	0	0	0
1548	PUBCHEM_CID_44484434	[H]OC([H])([H])[C@]([H])(N1C(=O)C([H])([H])c2c([H])c(N([H])S(=O)(=O)c3c([H])c([H])c([H])c([H])c3[H])c([H])c([H])c2O[C@@]([H])(C([H])([H])N(C([H])([H])[H])C([H])([H])c2c([H])c([H])c3OC([H])([H])Oc3c2[H])[C@@]([H])(C([H])([H])[H])C1([H])[H])C([H])([H])[H]	0 (Inactive)	0	0	0
1549	PUBCHEM_CID_44484436	[H]OC([H])([H])[C@]([H])(N1C(=O)C([H])([H])c2c([H])c(N([H])C(=O)C([H])([H])C([H])([H])N3C([H])([H])C([H])([H])OC([H])([H])C3([H])[H])c([H])c([H])c2O[C@@]([H])(C([H])([H])N(C([H])([H])[H])C([H])([H])c2c([H])c([H])c(c([H])c2[H])-c2c([H])c([H])c([H])c([H])c2[H])[C@@]([H])(C([H])([H])[H])C1([H])[H])C([H])([H])[H]	0 (Inactive)	0	0	0
1550	PUBCHEM_CID_44484438	[H]OC([H])([H])[C@]([H])(N1C(=O)C([H])([H])c2c([H])c(N([H])S(=O)(=O)C([H])([H])[H])c([H])c([H])c2O[C@@]([H])(C([H])([H])N(C([H])([H])[H])C([H])([H])c2c([H])c([H])c(c([H])c2[H])-c2c([H])c([H])c([H])c([H])c2[H])[C@@]([H])(C([H])([H])[H])C1([H])[H])C([H])([H])[H]	0 (Inactive)	0	0	0
1551	PUBCHEM_CID_44484444	[H]OC([H])([H])[C@]([H])(N1C(=O)C([H])([H])c2c([H])c(N([H])C(=O)C([H])([H])C([H])([H])C(F)(F)F)c([H])c([H])c2O[C@@]([H])(C([H])([H])N(C([H])([H])[H])C([H])([H])c2c([H])c([H])c3OC([H])([H])Oc3c2[H])[C@@]([H])(C([H])([H])[H])C1([H])[H])C([H])([H])[H]	0 (Inactive)	0	0	0
1552	PUBCHEM_CID_44484445	[H]OC([H])([H])[C@]([H])(N1C(=O)C([H])([H])c2c([H])c(N([H])S(=O)(=O)c3c([H])c([H])c([H])c([H])c3[H])c([H])c([H])c2O[C@@]([H])(C([H])([H])N(C(=O)N([H])C2([H])C([H])([H])C([H])([H])C([H])([H])C([H])([H])C2([H])[H])C([H])([H])[H])[C@@]([H])(C([H])([H])[H])C1([H])[H])C([H])([H])[H]	0 (Inactive)	0	0	0
1553	PUBCHEM_CID_44484446	[H]OC([H])([H])[C@]([H])(N1C(=O)C([H])([H])c2c([H])c(N([H])C(=O)C3([H])C([H])([H])C3([H])[H])c([H])c([H])c2O[C@@]([H])(C([H])([H])N(C(=O)N([H])c2c([H])c([H])c([H])c([H])c2[H])C([H])([H])[H])[C@@]([H])(C([H])([H])[H])C1([H])[H])C([H])([H])[H]	0 (Inactive)	0	0	0
1554	PUBCHEM_CID_44484447	[H]OC([H])([H])[C@]([H])(N1C(=O)C([H])([H])c2c([H])c(N([H])C(=O)c3c([H])c([H])nc([H])c3[H])c([H])c([H])c2O[C@@]([H])(C([H])([H])N(C(=O)N([H])c2c(noc2C([H])([H])[H])C([H])([H])[H])C([H])([H])[H])[C@@]([H])(C([H])([H])[H])C1([H])[H])C([H])([H])[H]	0 (Inactive)	0	0	0
1555	PUBCHEM_CID_44484448	[H]OC([H])([H])[C@]([H])(N1C(=O)C([H])([H])c2c([H])c(N([H])C(=O)N([H])C([H])(C([H])([H])[H])C([H])([H])[H])c([H])c([H])c2O[C@@]([H])(C([H])([H])N(C([H])([H])[H])C([H])([H])c2c([H])c([H])c(c([H])c2[H])-c2c([H])c([H])c([H])c([H])c2[H])[C@@]([H])(C([H])([H])[H])C1([H])[H])C([H])([H])[H]	0 (Inactive)	0	0	0
1556	PUBCHEM_CID_44484450	[H]OC([H])([H])[C@]([H])(N1C(=O)C([H])([H])c2c([H])c(N([H])C(=O)C3([H])C([H])([H])C3([H])[H])c([H])c([H])c2O[C@@]([H])(C([H])([H])N(C(=O)N([H])c2c([H])c([H])c([H])c3c([H])c([H])c([H])c([H])c23)C([H])([H])[H])[C@@]([H])(C([H])([H])[H])C1([H])[H])C([H])([H])[H]	0 (Inactive)	0	0	0
1557	PUBCHEM_CID_44484451	[H]OC([H])([H])[C@]([H])(N1C(=O)C([H])([H])c2c([H])c(N([H])S(=O)(=O)c3c(noc3C([H])([H])[H])C([H])([H])[H])c([H])c([H])c2O[C@@]([H])(C([H])([H])N(C(=O)N([H])c2c([H])c([H])c(c([H])c2[H])C(F)(F)F)C([H])([H])[H])[C@@]([H])(C([H])([H])[H])C1([H])[H])C([H])([H])[H]	0 (Inactive)	0	0	0
1558	PUBCHEM_CID_44484452	[H]OC([H])([H])[C@]([H])(N1C(=O)C([H])([H])c2c([H])c(N([H])C(=O)C3([H])C([H])([H])C3([H])[H])c([H])c([H])c2O[C@@]([H])(C([H])([H])N(C([H])([H])[H])S(=O)(=O)c2c([H])c([H])c(c([H])c2[H])C([H])([H])[H])[C@@]([H])(C([H])([H])[H])C1([H])[H])C([H])([H])[H]	0 (Inactive)	0	0	0
1559	PUBCHEM_CID_44484454	[H]OC([H])([H])[C@@]([H])(N1C(=O)C([H])([H])c2c([H])c(N([H])C(=O)C([H])([H])c3c([H])c([H])c([H])c([H])c3[H])c([H])c([H])c2O[C@]([H])(C([H])([H])N([H])C([H])([H])[H])[C@]([H])(C([H])([H])[H])C1([H])[H])C([H])([H])[H]	0 (Inactive)	0	0	0
1560	PUBCHEM_CID_44484456	[H]OC([H])([H])[C@@]([H])(N1C(=O)C([H])([H])c2c([H])c(N([H])C(=O)C([H])([H])c3c([H])n(c4c([H])c([H])c([H])c([H])c34)C([H])([H])[H])c([H])c([H])c2O[C@]([H])(C([H])([H])N(C([H])([H])[H])S(=O)(=O)c2c(noc2C([H])([H])[H])C([H])([H])[H])[C@]([H])(C([H])([H])[H])C1([H])[H])C([H])([H])[H]	0 (Inactive)	0	0	0
1561	PUBCHEM_CID_44484457	[H]OC([H])([H])[C@@]([H])(N1C(=O)C([H])([H])c2c([H])c(N([H])S(=O)(=O)c3sc([H])c([H])c3[H])c([H])c([H])c2O[C@]([H])(C([H])([H])N([H])C([H])([H])[H])[C@]([H])(C([H])([H])[H])C1([H])[H])C([H])([H])[H]	0 (Inactive)	0	0	0
1562	PUBCHEM_CID_44484458	[H]OC([H])([H])[C@@]([H])(N1C(=O)C([H])([H])c2c([H])c(N([H])S(=O)(=O)c3sc([H])c([H])c3[H])c([H])c([H])c2O[C@]([H])(C([H])([H])N(C([H])([H])[H])C([H])([H])c2c([H])c([H])c([H])c([H])c2[H])[C@]([H])(C([H])([H])[H])C1([H])[H])C([H])([H])[H]	0 (Inactive)	0	0	0
1563	PUBCHEM_CID_44484459	[H]OC([H])([H])[C@@]([H])(N1C(=O)C([H])([H])c2c([H])c(N([H])C(=O)N([H])c3c([H])c([H])c4OC([H])([H])Oc4c3[H])c([H])c([H])c2O[C@]([H])(C([H])([H])N([H])C([H])([H])[H])[C@]([H])(C([H])([H])[H])C1([H])[H])C([H])([H])[H]	0 (Inactive)	0	0	0
1564	PUBCHEM_CID_44484462	[H]OC([H])([H])[C@@]([H])(N1C(=O)C([H])([H])c2c([H])c(N([H])S(=O)(=O)c3c([H])c([H])c([H])c([H])c3[H])c([H])c([H])c2O[C@]([H])(C([H])([H])N(C([H])([H])[H])C([H])([H])c2c([H])c([H])c3OC([H])([H])Oc3c2[H])[C@]([H])(C([H])([H])[H])C1([H])[H])C([H])([H])[H]	0 (Inactive)	0	0	0
1565	PUBCHEM_CID_44484463	[H]OC([H])([H])[C@@]([H])(N1C(=O)C([H])([H])c2c([H])c(N([H])S(=O)(=O)c3sc([H])c([H])c3[H])c([H])c([H])c2O[C@]([H])(C([H])([H])N(C([H])([H])[H])S(=O)(=O)c2c(noc2C([H])([H])[H])C([H])([H])[H])[C@]([H])(C([H])([H])[H])C1([H])[H])C([H])([H])[H]	0 (Inactive)	0	0	0
1566	PUBCHEM_CID_44484467	[H]OC([H])([H])[C@@]([H])(N1C(=O)C([H])([H])c2c([H])c(N([H])C(=O)c3c([H])c([H])nc([H])c3[H])c([H])c([H])c2O[C@]([H])(C([H])([H])N(C([H])([H])[H])S(=O)(=O)c2c([H])c([H])c([H])c([H])c2[H])[C@]([H])(C([H])([H])[H])C1([H])[H])C([H])([H])[H]	0 (Inactive)	0	0	0
1567	PUBCHEM_CID_44484470	[H]OC([H])([H])[C@@]([H])(N1C(=O)C([H])([H])c2c([H])c(N([H])C(=O)N([H])C([H])(C([H])([H])[H])C([H])([H])[H])c([H])c([H])c2O[C@]([H])(C([H])([H])N(C([H])([H])[H])C([H])([H])c2c([H])c([H])c(c([H])c2[H])-c2c([H])c([H])c([H])c([H])c2[H])[C@]([H])(C([H])([H])[H])C1([H])[H])C([H])([H])[H]	0 (Inactive)	0	0	0
1568	PUBCHEM_CID_44484472	[H]OC([H])([H])[C@@]([H])(N1C(=O)C([H])([H])c2c([H])c(N([H])S(=O)(=O)c3c([H])c([H])c([H])c([H])c3[H])c([H])c([H])c2O[C@]([H])(C([H])([H])N(C(=O)N([H])C2([H])C([H])([H])C([H])([H])C([H])([H])C([H])([H])C2([H])[H])C([H])([H])[H])[C@]([H])(C([H])([H])[H])C1([H])[H])C([H])([H])[H]	0 (Inactive)	0	0	0
1569	PUBCHEM_CID_44484473	[H]OC([H])([H])[C@@]([H])(N1C(=O)C([H])([H])c2c([H])c(N([H])C(=O)C3([H])C([H])([H])C3([H])[H])c([H])c([H])c2O[C@]([H])(C([H])([H])N(C(=O)N([H])c2c([H])c([H])c([H])c3c([H])c([H])c([H])c([H])c23)C([H])([H])[H])[C@]([H])(C([H])([H])[H])C1([H])[H])C([H])([H])[H]	0 (Inactive)	0	0	0
1570	PUBCHEM_CID_44484474	[H]OC([H])([H])[C@@]([H])(N1C(=O)C([H])([H])c2c([H])c(N([H])C(=O)C([H])([H])C([H])([H])N3C([H])([H])C([H])([H])OC([H])([H])C3([H])[H])c([H])c([H])c2O[C@]([H])(C([H])([H])N(C([H])([H])[H])C([H])([H])c2c([H])c([H])c(c([H])c2[H])-c2c([H])c([H])c([H])c([H])c2[H])[C@]([H])(C([H])([H])[H])C1([H])[H])C([H])([H])[H]	0 (Inactive)	0	0	0
1571	PUBCHEM_CID_44484476	[H]OC([H])([H])[C@@]([H])(N1C(=O)C([H])([H])c2c([H])c(N([H])C(=O)C([H])([H])C([H])([H])N3C([H])([H])C([H])([H])OC([H])([H])C3([H])[H])c([H])c([H])c2O[C@]([H])(C([H])([H])N([H])C([H])([H])[H])[C@]([H])(C([H])([H])[H])C1([H])[H])C([H])([H])[H]	0 (Inactive)	0	0	0
1572	PUBCHEM_CID_44484477	[H]OC([H])([H])[C@@]([H])(N1C(=O)C([H])([H])c2c([H])c(N([H])S(=O)(=O)c3c([H])c([H])c(c([H])c3[H])C([H])([H])[H])c([H])c([H])c2O[C@]([H])(C([H])([H])N(C([H])([H])[H])C([H])([H])c2c([H])c([H])nc([H])c2[H])[C@]([H])(C([H])([H])[H])C1([H])[H])C([H])([H])[H]	0 (Inactive)	0	0	0
1573	PUBCHEM_CID_44484478	[H]OC([H])([H])[C@@]([H])(N1C(=O)C([H])([H])c2c([H])c(N([H])C(=O)C([H])([H])c3c([H])c([H])c([H])c([H])c3[H])c([H])c([H])c2O[C@]([H])(C([H])([H])N(C([H])([H])[H])C([H])([H])c2c([H])c([H])c(OC([H])([H])[H])c([H])c2[H])[C@]([H])(C([H])([H])[H])C1([H])[H])C([H])([H])[H]	0 (Inactive)	0	0	0
1574	PUBCHEM_CID_44484479	[H]OC([H])([H])[C@@]([H])(N1C(=O)C([H])([H])c2c([H])c(N([H])C(=O)C([H])([H])n3nnnc3[H])c([H])c([H])c2O[C@]([H])(C([H])([H])N(C(=O)N([H])c2c([H])c([H])c([H])c3c([H])c([H])c([H])c([H])c23)C([H])([H])[H])[C@]([H])(C([H])([H])[H])C1([H])[H])C([H])([H])[H]	0 (Inactive)	0	0	0
1575	PUBCHEM_CID_44484480	[H]OC([H])([H])[C@@]([H])(N1C(=O)C([H])([H])c2c([H])c(N([H])C(=O)C([H])([H])c3c([H])n(c4c([H])c([H])c([H])c([H])c34)C([H])([H])[H])c([H])c([H])c2O[C@]([H])(C([H])([H])N(C(=O)N([H])c2c(noc2C([H])([H])[H])C([H])([H])[H])C([H])([H])[H])[C@]([H])(C([H])([H])[H])C1([H])[H])C([H])([H])[H]	0 (Inactive)	0	0	0
1576	PUBCHEM_CID_44484481	[H]OC([H])([H])[C@@]([H])(N1C(=O)C([H])([H])c2c([H])c(N([H])C(=O)N([H])c3c([H])c([H])c([H])c([H])c3[H])c([H])c([H])c2O[C@]([H])(C([H])([H])N(C(=O)N([H])c2c([H])c([H])c([H])c([H])c2[H])C([H])([H])[H])[C@]([H])(C([H])([H])[H])C1([H])[H])C([H])([H])[H]	0 (Inactive)	0	0	0
1577	PUBCHEM_CID_44484482	[H]OC([H])([H])[C@@]([H])(N1C(=O)C([H])([H])c2c([H])c(N([H])C(=O)C([H])([H])c3c([H])c([H])c([H])c([H])c3[H])c([H])c([H])c2O[C@]([H])(C([H])([H])N(C([H])([H])[H])S(=O)(=O)c2sc([H])c([H])c2[H])[C@]([H])(C([H])([H])[H])C1([H])[H])C([H])([H])[H]	0 (Inactive)	0	0	0
1578	PUBCHEM_CID_44484483	[H]OC([H])([H])[C@@]([H])(N1C(=O)C([H])([H])c2c([H])c(N([H])C(=O)C3([H])C([H])([H])C3([H])[H])c([H])c([H])c2O[C@]([H])(C([H])([H])N(C([H])([H])[H])C([H])([H])c2c([H])c([H])c(Cl)c(Cl)c2[H])[C@]([H])(C([H])([H])[H])C1([H])[H])C([H])([H])[H]	0 (Inactive)	0	0	0
1579	PUBCHEM_CID_44484484	[H]OC([H])([H])[C@@]([H])(N1C(=O)C([H])([H])c2c([H])c(N([H])S(=O)(=O)c3nc([H])n(c3[H])C([H])([H])[H])c([H])c([H])c2O[C@]([H])(C([H])([H])N(C([H])([H])[H])C([H])([H])c2c([H])c([H])c([H])c([H])c2[H])[C@]([H])(C([H])([H])[H])C1([H])[H])C([H])([H])[H]	0 (Inactive)	0	0	0
1580	PUBCHEM_CID_44484485	[H]OC([H])([H])[C@@]([H])(N1C(=O)C([H])([H])c2c([H])c(N([H])C(=O)C3([H])C([H])([H])C3([H])[H])c([H])c([H])c2O[C@]([H])(C([H])([H])N(C(=O)N([H])c2c([H])c([H])c([H])c([H])c2[H])C([H])([H])[H])[C@]([H])(C([H])([H])[H])C1([H])[H])C([H])([H])[H]	0 (Inactive)	0	0	0
1581	PUBCHEM_CID_44484486	[H]OC([H])([H])[C@@]([H])(N1C(=O)C([H])([H])c2c([H])c(N([H])C(=O)C([H])([H])C([H])([H])N3C([H])([H])C([H])([H])OC([H])([H])C3([H])[H])c([H])c([H])c2O[C@]([H])(C([H])([H])N(C([H])([H])[H])S(=O)(=O)c2sc([H])c([H])c2[H])[C@]([H])(C([H])([H])[H])C1([H])[H])C([H])([H])[H]	0 (Inactive)	0	0	0
1582	PUBCHEM_CID_44484488	[H]OC([H])([H])[C@@]([H])(N1C(=O)C([H])([H])c2c([H])c(N([H])C(=O)N([H])c3c([H])c([H])c4OC([H])([H])Oc4c3[H])c([H])c([H])c2O[C@]([H])(C([H])([H])N(C(=O)N([H])c2c(noc2C([H])([H])[H])C([H])([H])[H])C([H])([H])[H])[C@]([H])(C([H])([H])[H])C1([H])[H])C([H])([H])[H]	0 (Inactive)	0	0	0
1583	PUBCHEM_CID_44484489	[H]OC([H])([H])[C@@]([H])(N1C(=O)C([H])([H])c2c([H])c(N([H])S(=O)(=O)C([H])([H])[H])c([H])c([H])c2O[C@]([H])(C([H])([H])N(C(=O)N([H])c2c([H])c([H])c([H])c([H])c2[H])C([H])([H])[H])[C@]([H])(C([H])([H])[H])C1([H])[H])C([H])([H])[H]	0 (Inactive)	0	0	0
1584	PUBCHEM_CID_44484490	[H]OC([H])([H])[C@@]([H])(N1C(=O)C([H])([H])c2c([H])c(N([H])C(=O)N([H])c3c([H])c([H])c(OC([H])([H])[H])c([H])c3[H])c([H])c([H])c2O[C@]([H])(C([H])([H])N(C([H])([H])[H])S(=O)(=O)c2c([H])c([H])c(c([H])c2[H])C([H])([H])[H])[C@]([H])(C([H])([H])[H])C1([H])[H])C([H])([H])[H]	0 (Inactive)	0	0	0
1585	PUBCHEM_CID_44484491	[H]OC([H])([H])[C@@]([H])(N1C(=O)C([H])([H])c2c([H])c(N([H])C(=O)c3c([H])c([H])nc([H])c3[H])c([H])c([H])c2O[C@]([H])(C([H])([H])N(C(=O)N([H])c2c(noc2C([H])([H])[H])C([H])([H])[H])C([H])([H])[H])[C@]([H])(C([H])([H])[H])C1([H])[H])C([H])([H])[H]	0 (Inactive)	0	0	0
1586	PUBCHEM_CID_44484492	[H]OC([H])([H])[C@@]([H])(N1C(=O)C([H])([H])c2c([H])c(N([H])C(=O)C3([H])C([H])([H])C3([H])[H])c([H])c([H])c2O[C@]([H])(C([H])([H])N(C([H])([H])[H])S(=O)(=O)c2c([H])c([H])c(c([H])c2[H])C([H])([H])[H])[C@]([H])(C([H])([H])[H])C1([H])[H])C([H])([H])[H]	0 (Inactive)	0	0	0
1587	PUBCHEM_CID_44484493	[H]OC([H])([H])[C@@]([H])(N1C(=O)C([H])([H])c2c([H])c(N([H])S(=O)(=O)c3sc([H])c([H])c3[H])c([H])c([H])c2O[C@]([H])(C([H])([H])N(C(=O)N([H])c2c([H])c([H])c3OC([H])([H])Oc3c2[H])C([H])([H])[H])[C@]([H])(C([H])([H])[H])C1([H])[H])C([H])([H])[H]	0 (Inactive)	0	0	0
1588	PUBCHEM_CID_44484494	[H]OC([H])([H])[C@@]([H])(N1C(=O)C([H])([H])c2c([H])c(N([H])S(=O)(=O)c3c(noc3C([H])([H])[H])C([H])([H])[H])c([H])c([H])c2O[C@]([H])(C([H])([H])N(C(=O)N([H])c2c([H])c([H])c(c([H])c2[H])C(F)(F)F)C([H])([H])[H])[C@]([H])(C([H])([H])[H])C1([H])[H])C([H])([H])[H]	0 (Inactive)	0	0	0
1589	PUBCHEM_CID_44484496	[H]OC([H])([H])[C@]([H])(N1C(=O)C([H])([H])c2c([H])c(N([H])C(=O)N([H])c3c(noc3C([H])([H])[H])C([H])([H])[H])c([H])c([H])c2O[C@]([H])(C([H])([H])N(C([H])([H])[H])C([H])([H])c2c([H])c([H])c(OC([H])([H])[H])c([H])c2[H])[C@]([H])(C([H])([H])[H])C1([H])[H])C([H])([H])[H]	0 (Inactive)	0	0	0
1590	PUBCHEM_CID_44484498	[H]OC([H])([H])[C@]([H])(N1C(=O)C([H])([H])c2c([H])c(N([H])C(=O)N([H])c3c([H])c([H])c4OC([H])([H])Oc4c3[H])c([H])c([H])c2O[C@]([H])(C([H])([H])N([H])C([H])([H])[H])[C@]([H])(C([H])([H])[H])C1([H])[H])C([H])([H])[H]	0 (Inactive)	0	0	0
1591	PUBCHEM_CID_44484499	[H]OC([H])([H])[C@]([H])(N1C(=O)C([H])([H])c2c([H])c(N([H])C(=O)C([H])([H])C([H])([H])C(F)(F)F)c([H])c([H])c2O[C@]([H])(C([H])([H])N(C([H])([H])[H])C([H])([H])c2c([H])c([H])c3OC([H])([H])Oc3c2[H])[C@]([H])(C([H])([H])[H])C1([H])[H])C([H])([H])[H]	0 (Inactive)	0	0	0
1592	PUBCHEM_CID_44484501	[H]OC([H])([H])[C@@]([H])(N1C(=O)C([H])([H])c2c([H])c(c([H])c([H])c2O[C@]([H])(C([H])([H])N(C([H])([H])[H])S(=O)(=O)c2sc([H])c([H])c2[H])[C@]([H])(C([H])([H])[H])C1([H])[H])N(C([H])([H])[H])C([H])([H])[H])C([H])([H])[H]	0 (Inactive)	0	0	0
1593	PUBCHEM_CID_44484502	[H]OC([H])([H])[C@]([H])(N1C(=O)C([H])([H])c2c([H])c(N([H])C(=O)C3([H])C([H])([H])C3([H])[H])c([H])c([H])c2O[C@]([H])(C([H])([H])N(C(=O)N([H])c2c([H])c([H])c([H])c([H])c2[H])C([H])([H])[H])[C@]([H])(C([H])([H])[H])C1([H])[H])C([H])([H])[H]	0 (Inactive)	0	0	0
1594	PUBCHEM_CID_44484504	[H]OC([H])([H])[C@@]([H])(N1C(=O)C([H])([H])c2c([H])c(N([H])C(=O)C([H])([H])C([H])([H])C([H])([H])N(C([H])([H])[H])C([H])([H])[H])c([H])c([H])c2O[C@]([H])(C([H])([H])N(C(=O)N([H])C([H])(C([H])([H])[H])C([H])([H])[H])C([H])([H])[H])[C@@]([H])(C([H])([H])[H])C1([H])[H])C([H])([H])[H]	0 (Inactive)	0	0	0
1595	PUBCHEM_CID_44202824	[H]OC([H])([H])[C@]([H])(N1C(=O)c2c([H])c(N([H])C(=O)N([H])C3([H])C([H])([H])C([H])([H])C([H])([H])C([H])([H])C3([H])[H])c([H])c([H])c2O[C@]([H])(C([H])([H])N(C(=O)N([H])C2([H])C([H])([H])C([H])([H])C([H])([H])C([H])([H])C2([H])[H])C([H])([H])[H])[C@@]([H])(C([H])([H])[H])C1([H])[H])C([H])([H])[H]	0 (Inactive)	0	0	0
1596	PUBCHEM_CID_44484603	[H]OC([H])([H])[C@]([H])(N1C(=O)c2c([H])c(N([H])S(=O)(=O)c3c([H])c([H])c(Cl)c([H])c3[H])c([H])c([H])c2O[C@]([H])(C([H])([H])N(C([H])([H])[H])S(=O)(=O)c2c([H])c([H])c(F)c([H])c2[H])[C@@]([H])(C([H])([H])[H])C1([H])[H])C([H])([H])[H]	0 (Inactive)	0	0	0
1597	PUBCHEM_CID_44202723	[H]OC([H])([H])[C@]([H])(N1C(=O)c2c([H])c(N([H])S(=O)(=O)c3c([H])c([H])c(F)c([H])c3[H])c([H])c([H])c2O[C@]([H])(C([H])([H])N(C([H])([H])[H])S(=O)(=O)c2c([H])c([H])c([H])c([H])c2[H])[C@@]([H])(C([H])([H])[H])C1([H])[H])C([H])([H])[H]	0 (Inactive)	0	0	0
1598	PUBCHEM_CID_44202673	[H]OC([H])([H])[C@]([H])(N1C(=O)c2c([H])c(N([H])C(=O)N([H])c3c([H])c([H])c([H])c([H])c3[H])c([H])c([H])c2O[C@]([H])(C([H])([H])N(C([H])([H])[H])S(=O)(=O)c2c([H])c([H])c([H])c([H])c2[H])[C@@]([H])(C([H])([H])[H])C1([H])[H])C([H])([H])[H]	0 (Inactive)	0	0	0
1600	PUBCHEM_CID_44484604	[H]OC([H])([H])[C@]([H])(N1C(=O)c2c([H])c(N([H])S(=O)(=O)c3c([H])c([H])c(Cl)c([H])c3[H])c([H])c([H])c2O[C@]([H])(C([H])([H])N(C([H])([H])[H])C([H])([H])c2c([H])c([H])c(c([H])c2[H])C(F)(F)F)[C@@]([H])(C([H])([H])[H])C1([H])[H])C([H])([H])[H]	0 (Inactive)	0	0	0
1601	PUBCHEM_CID_44202535	[H]OC([H])([H])[C@]([H])(N1C(=O)c2c([H])c(N([H])C(=O)N([H])c3c([H])c([H])c(c([H])c3[H])C(F)(F)F)c([H])c([H])c2O[C@]([H])(C([H])([H])N(C([H])([H])[H])S(=O)(=O)c2c([H])c([H])c(OC([H])([H])[H])c([H])c2[H])[C@@]([H])(C([H])([H])[H])C1([H])[H])C([H])([H])[H]	0 (Inactive)	0	0	0
1602	PUBCHEM_CID_44484605	[H]OC([H])([H])[C@]([H])(N1C(=O)c2c([H])c(N([H])C(=O)N([H])c3c([H])c([H])c([H])c4c([H])c([H])c([H])c([H])c34)c([H])c([H])c2O[C@]([H])(C([H])([H])N(C([H])([H])[H])C([H])([H])c2c([H])c([H])nc([H])c2[H])[C@@]([H])(C([H])([H])[H])C1([H])[H])C([H])([H])[H]	0 (Inactive)	0	0	0
1603	PUBCHEM_CID_44484606	[H]OC([H])([H])[C@]([H])(N1C(=O)c2c([H])c(N([H])S(=O)(=O)c3c([H])c([H])c(c([H])c3[H])C([H])([H])[H])c([H])c([H])c2O[C@]([H])(C([H])([H])N(C([H])([H])[H])S(=O)(=O)c2nc([H])n(c2[H])C([H])([H])[H])[C@@]([H])(C([H])([H])[H])C1([H])[H])C([H])([H])[H]	0 (Inactive)	0	0	0
1604	PUBCHEM_CID_44202062	[H]OC([H])([H])[C@]([H])(N1C(=O)c2c([H])c(N([H])S(=O)(=O)c3c([H])c([H])c(OC([H])([H])[H])c([H])c3[H])c([H])c([H])c2O[C@]([H])(C([H])([H])N(C(=O)N([H])C2([H])C([H])([H])C([H])([H])C([H])([H])C([H])([H])C2([H])[H])C([H])([H])[H])[C@@]([H])(C([H])([H])[H])C1([H])[H])C([H])([H])[H]	0 (Inactive)	0	0	0
1605	PUBCHEM_CID_44202687	[H]OC([H])([H])[C@]([H])(N1C(=O)c2c([H])c(N([H])S(=O)(=O)c3nc([H])n(c3[H])C([H])([H])[H])c([H])c([H])c2O[C@]([H])(C([H])([H])N(C(=O)N([H])C([H])(C([H])([H])[H])C([H])([H])[H])C([H])([H])[H])[C@@]([H])(C([H])([H])[H])C1([H])[H])C([H])([H])[H]	0 (Inactive)	0	0	0
1606	PUBCHEM_CID_44484607	[H]OC([H])([H])[C@]([H])(N1C(=O)c2c([H])c(N([H])C(=O)N([H])c3c(noc3C([H])([H])[H])C([H])([H])[H])c([H])c([H])c2O[C@@]([H])(C([H])([H])N(C([H])([H])[H])S(=O)(=O)c2c([H])c([H])c(Cl)c([H])c2[H])[C@]([H])(C([H])([H])[H])C1([H])[H])C([H])([H])[H]	0 (Inactive)	0	0	0
1607	PUBCHEM_CID_44484608	[H]OC([H])([H])[C@]([H])(N1C(=O)c2c([H])c(N([H])S(=O)(=O)c3c([H])c([H])c(c([H])c3[H])C([H])([H])[H])c([H])c([H])c2O[C@@]([H])(C([H])([H])N(C([H])([H])[H])C([H])([H])c2c([H])c([H])c(c([H])c2[H])C(F)(F)F)[C@]([H])(C([H])([H])[H])C1([H])[H])C([H])([H])[H]	0 (Inactive)	0	0	0
1608	PUBCHEM_CID_44484609	[H]OC([H])([H])[C@]([H])(N1C(=O)c2c([H])c(N([H])C(=O)N([H])c3c([H])c([H])c(F)c([H])c3[H])c([H])c([H])c2O[C@@]([H])(C([H])([H])N(C([H])([H])[H])S(=O)(=O)c2c([H])c([H])c(F)c([H])c2[H])[C@]([H])(C([H])([H])[H])C1([H])[H])C([H])([H])[H]	0 (Inactive)	0	0	0
1609	PUBCHEM_CID_44484610	[H]OC([H])([H])[C@]([H])(N1C(=O)c2c([H])c(N([H])C(=O)N([H])c3c([H])c([H])c(F)c([H])c3[H])c([H])c([H])c2O[C@@]([H])(C([H])([H])N(C(=O)N([H])c2c([H])c([H])c([H])c([H])c2[H])C([H])([H])[H])[C@]([H])(C([H])([H])[H])C1([H])[H])C([H])([H])[H]	0 (Inactive)	0	0	0
1610	PUBCHEM_CID_44484611	[H]OC([H])([H])[C@]([H])(N1C(=O)c2c([H])c(N([H])S(=O)(=O)c3c([H])c([H])c(F)c([H])c3[H])c([H])c([H])c2O[C@@]([H])(C([H])([H])N(C(=O)N([H])c2c([H])c([H])c3OC([H])([H])Oc3c2[H])C([H])([H])[H])[C@]([H])(C([H])([H])[H])C1([H])[H])C([H])([H])[H]	0 (Inactive)	0	0	0
1611	PUBCHEM_CID_44484612	[H]OC([H])([H])[C@]([H])(N1C(=O)c2c([H])c(N([H])S(=O)(=O)c3c([H])c([H])c(F)c([H])c3[H])c([H])c([H])c2O[C@@]([H])(C([H])([H])N(C(=O)N([H])c2c(noc2C([H])([H])[H])C([H])([H])[H])C([H])([H])[H])[C@]([H])(C([H])([H])[H])C1([H])[H])C([H])([H])[H]	0 (Inactive)	0	0	0
1612	PUBCHEM_CID_44484613	[H]OC([H])([H])[C@]([H])(N1C(=O)c2c([H])c(N([H])S(=O)(=O)c3c([H])c([H])c([H])c([H])c3[H])c([H])c([H])c2O[C@@]([H])(C([H])([H])N(C([H])([H])[H])S(=O)(=O)c2c([H])c([H])c(Cl)c([H])c2[H])[C@]([H])(C([H])([H])[H])C1([H])[H])C([H])([H])[H]	0 (Inactive)	0	0	0
1613	PUBCHEM_CID_44484614	[H]OC([H])([H])[C@]([H])(N1C(=O)c2c([H])c(N([H])C(=O)N([H])c3c([H])c([H])c4OC([H])([H])Oc4c3[H])c([H])c([H])c2O[C@@]([H])(C([H])([H])N(C([H])([H])[H])S(=O)(=O)c2c([H])c([H])c(OC([H])([H])[H])c([H])c2[H])[C@]([H])(C([H])([H])[H])C1([H])[H])C([H])([H])[H]	0 (Inactive)	0	0	0
1614	PUBCHEM_CID_44484615	[H]OC([H])([H])[C@]([H])(N1C(=O)c2c([H])c(N([H])C(=O)C([H])([H])c3c([H])c([H])c([H])c([H])c3[H])c([H])c([H])c2O[C@@]([H])(C([H])([H])N(C([H])([H])[H])C([H])([H])c2c([H])c([H])c(Cl)c(Cl)c2[H])[C@]([H])(C([H])([H])[H])C1([H])[H])C([H])([H])[H]	0 (Inactive)	0	0	0
1616	PUBCHEM_CID_44484617	[H]OC([H])([H])[C@]([H])(N1C(=O)c2c([H])c(N([H])S(=O)(=O)c3c([H])c([H])c(Cl)c([H])c3[H])c([H])c([H])c2O[C@@]([H])(C([H])([H])N(C([H])([H])[H])S(=O)(=O)c2c([H])c([H])c([H])c([H])c2[H])[C@]([H])(C([H])([H])[H])C1([H])[H])C([H])([H])[H]	0 (Inactive)	0	0	0
1617	PUBCHEM_CID_44484618	[H]OC([H])([H])[C@]([H])(N1C(=O)c2c([H])c(N([H])C(=O)C3([H])C([H])([H])C([H])([H])C([H])([H])C([H])([H])C3([H])[H])c([H])c([H])c2O[C@@]([H])(C([H])([H])N(C([H])([H])[H])C([H])([H])c2c([H])c([H])c3OC([H])([H])Oc3c2[H])[C@]([H])(C([H])([H])[H])C1([H])[H])C([H])([H])[H]	0 (Inactive)	0	0	0
1618	PUBCHEM_CID_44202059	[H]OC([H])([H])[C@]([H])(N1C(=O)c2c([H])c(N([H])C(=O)N([H])c3c([H])c([H])c([H])c4c([H])c([H])c([H])c([H])c34)c([H])c([H])c2O[C@@]([H])(C([H])([H])N(C([H])([H])[H])S(=O)(=O)c2c([H])c([H])c(c([H])c2[H])C([H])([H])[H])[C@]([H])(C([H])([H])[H])C1([H])[H])C([H])([H])[H]	0 (Inactive)	0	0	0
1619	PUBCHEM_CID_44484619	[H]OC([H])([H])[C@]([H])(N1C(=O)c2c([H])c(N([H])S(=O)(=O)c3c([H])c([H])c(F)c([H])c3[H])c([H])c([H])c2O[C@@]([H])(C([H])([H])N(C([H])([H])[H])C([H])([H])c2c([H])c([H])c(Cl)c(Cl)c2[H])[C@]([H])(C([H])([H])[H])C1([H])[H])C([H])([H])[H]	0 (Inactive)	0	0	0
1620	PUBCHEM_CID_44484620	[H]OC([H])([H])[C@]([H])(N1C(=O)c2c([H])c(N([H])S(=O)(=O)c3sc([H])c([H])c3[H])c([H])c([H])c2O[C@@]([H])(C([H])([H])N(C([H])([H])[H])S(=O)(=O)c2sc([H])c([H])c2[H])[C@]([H])(C([H])([H])[H])C1([H])[H])C([H])([H])[H]	0 (Inactive)	0	0	0
1621	PUBCHEM_CID_44484621	[H]OC([H])([H])[C@]([H])(N1C(=O)c2c([H])c(N([H])C(=O)N([H])c3c([H])c([H])c4OC([H])([H])Oc4c3[H])c([H])c([H])c2O[C@@]([H])(C([H])([H])N(C([H])([H])[H])S(=O)(=O)c2c([H])c([H])c(Cl)c([H])c2[H])[C@]([H])(C([H])([H])[H])C1([H])[H])C([H])([H])[H]	0 (Inactive)	0	0	0
1622	PUBCHEM_CID_44484622	[H]OC([H])([H])[C@]([H])(N1C(=O)c2c([H])c(N([H])S(=O)(=O)c3c([H])c([H])c(Cl)c([H])c3[H])c([H])c([H])c2O[C@@]([H])(C([H])([H])N(C([H])([H])[H])C([H])([H])c2c([H])c([H])c(c([H])c2[H])-c2c([H])c([H])c([H])c([H])c2[H])[C@]([H])(C([H])([H])[H])C1([H])[H])C([H])([H])[H]	0 (Inactive)	0	0	0
1623	PUBCHEM_CID_44484623	[H]OC([H])([H])[C@]([H])(N1C(=O)c2c([H])c(N([H])C(=O)N([H])c3c([H])c([H])c4OC([H])([H])Oc4c3[H])c([H])c([H])c2O[C@@]([H])(C([H])([H])N(C([H])([H])[H])C([H])([H])c2c([H])c([H])c(c([H])c2[H])-c2c([H])c([H])c([H])c([H])c2[H])[C@]([H])(C([H])([H])[H])C1([H])[H])C([H])([H])[H]	0 (Inactive)	0	0	0
1624	PUBCHEM_CID_44484624	[H]OC([H])([H])[C@]([H])(N1C(=O)c2c([H])c(N([H])C(=O)N([H])c3c(noc3C([H])([H])[H])C([H])([H])[H])c([H])c([H])c2O[C@@]([H])(C([H])([H])N(C([H])([H])[H])S(=O)(=O)c2c([H])c([H])c(F)c([H])c2[H])[C@]([H])(C([H])([H])[H])C1([H])[H])C([H])([H])[H]	0 (Inactive)	0	0	0
1625	PUBCHEM_CID_44484625	[H]OC([H])([H])[C@]([H])(N1C(=O)c2c([H])c(N([H])S(=O)(=O)c3c([H])c([H])c([H])c([H])c3[H])c([H])c([H])c2O[C@@]([H])(C([H])([H])N(C([H])([H])[H])C([H])([H])c2c([H])c([H])c(c([H])c2[H])C(F)(F)F)[C@]([H])(C([H])([H])[H])C1([H])[H])C([H])([H])[H]	0 (Inactive)	0	0	0
1626	PUBCHEM_CID_44484626	[H]OC([H])([H])[C@]([H])(N1C(=O)c2c([H])c(N([H])S(=O)(=O)c3c([H])c([H])c(c([H])c3[H])C([H])([H])[H])c([H])c([H])c2O[C@@]([H])(C([H])([H])N(C([H])([H])[H])S(=O)(=O)c2nc([H])n(c2[H])C([H])([H])[H])[C@]([H])(C([H])([H])[H])C1([H])[H])C([H])([H])[H]	0 (Inactive)	0	0	0
1627	PUBCHEM_CID_44484627	[H]OC([H])([H])[C@]([H])(N1C(=O)c2c([H])c(N([H])S(=O)(=O)c3c([H])c([H])c(c([H])c3[H])C([H])([H])[H])c([H])c([H])c2O[C@@]([H])(C([H])([H])N(C([H])([H])[H])C([H])([H])c2c([H])c([H])c(c([H])c2[H])-c2c([H])c([H])c([H])c([H])c2[H])[C@]([H])(C([H])([H])[H])C1([H])[H])C([H])([H])[H]	0 (Inactive)	0	0	0
1628	PUBCHEM_CID_44484628	[H]OC([H])([H])[C@]([H])(N1C(=O)c2c([H])c(N([H])S(=O)(=O)c3c([H])c([H])c(Cl)c([H])c3[H])c([H])c([H])c2O[C@@]([H])(C([H])([H])N(C(=O)N([H])C([H])(C([H])([H])[H])C([H])([H])[H])C([H])([H])[H])[C@]([H])(C([H])([H])[H])C1([H])[H])C([H])([H])[H]	0 (Inactive)	0	0	0
1629	PUBCHEM_CID_44484629	[H]OC([H])([H])[C@]([H])(N1C(=O)c2c([H])c(N([H])C(=O)N([H])c3c([H])c([H])c([H])c4c([H])c([H])c([H])c([H])c34)c([H])c([H])c2O[C@@]([H])(C([H])([H])N(C([H])([H])[H])S(=O)(=O)c2c([H])c([H])c(F)c([H])c2[H])[C@]([H])(C([H])([H])[H])C1([H])[H])C([H])([H])[H]	0 (Inactive)	0	0	0
1630	PUBCHEM_CID_44202980	[H]OC([H])([H])[C@]([H])(N1C(=O)c2c([H])c(N([H])C(=O)N([H])c3c([H])c([H])c(c([H])c3[H])C(F)(F)F)c([H])c([H])c2O[C@@]([H])(C([H])([H])N(C([H])([H])[H])S(=O)(=O)c2c([H])c([H])c([H])c([H])c2[H])[C@]([H])(C([H])([H])[H])C1([H])[H])C([H])([H])[H]	0 (Inactive)	0	0	0
1631	PUBCHEM_CID_44484630	[H]OC([H])([H])[C@]([H])(N1C(=O)c2c([H])c(N([H])S(=O)(=O)c3nc([H])n(c3[H])C([H])([H])[H])c([H])c([H])c2O[C@@]([H])(C([H])([H])N(C(=O)N([H])c2c([H])c([H])c(OC([H])([H])[H])c([H])c2[H])C([H])([H])[H])[C@]([H])(C([H])([H])[H])C1([H])[H])C([H])([H])[H]	0 (Inactive)	0	0	0
1633	PUBCHEM_CID_44484632	[H]OC([H])([H])[C@]([H])(N1C(=O)c2c([H])c(N([H])C(=O)N([H])c3c([H])c([H])c([H])c4c([H])c([H])c([H])c([H])c34)c([H])c([H])c2O[C@@]([H])(C([H])([H])N(C([H])([H])[H])S(=O)(=O)c2sc([H])c([H])c2[H])[C@]([H])(C([H])([H])[H])C1([H])[H])C([H])([H])[H]	0 (Inactive)	0	0	0
[truncated: 26,741 more rows]

## Sheet: Table S4 - Test 1 Set
				Predicted Probabilities of Being Active
[truncated: 879 more rows]

[truncated: 3 more sheets: Table S5 - Train 2 Set, Table S6 - Test 2 Set, Table S7 - VS Set]
